# Supplementary material for: Differential proteomic analysis of mouse cerebrums with high-fat diet (HFD)-induced hyperlipidemia
Source: PeerJ. 2022 Aug 3;10:e13806. doi: 10.7717/peerj.13806 (PMC9356585; doi:10.7717/peerj.13806)
Supplement: Supplemental Information 2 [file peerj-10-13806-s002.xlsx]

## Sheet: 1-HFD composition
Supplemental Table S1-1. The composition of the high-fat diet used to induce hyperlipidemia in mice (D12492, 5.24 kcal/g, 60% energy from fat).
Ingredient	Gram	Kcal
Casein, 80 Mesh	200	800
L-Cystine	3	12
Maltodextrin	125	500
Sucrose	68.8	275.2
Cellulose	50	0
Soybean oil	25	225
Lard	245	2205
AIN-93 Mineral mix	45	0
AIN-93 Vitamin mix	10	40
Choline bitartrate	2.5	0
Total	774.3	4057.2

## Sheet: 2-Body weight
Supplemental Table S1-2. Changes of the body weights of the mice over time (20 weeks).
Time (week)	Control (g)								Model (g)								SIM (g)
	control-1	control-2	control-3	control-4	control-5	control-6	mean (n=6)	SD (n=6)	model-1	model-2	model-3	model-4	model-5	model-6	mean (n=6)	SD (n=6)	SIM-1	SIM-2	SIM-3	SIM-4	SIM-5	SIM-6	mean (n=6)	SD (n=6)
0	20.3	19.8	18.7	19.3	19.3	18.7	19.35	0.570818	19.8	18.9	20.7	18.2	19.2	17.8	19.1	0.966092	18.8	17.95	19.66	20.34	19.79	18.89	19.2383	0.781994
1	20.2	21.2	20.5	20	19.8	20.2	20.3167	0.448764	20.3	19.9	20.2	21.2	20.5	18.4	20.0833	0.851306	19.28	20.94	22.25	20.13	20.29	19.89	20.4633	0.93893
2	21.7	21.4	21.3	22.7	22.1	21.8	21.8333	0.467856	21.1	22.6	22.3	21.6	23.1	22.2	22.15	0.65	22.07	21.42	21.18	20.51	21.09	22.59	21.4767	0.67906
3	21.1	21.7	23.5	22	22.8	21.8	22.15	0.78475	21.9	25.2	22.5	22	23.6	21.5	22.7833	1.26678	22.46	25.79	23.08	23.79	23.64	27.21	24.3283	1.64586
4	24.7	23.4	21.3	22.7	22.1	21.8	22.6667	1.12645	24.1	24.6	25.3	25.6	25.1	26.2	25.15	0.675154	24.72	25.17	25.94	26.4	26.02	26.56	25.8017	0.65433
5	22.8	22.6	23.8	23.8	22.6	22.7	23.05	0.534634	23.4	26.6	26.4	25.5	26.6	26.3	25.8	1.13578	24	27.22	27.08	26.3	25.26	28.72	26.43	1.50452
6	23.3	22.4	24.7	24.6	25.7	23.9	24.1	1.05987	28.6	25.3	28.2	27.5	28.4	28.7	27.7833	1.17674	29.34	25.89	28.92	28.36	30.88	27.31	28.45	1.56946
7	24	26.2	26.1	24.8	22.5	25.7	24.8833	1.31329	26.8	29.5	29.1	28.2	29.1	30.1	28.8	1.0583	26.4	29.9	28.66	27.92	27.79	30.59	28.5433	1.39002
8	23.9	24.9	24.3	23.5	23.2	27	24.4667	1.25786	32.5	29.1	28.6	28.2	28.5	31.3	29.7	1.61555	32.68	29.2	28.76	28.5	34.4	30.8	30.7233	2.17833
9	27.1	23.6	24	27.2	23.6	25.3	25.1333	1.53587	29.8	30.7	29.2	29.8	30.4	32.8	30.45	1.15434	29.66	30.49	29.06	30.37	31.22	32.16	30.4933	1.00581
10	24.3	25.5	26.1	24.3	25.1	25.5	25.1333	0.657436	31.9	31.7	30.8	30.2	32.9	32.7	31.7	0.960902	31.75	31.48	30.65	30.78	33.42	33.52	31.9333	1.15065
11	25.1	28.7	24.5	27.6	27.9	27.9	26.95	1.56605	33.1	32.4	31.2	34.3	30.6	33.8	32.5667	1.32749	33.63	32.17	31.71	34.95	34.68	34.26	33.5667	1.22717
12	26.1	25.4	27.4	26.3	29.1	29.1	27.2333	1.44415	35.8	34.2	32.9	32.2	32.9	35.4	33.9	1.34412	35.63	33.97	32.75	32.81	37.51	36.16	34.805	1.76701
13	27.4	29.5	27.1	27.2	29.2	28.3	28.1167	0.958152	35.8	36.1	34.5	33.1	34.9	33.2	34.6	1.1547	35.63	32.88	34.33	33.73	37.51	35.85	34.9883	1.52615
14	28.6	28.7	26.5	27.1	30	28.2	28.1833	1.13639	35.8	37.1	34.8	37.8	33.9	35.4	35.8	1.32035	35.63	32.88	34.64	36.48	37.51	36.45	35.5983	1.4981
15	29.8	30.1	28.8	27.9	28.6	27.3	28.75	0.981071	34.6	36.4	38.1	33.8	36.7	35.8	35.9	1.40475	34.43	36.15	34.93	34.44	36.24	38.49	35.78	1.41617
16	27.3	28.3	30.2	28.7	27.9	29.1	28.5833	0.920899	38.6	38.1	39.9	37.7	35.6	39.7	38.2667	1.43139	38.42	38.09	35.73	35.35	40.44	38.2	37.705	1.72392
17	30.6	28.1	28.6	29	29.7	28.1	29.0167	0.897063	36.2	40.3	40.4	39.7	39.2	39.2	39.1667	1.40791	36.03	39.39	41.76	35.35	40.08	38.38	38.4983	2.23435
18	30.91	28.38	28.89	29.29	32.3	30.38	30.025	1.33037	38.56	42.66	40.78	43.05	39.55	39.55	40.6917	1.66306	36.39	39.78	45.75	39.01	38.3	38.76	39.665	2.91197
19	31.52	28.95	29.46	29.88	30.6	32.95	30.56	1.34783	40.29	42.4	39.56	43.75	42.26	43.26	41.92	1.51201	37.12	40.58	39.38	43.04	39.06	39.53	39.785	1.78344
20	32.47	29.82	30.35	30.77	31.51	29.82	30.79	0.95014	44.41	40.52	45.75	42.82	42.95	39.35	42.6333	2.16994	40.39	41.8	44.43	44.33	41.27	42.6	42.47	1.50185

## Sheet: 3-Organ index
Supplemental Table S1-3. Organ index of the mice at the end of the 20-week experiment.
Organ index	Control								Model								SIM
	control-1	control-2	control-3	control-4	control-5	control-6	mean (n=6)	SD (n=6)	model-1	model-2	model-3	model-4	model-5	model-6	mean (n=6)	SD (n=6)	SIM-1	SIM-2	SIM-3	SIM-4	SIM-5	SIM-6	mean (n=6)	SD (n=6)
Percent abdominal fat (%)	2.4	2.21	2.14	2.12	2.06	1.94	2.145	0.14092	4.7	4.25	4.3	3.83	4.47	5.61	4.52667	0.550777	4.27	2.45	3.69	4.36	4.58	4.3	3.94167	0.719616
Liver index (%)	3.54	3.26	3.43	3.36	2.9	3.34	3.305	0.200479	5.32	5.03	5.08	5.16	5.33	4.57	5.08167	0.254651	4.4	5.03	4.68	4.79	4.63	4.82	4.725	0.192765

## Sheet: 4-Serum lipids
Supplemental Table S1-4. Serum lipid levels of the mice at the end of the 20-week experiment.
Abbreviation: LDL,low-density lipoprotein; TG, triglyceride; TC, total cholesterol; HDL, high-density lipoprotein.
Serum lipids	Control								Model								SIM
	control-1	control-2	control-3	control-4	control-5	control-6	mean (n=6)	SD (n=6)	model-1	model-2	model-3	model-4	model-5	model-6	mean (n=6)	SD (n=6)	SIM-1	SIM-2	SIM-3	SIM-4	SIM-5	SIM-6	mean (n=6)	SD (n=6)
LDL (mmol/L)	1.31	1.43	1.47	1.48	1.52	1.26	1.41167	0.0944134	5.68	5.74	5.21	5.07	5.74	5.29	5.455	0.27342	4.35	4.22	4.19	3.89	4.07	4.26	4.16333	0.148062
TG (mmol/L)	1.92	1.11	2.5	0.97	0.94	1.06	1.41667	0.588067	3.97	4.44	4.84	5.12	4.75	6.11	4.87167	0.659581	2.51	2.11	3.27	2.26	2.15	5.16	2.91	1.07952
TC (mmol/L)	2.21	1.64	2.55	1.71	1.92	1.05	1.84667	0.470484	6.01	7.21	8.4	6.08	5.82	7.15	6.77833	0.908358	5.23	4.97	6.66	7.87	6.54	6.32	6.265	0.962544
HDL (mmol/L)	2.11	1.94	1.84	1.97	2.62	2.07	2.09167	0.25202	1.13	1.08	1.11	1.69	1.24	0.98	1.205	0.229982	1.06	1.44	1.37	1.38	1.09	1.34	1.28	0.148212

## Sheet: 5-Serum liver enzymes
Supplemental Table S1-5. Activities of serum liver enzymes at the end of the 20-week experiment..
Abbreviation: ALT, alanine aminotransferase; AST, aspartate aminotransferase; γ-GGT, γ-glutamyltransferase.
Serum liver enzymes	Control								Model								SIM
	control-1	control-2	control-3	control-4	control-5	control-6	mean (n=6)	SD (n=6)	model-1	model-2	model-3	model-4	model-5	model-6	mean (n=6)	SD (n=6)	SIM-1	SIM-2	SIM-3	SIM-4	SIM-5	SIM-6	mean (n=6)	SD (n=6)
ALT (U/L)	51.1	69.15	60.41	57.3	57.01	38.33	55.55	9.39951	209.45	176.48	267.8	166.04	166.45	157.53	190.625	38.2853	93.66	81.41	134.91	99.02	101.89	133.73	107.437	20.062
AST (U/L)	122.99	124.94	115.43	64.2	70.86	215.98	119.067	49.648	269.86	157.04	256.86	275.98	257.77	262.78	246.715	40.655	191.14	225.93	151.3	182.17	173.21	170.16	182.318	22.9955
γ-GGT (U/L)	2.67	3.18	3.94	4.14	3.27	4.08	3.54667	0.543252	8.28	7.31	7.09	8.97	8.46	6.87	7.83	0.778738	4.98	3.88	5.12	4.59	5.68	6.17	5.07	0.734756

## Sheet: 6-Oxidative stress parameters
Supplemental Table S1-6. Oxidative stress parameters in liver at the end of the 20-week experiment.
Abbreviation: SOD, superoxide dismutase; MDA, malondialdehyde.
Oxidative stress parameters	Control								Model								SIM
	control-1	control-2	control-3	control-4	control-5	control-6	mean (n=6)	SD (n=6)	model-1	model-2	model-3	model-4	model-5	model-6	mean (n=6)	SD (n=6)	SIM-1	SIM-2	SIM-3	SIM-4	SIM-5	SIM-6	mean (n=6)	SD (n=6)
SOD (U/mg protein)	89.58	164.25	153.25	146.57	159.57	174.54	147.96	27.5221	60.58	47.69	59.69	74.69	78.69	90.28	68.6033	14.0822	80.69	71.56	102.62	95.26	87.32	91.62	88.1783	10.0294
MDA (nmol/mg protein)	0.68	0.72	0.82	0.59	0.64	0.68	0.688333	0.071278	1.58	1.69	1.98	2.07	2.11	2.78	2.035	0.385346	1.01	1.11	1.23	1.81	1.09	1.11	1.22667	0.26868
