# Supplementary material for: Differential proteomic analysis of mouse cerebrums with high-fat diet (HFD)-induced hyperlipidemia
Source: PeerJ. 2022 Aug 3;10:e13806. doi: 10.7717/peerj.13806 (PMC9356585; doi:10.7717/peerj.13806)
Supplement: Supplemental Information 3 [file peerj-10-13806-s003.xlsx]

## Sheet: 1-MaxQuant output
Supplemental Table S2. Proteins detected in the cerebrum hemispheres of the HFD-induced hyperlipidemic mice.
Supplemental Table S2-1. MaxQuant analysis results.
1) This table contains the protein-level identification and quantitation results of 5479 hits obtained using MaxQuant (ver. 1.6.10.43). Totally 54 LC-MS/MS data (3 animal groups ´ 3 animals ´ 2 hemispheres ´ 3 LC-MS/MS technical replicates) were submitted to MaxQuant. The parameter settings were described in the "Materials and Methods" section of the main text. "Match between runs" was enabled an…
2) Row 6: In the names of the LC-MS/MS runs, the "C" stands for "control group", "M" for "model group" and "T" for "simvastatin-treated (SIM) group". The number that follows is the the number of the animal, and then the "L" and "R" for left and right cerebrum hemispheres, respectively. "R1", "R2" and "R3" after the second hyphen mark stand for the three LC-MS/MS replicate runs for each sample.
LFQ intensity C1-L-R1	LFQ intensity C1-L-R2	LFQ intensity C1-L-R3	LFQ intensity C1-R-R1	LFQ intensity C1-R-R2	LFQ intensity C1-R-R3	LFQ intensity C2-L-R1	LFQ intensity C2-L-R2	LFQ intensity C2-L-R3	LFQ intensity C2-R-R1	LFQ intensity C2-R-R2	LFQ intensity C2-R-R3	LFQ intensity C3-L-R1	LFQ intensity C3-L-R2	LFQ intensity C3-L-R3	LFQ intensity C3-R-R1	LFQ intensity C3-R-R2	LFQ intensity C3-R-R3	LFQ intensity M1-L-R1	LFQ intensity M1-L-R2	LFQ intensity M1-L-R3	LFQ intensity M1-R-R1	LFQ intensity M1-R-R2	LFQ intensity M1-R-R3	LFQ intensity M2-L-R1	LFQ intensity M2-L-R2	LFQ intensity M2-L-R3	LFQ intensity M2-R-R1	LFQ intensity M2-R-R2	LFQ intensity M2-R-R3	LFQ intensity M3-L-R1	LFQ intensity M3-L-R2	LFQ intensity M3-L-R3	LFQ intensity M3-R-R1	LFQ intensity M3-R-R2	LFQ intensity M3-R-R3	LFQ intensity T1-L-R1	LFQ intensity T1-L-R2	LFQ intensity T1-L-R3	LFQ intensity T1-R-R1	LFQ intensity T1-R-R2	LFQ intensity T1-R-R3	LFQ intensity T2-L-R1	LFQ intensity T2-L-R2	LFQ intensity T2-L-R3	LFQ intensity T2-R-R1	LFQ intensity T2-R-R2	LFQ intensity T2-R-R3	LFQ intensity T3-L-R1	LFQ intensity T3-L-R2
462340	556470	588650	513460	588810	619150	510560	564310	517570	555540	533460	575600	494430	561390	539910	582580	511370	532420	584400	505880	450240	481950	504290	517750	571300	536640	505960	555250	497570	609220	430930	558520	321520	615130	473110	457920	612030	610850	527280	518500	591310	549140	443890	390290	417820	486270	539460	473420	538400	456930
1414200	1522400	1626200	1866100	1742000	1650600	1571900	1653100	1577600	1592200	1497000	1546400	1615300	1545500	1499400	1674900	1551200	1698400	1697800	1678200	1650700	1605800	1604700	1592900	1531600	1530600	1687100	1349400	1540700	1610600	1466900	1450100	1610200	1495600	1523600	1471500	1499400	1673000	1709400	1560400	1585100	1609700	1557300	1576000	1566700	1639600	1496600	1529500	1538100	1547500
2364300	2508800	2846800	2298300	2584600	2736400	2966700	3129400	3029400	2376000	2541500	2996200	3217400	3111400	3102300	3132300	3121600	3052500	2880100	2834500	3027400	3231200	2853100	2670900	3066400	2727400	2979800	2861000	2677800	2757400	2916100	2894100	2879900	2889200	2884800	3124500	3023300	2825900	2910800	2772300	2882000	2765500	3052300	2575700	3005000	2536300	2754500	2679500	2879900	2803600
594600	503000	518700	688760	600510	533030	624190	630720	713320	606180	576260	475150	542920	658260	554580	640620	444100	683690	724640	703910	662800	533120	656590	689660	574660	635800	777040	567200	622670	546270	583820	703650	610700	422320	621120	618990	433140	614490	426250	618480	566230	756640	675910	762480	713130	675380	631980	535320	656090	394690
0	0	0	0	0	0	0	0	0	0	0	0	3902.5	0	0	0	0	0	0	0	0	0	0	0	0	0	0	0	0	3859.4	0	0	0	0	0	0	0	9291.7	66464	0	0	0	0	0	0	0	0	0	0	0
35677	32281	48649	31310	0	45809	0	42119	0	34459	0	0	0	43015	13570	0	0	39454	0	49595	0	30735	0	0	0	6990.3	0	0	0	31593	0	0	47529	0	0	0	0	18867	33677	38502	41489	32515	0	0	59086	0	52862	0	0	0
797440	947890	1046900	1213700	1051300	704050	923360	734810	431390	784350	875490	693990	491550	694500	913540	581050	1025100	1081100	630670	865220	1012700	1015700	761240	628630	742920	912010	845280	431800	861100	540690	928500	414620	517170	890000	237150	282960	798230	474180	734040	574310	942830	652680	553150	450830	588860	639220	527740	682170	448610	666930
142180	172610	189360	200930	188730	176810	177970	171870	222570	199540	185470	130350	210170	190590	144770	174220	219770	157270	213160	231930	236540	178750	190970	135670	189640	207920	244000	244360	179540	183210	152410	155020	164800	196380	195470	215430	230280	210510	213510	203790	161010	202480	250520	185420	61189	173950	144350	116670	160700	211780
58834	264710	207650	314850	105420	166970	241760	131060	103290	0	0	133100	158340	63440	162240	246800	159680	221170	87485	183160	125800	68416	255390	76982	200450	232840	164380	102680	0	108350	185620	46823	97537	52346	69403	59387	178530	246230	140230	312400	115170	208080	106820	219150	0	185180	46934	111730	151440	235510
0	0	0	0	0	0	27697	0	0	0	0	0	0	0	32370	0	0	0	0	0	0	0	0	0	0	15823	0	0	0	0	0	0	0	0	0	0	0	0	0	60053	0	319610	0	0	0	16924	0	0	0	0
439270	432260	526120	380440	700680	669360	499430	450990	436390	436760	406980	491580	771850	337500	382920	559660	434000	315710	470700	536770	278940	234980	539710	416380	480490	426060	514270	591030	350410	381080	439120	593080	516850	389110	480170	1157200	369750	426960	672290	580340	491130	433880	89083	152190	452080	282110	494610	365970	683370	529900
196070	0	294770	0	106060	213650	540490	0	211660	39786	0	0	1384900	0	224120	472760	294890	0	270880	0	210460	377790	112520	214520	0	0	0	0	96687	746430	347070	336090	0	0	0	0	0	862790	0	346130	0	40714	0	251680	0	0	610230	0	127690	178670
121600	161450	129810	139520	223220	156840	257140	260710	190130	259950	161660	166240	210370	175050	258240	196260	186090	168050	193230	179990	192310	223340	196550	225490	242710	209860	199960	152650	94935	106610	88537	142620	179150	252080	140640	166700	76979	149120	171460	135240	181580	175630	238330	203690	137430	70292	120780	92021	198100	128090
0	0	0	0	0	0	0	0	0	0	0	0	0	0	0	0	0	0	0	0	0	0	0	0	0	0	0	0	0	0	0	0	0	0	0	0	0	0	0	0	0	0	0	0	0	0	0	0	0	0
487300	764400	714790	750740	788650	629960	792140	611690	732410	894810	861030	811200	724240	666240	939500	826710	685240	1217400	144810	416420	579940	682050	462210	937660	688020	666500	633700	919910	936130	866290	693480	717320	590280	706020	982960	771510	811820	508730	943450	811390	661480	669610	888710	683890	1001300	646610	581970	571170	584500	731650
3165200	3424700	3262200	3394700	3184300	3704300	3491800	3539000	3494200	3425700	3531200	3446800	3548400	3701300	3426800	3674400	3796300	3812400	3726000	3676600	3834300	3387900	3373200	3530600	3691700	3743800	3748400	3593400	3602400	3618800	3307600	3300000	3381100	3266100	3209700	3169800	3524400	3536300	3866400	3718700	3622000	3545500	3679700	3689000	3952200	3644500	3279800	3620200	3332800	3191800
499500	521170	580410	513480	499730	507120	542580	548680	554210	580520	558270	538600	603880	508270	523100	587160	580290	576710	608160	549560	578510	548030	543510	590030	577130	541510	600590	537260	532570	529330	539760	512330	561950	492180	495660	532530	572220	547300	597400	579180	517670	505640	599040	548240	609850	512690	483210	533770	555800	563680
116940	62764	116390	24545	0	52958	98443	152620	111970	63376	56842	28199	53435	13457	95830	121710	0	137770	72300	138330	43551	143270	137280	82033	140790	117530	113230	93957	27935	86103	73111	99347	110520	102040	102460	148850	61784	82010	41696	133900	110520	159590	49277	97419	75567	49931	106670	107570	115140	77435
0	0	0	22240	0	0	0	0	0	0	0	0	0	0	0	0	0	0	0	0	0	0	0	0	0	0	0	0	0	0	39845	0	0	0	0	0	0	0	0	0	0	0	0	0	18822	0	0	0	0	0
52945	38249	48318	56929	70530	72507	70049	0	16880	58428	50448	58254	40514	63327	40094	80305	11025	56361	66460	73406	0	12779	23564	68051	53423	56281	0	0	59761	0	0	0	62124	139770	62416	45641	55838	38124	66422	24246	29813	56929	57397	41007	0	63190	0	0	0	34187
0	0	0	0	0	0	0	0	0	0	0	0	0	0	0	0	0	0	0	0	0	0	0	0	0	0	0	0	0	0	0	0	0	0	0	0	0	0	0	0	0	0	0	0	0	0	0	0	0	0
1011400	1135900	1130900	1116400	1022100	1065400	1168200	1187300	1186600	1231400	1261700	1203500	1433700	1228900	1304900	1222300	1195000	1243800	1174300	1131500	1169200	1180600	1265700	1228800	1337100	1238500	1281800	1146100	1138500	1097100	1240100	1210000	1152200	1202600	1101700	1140400	1242100	1261700	1274900	1127700	1131900	1113100	1097800	1171300	1277200	1260800	1114400	1180200	1220600	1130500
870990	976730	1050000	824370	1085700	996870	978460	1134800	856610	1204600	1068700	1298100	856050	881730	635040	1156700	1118700	1254500	1327300	1159400	1132800	1241200	1262700	1238900	761870	1051200	928530	1026200	1226000	1152700	949720	1004900	1002900	1039600	972700	1036400	1091100	1049500	1056300	901400	1115400	990420	1093600	1082600	832910	975410	970940	1120700	1036800	1023600
73030	38588	138910	98168	81490	123900	48012	165390	152240	0	132540	0	0	28954	70960	20333	53214	70100	8010.7	31290	184440	168450	148310	38818	156730	128450	113760	141150	45264	54896	164140	150130	0	49098	30548	50757	78295	53377	104140	34085	21728	101230	133030	66647	43892	38629	111570	112080	63666	120160
14448	106840	57550	11762	63313	35845	22941	71061	51409	38938	8626	10808	13773	0	34718	63035	0	35159	37375	26488	30277	37312	27467	34212	43142	0	59067	20721	37258	0	50739	34744	0	14018	0	36409	25408	19761	11752	31852	36513	22112	9163	0	0	0	21995	51028	35121	30191
3100300	3746100	3746300	3807200	3697200	3642800	3521600	3478900	3593400	3650400	3745200	4014000	3914500	3797900	3883400	4017700	3955600	4026900	3813500	3562300	3904600	3641500	3659500	3759700	4096500	3870000	3875100	3521800	3656000	3756200	4045900	3717200	3966500	3744100	3824400	3752400	3620500	3783700	4076100	3511200	3791800	3464200	3989000	3775700	3889300	3707300	3575000	3732500	3641200	3745200
218850	261300	280550	275100	240850	266720	342390	306230	361930	331440	336600	334390	371280	291140	286870	290060	314980	414140	341090	247650	358490	276990	355010	392560	360120	378180	340780	278040	171950	253910	323790	288480	326290	264470	236880	171570	304330	230950	195660	240660	312650	201390	346980	267110	338990	242530	238670	0	309910	188890
0	0	0	0	0	0	0	0	0	0	0	0	0	0	0	0	0	0	0	0	0	0	0	0	0	0	0	0	0	0	0	0	0	0	0	0	0	0	0	0	0	0	0	0	0	0	0	0	0	0
1733100	1733900	1830400	1937700	1911500	1920800	2036700	1890500	1889000	1972400	1995400	1840600	1828100	1875100	1935600	2125500	1938500	2247600	1920700	1911900	1707800	1757200	1725400	1736700	2124400	1656700	2061300	2004800	1942300	1930700	1916900	1930100	1965300	2047300	1854000	1856500	1972600	2136800	2036600	1888000	1967600	1948900	2012300	2014500	1973700	1980800	2081200	2074600	1854700	1888400
545640	595450	664000	668110	716640	692900	662710	652410	617980	659400	633220	668560	578040	579510	520110	699130	581570	673220	761260	669060	773150	647820	701820	744290	636730	687190	628940	610010	611860	657120	588390	607840	615680	609240	572820	621360	647780	572260	642350	628350	658040	637140	631980	587920	606490	725350	594570	671320	578270	326350
439250	484080	497780	474870	366040	455600	316090	423910	402690	444200	438140	447860	541180	443410	493350	488090	483300	487920	446560	420380	410250	455760	369830	434840	446130	404920	467040	429220	459520	451530	420340	414850	450270	356420	386520	395420	300500	379650	432690	411140	407440	337850	392780	359220	363490	392780	336750	407800	399370	374260
328270	292640	124830	394070	452480	221090	303300	229650	316780	233730	369630	289580	468980	248070	645660	596970	533720	622950	166910	590700	357450	540790	166270	374760	460540	388390	385170	439430	459700	115000	289270	400810	378630	378760	321060	426350	452870	356260	462570	347570	244240	400590	466150	277040	217800	349350	392580	518760	331270	299760
58001	58542	59188	0	61106	67316	35361	21301	44700	120790	74221	53677	0	65144	61765	70812	70769	46790	28975	0	0	55005	62145	54961	36799	41176	71228	0	35994	51852	0	58433	0	57173	44577	36749	0	66880	0	68992	70534	64178	61794	0	42080	56226	0	56130	58712	56525
455740	900550	478210	609150	60925	864040	813650	403400	324270	678190	612360	636560	925520	888270	1008200	1107600	766140	0	0	0	0	0	0	1255800	632940	1008300	739840	1084200	215760	0	952140	661820	0	979030	892100	957320	160260	630130	1002800	1395400	927250	864330	2104900	323730	1042500	554710	236480	533530	203740	967720
936720	924180	985620	1089300	1049500	1150600	1008300	948500	959470	785120	668290	916530	1034500	1079000	978860	944480	1114900	1156200	1240900	1021000	775920	1013200	883220	1125700	895660	1267300	1185400	996460	986730	940200	1042900	1017300	847380	1081900	1232100	914610	1137400	1102000	988860	1113700	1007800	960590	1067900	1030100	1166200	1163900	1080900	942650	852690	941830
0	0	0	0	0	0	0	0	0	0	0	0	0	0	0	0	0	0	521460	0	0	0	0	0	0	0	0	0	0	0	0	0	0	0	0	0	0	0	0	0	0	0	0	0	0	0	0	0	0	0
0	0	0	0	0	0	0	0	0	0	0	0	0	0	0	0	0	0	0	0	0	0	0	0	0	0	0	0	0	0	0	0	0	0	0	0	0	0	0	0	0	0	0	0	0	0	0	0	0	0
66744	162440	181250	178240	193100	168980	134190	176390	183900	162790	160670	104840	156000	89794	130750	166090	199790	95075	178260	191930	135120	202160	188710	183740	50972	167410	191610	116540	93729	137590	120490	66054	121840	127750	79439	109860	216190	169680	137850	129870	183250	114720	90326	13154	151630	195720	172870	174870	72195	181100
243530	275990	331210	0	157700	363330	747180	383650	663000	244320	290590	252840	103650	118740	223460	143690	0	71181	256210	375030	357190	155740	255160	102070	298030	147220	534470	153400	125780	370010	319710	561480	370940	141550	79332	256670	167640	206790	229390	245880	411790	241690	292810	209630	221830	210400	251550	153740	280960	268330
0	0	0	36366	0	0	0	0	0	0	0	0	0	0	0	0	0	0	0	0	0	0	0	0	0	0	74230	139280	0	0	0	0	0	0	0	0	0	0	0	0	0	0	0	0	0	0	0	0	0	0
1250500	1342600	1413400	1315100	1402300	1472800	1257000	1209100	1304600	1367600	1319800	1293300	1226200	1349500	1436300	1532600	1493800	1452700	1238100	1272400	1443400	1507700	1469300	1504400	1357700	1407300	1414200	1377300	1331000	1448600	1236100	1186500	1286300	1229000	1286500	1320500	1270900	1364400	1365300	1248800	1506000	1451300	1272400	1276600	1431900	1343400	1242400	1380100	1143700	1166200
426530	429990	331780	386030	473830	474170	119950	242880	406890	307180	507230	608710	326690	119060	429940	279730	235280	433400	333500	476080	466470	134490	336270	331260	245380	210390	321100	424760	452570	366930	226240	431080	263110	486270	338830	388730	293080	315290	350620	284200	412200	244310	364920	292620	258780	252340	323620	398120	402270	199790
142690	117830	120240	170380	93720	146340	108660	132450	109400	152160	138150	110380	60791	120540	148180	128070	71166	99205	131650	109980	187200	126620	93984	167460	66496	129100	103410	127890	109110	136550	109480	115990	122940	109860	102410	95209	107010	42296	107930	69241	56851	103390	53533	74304	115260	127660	85877	93203	131420	153820
0	0	0	0	0	0	0	0	0	0	0	0	0	11868	0	0	0	52688	0	0	0	0	0	0	0	0	0	0	13430	0	23451	0	0	0	12354	18945	0	0	0	0	28293	31921	0	28589	29239	17821	0	0	0	0
890060	968640	763010	1059500	955110	979860	1029500	1050300	1029600	977670	1061100	999450	1231400	930170	949810	970090	1064300	1180000	1005000	930210	1008400	1080100	862570	961860	1062200	1096300	1148100	1066100	1050500	882460	1269600	949960	950020	964080	735860	946920	986880	1052400	1044500	888430	869210	1005800	1000900	919930	988520	916780	774240	945050	950930	982490
185490	316710	291320	287140	264810	278330	335280	267740	214230	285120	313700	190970	286610	288930	169190	353520	346870	318270	243200	326700	280150	281870	310880	204830	145650	230630	236250	299270	224700	259500	207730	301020	300520	189870	120310	264960	190450	300340	273010	270380	298300	296440	191930	224250	279330	247850	229610	201130	152260	155900
51291	48524	41715	86731	100920	0	181760	199550	15331	50565	99578	0	0	0	51902	96262	100500	0	224810	95570	0	116420	73966	63297	34220	0	0	0	96047	134330	69971	0	92130	0	0	69152	86026	63016	0	0	0	0	0	0	0	0	89137	57688	61899	0
0	0	0	0	0	0	0	0	0	0	0	0	0	0	0	0	0	0	36464	0	0	0	0	43828	0	0	0	0	0	0	0	0	0	0	0	0	0	0	0	0	0	0	0	0	0	0	0	0	0	0
942440	953790	1082600	1041500	945220	987690	1115100	1062100	1126200	1021700	957760	1179500	1156300	996230	1127500	1057100	1005100	928920	977220	1019600	1032000	1065900	1013400	935700	1166100	1102400	1118200	1083600	999270	1048200	1053300	1176200	1104400	924180	989320	930950	1210100	1014700	1032700	897770	1018400	1105100	1108700	1002900	1080000	1112400	1117300	1024900	1049000	997550
0	0	0	0	0	0	0	0	0	0	0	0	0	0	0	0	0	0	0	0	0	0	0	0	0	0	0	0	0	0	0	0	0	0	0	0	0	0	0	0	0	0	0	0	0	0	0	0	0	0
477560	572210	478460	443720	571390	476630	520920	532830	501660	512820	523080	572670	563020	468170	436510	452840	439200	564700	535190	515760	613360	584650	524680	515560	401340	524910	607530	452860	381420	498290	517930	482750	538250	451550	555860	361550	459720	551390	630320	509420	550580	392660	494290	498550	550030	507960	461310	477710	463110	444120
0	0	0	0	0	0	0	0	0	0	0	0	0	0	0	0	0	0	0	0	0	0	0	0	0	0	0	0	0	0	0	0	0	0	0	0	0	0	0	0	0	0	0	0	0	0	0	0	0	5191.3
2016800	2394300	2357600	2198400	2194100	2174300	2464000	2342200	2429300	2518300	2404300	2410500	2586400	2656300	2601100	2440900	2445900	2388600	2711300	2733300	2764200	2274500	2557800	2576300	2644300	2517900	2564600	2169100	2164200	2123800	2610600	2492500	2514900	2316200	2142400	2320200	2529300	2502900	2590300	2420300	2447100	2340200	2787100	2581200	2801600	2465200	2310300	2432700	2494700	2507800
94192	30505	93244	10365	31984	159430	15605	41464	119850	61080	32924	62549	53309	82470	89828	122100	136370	126220	26620	47963	182530	87030	120290	33472	82188	0	43909	97795	125050	80438	84508	73103	134070	78424	66605	27479	30829	58675	134300	36811	33507	33665	126730	0	41630	106600	0	45869	72020	21507
78596	165420	189050	34489	0	23836	45221	100540	16319	79975	41672	41926	102200	149790	106470	170860	69163	98429	87174	46474	66032	82520	81825	140410	94457	102330	95503	73468	80048	125480	47021	91727	115990	82778	103510	47650	75664	48065	59024	64046	76620	139310	88786	108420	51447	62960	77530	0	17385	85976
100610	0	82177	74710	138500	90303	163920	96343	0	68863	82808	0	68776	66100	52912	0	0	39220	0	81048	0	0	0	58843	0	87877	51462	114920	0	0	176380	0	0	0	96562	0	103350	70426	0	164630	0	99430	51048	112550	46982	103540	80173	91086	41068	87072
455450	694590	506140	522860	546950	579920	718710	600800	529470	582790	568650	577690	542000	551800	635750	523330	500400	457080	674380	687610	584160	687850	513480	436840	508480	497970	733180	586150	672580	615200	787400	355490	632390	720630	736930	660240	705400	630570	607260	572900	606650	572260	736410	572390	733170	673680	621840	746620	677620	588170
141640	149750	38367	191870	195880	163060	86269	33758	130230	154810	114160	66256	89206	72037	39501	121300	29692	59804	47926	114720	90287	101230	133100	102220	110400	55273	124880	73406	151430	74881	150110	184680	117650	120320	166800	108270	147740	103720	132430	124320	146420	127990	101910	73500	147730	72375	140220	165090	28648	112850
324770	339090	317780	378880	388050	361000	365970	345140	382810	373240	383650	387710	297870	276310	304000	195790	210530	257650	284760	275360	223340	277940	245560	173330	288220	270230	274920	312720	286950	314040	325170	328880	344170	267300	355430	331690	236330	136100	345160	317990	34428	301870	323790	314180	335180	347040	335460	313380	352810	286390
130360	26338	61550	120370	58849	34384	132150	78300	71334	122930	79044	188410	200640	75879	59189	31793	124470	42459	168750	93925	55221	126810	86937	78168	57079	42581	59747	78108	70327	79286	126060	118320	75057	89854	117710	30578	231790	122840	132350	203320	16488	117980	54931	51252	39252	61674	116680	58046	388700	96962
0	0	0	0	0	0	0	55000	0	0	71797	0	0	0	0	0	107950	18791	0	92288	0	0	0	0	105230	0	0	0	0	0	0	0	0	0	26319	0	0	0	0	0	0	37644	0	0	0	0	0	0	67838	52034
0	0	25396	0	11460	0	185020	64169	82589	73126	785480	102870	0	36569	32203	0	34944	18310	0	8047.8	0	0	0	0	0	0	0	39904	22776	0	79421	14350	27588	0	0	30900	0	0	0	0	15807	0	17222	46830	31900	25161	91514	87607	0	19681
0	0	0	0	0	0	0	0	0	0	0	0	0	0	0	0	0	0	0	0	0	0	0	0	0	0	0	0	0	0	0	0	0	0	0	0	0	0	0	0	0	0	0	0	0	0	103270	0	0	0
0	107380	0	58090	22321	58388	0	44179	0	77382	0	33911	0	0	0	0	0	0	32390	180360	0	82731	51763	23741	0	0	0	36238	66112	0	24295	29326	88760	177010	53551	76590	32792	0	143740	44686	0	80352	0	42645	0	120350	59900	48255	77117	75381
1695700	2059100	1867000	1945300	1822500	1935700	2123500	2059600	2145600	2133600	2001000	2055400	2120000	2122900	2024800	2027800	1975500	1917300	1922800	2110700	2062700	1998300	1924100	2259100	1969700	1958700	2015800	1855800	1938500	1810600	2043000	2091900	2078300	1910200	1818800	1826000	2114100	2172800	1983000	1969800	1978500	2054000	2159700	1961200	2222200	1819200	2008800	2097200	1985300	2085800
164870	163490	239040	166920	180240	246640	213750	153510	185200	0	200690	218470	198810	235000	208740	241540	269000	282680	242660	227250	260770	249430	208420	279290	239630	233740	0	219490	0	193090	201870	164340	205530	221810	200790	209890	0	0	155810	186070	76051	94549	239490	173640	195620	207220	208350	250920	179770	176350
91261	25982	0	44061	0	141000	0	42210	101310	190120	104180	0	0	0	0	222600	92188	195350	29307	0	178570	129430	203000	75585	277280	102770	0	0	0	0	0	0	43120	165110	0	60442	0	0	0	50639	0	0	115730	0	118820	142060	0	0	123960	62195
93030	96573	133310	27899	31971	79108	78152	95210	65779	93015	83138	99718	32391	107980	0	87218	81028	76443	83615	82519	101920	95610	86517	105780	0	116280	0	122060	74914	75746	0	72402	83107	70430	64606	66610	0	84894	53631	28083	0	94380	77555	55392	85783	35503	0	62230	0	66959
2909500	3562600	3477200	3708800	3507900	3552500	3756500	3577600	3718500	3620400	3706700	4042700	3699600	3314200	3710000	3894900	3621800	3936100	3870100	3679100	4034000	3656700	4026300	4220300	3997500	3777200	4069900	3475100	3334800	3465700	3608500	3497400	3705900	3266800	3126100	3316400	3585700	3537700	3706100	3931400	3683100	3566900	3638400	3583200	3476100	3383000	3319000	3630700	3628200	3288100
173010	69183	33745	82755	184970	147260	137820	68165	167340	227640	198200	49507	188300	86065	44100	117260	93160	63021	77832	137580	159400	148640	63572	92568	164440	132270	143120	142190	85823	61726	168740	88089	165270	100900	62606	193860	36422	130600	172910	118110	35717	111280	222980	71833	133040	211130	131960	136280	106120	82213
459440	384320	321240	358200	416720	317510	379740	331320	363620	358410	359140	406550	328320	425040	474610	304910	297160	358910	464350	456250	491670	330200	433150	437850	397610	338550	370900	315620	339350	338760	386010	367980	360860	310650	143370	328480	265160	355140	318130	358580	423830	337890	313980	384700	380590	396100	305420	377540	323730	343950
0	0	0	0	0	0	0	0	0	0	0	0	0	0	0	0	0	0	0	0	0	0	0	0	0	0	0	0	0	0	0	0	0	0	0	0	0	0	0	0	0	0	0	0	0	0	0	0	0	0
442190	531420	488210	526740	462280	451670	465440	478420	497090	497150	497570	538760	515340	512350	483590	580060	486080	498670	502000	463920	535650	456100	451460	481800	529150	501720	503460	536310	496880	494390	477640	461580	458120	382640	412240	369610	476740	499790	524620	494180	553710	510120	474720	440670	492710	519340	406030	487870	385230	473300
42458	0	91402	46489	43454	0	0	55223	53270	16995	0	0	35697	80600	0	0	0	82043	55787	67137	251300	103040	63067	0	38625	0	30746	0	0	42403	0	0	0	41577	48481	0	34057	0	0	108550	0	0	96470	0	0	0	0	33772	0	0
0	0	0	0	165320	0	0	0	0	0	0	0	0	0	0	0	0	0	0	0	218130	182360	0	210280	0	0	0	0	0	26134	0	147450	0	0	0	0	162460	0	0	0	160180	0	0	0	0	0	0	0	0	0
1136400	1288000	1415400	1297600	1304000	1285700	1565900	1273500	1294200	1298900	1317800	1450700	1615100	1501400	1481100	1656300	1470700	1364900	1433800	1555500	1529700	1444100	1483700	1454700	1594300	1657900	1555300	1290300	1331600	1306200	1236400	1380500	1567600	1273000	1396400	1228700	1500900	1360100	1605700	1411400	1302800	1368200	1511800	1370200	1461300	1493600	1468600	1362000	1303400	1388800
460870	511040	565840	594900	618670	610280	557760	528380	494850	502080	479250	609870	537520	486250	535130	600290	520900	754530	565460	522640	600160	476030	529570	511190	487140	571540	656700	485850	628610	442160	467760	463700	479390	414910	411340	383080	545820	442210	549590	565830	513970	539500	398710	407970	412160	419800	425730	469300	495000	497870
88367	34965	62945	148020	76117	0	125850	38375	131860	43900	35815	54384	97344	75107	227610	104810	60113	11455	0	75732	6414	86738	121810	33946	100210	63106	101890	89946	78753	94375	27587	34555	49548	35290	25778	19830	65722	103120	79654	85427	60308	108870	106010	35343	32401	119500	54961	40851	87833	161700
4190100	5399600	5982200	5418500	5493600	5461800	5591000	5919900	5436600	5373800	5000800	5001200	4678200	5592200	5240600	5859600	3571100	5811500	5625700	5069500	5466800	5536600	5977700	6059400	5404600	5320700	6153600	5078600	5020600	4763300	5347700	6391600	5243200	8438900	8547800	6748200	4809000	5171000	5266200	4842400	5392400	4892400	8856600	7686300	8447200	7893400	6539000	8639200	6246100	5393700
168680	92790	113320	201520	211850	202630	151550	73211	71479	192330	122670	118370	230100	169930	140970	57581	176720	174830	60501	101680	29191	234740	212150	123900	109810	187320	185190	83153	140270	120540	150070	200990	296790	279750	55833	187920	56689	87746	151620	54211	185780	72800	215190	201510	248970	76450	188310	109140	190200	141180
692990	528280	665150	562570	434750	901170	356620	596460	560770	408490	636110	355590	875580	696660	564840	570700	436500	492460	182300	309810	788710	305330	234550	320660	659520	462270	38202	239350	584360	636990	607440	824810	905310	613580	1098400	273450	457660	478110	618630	736920	477850	283830	792690	629750	658690	577740	633870	663680	293480	199170
753460	881050	1079300	920000	663360	963070	951380	905430	995880	663420	963000	770270	880010	798930	829620	903000	710270	807740	765060	847220	1024900	859260	927950	677730	771570	829040	1035700	809940	888940	700850	801030	639460	806160	633030	702430	896840	687270	829160	766410	586410	959960	875250	990880	925150	827740	792220	1027200	738770	937460	766720
27576	33226	38210	26542	32138	33291	27452	27568	0	31415	0	33757	33519	29811	28297	32635	30404	26660	32967	26026	0	27628	31659	0	0	0	20806	0	14631	0	0	29553	0	29043	0	9139.7	0	23573	0	27845	32488	0	0	0	0	26794	0	15008	0	0
502600	590560	522160	556460	712610	614240	599150	552000	591270	642090	528230	670390	554230	588160	653370	840540	680200	903740	711370	732350	624450	600750	872780	746140	547720	582360	682330	609960	773470	696180	387590	556860	618130	629220	589200	502770	673520	600170	684870	649070	685020	540180	493070	491030	612450	551340	642150	533770	674720	524420
199550	118340	201560	123720	223950	222860	209990	110600	207030	226740	185170	234430	200790	203420	219680	243350	177710	188840	238490	185060	196020	188150	215420	240410	84578	160660	147160	169680	171660	239890	223120	137890	172510	165860	176480	211750	175730	186720	243010	228480	227930	206010	202180	201350	174550	212350	95633	252720	205690	159320
175020	285360	225510	211680	220780	163330	220630	223880	191410	257640	181230	223740	217380	197440	204590	198450	168050	203300	276190	201190	260830	247820	213600	205860	251750	213040	206750	199130	165330	181760	195370	48087	115620	177390	163600	152860	159470	84619	271280	192120	204340	260060	200380	265970	211920	201890	134700	233470	84157	125260
22175	46593	89506	237270	241070	190790	222900	0	221390	19048	114290	269620	50624	98170	115890	54208	121590	203960	12222	12460	9164.6	132920	139550	185940	0	76676	83021	135150	107270	82626	0	24532	66807	143960	98651	39371	46460	13831	99364	113300	104200	106840	63430	98377	69110	80144	82880	178380	0	194690
0	0	0	5464.5	9032.5	0	0	45077	0	6125.2	0	0	0	0	0	0	0	0	0	0	0	0	0	0	0	0	0	0	0	0	0	12505	0	0	6120.7	10656	17652	0	0	4321.7	0	0	0	13971	19894	0	11346	0	0	0
71398	49714	56207	47516	49067	55949	19124	62346	16557	0	0	58478	0	0	30144	55358	58061	105540	0	62514	0	57001	67118	44369	59279	43100	74202	62412	50077	46506	41047	0	29258	68291	49446	52817	82444	48434	0	68359	41129	92552	39871	0	88230	58906	36838	53709	56293	45705
283410	332000	319800	296460	311610	305000	298580	319360	281880	263690	308370	313080	308110	335220	355070	342640	300660	338540	327560	313510	334220	297180	164010	332350	333920	319160	331620	243370	306910	270300	287060	297230	328690	116590	244690	267150	331680	275310	270590	303760	288300	292970	280850	263510	327820	286690	278300	307470	308420	290400
783170	896140	1041400	1076900	909020	1041500	1224100	1117200	1106900	888280	1101500	1162400	1188000	1023300	1125000	906480	977400	1099700	926080	884380	1076700	1145700	1149700	1167800	1090200	747530	1176800	981050	1001000	958490	1139900	1134500	1106500	1008400	933660	1016600	1056600	1004600	1093900	958680	1115500	999690	1158100	1028300	1043900	1095300	982570	1059400	993730	1074000
682050	887800	626910	806970	859210	814900	1096900	1011700	963740	791360	819810	838740	1053400	973800	1044000	917450	1006900	1094400	959000	1056700	881390	1028900	742960	572680	1047600	995440	1244800	1021100	786210	846410	1050700	1024000	1006200	865480	761210	885880	832820	1035400	843850	820420	868430	791190	1061100	524090	1137100	964030	927650	1186500	1019200	497600
58505	101240	18956	71120	67634	55845	21806	38370	113650	33342	78079	83406	0	12577	8549.8	69849	0	129080	135320	70790	51835	137980	83657	101790	100670	0	76653	185560	0	82063	105130	58951	96554	0	23542	0	27658	77753	39089	30277	15079	13639	22287	0	22405	0	92240	43130	94716	39373
0	0	0	0	0	0	0	0	0	0	0	0	244740	0	0	0	0	0	0	0	0	0	0	0	0	0	0	0	0	0	0	0	0	0	0	0	0	0	0	0	0	0	0	0	0	0	0	0	0	0
6740800	7778700	7498000	7728000	7718000	7645300	7483600	7549000	7727900	7790400	7271800	7437700	7701800	7763400	7925800	8211900	7491800	8140200	7922400	7580000	7660500	7649000	7247300	7517300	7695800	7989700	7534700	8255600	7786300	8015500	8187700	7765800	8170900	7691400	7757700	8510800	8164700	7811600	7579200	7757300	7877900	7784500	9262200	8347100	8697200	8051600	7976400	8333800	8306500	7412400
10390	102170	140410	131070	82721	96185	98240	94691	105240	83002	71892	104810	90267	60159	102100	130300	40458	120970	145750	140110	98507	100630	102660	93296	118510	83635	94174	58479	41081	106110	102380	96594	18184	71949	94785	123010	131300	74020	15860	167460	46352	33079	73326	46674	121540	122200	90775	120550	86242	66942
13811000	16137000	15504000	19235000	18636000	16401000	18475000	20608000	18380000	17879000	13744000	15448000	21950000	23112000	21128000	17901000	18292000	17331000	12398000	12567000	13228000	15561000	17405000	20022000	19052000	19142000	21668000	19659000	21807000	22021000	17951000	17599000	18482000	22557000	25493000	31947000	16128000	15746000	15353000	17381000	19803000	18046000	35324000	27105000	32902000	26556000	30758000	30540000	20586000	18936000
0	0	0	0	0	0	0	0	0	0	0	0	0	0	0	0	0	0	0	0	0	0	0	0	0	0	0	0	0	0	0	0	0	0	0	0	0	0	0	0	0	0	0	0	0	0	0	0	0	0
5345800	5874900	6031100	5673500	5231600	5551300	6260100	6392700	6924700	6664800	6942900	6661500	6961700	6638000	6635300	6116200	5516500	5828800	6523600	5541700	5694000	6619300	6494800	6818400	7313200	7153300	7264000	5896500	5983200	5666900	7203500	6790900	7126000	5463200	5687200	5653600	6687100	6540500	6781400	6342700	6302200	5959400	6776900	6737800	6799800	5881300	5838100	6337100	6596800	6658100
522180	603220	540650	622830	475790	611040	628410	511240	696570	676630	661170	716630	715590	542610	451130	759400	634830	882610	856340	658320	716450	839680	902720	969490	894560	528730	870860	462750	760250	626930	754350	506760	807080	688240	591580	397000	673850	725160	580810	747280	552350	456950	590220	527070	482670	430500	703350	401470	798140	657270
0	0	0	0	0	0	0	0	0	0	0	0	0	0	0	0	0	0	0	0	0	0	0	0	0	0	0	0	0	0	0	0	0	0	0	0	0	0	0	0	0	0	0	0	0	0	0	0	0	0
294800	278890	248070	249350	329100	290080	98919	355830	57256	115960	234420	123450	139920	90703	81767	194310	271280	252580	104580	219520	45243	519730	61614	35277	230210	329870	191860	91575	397560	398880	202640	127320	34189	261730	237760	366680	91982	123150	232620	267540	182810	217990	218130	281340	73271	309070	157350	224950	161300	60562
325620	294220	335810	250650	252830	330950	298760	339210	350830	324920	274690	303260	264320	359560	270780	336700	288410	377050	228470	291490	292640	364220	300960	304120	284920	353900	369270	355620	271230	347890	348200	327750	241070	350570	282000	231040	363910	382530	328870	306580	292980	366740	264420	247040	334330	266460	261390	343630	275780	339070
2462400	2661700	2785900	2458400	2514200	2641200	2863400	2896900	2943600	2921100	2626300	2741900	3102000	3300200	3288300	2842700	2982300	2957500	2725000	2840600	2580500	2795800	2787300	2822000	3421000	3288800	3557800	2899200	2851700	2763300	3097600	2967500	3102600	2915100	2771200	2851700	3089900	3215300	3146600	3002500	2792400	2775000	3065800	3106800	3027600	2909500	2696700	2853700	2981800	2768100
0	18183	0	0	0	0	27773	0	0	4626.7	0	0	0	0	0	0	0	13710	0	0	0	0	54541	0	29844	0	0	0	0	0	0	0	0	0	0	8429.4	0	0	0	0	0	0	0	0	0	0	0	0	0	0
9315000	10687000	10358000	11007000	11140000	11042000	11416000	11404000	11880000	10854000	11142000	11157000	12665000	10723000	12116000	11585000	10495000	11983000	11586000	11904000	12165000	11354000	11128000	10778000	10619000	10732000	12171000	10934000	10852000	11630000	11476000	11599000	11239000	12255000	11818000	11935000	11493000	12633000	12475000	11770000	11893000	11470000	12212000	11597000	12723000	12236000	11095000	12043000	10589000	11532000
2842500	3781800	3669600	5164700	3779200	3100200	2765100	3264900	3569800	3314400	2981500	3772700	2991500	3453200	3797800	3555400	2859400	3483900	4484800	1726300	3870000	3070400	3690400	4441900	3784500	4060700	3417700	4178700	3230400	5348300	3803800	3813400	3658700	2705800	3070800	3401300	4103300	3686700	3104400	3477900	3360700	3209300	4598400	2959200	3832900	1761400	4583000	3285700	4103700	3390400
750380	783880	663670	598820	751910	673250	1639300	1846500	1983400	2295000	2202700	3091600	778540	747870	935630	783430	1202500	1577400	989830	541830	988640	720990	538750	915420	775260	813670	924080	1124700	1252100	1153300	806550	711180	979080	1180900	1051900	1038600	598810	558520	660290	728350	756430	913490	1183900	1188900	1124100	1085400	930610	1123900	905310	746460
48049	117420	103920	114990	81725	68846	151630	142240	139350	36185	131820	48152	77718	120140	43641	39428	118420	87638	75745	87057	44800	81192	77735	107710	131890	144300	119300	26489	114410	113380	110990	105300	163710	104850	122470	123260	37845	119670	42488	62878	139640	92263	152760	122140	115960	106300	96112	85404	97237	139870
667220	639770	686250	706670	725980	630780	646750	646710	646720	617420	655570	657970	650940	535890	563050	562660	650770	750060	514440	536880	616600	605530	605370	595790	639420	622630	598360	676200	791700	668260	417400	527960	639570	549730	599300	634500	696710	694040	738190	672120	617470	687580	624160	538200	560140	608150	519850	655440	669200	640370
0	0	0	0	0	0	0	0	0	0	0	0	0	0	0	0	0	0	0	0	0	0	0	0	0	0	0	0	19345	0	0	0	13902	0	0	0	0	0	0	0	0	0	0	0	0	0	0	0	11288	0
125930	57278	76431	147230	103860	100390	101660	103110	102360	51482	123350	124660	52452	64636	133240	133250	145580	168350	134560	138840	40349	142930	156780	92537	79805	66296	132630	16613	143400	121680	135750	128710	154780	67903	200930	110590	118490	150660	181780	100330	103760	129090	139640	134250	113230	21654	119610	127870	108740	77693
0	0	0	0	0	0	0	0	0	0	0	0	0	0	0	0	0	0	0	0	0	0	0	0	0	0	0	0	0	0	0	0	0	0	0	0	0	0	0	0	0	0	0	0	15320	0	0	0	0	0
12413	62813	37579	33137	58490	17748	45185	37645	43946	57731	55031	49926	41966	22038	83921	41283	54367	0	36407	14824	0	67405	89684	8857.1	46730	34465	37836	21999	7454.8	22620	38454	22694	16978	0	0	24232	36834	72323	0	33545	0	0	73975	79226	38606	26594	0	17287	12803	21749
4852800	5446100	5433100	5457200	5143300	5301700	5343900	5415700	5484800	5556000	5163600	5352100	5720100	5524500	5481000	5770700	5476300	5721000	5947700	5701600	6230600	5404900	5321200	5347400	5731200	5466300	5870900	5462000	5256200	5273700	5617900	5657600	5501000	5503900	5149700	5482600	5646500	5646900	5724700	5574700	5721000	5401400	6142500	5771000	5758500	5724600	5472100	5689400	5607400	5357600
4300800	4572400	4996300	4796700	4635400	4757900	4873200	4808600	4971200	4855900	4932500	4916500	5503300	5130700	5337200	4848900	4534300	4843200	5054000	5213800	5739900	5079900	5084300	5169800	5053600	5034500	5387000	4441900	4578000	4413500	4960500	5123000	5330200	4639400	4261300	4780000	5155000	4972700	5101400	5185900	5076400	4907200	5323800	4873300	5434100	4965500	4611900	4689000	4991700	4743100
159370	168120	154840	111090	124330	54007	78117	176170	108510	64110	52452	117310	65213	109590	100030	75131	17399	36195	130230	104180	146590	49275	85477	172330	39445	57430	28584	78333	72231	188020	39953	31197	38531	88154	75412	94224	103370	50942	140970	178130	34001	45482	159740	147260	56141	21651	76031	131220	174250	111670
53938	83650	109560	86411	79825	116860	80195	72649	89989	80338	91936	112070	134110	50163	20078	51274	98693	55374	103410	75245	51095	51697	84484	56540	97770	117950	50856	58417	59346	103200	26258	124020	82142	75795	59606	0	120630	124830	89055	81685	65837	62597	33442	51639	85542	31390	65084	216000	76175	79482
187.75	861.8	384.24	608.35	126.12	239.31	817.12	207.18	873.67	355.13	1800.7	366.42	1025	1236.9	389.61	355.51	471.61	721.74	933.3	319.92	528.66	2063.9	297.68	502.01	419.76	270.58	771.86	264.61	2053.8	382.03	1104.7	1595.2	0	287.32	342.5	339.9	4473100	5377500	4227600	0	340.41	203.4	879.15	1609.7	162.81	379.7	226.38	265.64	193.57	318.42
24162	51119	59571	7618	124230	22349	87934	129850	78788	64412	23265	80107	0	37061	117050	34474	94132	69389	16973	72524	12801	66801	40729	148740	127050	109210	40260	34979	84665	54444	23889	0	0	62058	59863	20205	0	42065	79806	70837	171020	169980	72653	61575	20187	0	81141	42274	49655	115650
115400	197580	103040	54719	118670	110590	76648	227790	250280	110210	0	47971	83382	0	155420	269250	120290	75463	124860	87963	105930	301240	205270	66656	205730	101690	310680	224640	204120	71914	236480	0	0	0	206340	257070	126570	79712	0	68143	0	0	237300	92772	233260	116180	94897	307110	238260	92034
1221400	1400200	1500600	1634900	1531200	1631700	1466200	1355300	1443800	1614500	1466300	1585700	1430600	1398700	1455800	1541100	1552300	1778800	1173200	1317800	1513300	1435800	1523600	1539900	1500200	1471600	1573200	1614300	1686100	1686500	1472500	1361100	1483300	1413400	1414900	1122000	1508400	1589900	1702300	1563000	1741900	1501200	1600100	1352000	1678200	1645300	1523200	1486200	1310000	1320300
141990	123560	121160	103300	87433	126170	131020	97007	120690	119450	61831	162790	65881	172030	101240	71102	101620	97835	140380	121650	202590	113760	132460	75964	66307	98424	127410	166680	128010	168860	81899	101710	82601	106550	144360	118410	147890	136860	162560	162150	159980	155730	115680	115400	96678	180430	166080	158470	113950	89930
572280	524880	648450	621730	657440	655760	612140	685160	597300	566900	653640	621540	328840	636090	593310	613610	642020	563840	680330	650840	642630	706690	664690	756530	573030	674370	562520	680700	616180	584880	594900	519270	477130	608670	466230	628400	546150	591210	450220	616530	559820	559970	564260	624080	416680	506580	537230	539270	478260	603480
573970	580240	615940	593230	668070	722970	678390	661180	772370	807510	749790	681940	698120	586050	725000	752360	774840	707610	632950	512050	673930	592050	631310	696370	678350	638380	714350	714020	702120	631450	702720	531410	569810	578380	612310	768600	671670	708370	848100	681380	721840	645850	692340	604820	673130	691700	718010	734760	641700	594340
565670	712110	713780	694040	696020	755440	746820	707850	700320	739750	778070	699020	811260	675210	683240	985450	708440	889950	701330	642170	931840	583720	837320	735820	779050	741790	671770	721260	666330	762430	697720	692500	703740	812020	651320	618160	724330	670310	685230	730360	797100	613560	623970	715220	752600	736210	750340	734140	724270	730930
168050	200260	155700	92694	205370	152840	177400	198780	155000	160730	162710	199360	189820	235850	203820	206710	220650	213720	205400	149970	187230	164000	157600	147700	145270	183660	234550	140460	222980	69572	190470	278860	199240	56330	180550	178170	209910	184840	132000	139290	187880	134450	157360	200810	215830	168470	182410	158910	221250	196570
10550000	11831000	11761000	11289000	10948000	10596000	11919000	12269000	12416000	11949000	12112000	12295000	13332000	12863000	12451000	11659000	11596000	12188000	12082000	12718000	12205000	11678000	11821000	12728000	12916000	13212000	13315000	11323000	11429000	11670000	12513000	12458000	12325000	11422000	11621000	12049000	13042000	12908000	13507000	13064000	12061000	12455000	12678000	12267000	12949000	11861000	11809000	12195000	11704000	11710000
124260	25762	7549.4	70883	9066.1	0	142340	135040	0	75071	9544.5	68484	114490	23013	46654	118660	43102	0	33898	30633	0	24318	28384	15460	63967	47473	190300	67314	56396	33895	58628	20525	57036	31688	99302	10383	144310	27237	53940	42088	20186	104050	11172	10201	20640	0	0	0	96979	39461
304030	392950	431600	425170	419220	501670	514040	563960	417950	437080	431690	370590	428610	374840	434200	467800	431390	374750	478030	446150	506300	390240	554400	505350	487940	565140	431880	489590	347820	392430	373900	466800	363720	492560	505040	426840	423150	446240	437900	426100	476950	514220	511840	473120	428510	556800	434840	521990	400510	446830
34962	98178	106430	47573	101040	123620	17398	72674	69836	19266	99680	0	30645	36099	24087	44288	136450	129810	48686	118710	129790	123850	123250	107580	99621	38348	37974	38645	37257	59902	99819	98326	113510	94185	0	102620	96782	71666	72258	107290	50620	25284	85456	81853	99969	97453	93893	91233	61611	12813
1058700	1389900	1325100	1284600	1228200	1258300	1172000	1380400	1303400	1140000	1242300	1280700	1166300	1245400	1384500	1326500	1217600	1233000	1434500	1514100	1544500	1233000	1513700	1589200	1457900	1199500	1367300	1308900	1358900	1465700	1106500	984760	1160500	1021000	754370	1145500	1408200	973950	1236000	1092100	1337100	1097100	1019600	1224800	1239600	1230500	1177900	1297900	1241700	1136100
24261	60596	55958	27907	40336	114040	76260	70026	59097	44556	0	55191	37892	96527	113440	33092	62955	81251	142000	45821	86237	150380	56131	22667	59835	45673	54581	73447	49523	30899	63194	78739	88010	44010	98122	0	33877	38875	0	29033	44818	60904	144900	65072	64485	35349	21596	21297	77907	60189
483550	556210	686230	492000	557410	467270	444730	488110	235340	315320	426570	466250	412000	467570	499630	616640	576540	499280	581060	494800	798050	554060	411420	524080	199960	540220	526930	484930	456500	345500	377150	423920	549580	492940	438940	444850	508360	466650	509900	648880	425900	527530	308730	349360	406550	424190	515080	572320	382840	500920
472770	500200	579170	483180	523200	509580	490780	546840	524640	537340	507440	540870	573610	524180	572100	526830	585890	606550	538100	472920	629120	390610	528760	563600	396090	524600	645910	514220	510580	525190	535460	531660	540460	500600	431510	493940	545580	513200	628120	541040	494760	561330	533950	553670	579650	530230	503200	444600	544970	515190
28760000	31671000	33440000	32482000	31550000	30379000	34128000	33117000	33519000	33019000	31818000	31304000	35614000	36727000	36865000	32302000	32975000	33981000	34677000	32109000	35949000	34344000	34396000	35490000	34073000	35616000	35996000	32443000	32201000	33375000	36136000	37042000	35023000	30753000	33253000	34674000	35256000	35287000	35919000	32486000	34117000	31342000	38787000	37066000	38803000	36413000	31738000	36630000	34625000	33990000
189540	230060	272130	145250	246330	208170	206760	202550	233810	229360	292250	213310	141550	141740	170520	254770	217800	265640	86536	154580	160460	195930	101650	66502	124670	161030	120430	256640	174270	235590	140650	189660	101470	206800	175810	197540	239770	126570	223750	204370	267360	201610	213760	116430	266250	258040	193780	278600	193420	198470
5952800	6294600	6936500	6763200	6690800	6629500	6715500	6495900	6631600	6854100	6818100	7000900	7125400	6818100	7217300	7100900	6958500	7238500	7283500	6510000	7235400	6399400	6300700	6753600	7196900	6992300	7263900	6957300	6751600	6849800	7327600	7218000	7811800	7021400	6940500	7120400	6895000	6825300	7002700	6544000	6802400	6901200	7453600	7308200	7924600	7192800	6666100	6796800	7007600	6863000
40831	77777	30875	0	26954	49478	0	0	0	0	0	0	0	0	104310	0	0	0	0	236910	74078	0	0	0	0	57592	0	0	0	65322	0	0	0	0	0	153310	0	56305	0	150940	0	0	0	0	0	0	103300	0	264510	0
0	0	0	0	0	0	0	0	0	0	0	0	0	0	0	0	0	0	0	0	0	0	57572	0	0	0	0	0	0	0	0	0	110070	0	0	0	0	0	0	0	0	0	0	0	0	0	0	0	0	0
0	0	0	0	0	0	0	0	0	0	0	0	0	0	0	0	0	0	0	0	0	0	0	0	0	0	0	0	0	0	0	0	0	0	0	0	0	0	0	0	0	0	0	0	0	0	0	0	0	0
3138300	3791700	3677600	3764700	3584800	3521200	3271300	3256900	3446900	3539800	3547300	3247200	3760100	3715200	3665900	3958000	3810700	3867800	3479200	3482200	3360300	3503100	3493100	3546400	3662200	3476800	3551700	3953300	3683300	3762700	3825800	3581700	3545000	3720700	3450000	3841000	3646900	3126100	3337400	3549600	3399100	3323900	3765900	3512800	3717400	3627400	3505500	3565500	3788200	3430500
493760	554390	48777	451420	492840	536460	537100	493260	524870	588250	545260	0	453970	21399	531350	631360	652640	565920	432760	463230	611450	550350	552850	545110	635260	247030	545180	557830	490450	540400	482860	592390	571820	588390	518890	631670	616410	570560	0	672140	550090	559840	706520	577360	589090	634300	570820	0	539160	563590
5350800	5719400	6021700	5936700	5760600	5661100	5956800	5888000	5864000	6080400	6058500	6273500	6076600	5667800	6130200	6572500	5616600	6326300	6777200	6499200	6909800	6071600	5897200	6583700	6227600	6334500	6347000	6027400	5581000	6121700	5974000	5767000	5966700	4991900	5244700	5739100	6520200	6507000	6630700	6240500	6370200	5987300	5951300	5654200	6037100	5423900	5001500	5474000	5949300	6074200
7413700	7797900	7819300	7088400	7803600	8132800	7759000	8056000	7884200	8044900	8006700	8159000	8509800	8026200	8339700	9046300	8848000	8839600	8040400	8031800	7866600	7797900	8118700	7952400	8596300	9284500	8814000	7730400	7435500	7604000	8488200	8027200	7869500	7629700	7895000	8339900	7624400	8091500	8874200	8416800	8847400	7823900	8690900	8183800	8768400	7944600	7826700	8348700	7968100	8356100
1121300	1022200	1050800	1024600	1012800	1147800	988760	957190	1240800	1137900	935680	1163000	1004600	795020	1007300	554820	539280	492660	700790	983380	991750	886820	860800	1004500	582370	1038800	708280	1095800	1299300	888660	1089000	971700	1181600	868630	1094300	1004000	1176600	842090	1163900	819630	1049900	444600	820430	899900	1272900	1036600	894490	1216000	799690	1001100
164820000	174550000	187130000	181050000	169510000	174580000	178770000	173700000	176870000	188310000	185690000	191600000	191450000	186670000	185540000	183280000	186160000	192050000	186350000	173280000	189220000	170750000	173190000	185340000	196970000	185330000	195020000	191980000	188060000	195840000	191070000	184460000	191700000	193590000	193590000	197830000	189390000	194010000	199050000	195990000	189730000	179340000	217600000	204060000	209000000	192680000	187320000	184820000	180770000	178070000
205820	225220	251930	251110	283530	244320	274060	296980	165690	251970	274150	315790	256030	188330	269490	189130	238120	237660	293620	298800	286010	133780	246160	327390	192170	309520	316660	214790	257430	237650	253400	217670	248470	297450	193740	279570	189020	280700	171340	93943	271250	308010	237620	353670	244080	241090	252220	255960	221430	245550
611330	681220	702830	654520	635960	603540	789970	618980	692650	672970	673730	721700	756690	430390	820100	796380	747140	816350	772860	802770	765640	708870	744540	794980	726270	845690	845940	761840	704730	753260	847640	718630	749540	676620	801520	662120	793740	690890	828480	809280	763080	765600	727890	644770	685410	675190	699980	694810	782620	730420
29026	15099	66978	0	29883	83160	20499	28405	29900	72607	0	0	0	0	0	17251	23502	19305	2869.2	30478	0	54182	15986	0	55519	22471	59481	17836	34755	55726	0	24151	0	0	0	30243	0	13821	24652	0	0	0	0	0	0	0	0	25191	0	26119
630230	496180	421290	728180	447070	457190	713220	461810	551720	712350	608070	549670	717150	741150	782510	716730	260400	815600	663090	783140	701520	648950	592600	682690	452580	512640	585290	804350	545290	472910	723510	642850	433210	490580	376840	677950	579640	742330	713560	551790	457760	704800	770560	689980	504410	835180	756690	477960	671570	721510
925670	939250	1062100	986890	972270	909710	1022400	1199900	1014600	1016000	874120	972210	934490	1142400	1093100	1202600	1134500	1104700	1012200	1080900	1119500	1147800	1100600	1183700	1103900	962220	963750	1015700	961130	935010	1035900	960900	1115800	931960	1101500	1245900	930200	733540	898990	936320	980090	900500	976830	1022900	1016600	1073800	1130700	1085000	1108500	1022600
553500	543640	693090	559110	487040	614580	362150	450400	569180	105870	613160	564140	542530	611030	858680	878750	802400	1105500	544110	538350	544070	580660	446580	802810	779600	665370	490480	193550	526640	497050	779690	597250	486410	673320	1057600	732800	504640	553300	511410	518330	400760	516040	1444300	1015500	1573200	1055200	666750	1251900	746650	609410
314640	240350	307730	340280	239650	161010	331480	340140	69505	282840	172110	389490	405460	371540	370500	387830	361860	328130	248780	41729	34470	377880	344550	337800	412410	375140	368500	374650	327850	314510	360320	283750	357470	346720	274840	238820	315280	395290	378150	351210	126580	219710	278200	369660	362080	296960	294380	365990	345920	371520
92384000	97996000	104260000	106030000	97654000	105370000	105500000	101320000	97106000	97744000	96372000	100670000	104880000	102190000	101660000	103230000	95306000	96146000	106070000	101380000	97864000	95146000	94234000	92059000	99816000	102110000	103370000	108360000	107790000	108720000	106340000	106760000	109720000	109410000	113890000	113790000	107450000	107600000	109570000	103180000	108100000	96240000	124100000	114300000	120880000	122360000	110630000	113920000	110180000	104170000
70801	20144	27879	124290	45875	119500	31714	65036	22007	77107	69736	0	41685	45802	110820	0	82338	120120	58529	157490	179880	14088	105420	154160	40175	57634	0	90527	104920	32623	41913	0	61490	112210	119770	62017	45766	100290	43258	24196	18607	0	34487	0	80303	47445	64899	82171	44600	62075
1359100	1311800	1767400	1429500	1495200	1484300	1251900	1087500	1275500	1790300	1708600	1784600	1318700	1326700	1101600	1729100	1570500	1583500	1357900	1250700	1352200	1465600	1560300	1336200	1317700	1597600	1423300	1751700	1718500	1835000	1208400	1371000	1263800	1779400	1950800	1919600	908690	793160	986180	1955000	1719500	1749400	1395400	1289800	1415200	1435600	1737800	1546200	1155100	1321100
0	91844	18764	64277	22314	65655	62648	55425	70524	38994	51450	51812	105160	56882	65601	146190	110880	45263	29166	74672	101240	30256	88046	7728.7	58149	111090	88408	11414	23230	78271	82496	5540.6	111540	59445	46084	31757	64624	63856	29294	52120	89163	11568	23141	50049	49158	88562	44824	67800	109290	44078
0	0	76246	75535	96999	99030	0	56948	0	81945	50479	61787	0	50139	0	0	60493	0	0	69673	0	81232	67023	93972	0	91160	26166	0	0	36292	0	0	0	92638	72698	55019	0	66067	0	0	55840	61593	0	0	0	0	0	0	37465	0
821920	773100	969510	1037000	664770	680000	804350	783440	723830	928840	907680	780460	978800	1044600	1000400	1176900	1022400	972330	597950	820880	972990	931780	866450	755220	896990	945970	928690	983110	1109400	971250	872500	894980	953670	960800	912830	951810	941970	886840	1356400	759960	976530	1009700	1038200	916200	1031100	614600	844850	1016200	779420	807400
282730	95123	109040	42518	101680	101710	308720	360700	86981	353480	726830	376300	118500	138840	336550	42020	354870	255320	80825	61315	143610	302310	96640	104790	21879	154020	265180	165150	38344	151380	112260	41288	64257	60354	88831	113550	262860	233590	52349	37200	164220	55951	110280	324990	50497	158350	191460	191060	346380	107020
705570	809570	866910	864230	854540	853210	767520	851720	859970	867050	679420	898660	900150	841830	862600	937520	758840	844620	703030	838800	939780	741380	859120	903290	792970	813700	867910	809670	744720	832660	884340	783960	939650	793690	906520	869030	791140	803950	919270	793940	856050	791480	952400	892370	958010	781770	867480	831360	779850	796020
12021000	13161000	14020000	12037000	10677000	12067000	14491000	14359000	14362000	13918000	13764000	14263000	14467000	14059000	13683000	13502000	13667000	14000000	12889000	11577000	12334000	11984000	11967000	12576000	14660000	14787000	14346000	13340000	12932000	13819000	13415000	13690000	14214000	12309000	13490000	13237000	13706000	12757000	14537000	14337000	14769000	13611000	15307000	14968000	15894000	14117000	13919000	13896000	13821000	13162000
51417	101360	61667	44810	87868	26130	80250	93213	69886	86619	65383	50430	104230	33533	117130	59365	13838	77599	81252	0	61494	24978	183850	78767	100410	109530	58215	87033	80174	107220	81753	102190	78251	47585	106350	69088	10652	72459	105080	69879	27919	52478	74322	110610	145630	43376	67513	96009	74524	59663
96130	88176	117060	117470	107940	144670	151990	72787	131480	204610	136390	132630	32447	145200	148350	153790	135990	83176	140290	338380	207640	220800	77292	114120	104070	145170	109110	128940	139140	120420	102840	39097	128190	111290	149380	39608	157900	160210	143890	132870	142760	170770	135300	0	142680	209780	165960	38567	75551	94204
0	16557	45021	0	0	112170	25081	0	50408	0	60155	81833	15672	44599	18806	23609	0	0	54854	24949	83431	0	51559	39759	130350	66677	47241	6062.8	0	44422	23957	24596	0	0	33729	0	19467	29200	77332	37441	0	28268	48770	19246	67470	37660	67320	56788	0	104790
15046000	17141000	16382000	15444000	15476000	16098000	15262000	15994000	15938000	14826000	15001000	15545000	17902000	17109000	16089000	14582000	15463000	15348000	18284000	18059000	16212000	16232000	14414000	16873000	16423000	16330000	16215000	16276000	16606000	17157000	18033000	16796000	16871000	16793000	18230000	18918000	16508000	17102000	17941000	17834000	16788000	16351000	17835000	16843000	17071000	16973000	16568000	17130000	15672000	16553000
3601800	4279200	3759500	3924000	3818100	3721000	3599400	4022200	3799500	3856000	3815800	3636100	4049900	3766400	3639400	3819400	3671400	3972100	3003000	2801700	2662100	3945100	3442900	3209100	3702900	3193100	3819800	4391400	3869600	4128700	3995300	3543000	3719300	3749600	3391300	3742200	4184900	3674900	3458400	4089000	3769100	3799700	3894300	4203800	3717000	4269700	3902700	3845900	3699400	3346300
1249100	1273300	1280100	1524000	1358900	1275400	1199800	1429500	1244500	1472400	1169500	802250	1299800	1194800	1212000	1204000	1376900	1024400	1622400	1341400	1598700	1324200	1317300	1324500	1266400	1414300	1456300	1339400	1267900	1121500	1064000	1132200	1062200	1115000	1189300	1156800	1137900	1115100	969520	1362400	978270	1322900	1405800	1084900	944200	1200300	1185200	1219700	1289200	1142300
295530	352590	107350	148500	246010	220790	128760	144490	184510	202200	259810	291980	355200	75985	212300	143230	196710	241000	139570	263150	341180	251460	220710	107600	251880	280160	322930	242170	149480	430900	234420	198880	140530	220040	189150	255810	69429	197070	0	235030	173010	90735	99698	174090	200250	361120	216340	276410	159490	217860
8407000	9108800	9139100	9522400	9266200	8653000	9089800	8970300	9115800	9270200	9117400	9047900	10033000	9682900	9949800	10526000	9930100	10610000	9897900	9942700	10233000	8964500	9333200	10159000	10160000	9758100	10311000	9732900	9518600	9888600	9367800	9390000	9766800	9258500	9595400	9697500	9640500	9528100	9839100	9364800	9521500	9409200	10184000	9896400	10131000	9699000	9916800	10258000	9335100	9326600
655530	752310	768760	572680	735050	550150	732710	681620	784230	694620	914560	799080	741090	623860	717160	590370	860560	703310	679080	803130	1013800	814340	901130	635020	733980	715950	751010	664220	688600	685330	535040	511340	606380	565250	623430	694090	590740	718440	810640	746730	726440	696240	728060	656380	655440	800170	640390	603010	679790	624460
0	0	0	0	0	0	0	0	0	0	0	2790200	0	0	0	0	0	0	0	0	0	0	0	0	0	0	0	0	0	0	0	0	0	0	0	0	0	0	0	0	0	0	0	0	0	0	0	0	0	0
0	44893	0	0	0	0	0	0	0	0	0	0	0	0	0	0	0	0	0	0	0	0	0	0	0	0	0	0	0	0	0	0	0	0	0	0	0	0	0	0	0	0	0	0	0	0	0	0	0	0
1716700	1961600	1714700	1626200	1845100	1845800	1851100	1686500	1886700	1955400	1948000	2187600	1337000	1843400	1901500	2324700	2098700	2387800	2069500	1828100	2052700	2064600	1981500	2020500	2110100	1950600	2024600	1937500	1628400	2031600	1758600	1698000	1671400	1611700	1688500	1800700	2044400	2024400	2037800	1990200	1967600	2102600	1885600	1549400	1829700	1727400	1573800	1731600	1719100	1751700
192300	207800	112600	136120	179650	178540	105860	181430	214470	202390	218660	152690	241770	192640	192700	243820	236420	213120	183970	260960	201220	153460	234660	230080	241700	148980	245120	82991	191470	194920	200910	199910	204530	161980	67143	166670	228010	271610	229770	209880	217090	182040	155190	183550	174220	199360	203560	193990	216230	198730
1225500	1179500	1213500	1296500	1071800	1306100	1249200	1215400	1262000	1307700	1313600	1350400	1367400	1246200	1230400	1387500	1302200	1321000	1357000	1270000	1357300	1230600	1216900	1280100	1270700	1238300	1383300	1167400	1309400	1288800	1262600	1193600	1311200	1164800	1158800	983800	1118200	1352600	1315200	1330800	1246200	1268300	1218300	1121600	1219900	1178800	1023900	1167100	1066500	1253100
0	0	0	0	0	0	0	0	0	0	0	0	0	0	0	0	0	0	0	0	0	0	0	0	0	0	0	0	0	0	0	0	0	0	0	0	0	0	0	0	0	0	0	0	0	0	0	0	0	0
230270	202650	127440	294430	288210	230590	257420	202010	277230	243570	190760	278730	245730	230280	283000	296360	275710	68941	214170	290910	241250	238070	283520	455550	253820	163660	254680	208930	218200	124260	263570	203910	228940	113580	106400	238050	205810	213390	234800	146470	250360	229520	202360	233940	151680	235790	248670	273120	131040	209570
540450	462630	503790	455010	555750	507850	446090	478430	491860	381820	365290	464970	423060	328840	320870	248910	466760	496310	503600	515400	476400	393550	434590	516580	492780	409190	394480	503050	470270	513940	511500	527120	480960	499420	592290	545410	510690	472270	389520	423900	491410	465520	385300	418720	400860	469940	538380	435750	595440	497330
45204	37598	34136	21856	22149	31091	107930	0	30156	28000	35869	36706	54265	26338	37782	4107.8	0	31477	0	17984	21581	0	16161	13867	8576.1	0	20495	53084	30004	18176	54455	30494	28084	59275	46032	30488	17931	24751	38397	65676	36395	19308	26764	41729	22527	0	0	32313	60973	60646
1372600	1536700	1548900	1519400	1466200	1445100	1588000	1518800	1508500	1638600	1453200	1424500	1519600	1537700	1519500	1152700	1318100	1184000	1677200	1527700	1331300	1337800	1423500	1547100	1570000	1428200	1483900	1457500	1455400	1521900	1785000	1706800	1585800	1564400	1731300	1442400	1711100	1651700	1479600	1585100	1529200	1420500	1675900	1454900	1560700	1663200	1683800	1736600	1744900	1702400
188170	295800	200520	188290	112850	269410	296610	333290	269250	318830	256150	437310	331160	287830	293670	286400	335420	354180	279560	291330	235090	292000	297470	278420	273370	321520	302570	275240	207150	239730	287810	210650	308110	266860	311550	257140	244850	305970	270590	315460	309100	206040	294290	327270	202250	289920	261240	309150	258550	277290
2617300	2755600	3013200	2934300	2889000	2947900	2637300	2815600	2885500	3111600	3024600	3132500	3048300	2936200	3080200	3062500	3052000	3246500	3444600	3171700	2920800	2986000	2789400	3022800	3210300	2979700	3192800	3116900	3117300	3228400	3236500	2823400	3098000	3159800	3253500	3263700	3137100	2974400	3021700	3246200	3322300	3084800	3106700	2970700	3212700	3221300	2884200	3219600	3240100	3071700
923780	869500	856600	886000	879060	884360	1049200	998970	1088100	959130	996540	952200	943340	959290	937840	984150	897150	910210	1052400	1121400	1059300	965620	879460	1151100	947270	1041400	1156700	882170	891760	923500	836200	852160	913260	778620	921510	899680	956680	964000	898360	1084100	973360	898320	998450	1029900	1028500	1000200	919620	981030	919200	826270
14906000	18292000	22916000	15021000	16658000	25985000	21755000	19626000	19082000	16930000	16483000	16093000	22849000	27069000	15863000	24847000	33282000	30940000	14394000	5417600	12026000	29062000	15961000	20675000	19210000	14921000	22003000	16335000	20312000	3935000	14476000	14363000	13955000	13263000	8422600	7153100	19997000	19249000	9172300	16385000	15905000	3695400	16841000	10730000	12245000	14633000	11659000	9022900	5421700	16753000
296690	0	0	55978	0	0	0	0	0	0	0	83292	0	236210	0	0	52359	0	119310	0	0	0	0	0	0	0	0	0	0	96180	0	30966	0	0	0	0	0	0	0	0	107390	0	0	0	0	0	97061	0	0	74144
897700	794480	1094300	913030	1212200	1193100	1063300	1067300	1043800	1142300	1006600	1050500	1144200	1108300	1106000	1151200	729520	1086100	1335100	908980	1105500	1106100	741770	1400100	1205600	1073100	1152800	1071700	977020	947440	1108500	1059000	1153100	1008100	857020	903870	690130	865430	1098400	1019000	1160200	1111800	1328100	989720	1217300	1138300	1155500	1248900	1060800	1056700
512370	201440	381680	354950	225850	458640	129650	317810	461060	262810	599450	474350	335490	314700	496990	267020	326380	319960	485290	771080	994110	437900	749480	340320	657160	621840	790810	609660	591860	39474	620400	95028	396030	561220	717570	713300	404810	628040	532240	663550	559280	395620	828410	562660	483880	549090	590300	613920	484710	334070
280850	325470	340670	244890	287040	269890	323960	339690	280570	349130	348580	380680	325890	329150	162450	321480	316470	346850	345330	334600	373410	311520	269330	304160	312250	366070	344980	288080	319560	403690	288420	310310	317860	201890	241390	281100	300250	336890	348950	301790	371140	269460	264830	288600	282400	258660	264590	243360	287930	263720
34272	20952	40460	21225	35731	21463	0	36509	21697	0	95007	0	15121	55342	69933	17795	20764	30328	17500	19044	40272	190370	18743	5290.8	40061	23841	14174	23474	24252	38048	45264	19012	16758	75673	19145	58652	0	9144.1	7052.9	33617	0	64982	0	0	13392	0	0	0	22672	23712
159930	267920	278980	170140	180710	130410	165200	378370	369000	362810	264600	244360	160540	135990	116940	256810	411000	424840	303120	281380	395040	358870	352540	457490	187270	88763	319540	258530	333780	208440	134990	38077	80913	275230	168110	283210	205690	83422	107400	341310	145630	453720	71047	138040	131280	299450	238920	208270	204780	39394
51209	66474	0	19388	66395	34668	0	36707	59005	94866	63278	69142	55186	25709	78172	97891	0	98757	62746	35934	0	63338	76918	66055	40275	0	89905	0	71135	58860	0	0	84975	90716	76125	0	40026	71584	0	68658	0	42724	86742	68034	37951	63041	48248	78321	78728	68425
0	0	0	0	0	0	0	0	0	0	0	931970	0	0	0	0	0	0	0	0	0	0	0	0	0	0	0	0	0	0	0	0	0	0	0	0	0	0	0	0	0	0	0	0	0	0	0	0	0	0
2002200	2260000	2474900	2568900	2088900	2054100	2047100	2298900	1982300	2276800	1885600	2445600	2262700	1679000	2448500	2679000	2535100	1259000	2773800	2595900	2624600	1904300	2161000	2454500	2456300	2602200	2635200	2164900	2161900	2105800	2484200	2450600	2524300	2159300	2228300	2189400	2542500	2494500	2526800	2169400	2712600	2340200	2312200	2198300	2393300	2457400	2082300	2752800	2354800	2375900
885870	1325000	730220	1310800	1060900	1128600	1145600	1111700	1198900	1186000	1228400	1104200	543140	1118500	1062400	1127300	1332900	1215300	2013600	2419500	2062700	1653800	1519300	1861500	879750	1157400	513530	897730	876910	1117300	892060	1021400	862300	720630	813150	850160	1150300	1070500	1249300	1151800	1002600	1295000	780120	401180	809750	947310	603250	870660	786350	733670
414560	0	0	0	0	404600	373640	0	0	0	1035300	0	0	547820	0	0	0	0	273050	647420	648040	702690	1143100	728210	0	0	374340	0	0	0	0	0	0	469360	2198600	0	0	0	0	0	1072800	0	0	678400	766950	0	2328500	0	0	0
0	0	0	0	0	0	0	0	0	0	0	0	0	0	0	0	0	0	0	0	0	0	0	0	0	0	0	0	0	0	0	0	0	0	0	0	0	0	0	0	0	0	0	0	0	0	0	0	0	0
110770	262020	228710	138890	222830	157300	227640	190050	191760	241980	96186	136340	185830	79206	60226	262530	142800	193610	112730	144030	177530	182150	151960	117640	139190	84605	118850	125450	94822	143210	37363	186490	89072	115310	223300	225660	119660	67532	218840	178660	134940	241010	168520	150050	142460	144310	203080	111000	155240	197790
420410	484450	461750	551720	490110	520140	431190	506200	462680	407760	435660	401500	536360	1105000	531120	449500	465790	395850	356340	272500	350750	365410	488430	411680	351210	382980	457560	629770	128210	420350	466870	571460	482550	498870	472830	360850	457950	541760	492700	675730	569200	509230	372090	427750	490010	378140	70351	439600	491120	457110
0	17479	0	0	31956	0	0	0	0	0	0	23990	24429	0	0	0	17459	11015	0	0	0	18930	15462	113110	24633	0	0	0	12737	0	0	0	17403	0	26007	0	0	0	0	15400	0	39157	0	0	0	0	26539	22700	0	0
669120	558200	449740	490350	528210	564290	584360	587490	742260	617990	565390	603570	579100	582310	558980	498980	461160	440690	570760	513150	553840	507310	539420	501650	635510	632100	645370	557950	499010	513820	592140	538970	621420	624460	582840	668420	663510	667050	678450	624420	599530	675850	263490	579420	683120	673840	642780	566910	555200	570690
413300	469930	453000	462290	397830	492560	353000	481500	457940	479360	480340	508830	445080	557210	451080	560260	489870	570460	611420	553860	617240	528760	510060	587360	492740	399420	479020	413770	470100	495570	398480	456780	422970	466300	434280	438540	424110	411240	460750	487960	474360	275570	511670	399480	461190	428570	373330	441910	379600	422760
140920	27409	54779	55473	141220	168400	62103	41659	202910	60616	127170	82100	93745	5766.9	88538	30354	65975	51549	34182	80020	91792	83073	58549	17562	42389	87226	68173	73024	207780	0	36569	4934.5	117690	80051	15830	83262	19952	37178	93099	121000	155900	168690	147220	87927	25591	50749	29491	193540	107870	40271
80874	43805	30226	16007	0	49753	42234	0	0	25110	47430	25133	0	0	66548	60718	43678	62068	51523	47547	82451	20973	75508	28839	0	0	20453	20636	0	22703	41717	14945	61518	24408	0	0	42851	0	0	0	10384	0	21342	0	23754	12060	18207	80048	21249	0
346950	79289	144130	361860	374420	473210	451700	311790	390480	354330	417100	329160	417340	381160	316440	306890	456720	475920	343340	466820	261900	239940	278530	435460	385040	193060	155860	174540	373780	386670	418070	320640	100970	347430	382310	310490	336660	116910	246360	94065	303180	329690	333630	320870	160700	366440	322770	323330	385010	328190
364920	259070	443880	390640	241350	269950	316370	263010	361460	368180	366130	335080	321270	314490	331760	399300	349250	380430	381890	402330	460220	327190	307610	280680	181860	290630	265380	356460	221390	217140	389340	360110	423450	415780	339120	412130	404380	370860	429970	391730	309760	348980	297650	340290	277690	321700	358150	322240	304880	447730
6631400	6828700	7347200	7280900	7143800	6886100	7003700	6959400	7078100	7278300	6936000	7032900	7517400	7309400	7352600	7548300	7058700	7027800	6649000	6421100	7016500	6724000	6902200	7134000	7239700	7043700	7094500	7418100	7372600	7241400	7246600	6937000	7060900	7492700	7091700	7380300	7473700	6771900	7148600	7592400	7075200	7253700	8005400	7084400	7498600	6868400	7123100	7487600	6794100	6545500
439460	371100	430660	464300	431310	423500	405260	391790	468920	400820	434350	408830	431450	465560	489450	420850	477300	419260	77669	57674	247360	191130	166440	230250	459570	456740	487410	342560	354690	406470	459950	433870	431560	418300	381500	442320	350310	450610	397210	407780	513000	466190	473010	414350	444410	439270	422080	432260	423370	439570
311240	210570	342400	357790	376330	472630	316260	236200	465190	351940	309260	274250	280400	354620	434590	410820	435980	390630	433020	386110	416690	448950	476210	436910	392170	355590	406110	273020	352570	390810	358570	346290	308980	296510	167270	154090	391070	318170	387010	122250	389890	341580	222180	226090	227960	137080	295660	289610	301530	309650
71110	70818	59922	233870	166920	141580	264870	361550	335790	278120	296920	268380	48812	84932	234520	47951	290250	198470	30842	116930	320630	238950	91889	274590	238240	232520	289310	300010	161840	241960	264340	234900	385700	258300	373910	229590	265390	156060	172540	112200	234360	245760	387750	240930	363590	289210	286460	272630	146600	299010
5420600	5363100	5332400	5667300	5351800	4958000	5413800	5342600	4956500	6036900	5353400	4832200	5846800	5878500	5595000	5537400	5786700	5096100	5154900	5158800	5125100	5338600	4929100	4865300	5563800	5858100	5779300	6045400	5955800	6043300	5842300	5695800	5618000	5743200	5675100	5610700	6097400	6152300	6355300	5873500	6048700	5479300	5607200	6303700	6142400	6192400	5610800	5776200	5253100	5251300
3396000	4073400	4226100	3949400	3930800	3916300	4257200	4201200	3901700	4061400	4095600	4190600	4109900	4095300	3927200	4511600	4150900	4732400	3779100	3869300	4028000	3988900	3627200	4392500	3982600	4258300	4463400	3964000	3834000	4219200	3792300	3923600	4040100	3889900	4326000	3961600	4190400	4266000	4265000	3857600	4045100	3845600	4214300	4073200	4468700	4318000	3738200	4018200	3852300	3826900
0	0	66235	0	0	91401	0	0	88369	130180	0	36079	0	65210	174050	145260	182820	55173	132210	76233	146180	0	21780	150530	194790	191090	178370	40051	0	0	111050	164800	0	0	120880	0	0	125560	0	0	109660	36088	54952	137050	177690	112810	167750	45387	0	0
839370	877490	1319600	1618000	1141900	568250	1886100	1324000	582350	1136400	1326800	969170	1013500	889840	1247700	1157000	245330	859580	933170	1028800	976370	823280	1232900	1208100	1133700	1138100	1164100	1202200	929610	407900	1062700	498820	939080	175280	570720	622060	768540	1342900	426690	290460	910110	1101500	778620	1248100	530120	793050	1711300	385520	1073300	813380
955090	1414100	1243300	1697600	1364100	1187600	1576600	1431000	1622700	1404900	1330000	1508700	1527300	1392600	1455000	1551600	1818800	1456300	1170000	1380500	1239300	1214000	1314900	1499500	1651100	1617800	1633400	1394400	1467700	1583200	1152700	1622000	1363600	1308800	1369700	1301800	1731100	1465200	1511500	1521900	1144700	1364600	1255000	1481300	1127400	1592600	1702600	1437500	1522300	1648300
485290	622190	637730	604330	440380	579120	559270	620310	634140	459890	672860	617370	578280	575050	679650	552950	595100	656210	753630	643980	686090	642630	632770	664930	603750	585230	589320	561650	583880	627010	552680	586390	505120	491250	557900	547740	593690	662940	668710	639360	595690	673610	614990	617560	585400	558880	540210	608970	597940	546670
1033100	1010300	948070	980880	1138300	875630	979140	920830	1057700	1119700	1061600	1093500	1155800	1137600	1055400	1170200	1058400	1170600	1205100	1229200	1062600	920690	1106000	1139000	1164100	1170200	1203000	1115300	1100800	1080000	1108300	926330	1119300	1015200	1006900	1019500	1177800	1208700	1093200	1157600	1276500	1188600	1142000	1183400	1246100	1089400	1076200	1149600	1030400	1032700
851660	983010	979250	913530	926590	1089100	1040600	1115900	796260	1155600	885180	1001200	1101200	1018000	1094300	1072900	1097400	1231700	1111300	1151700	1134200	995690	1036500	1021000	1116900	1115500	970480	1083900	993760	1082900	971950	961970	860080	987480	938550	843020	1068700	1032900	1150800	1078300	1071300	1065100	910650	928420	958640	940340	970600	884570	940070	932800
1784300	2044400	1975100	1911700	1784900	1815000	1986300	1914500	1980200	1893000	1808000	2090200	1989800	1880900	1965400	1380900	1678300	1967200	1764300	1401900	2109000	1852300	1702500	1786900	1702000	1723800	1937100	1777000	1772900	1764400	2044600	1992800	1835400	1668500	1823600	1765000	1875500	1836800	2006400	2020400	1997200	1854500	2122600	803070	1944700	1822800	1874600	1892100	1777300	1935100
475770	556280	520610	719610	618070	597020	1053300	586190	615730	441430	704210	894310	574800	695390	738250	709790	758560	422470	626740	547460	631000	842180	801740	640050	332730	220260	742000	666410	574690	416480	845830	572440	708990	596830	635050	385320	572830	1081000	804670	565080	857550	742590	620650	852950	318610	1232000	1255400	969930	676250	499860
907590	1041900	1002800	1091400	1026800	959980	1103000	1052800	1036100	1090800	872220	819810	1058100	921910	958350	996980	974990	945850	780250	904060	598240	882410	844250	672910	978770	734070	1046100	1113100	1111600	1059600	1077600	990950	1034800	1091100	958040	974650	1026700	996010	1004300	1093700	1111400	1069100	959660	860620	907600	1082200	1011200	1028500	1034900	1001200
795960	805830	756980	884170	896990	849220	826510	820500	785210	875500	895340	787060	894230	760220	794470	890620	670820	929450	867650	866230	608230	731960	813050	632130	818020	827520	988140	815860	845040	921970	813530	819870	708630	878340	830250	773530	804170	940850	845010	846800	982700	910010	858850	934640	894740	1026300	864800	854860	870610	903470
981530	757810	912230	835490	925610	832960	1209300	477870	923950	579300	886940	805490	1155700	1018100	828730	1020900	1214000	1229000	1193600	1041800	687150	981790	1050200	984000	1055500	851120	1107900	1039900	965340	879900	947680	962990	804190	994770	735860	831120	1089200	1122900	1012600	972890	941370	1091100	612070	842910	855760	779270	710350	758480	919710	1083500
369340	498960	450740	469480	461130	476960	493820	441320	448730	440310	391350	396960	391960	422290	423740	571300	415580	453340	536970	518220	609150	488730	446020	474030	456350	500420	454360	420590	360250	320210	393750	379480	380660	418800	367930	276430	417270	395340	371630	408390	246330	347700	356380	292500	371670	393670	363160	384850	372750	379350
0	0	47039	11770	79756	0	113560	37730	0	79413	60173	114610	73576	0	0	38416	96384	45871	0	37498	0	0	16606	38396	0	0	18534	24312	36889	0	0	0	0	0	22199	14935	23766	0	0	0	39604	65882	0	0	28108	41484	0	0	79814	0
1037800	1431700	1364500	1253000	1383500	1368700	1445500	1341200	1359100	1328200	1446300	1419800	1366500	1349600	1446800	1617200	1589800	1685200	1929800	2029200	2281500	1823700	1853900	1845300	1202200	1451900	1379200	1127900	1196200	1313400	1388000	1353500	1544300	1126200	1401500	1418100	1079000	562570	1464500	1319500	1389500	1313400	1404000	1402300	1740500	1328400	1332000	1379100	1302400	1351900
815160	883210	895180	984170	798320	960900	854750	788240	848200	931120	920430	911470	818870	857720	771240	931960	855850	967600	853560	809950	886410	836660	833770	873400	959510	977350	884400	831930	865600	759690	922130	831990	873010	863960	752300	786100	828800	964890	821910	893490	916120	983970	979450	740810	721470	883990	809010	977460	893620	797360
120530	106170	154500	188520	153990	50899	144530	160310	69580	109700	150510	190550	210840	68820	148080	168680	548210	123900	152200	167740	160010	127560	56122	194740	238960	157450	103720	60845	84236	77410	233490	153980	103060	251020	173350	99928	95885	205670	130490	72667	196660	70188	125030	164600	177280	189720	241460	371040	202440	112840
258910	257350	250540	234550	280400	360310	140300	276050	297160	122360	324510	340220	164380	270130	257570	392190	297630	284320	505300	360880	156110	254520	298650	325710	267510	338750	383770	310430	348160	187280	247750	348850	174450	194380	365840	289520	347350	332490	321990	347780	674620	185400	306170	391860	377770	281800	302840	313540	309880	279830
871570	1149400	1235000	1081500	1145000	1285300	1258400	1038800	1412500	1223300	1074100	1109500	1474900	1073500	1341600	1042400	1113600	1174000	1435600	903560	1266200	1240800	1199600	741050	1233100	1012100	1150600	995240	978470	1204200	1256600	1332000	1284400	1228600	1181000	1192600	1339300	1242100	1215000	1156800	1280600	1267100	1624700	1497000	1534400	1289900	1090300	1017600	1056100	1366000
559640	643870	641880	652660	629660	701870	404980	487340	518060	550660	501300	506050	392940	412080	335010	682750	633060	583500	546900	510740	558850	491000	553320	477970	631120	508200	479650	661160	702750	662450	470470	511710	416800	624240	577490	603040	438150	532490	500840	528690	622460	583650	627610	469040	538250	561110	549730	613020	563590	465040
313700	340490	378950	390640	441650	396280	354280	351920	379770	387210	363750	323990	386270	372080	391180	487850	385760	462000	378720	335740	336000	343740	343110	367440	398340	362960	413260	407380	388670	356850	354360	331190	415670	383220	337540	353600	345150	386220	344410	374550	383820	376850	378730	390510	386580	340370	365790	413550	363470	363510
327140	382520	353290	234200	251900	255540	322360	437730	427780	440570	296030	418960	478470	421040	473500	409490	359430	312230	410160	386570	388870	288200	373030	314970	472600	425570	483840	401350	395470	402520	447780	419300	456440	378890	347640	375390	495310	0	453830	294000	194130	394110	313320	490070	510770	280710	352320	275150	430080	391640
0	0	0	0	0	0	0	0	0	0	0	0	0	0	0	0	0	0	0	0	0	0	0	0	0	0	0	0	0	0	0	0	0	0	0	0	0	0	0	0	0	0	0	0	0	0	0	0	0	0
151240	68720	151130	177020	145220	206200	114130	175540	179390	107530	161430	119140	53998	107330	145550	164410	211610	196920	128030	149170	75746	190970	143050	190070	99326	69574	178020	177500	182000	145800	97925	76165	136860	91297	121390	106980	123340	141750	32963	184550	45511	148980	63065	38743	34086	64885	97125	140450	150810	157230
332930	421810	429670	463460	418500	416480	422560	374990	378650	434330	403960	411470	356400	303600	398130	381700	393270	420880	319000	412850	446790	425590	416290	495800	408510	401260	410470	360360	381880	327080	385800	388680	350760	377270	308360	330270	319090	325080	349870	432170	324350	386960	396950	423550	397990	401520	380830	412460	338610	366130
886030	1053100	974900	994110	1011200	888320	833670	1031900	885110	999350	981970	856330	1119300	1042300	1116800	923690	1183600	1145400	996820	1171400	1275500	1107600	797250	1007100	1098800	1022600	1178900	1057500	1038100	1128700	950050	960960	1108400	959240	1029300	1030900	864310	1083700	787310	1085800	1059000	979540	1070700	1059400	1112200	1045300	1014300	612000	874990	983660
158030	75428	227900	244810	236160	242300	130950	131290	173670	166200	52460	102900	210370	213520	260990	204980	145910	164040	267430	317870	221750	343920	274580	183050	308650	227210	223650	180830	257260	220480	244100	225000	87425	278280	167250	278240	213040	212590	91818	79110	151690	176310	249600	251370	135940	294510	231560	70861	163650	134990
0	0	0	0	0	0	0	0	0	0	0	0	0	0	0	0	0	0	0	0	0	0	0	0	0	0	0	0	0	0	0	0	0	0	0	0	0	0	0	0	0	0	0	0	0	0	0	0	0	0
146270	377970	480430	101450	309360	249380	391920	220300	542120	374560	508460	92751	611100	247550	312640	52278	546330	607550	588470	475200	336110	109550	183320	450160	380340	554820	729230	564600	86290	487350	488910	227840	486580	455980	413170	415430	449570	742730	457100	366760	777070	344230	436690	385600	442940	139090	549430	461240	267980	500960
7927000	8652500	8270000	8126300	7429700	6831200	7923700	8543500	9199100	7454200	8231200	8239800	9575600	9953900	10327000	8168700	7661600	8864600	8981600	12580000	10986000	8859800	9801300	9364300	8970900	9013900	9435900	8539700	7812200	8755000	8712800	8632600	8889100	7790700	7507700	8360100	8874500	9761300	9145000	8372100	8214200	8921200	9722000	8829900	9924900	9841000	7959500	7566600	8432000	8203200
22069	242520	0	4110.5	0	4140.4	0	0	0	0	0	0	152820	0	54158	39280	25848	13843	0	0	0	14824	0	7325.7	29423	10178	182940	29986	26801	29682	0	0	0	0	0	3793.7	10014	0	0	1407.8	0	0	3918.5	3196.4	0	0	0	0	0	0
417990	580940	508060	489800	502130	509130	585210	574950	543530	555730	513440	549300	468340	578150	554040	535420	427510	647010	389030	409040	625130	505060	564820	483890	600250	504430	622760	490000	423360	453200	573240	565870	541040	546430	454410	496860	577180	511980	527540	562630	385730	524770	703110	575280	641700	456750	485460	456930	545160	533970
350620	444600	419400	282800	373230	547780	567940	374720	433520	347170	439520	457250	410340	450750	401250	327050	567420	435630	567870	1109100	658500	582370	555790	564920	345300	414700	461970	390290	313590	353060	418040	434600	500250	364010	350760	326750	358210	428650	379870	485120	438550	491430	393080	444800	313870	321610	444710	245260	297460	489340
531890	584500	595050	613410	622590	615270	529660	558190	534980	527790	547760	561570	613570	581070	538060	700070	641300	660030	631810	649510	663450	558570	569240	560360	620000	565800	636890	594470	555720	579150	578810	565220	595650	479540	503730	570780	629560	658440	640960	600620	600390	594180	564290	554160	602600	534850	564850	608710	546040	553110
0	0	0	0	0	0	0	0	0	0	0	0	0	0	0	0	0	0	0	0	0	0	0	0	0	0	0	0	0	0	0	0	0	0	0	0	0	0	0	0	0	0	0	0	0	0	0	0	0	0
173710	171410	112940	29655	167760	61853	144380	161040	76862	128960	143050	70270	41555	24408	113890	159020	214300	166810	95511	38852	56320	78996	192240	42242	57785	31416	94550	67131	23919	160410	186830	77441	50003	111420	68397	64986	96141	32479	157210	63624	40392	28628	152110	128560	120620	96157	129690	23364	94641	176810
1075400	1287100	1187600	1177600	1110000	1200300	1274800	1179100	1390200	1353000	1296300	1446300	1205400	1177300	1280100	1235600	1396500	1297000	1438400	1321200	1440500	1504800	1375400	1519800	1197100	1252300	1482800	1147400	1239500	1490500	1284200	1215100	1199100	1251400	885940	1135100	1390600	1293300	1306600	1362600	1026100	1278600	1392600	1144700	1180800	1321200	1324900	1299900	1308000	1253300
640620	631960	936190	628940	714480	756060	563580	613340	569650	615930	740940	571060	776820	761640	697470	727920	255950	763300	1012000	474440	734610	599010	681230	839690	753230	683360	559030	504920	720950	502980	619090	727210	568750	493930	567290	444760	714230	544420	901910	786820	792430	707600	410460	600360	609730	507320	528620	556780	552730	569680
0	0	0	0	0	0	0	0	0	0	0	0	0	0	0	0	0	0	0	0	0	0	0	0	0	0	0	0	0	0	0	0	0	0	0	0	0	0	0	0	0	0	0	0	0	0	0	0	0	0
3529200	3744400	3505200	3849100	3781700	2647100	3506600	3465700	3363700	4065200	4046500	3753500	3355300	3414500	3187600	4092400	3921700	4142200	4261800	4205200	4417800	4203800	3914900	3934900	3717600	3421200	3362200	3805600	4170800	4523000	3480300	3207800	3378500	3658700	3381900	3689200	3273800	3912700	4035500	3726300	3886800	3411700	3065900	3277600	3587800	3608500	3255600	3330600	3387800	3369300
364380	370520	417770	466550	407410	366970	472880	440180	499210	453860	415010	544180	493140	450130	464810	529070	526220	552930	404820	413460	451560	431750	442770	507970	566500	536490	566330	368890	450670	442920	453310	428490	451600	376720	436140	363420	334630	473340	410960	461990	470620	503180	506560	465270	372460	409910	412380	448450	421870	367790
4996600	5816600	5793200	5509700	5767300	5218900	5332400	5130500	5056800	5311600	5248200	5216700	5639400	5603600	5587900	5629400	5234500	5484700	4657300	4664700	5248500	5030800	4643900	5061200	5095500	4579600	4988300	6255400	5542100	5663300	5673200	5197500	4864400	5662900	4896200	5322400	5761500	5086400	5241600	5833100	5342700	5344000	4837400	4270000	3987800	5297100	5318400	4411400	5530800	5182400
2062200	2264100	2264100	2552300	2417200	2461500	2731000	2306700	2471000	2461000	2233800	2675900	2680600	2634800	2570600	3731300	3381200	3209100	1881200	1745800	1868000	2083600	2376000	2461000	2565700	2517400	2302200	2178900	2132300	2545500	2325600	2101600	2263800	1831000	1926100	1656600	2213700	2366500	2588600	2184100	2212400	2173900	2254700	2622700	2477800	2135000	1871500	2067200	1969100	1946100
702690	551030	929430	388930	1729900	2285600	1043900	625340	875540	891560	1192900	609860	327220	317850	366340	1233700	2420300	1309400	454660	942960	743670	975590	915340	1056700	724890	765320	685370	1572300	424060	1050600	100520	455550	1289200	1034000	1163300	695850	608520	707070	720040	1503900	1560200	346960	756480	548910	858200	1201800	815180	771780	802470	696340
18303	0	0	0	0	0	1507.9	0	0	0	0	0	0	4945.7	0	15490	14592	0	0	0	0	0	0	0	0	0	10017	0	0	0	17015	11040	0	0	0	0	0	0	0	0	8134.8	0	0	0	0	0	0	0	8887.3	0
2312800	2431700	2545900	2568100	2808400	2439700	2524700	2883400	2654100	1871800	2187900	2416900	2643000	2940400	2596400	2548800	2403500	2475200	2610000	2619900	2618600	2611700	2775200	2190900	2613100	2963700	2829300	2548800	2534000	2715400	2611400	2772400	3000600	2170000	2561200	2701300	2636500	2691100	2516400	2793100	2703100	2418100	2770900	2253600	2806700	2635400	2713500	2695100	2514700	2553200
215100	230600	225950	247320	260780	221510	127280	243690	239160	228410	221650	254260	293650	260840	233650	266650	290860	252100	258940	253690	259520	287640	225700	286370	296090	259980	267020	275570	256730	251100	272560	211650	286580	168900	248060	230780	263500	262100	265330	245650	254970	284020	296810	209420	256280	211030	302970	255630	245930	259510
1641800	1758400	1727900	2031900	1583100	1927000	1940800	1756800	1793800	1715900	1897800	1906300	1905300	1969300	2098200	2262500	2043900	2140200	2031800	2031300	2347800	1764300	1775300	2097000	1452400	1933200	1963000	1950600	1824500	1921100	2122200	1838800	1903300	1686000	1823100	2333100	1859000	2010700	2459800	2117900	1784500	1789600	2184600	1954700	1931300	1848800	1907600	2380500	1716500	1650500
0	0	0	0	0	0	0	0	0	0	0	0	0	0	0	0	0	0	0	0	0	0	0	0	0	0	0	0	0	0	0	0	0	0	0	0	0	0	0	0	0	0	0	0	0	0	0	0	0	0
64168	80054	59206	70782	68758	22571	104070	92770	85009	87536	93317	79070	105820	109720	121860	112070	113040	125470	90112	83384	52091	87166	92706	86381	103850	109350	114750	85570	69834	61712	101660	104730	82142	58357	75599	27899	25493	89223	82527	89808	84099	69359	112470	112900	83693	94838	85350	91853	83709	75593
374450	1327000	1314800	1186300	1233600	1364000	1470900	1270500	1439600	1473000	1446800	1474100	1449400	1307500	1455500	1489700	1359700	1527100	1398100	1358200	1099700	1470500	1369300	1269300	1460100	1377100	1533400	1321600	1225600	1410800	1539200	1224200	1385600	1287800	1340000	1191600	1474100	1289600	1162200	1450300	1303100	1069600	1357400	1135900	1296300	1452700	1272900	1411000	1322300	1344900
136700	172840	152990	93516	187110	186760	177910	206210	174040	75790	178750	154990	187230	178630	176230	0	113270	192630	80733	96040	138520	0	141760	176080	201860	34205	131390	262660	179870	162710	133610	161470	169560	169200	188430	162430	174560	345520	113420	132900	185400	149020	214090	85408	196800	290510	305260	220820	240220	217080
215240	332650	278960	307380	346740	250930	370040	265120	123620	236680	333070	335320	277650	325360	261300	168620	222410	175280	297510	234250	298010	267250	325600	250200	221830	193220	238720	173250	296720	130280	177640	264520	323570	142460	252730	147960	69150	53235	371200	213020	198860	139560	168010	254300	233280	239490	309910	305480	273900	114740
4868000	5312000	5758800	5418700	5322000	5017900	6008000	5609800	6022700	5678500	5532700	5695900	5520100	5653500	5887500	5920700	6232000	5993300	5910600	5431500	6281900	5985900	6055700	6956300	5944700	5699400	5606800	4828900	4953900	5376900	5233800	5245800	5341900	3777600	5245600	5008100	5491500	4719700	5686800	5997400	6238500	5372800	5930900	5618600	5736100	5084500	5339600	5583600	4924800	5197700
894600	1039000	919610	1001800	852520	1041300	1002100	1145900	907750	994010	899940	1167100	1074100	1060200	991150	1143300	1123100	980810	927540	924560	1046900	891680	1045600	945440	942960	1129300	1087500	1094500	989240	1181900	1132900	1070400	939100	979990	1042400	907120	1121200	983930	1082600	999720	918840	1076300	1090200	1023500	1091300	1113200	1046100	1065900	924060	948010
156150	264200	216240	300950	251480	275010	273730	240880	207880	240650	231130	266920	256480	239990	267030	238560	297030	278290	216350	225730	267060	237210	203560	244810	257240	232850	277970	262360	253690	244250	182080	267590	265680	209220	267390	180160	264070	232310	222730	234480	257940	282470	265270	270280	283290	308940	236970	254900	272980	159350
870670	946170	1016600	960620	988020	931930	889610	953930	852540	898240	868330	916920	980660	944300	1012300	1011900	1033200	1082200	1072900	966030	1205700	1020000	1059000	1086100	1041800	1002100	1040800	981990	940000	946990	946180	928110	921130	766830	781600	860450	930950	949020	946690	977590	998070	942950	819450	788560	719960	830370	791540	821010	896750	868380
1522000	1609800	1680800	1578200	1372700	1632400	1514500	1528000	1491100	1555600	1581200	1613700	1583000	1516700	1563700	1629700	1510500	1603500	1755500	1663400	1937700	1619400	1757200	1740100	1529900	1545800	1573200	1519300	1495000	1617400	1602200	1548300	1512100	1476800	1390900	1542300	1564500	1579600	1689800	1605700	1494600	1620100	1586700	1455400	1514000	1471100	1473300	1558300	1402400	1404700
1796700	2144600	2054500	1996800	1801000	2476700	1914900	1290400	2141600	2558100	2298000	2336800	2271700	1582000	2021100	2257800	2359900	2591500	2028400	2015000	1747600	2081300	2059600	1912300	1818000	2193600	2173100	2206000	2255900	2446400	1726000	1836800	1768900	1674200	1876800	1973600	2447200	1098500	2046400	2363200	2169000	1770800	2373800	1986200	2127800	1828600	1963300	1789300	2100300	2143100
412240	470650	487070	457090	409780	453440	604680	400090	525300	457420	446650	497640	479260	477620	519840	747520	728890	638510	437300	465160	465260	564690	419860	483150	588380	521980	573720	516070	356590	375880	481050	377100	502760	428090	341120	304010	520870	414530	422460	403060	340060	345480	395330	466870	525610	411000	397960	422320	416030	385680
74558	37175	81646	283200	54266	0	83991	0	238310	0	117460	0	0	0	166250	0	0	0	0	0	24867	104410	0	60225	95265	0	0	0	0	0	67574	0	59440	0	0	29111	75363	0	0	82437	0	0	116140	0	0	0	94666	101910	51272	103720
2923800	3475400	3375000	3409300	3376500	3214800	3526800	3273600	3416100	3272600	3502900	3340500	3681500	3265800	3384600	3596700	3597700	3782200	3613700	3594200	3539800	3466200	3670600	3237400	3668000	3220100	3562600	3530100	3834300	3607300	3563500	3358700	3540600	3487000	3445300	3433000	3871400	3686600	3690100	3800900	3495300	3310200	3490600	3336300	3284900	3336500	3580300	3612100	3609500	3761700
81394	0	76749	187690	40698	49146	340430	58892	26414	48543	0	50580	0	0	0	34674	52291	0	43005	22080	0	0	78394	0	25169	0	73260	68114	49316	0	45448	0	0	0	0	0	32783	40993	0	82316	102360	0	31760	21120	43914	0	34920	64874	44625	32430
1987800	2306200	2245900	2402200	2190500	1967900	2284100	2142200	2302500	2360300	2392000	2279800	2615200	2399000	2345400	2840000	2675900	2625700	2306000	2443300	2606700	2261100	2523800	2515700	2654400	2478400	2506000	2430000	2273800	2396800	2355800	2243200	2285900	2318400	1976200	2313000	2317800	2281100	2558800	2399600	2430600	2324300	2538100	2448200	2369800	2510800	2330200	2624900	2294300	2279700
147200	0	107870	142190	0	153170	122380	0	163890	164460	0	0	175050	121460	172720	171700	147880	171030	113920	169180	180560	152720	155490	150770	132040	169970	211460	145750	0	57358	141590	160120	146800	149260	117820	175800	149510	170790	224920	146420	142150	162180	128180	81697	144400	179050	105090	146400	0	131100
48812	40985	43146	123540	37745	0	13937	28658	17443	77233	110640	0	0	42012	18785	50477	16801	43217	109820	31468	53132	75353	41402	29356	46192	0	51877	26428	0	70371	0	23262	24662	0	0	34269	90823	100630	0	33449	60594	0	30983	26296	0	0	0	0	0	32236
34412	11961	135140	0	66374	109130	0	19742	0	0	87373	0	0	95761	76222	0	0	0	133500	129860	0	54331	0	0	90802	0	0	0	0	0	0	0	121690	85431	82018	0	0	110270	8732.9	0	0	0	71287	0	0	0	0	0	0	0
420400	372910	32136	309980	167610	259270	0	266800	229160	475230	249820	408040	462290	143900	0	264480	97963	183260	415220	34013	215950	377480	0	370650	302080	34439	140700	0	374430	310680	254230	80037	53255	52867	145170	39893	391690	151800	0	324870	295750	0	0	0	294140	0	227890	336700	229850	238400
102430	37626	144740	111140	218070	147420	64065	143200	51896	170990	79862	0	178200	195330	44777	117490	226070	81507	66333	110410	56930	163850	32170	29454	42249	0	136390	284690	287160	92214	224880	77141	98338	281640	80489	171250	91764	202720	106630	282080	112200	134610	230300	91511	90930	221370	283640	206340	149960	71839
414450	461330	553230	420840	420250	428970	394800	368310	352140	383010	394770	452420	416670	391430	393140	384130	320340	310870	314150	292680	365190	364560	380650	318150	400550	438910	333330	411410	433860	348460	385210	289790	357640	385040	394120	394280	392600	347700	376680	457820	444210	418590	370620	308680	325970	411390	342150	398110	361940	361790
1330700	1458700	1550500	1422100	1478300	1556000	1566700	1533300	1496300	1688000	1549200	1733800	1725900	1660900	1541400	1649500	1557600	1484400	1519500	1521600	1742200	1454100	1409500	1447900	1574900	1605500	1712400	1666000	1506300	1622700	1577600	1610500	1605900	1510000	1427900	1476800	1754700	1552000	1711600	1601800	1516100	1573300	1669400	1502700	1593300	1490800	1320800	1415400	1509600	1525800
4927400	5520800	5630500	5550900	5858400	5564500	5471100	5642800	5431600	5299000	5696500	5851700	5770300	5646600	5653400	5745400	5616700	5715300	5712900	6132200	6099600	5400000	5863200	5887400	5487000	5398400	5934600	5871800	5813400	5782600	5436400	5611400	5453100	5282400	5419300	5527300	5760600	5734700	6102800	5992200	5922300	5872800	5529800	5522900	5484800	5652700	5729700	5718100	5742400	5460600
524920	652090	726540	666140	696490	627370	655290	591770	684580	639020	653430	602820	727130	629880	707120	512260	569890	423070	687600	624280	721690	636960	697150	593220	646850	608980	685790	604480	721890	618450	696680	565010	654320	608720	478500	575800	689210	634810	644600	436450	605680	617670	607150	646330	555590	592880	607120	529320	614290	569950
92718	50486	30751	0	37141	20358	0	20070	73095	115150	47632	111200	60340	70979	0	44731	9512.1	65968	39911	0	50042	13337	32061	75905	38313	12086	75809	34561	22990	0	8327.1	44398	54993	45654	10311	11687	0	0	59976	38178	47035	0	33274	0	31187	0	0	38723	48190	106330
2578400	2918100	3308800	3087500	2926100	3034800	3114400	2958600	2889100	3111700	2914500	3346900	3447100	2707200	2914900	3388800	3016200	3041500	2785700	2856800	3214100	2718000	3089700	2972200	3196800	2920600	3254800	3148900	3302200	3232900	3237800	3112400	3262800	3297000	2983000	3528700	2931200	3254200	3486500	3318100	3603000	3250700	3422900	3757200	3750500	3481400	3373400	3950100	3084100	2989400
1603900	1715900	1733600	1798400	1916300	1644700	1694400	1820500	1800800	1880000	1618100	1886100	1957400	1717600	1853700	1836000	1659800	1869300	1617000	1550400	1704000	1586200	1543400	1695400	1806200	1780000	1773500	1698500	1552600	1442200	1639500	1766900	1619300	1457300	1393200	1550700	1892400	1729200	1844900	1631400	1918700	1638000	1641300	1553600	1426400	1735100	1599900	1614300	1655500	1662200
0	23260	21659	16020	30500	39292	0	17245	0	11431	22340	27912	0	0	0	0	21368	0	10430	18741	24822	35701	0	8188	0	14625	0	0	0	0	0	0	0	0	0	9016	0	0	0	0	28961	0	0	0	0	0	0	0	0	0
2477200	2755900	3010300	2772200	2353100	2584600	2693100	2530500	2679200	2569900	2428600	2609600	2744200	2534500	2649900	2678500	2688600	2771400	2315500	2803900	2612800	2909600	2472300	3011700	2562600	2612300	2906200	2659300	2551100	2578200	2819900	3121800	2761600	2448500	2635000	2648500	2797400	2815400	2888900	2844900	2799600	2471600	2870800	2729000	2933300	2959700	2467800	2566100	2655900	2628900
0	0	0	0	0	0	0	0	0	0	0	0	0	0	0	0	0	0	0	0	0	0	0	0	0	0	0	0	0	0	0	0	0	0	0	0	0	0	0	0	0	0	0	0	0	0	0	0	0	0
0	0	0	0	0	0	0	0	0	0	0	0	0	0	0	0	0	0	0	0	0	0	0	0	0	0	0	0	0	0	0	0	0	0	0	0	0	0	0	0	0	0	0	0	0	0	0	0	0	0
1405100	1511200	1492100	1465700	1124100	1242400	1410800	1267000	794720	1496000	1220900	991160	1123600	1135000	189120	1452200	949340	1365100	1356500	1354400	1294000	1098800	1370200	933240	1422700	861710	1206600	220230	1137400	1291900	1028700	1152200	1351800	1048400	1512800	371310	983290	1568400	1401500	913240	127480	1046600	1580600	809740	1103800	1664400	1505200	870440	931130	1364900
262010	424050	397150	301280	396180	379610	280480	378710	304430	329370	315760	362680	377580	284320	190560	415020	377110	395270	297860	292530	368540	349400	349800	182670	348350	351140	403180	291860	290070	278620	420770	392720	383870	384830	394380	324850	418270	358150	340140	361370	449500	395250	371330	336160	251230	452180	427060	447930	397310	331450
0	0	0	0	0	0	0	0	0	0	0	0	0	0	0	0	0	0	0	0	0	0	0	0	0	0	0	0	0	0	0	0	0	0	0	0	0	0	0	0	0	0	0	0	0	0	0	0	0	0
172220	158050	233750	256680	85676	56531	221210	376620	277720	214860	242830	223630	241110	294160	204510	308830	256930	361530	154150	52635	184540	158190	214350	202950	147110	217120	331630	198570	224820	200100	305230	273010	259060	347780	200530	328710	203880	109630	232140	253670	203780	177200	251950	223560	235310	169250	278120	318550	290400	299750
23438	0	0	50225	0	44231	83461	0	59820	0	64309	0	19241	0	14314	32307	29514	48666	24896	0	0	0	57993	21843	41278	50968	46756	12898	0	53974	0	0	31284	0	50636	50795	16673	0	50989	69695	37057	23497	0	26975	26790	51025	0	72353	70851	55863
170070	86823	297800	290310	131740	245950	168500	336010	185640	0	0	0	0	274680	319530	125590	254700	71737	135130	359330	467140	443640	340780	406730	272090	117970	221100	170860	265220	182460	76679	0	363580	0	180000	109040	181040	0	173340	261960	0	212000	109160	124570	183910	186540	219270	0	287370	262640
198410	169780	220240	240980	228970	231540	216530	235220	205040	197340	200460	220920	231330	255980	226410	264710	224550	235220	201680	182820	191530	219550	200730	233900	127080	210530	133130	236610	230070	227520	279530	182900	207550	167170	181300	103300	232370	211250	236330	222260	224170	201600	174230	140710	201190	204610	169080	194220	217770	191920
0	0	0	0	0	0	0	0	0	0	0	0	0	0	0	0	0	0	0	0	0	0	0	0	0	0	0	0	0	0	0	0	0	0	0	0	0	0	0	0	0	0	0	0	0	0	0	0	0	0
4174000	5385300	5479500	5483400	4528800	5328400	5762800	4793100	5371600	5778700	5281800	6181000	4489400	4235400	4418200	5352900	4914300	5648700	4827500	4414200	4455700	5063400	4677000	4583000	5906200	5543200	5391500	5242500	4776100	4445100	6279600	5862400	5788200	5725000	5095500	5002300	5847900	5654600	5879300	5841100	5668500	5412700	6613600	6395500	7314100	5784400	5763000	5773400	5513500	5621600
1898300	2094000	2224300	1991100	2195800	2168100	2177100	2097500	1932200	2134000	2095500	2352100	2288100	2129200	2329600	2221600	2291700	2464400	2124000	2076200	2342100	2355900	2318800	2115900	2314100	2124600	2437400	2078400	2184800	2123800	2482700	2184000	2442100	1963600	2024800	2018200	2013700	1930200	2232700	2086500	2120400	2147000	2489100	2091000	2542700	2042100	2088300	2195100	2042200	2062300
974820	1045900	1179500	1061200	992710	1147800	1183300	1172800	1117000	1124800	1042900	960250	1304100	1055100	1203500	1083000	1061600	1146300	1168600	1183500	1082300	1089800	1194200	1144800	1188900	1075800	1200500	1044900	1056700	1064800	1034100	1094400	1103100	1124700	934780	1004900	1041700	1120900	1037700	1048900	927560	1036900	1103400	916010	1086600	981510	946260	1334300	1060800	1088700
83717	50015	126610	186070	133170	124760	250940	161690	231890	199630	197770	163800	217200	148950	333330	40808	176090	208340	138330	159190	102490	167580	208970	86046	133450	60318	153180	77959	165340	103930	41291	135700	164510	85138	64087	82233	109540	104310	102980	108440	154050	114280	79201	72224	57979	216430	204230	107670	213800	159840
6245100	6735900	6584000	7165000	6868400	6747000	6234200	5623100	5861200	6244300	6299800	6605400	7163000	6912300	6926100	6808300	6935200	6997200	7359400	6730900	6846800	6290300	6318300	6391400	7394900	6918000	6881100	7129400	6784000	7056100	7249100	6930800	7155900	7384100	7435700	7380300	6770300	7177600	7263000	7247000	6993700	6393900	7656000	7341200	7551700	7243200	6838300	7227800	6649600	6481900
0	0	0	0	0	0	0	0	0	0	0	0	0	0	0	0	0	0	0	0	0	0	0	0	0	0	0	0	0	0	0	0	0	0	0	0	0	0	0	0	0	0	0	0	0	0	0	0	0	0
202530	289890	274590	240900	262930	251790	265610	344950	242740	266040	312750	217290	332220	360010	342730	324200	339000	359720	310720	419240	350970	294470	256020	119940	377670	313750	241650	228100	339870	250490	466760	297900	355600	375660	479730	552150	275980	283130	279810	298260	146580	308240	319080	400740	476680	529790	533620	549200	408810	271610
289930	314960	266130	210050	406080	315690	375390	452400	327970	342780	359500	339650	400260	380190	386900	334950	275860	374770	306080	399520	299290	374560	431060	273910	400600	334540	388730	239450	343080	317410	381670	299730	460590	318090	283390	336720	331330	205480	397750	311330	311550	318600	430270	349760	418670	407110	271460	356950	408990	315430
4211100	4577800	4325200	4658300	4665100	4627900	4457600	3986700	4437400	4881500	4681400	5140100	4191400	4011600	4093200	4934000	4348200	4971300	4896600	4082200	4679900	4733400	4665600	5079100	4671700	4190500	4744100	4933100	4691400	4048800	4284700	4447600	4440800	4133100	4442100	3811800	4687700	4626600	5153800	5144100	5151900	4405400	3757200	4021100	4075400	4574900	4440600	4680300	4980600	4628800
3662300	4010900	4183000	3968400	4092900	3989100	4110100	4335200	4447000	4135800	4125700	4217200	4335400	4440500	4318700	4392600	4280500	4428800	4344700	4212400	4612600	4235100	4328400	4675800	4467600	4477000	4791000	3949600	4021000	3953300	4533400	4198400	4441700	4029400	4114500	4204600	4139700	4145900	4011900	4189000	4233000	4031400	4358400	4399500	4627700	3863100	3975100	4161800	4115800	3868500
348040	323900	421240	406490	267580	328850	365660	280630	357050	305270	414940	366610	219680	323490	347070	507620	262350	458370	255560	255490	456930	397140	254410	380460	354280	285100	284190	327450	271820	427650	327290	348960	311470	268060	315930	376830	408250	371350	256510	395290	331320	317540	163250	251230	422720	269120	394750	400730	300550	313090
0	0	0	0	0	0	0	0	0	0	0	0	0	0	0	0	0	0	0	0	0	0	0	0	0	0	0	0	0	0	0	0	0	0	0	0	0	0	0	0	0	0	0	0	0	0	0	0	0	50671
1947800	2159200	2259400	2340400	2106500	2369300	2357100	2227800	2339500	2213300	2325100	2498800	2406800	2211300	2372200	2536300	2455700	2302000	2450700	2304500	2432600	2391700	2401100	2417600	2363100	2438700	2348600	2215500	2238300	2416700	2313600	2219800	2239200	2222100	2115400	2234500	2535800	2245000	2405900	2361700	2313100	2265900	2407200	2316600	2423100	2332600	2264000	2291000	2234800	2099400
178170	198750	236800	237120	200100	186580	274650	257170	214860	220500	179550	224280	290600	288470	253400	227510	237760	233450	251920	226540	246070	259670	223000	162190	299080	244510	269030	211500	202480	192470	237670	242310	269360	185150	80925	213610	208750	260990	208160	159780	245640	246130	258210	228090	274740	255220	238270	281450	224140	237860
1455300	1606300	1522200	1471700	1296700	1120900	1747200	1691900	1757600	1636700	1657000	1673400	1959500	1859200	1816400	1831200	1692100	1759400	1474800	1477100	1467800	1374900	1389700	1606200	1745100	1722500	1725500	1353900	1345100	1392100	1496500	1473900	1494300	1412500	1371900	1370500	1396500	1394700	1431100	1479300	1501300	1463600	1458400	1342100	1455400	1280100	1258100	1366500	1597000	1464700
66802	61475	57924	73005	59766	35032	51704	64697	64058	84506	0	76462	86908	82768	90210	106360	0	79812	58572	68476	77549	71359	65326	76029	79070	71562	75987	80655	83534	96446	81721	89867	77185	0	72786	86732	63723	68670	76440	20709	91030	69670	11547	47523	85903	70293	85786	86297	17565	65590
279190	320910	234200	236990	327030	266780	267980	271550	256420	247130	253690	256930	299420	247260	256700	333080	334920	303360	272070	284860	277280	273980	277110	271030	214890	84895	209200	245070	271090	285810	224130	216550	320800	288100	229850	271570	307710	273350	284290	247560	291430	261240	281560	192170	133140	304460	236140	241830	250310	321020
312230	167670	367310	389110	374760	353050	344560	362030	346500	0	402220	397940	337070	401540	368260	421070	431770	424350	420740	387780	420190	400670	389040	390280	185560	258840	235970	336890	351700	238870	359380	352300	392250	95702	350780	369660	365690	365750	416030	411700	371630	344110	350510	376760	380200	375700	328760	383630	370160	389220
0	0	0	0	0	0	0	0	0	0	0	0	0	0	0	0	0	0	0	0	0	0	0	0	0	0	0	0	0	0	0	0	0	0	0	0	0	0	0	0	0	0	0	0	0	0	0	0	0	0
1666400	1727000	1807400	2233400	2066000	2080000	1624100	1682400	1770400	1978600	1981500	2091200	1888700	1802200	1801000	2389200	2439000	2303800	2094600	1992100	2145700	2049800	2035200	2063400	1889800	1904300	1908400	2141600	2367800	2315500	1915800	1903800	2021300	2253800	2231200	2452100	1985400	2030400	2122600	2184000	2087600	2309500	1991200	2050200	2039800	2307700	2402600	2468900	2103200	2103300
3630700	3658200	3770700	3085900	4740800	5125500	3334200	3819300	4094000	3377500	3630300	3741500	3752000	3427000	3638400	5119200	1522600	4342600	4110300	4012900	3336400	4014200	4109800	4281400	3398100	3311300	2898200	2900200	3270500	4301500	2579600	2457400	2682100	3102300	2160700	100880	3764100	3821000	3589900	3866900	3400900	3823100	2862100	3021200	4589000	0	2481400	5208700	2423900	2559200
1824300	2095400	2127100	2038000	1959200	1936300	2084800	2036900	2263800	2072400	2096600	2009600	2264300	2119400	2150000	2004500	1911300	1973500	1967800	1885900	1999800	2076300	2083700	2126100	2156200	2071500	2325500	1940100	1846300	1779000	2167600	2102400	2278900	2036000	1972600	2109200	2132400	1893800	2162800	2002400	2085200	1959700	2231000	2054200	2200800	2056600	1945200	2011800	1982200	1929900
2415900	3288400	2843400	2393300	2597900	3023700	2379500	2921600	3583100	2854600	3558900	3340000	3477600	3208100	3742300	3624400	2853900	3609100	3019900	3527100	3617600	3689200	3131700	2913200	2838200	3070800	2977600	3473300	2631600	3930600	3795700	2880400	4398300	4511700	4264100	4236600	3546000	2600600	2361700	2870400	3070200	3847900	4362500	3582500	3371900	3723200	4323000	4276400	4244000	4221500
3356500	3779700	3732000	3761500	3583700	3867600	3798500	3641800	3747900	3700700	3870500	3468400	4150800	4105800	3986600	4311100	4349300	4285100	4355700	3994600	4150100	3948600	3828900	3681000	3968200	3834100	4101300	3766400	3913600	3973900	3951500	3966900	4229700	3661600	3829300	4120000	3924500	3998200	3984100	4057600	3794300	3874100	3913400	3716900	3968800	3860200	3780700	3899100	3695800	3924000
21319000	24918000	22602000	21677000	23313000	22467000	24586000	22844000	23123000	22811000	24342000	23400000	26064000	21819000	24583000	24087000	22561000	22594000	23131000	23152000	21951000	22875000	21455000	19073000	24510000	22352000	24083000	25094000	25163000	24082000	28756000	23520000	25963000	26782000	25239000	27629000	23869000	23533000	26038000	23539000	23634000	23387000	29447000	27704000	31649000	27953000	24885000	28608000	26215000	25236000
74700	130790	136580	107050	78489	33682	180110	122690	116930	29044	24001	59041	94543	105730	72963	131560	164870	114950	61424	107200	75397	51237	82618	20326	86500	19530	9921.1	64698	31314	126470	67715	198280	167140	38499	130180	111300	70777	66808	0	86122	115660	136050	84412	0	11810	73949	79764	0	139410	146820
356320	350560	422090	473880	422580	402550	440030	393970	319460	309780	290110	396840	334290	179040	169060	361940	264630	201520	352910	290050	363290	296110	352010	345070	353060	332380	336910	370600	453670	368710	372340	368390	208960	176970	426410	373900	370060	359900	345720	369210	325650	351920	164260	377500	425610	440070	152830	145310	397280	357230
144500	128590	0	187700	174680	170070	181070	195670	159720	194350	154030	158920	183790	170400	184860	215540	188230	0	169530	170600	170000	154240	144920	175550	176590	187080	182350	184550	171170	185500	170870	186950	147190	210960	244810	237610	157350	193200	0	160860	206490	193710	273830	267630	276420	272280	271290	251790	209600	201680
17063000	19947000	18589000	18838000	17576000	18611000	18617000	18430000	18096000	18293000	17436000	19006000	20463000	18574000	19554000	17242000	17533000	18887000	18662000	16743000	19112000	17246000	18234000	17762000	19953000	17385000	19693000	18534000	18514000	18064000	20363000	19759000	20708000	18274000	17548000	19646000	18833000	19509000	18211000	19062000	17848000	17595000	18804000	20734000	18507000	18010000	18088000	19435000	19357000	17668000
0	0	0	0	0	0	0	0	36111	0	0	0	38281	50200	0	0	39506	0	0	0	0	41966	0	0	22384	0	44685	0	0	0	0	0	0	0	0	0	0	0	0	0	0	35157	0	0	0	0	0	0	0	0
0	0	0	0	0	0	0	0	0	0	0	0	0	0	0	0	0	0	0	0	0	0	0	0	0	0	0	0	0	0	0	0	0	0	0	0	0	0	0	0	0	0	0	0	0	0	0	0	0	0
2974300	0	103040	3006600	0	2962500	0	0	0	0	0	0	3088900	4249700	3162600	3107400	0	3219400	3206300	4163400	0	0	195870	0	3060400	2915200	3170100	0	0	4127400	5086300	0	0	5868900	4185000	0	3054200	0	3047600	0	3006700	3287100	4342900	5561800	0	5745800	5586000	4407800	3438800	3470400
490510	177130	457740	234010	455780	298940	309970	343490	671610	310370	575510	656540	588930	306840	413850	558580	325780	721500	281100	62270	327600	372580	211820	840510	394590	331810	379550	208390	434510	374560	748420	405000	530640	172310	275800	326270	281380	53966	631900	320400	241430	199270	535530	620180	469960	306390	448280	105370	365830	375000
195730	537940	511480	574740	530040	375920	599100	519630	602090	415400	496690	497060	585600	516060	530780	677540	516960	574270	514970	455590	303390	470400	440430	573160	518730	477260	473740	512530	504870	519570	548960	474890	525670	429090	570360	553480	498520	601530	504220	532330	512520	495640	501680	541790	399850	538210	468500	513280	382810	516690
1989700	2189300	2595000	2281800	2354900	2284200	2282000	2329300	2379700	2167000	2185100	2384400	2603800	2457200	2562900	2701900	2503700	2762700	2618300	2620900	2266500	2152900	2190300	2593000	2581000	2600000	2671600	2298800	2244300	2461600	2484000	2331600	2471000	2351600	2524700	2732800	2601400	2580800	2617900	2493200	2461900	2606200	2882500	2546800	2907300	2693100	2732100	2373100	2307700	2190400
3186400	3622100	3498800	3639800	3530800	3618400	3704800	3648800	3864500	3730900	3399900	3665000	4061300	3758600	3952400	3943100	3712600	3699600	3988200	3854200	4111000	3644000	3642500	3967600	3722200	3790100	3813100	3678600	3844400	3836100	3782200	3552200	3654100	3529700	3653500	3846600	3964100	3613400	3665000	3942000	3806000	3649900	3748400	3723200	3764400	3910400	3788400	3882300	3825300	3524600
188670	186640	201960	93737	186570	210450	187640	202800	235340	224050	178740	195570	213760	210090	204620	249170	187810	228640	291130	206400	243500	199790	162420	194850	213680	230980	219960	203180	211240	207100	119490	179630	187120	179600	201360	120610	233300	207910	218750	201120	203050	201260	192560	124050	217440	212490	180790	231710	130010	179570
2391600	3037800	2807200	2603300	2705500	2695300	3049400	3119600	3177700	2921300	2972500	2988700	3468700	3185900	3303000	2755600	2893700	3129800	3323600	3318700	3367900	2945500	2842400	3058600	3254000	3291800	3093500	2984100	2856900	2870800	3138100	3024700	3275500	2707800	2835800	3009900	3384200	3322200	3468600	2984000	3099600	3116800	2871900	3149200	3277100	2859700	2860100	3147800	3146300	3099600
1221600	1270100	1366100	1218400	1250900	1175500	1281100	1184800	1311900	1286100	1240800	1122300	1339700	1298800	1285900	1347300	1357800	1384400	1418900	1468200	1549500	1226400	1368700	1224200	1497100	1395500	1355000	1439100	1322100	1369400	1513500	1399200	1269500	1252700	1354700	1358900	1289700	1428200	1382900	1272400	1247900	1238600	1265300	1432700	1507500	1485000	1331400	1265200	1325400	1280500
849380	974780	875380	887000	817610	864980	803540	846530	822130	947870	918260	805370	835630	845860	957220	979470	898010	859620	1091300	1037500	1144300	954640	932130	908910	823150	852880	797170	966620	891370	906290	941830	826170	854370	893540	861910	928820	904080	829830	856730	868300	820670	897510	657680	800140	870140	912980	879640	977580	955450	873810
0	0	0	0	0	0	0	0	0	0	0	0	0	0	0	0	0	0	0	0	0	0	0	0	0	0	0	0	0	0	0	0	0	0	0	0	0	0	0	0	0	0	0	0	0	0	0	0	0	0
622610	615080	683540	730710	731760	697120	649290	643110	611260	725660	676220	702180	606070	637790	588770	785630	604460	742950	725740	597240	635580	654860	619130	665490	689090	639530	608240	733640	686410	756680	614990	616010	605660	625070	638850	661080	683590	673070	714600	786450	661190	686110	664060	658220	688450	665270	631390	692280	581450	578420
133830	109960	154940	207210	150770	167940	155110	129540	150700	73086	136390	168750	152200	162540	203150	108400	146740	121330	235390	194050	171460	178120	157860	192350	166560	143440	136740	112190	76257	129220	190860	227460	204780	72291	189880	172430	152970	0	160880	169580	199010	118220	184180	138080	151250	68156	171040	138570	65178	143760
953440	835420	952410	911060	957840	916370	1190800	1403400	1134700	1156400	972690	1169000	1090600	1145200	1156000	1385700	1342700	1347000	943180	887870	728440	870170	927770	1024500	1098800	1027000	1086300	978070	976570	857230	1069600	953670	995810	826550	1105400	885910	1133000	1079400	1140900	1199900	1128600	1110600	970580	1012000	954640	941100	1014200	1092700	1040000	994190
1496900	1476300	1721900	1606000	1563600	1699000	1578500	1505200	1508900	1572200	1623300	1633800	1575200	1735700	1500400	1416000	1720700	1030800	1497000	1417800	1686800	1507300	1541600	1605100	1673800	1494000	1827700	1607400	1654800	1528500	1504800	1619700	1629400	1301300	1253800	1691200	1671700	1549000	1607500	1677500	1452800	1562000	1648500	1366700	1787900	1649400	1460600	1467900	1509100	1627600
333440	398650	305780	270780	327120	56741	394660	278490	396890	315280	426720	459570	419170	408460	447200	350330	67111	403810	200420	447550	274950	413490	419590	314320	318100	456780	66424	413200	332640	360280	289950	294080	372890	249320	280000	288560	70725	384040	340990	309920	432910	85289	320190	278220	252240	57461	322940	296380	321760	342900
147840	160940	214830	160260	199660	183310	233790	155140	174460	248730	204030	165360	234670	197520	169850	151370	170790	169220	161330	127120	183490	156880	142440	137950	203890	185950	229000	185060	221380	228820	111230	218090	150500	177300	237630	205360	256960	171320	215960	196950	137560	193990	129130	212570	154080	133150	229270	174650	191930	195320
266290	386470	386370	283980	332400	264820	332260	270560	326680	141470	294910	256250	331590	309900	336000	343550	169970	273980	352660	280840	373090	411400	307760	339390	317960	388960	338170	283600	135280	358550	438060	338620	353020	324700	385000	166660	293700	95000	368810	322960	365900	316400	400250	272460	365220	321430	272100	291460	296600	251310
1259900	1558900	1516600	1512900	1375900	1478200	1573000	1613300	1648600	1579300	1606500	1548700	1607000	1914500	1632300	1649400	1635500	1731600	1379400	1690200	1562400	1451700	1478900	1725500	1692400	1634800	1320200	1529300	1626100	1463600	1607500	1422900	1623100	1473100	1287400	1432600	1485300	1615400	1489600	1697700	1496500	1648400	1810000	1763100	1748100	1580100	1509600	1684500	1585500	1514200
416480	489960	343420	458830	469100	500320	493670	578880	496560	608530	463590	467810	518080	567110	490090	94931	370600	403870	527400	518160	356330	467300	418850	495120	583950	534620	667340	444580	488350	441100	440570	444180	538470	500760	479450	548510	312000	612760	540650	512660	608310	766680	406610	510970	570780	474790	466670	611280	355630	488460
4382100	4581100	4845700	4827300	4755100	4874900	4712000	4752200	4856800	4971300	4660700	4867600	5362100	4849000	4677700	5058600	4849400	5224900	5154700	5092200	5046000	5302700	5381600	5515700	5084400	4783200	5339200	4947500	4879300	5091600	4950300	4726500	4893600	4919500	4705200	4814700	4777900	4702300	4878900	4913100	4920300	4618400	5105200	4525100	5266900	5301900	4735200	5161700	5011400	4824500
957600	1597200	1675500	1124600	1520700	1482900	1440900	1582800	1304900	1706800	1312800	1457000	1983900	1721500	1664800	1917000	2113400	1976300	1876900	1557300	1848600	1667800	1174500	1059000	1877400	1583300	1927500	1817100	1757600	1282700	1600800	1764300	1417900	1747500	1608800	1603700	1727800	2019700	1786200	1328000	1565200	141350	1806100	1674900	2033700	1638700	1201400	1673200	1749700	1478200
21126	15720	48034	0	0	0	0	0	0	38585	0	30067	0	0	0	0	34205	0	0	37483	16367	0	17674	20430	0	0	0	0	29276	0	0	0	0	0	0	0	6486.8	0	0	0	0	10908	0	16033	0	0	0	0	0	0
0	0	0	0	0	0	0	0	0	0	0	0	0	0	0	0	0	0	0	0	0	0	0	0	0	0	0	0	0	0	0	0	0	0	0	0	0	0	0	0	0	0	0	0	0	0	0	0	0	0
82007	86139	70048	103330	29516	126640	52066	109960	23213	72797	74388	92049	59247	107500	0	133880	130160	107280	40399	59416	31461	83924	94018	111710	93598	127840	73623	75277	90213	26417	80656	78990	26285	62075	38176	34691	43210	103320	52206	66527	75454	106310	0	19475	91268	68185	35313	85703	94977	73364
261630	261400	299850	268240	286160	322700	111190	301700	272720	324660	329780	350690	319400	279700	295580	358220	383550	344750	338410	285740	273910	303610	343960	340580	283010	316550	326310	258580	116400	262300	283740	299280	277570	286870	245620	255150	235590	314850	263080	255850	312950	305960	352350	346260	352760	314110	310160	268700	270200	275190
0	0	0	0	0	0	0	0	0	0	0	0	0	0	0	0	0	0	0	0	0	0	0	0	0	0	0	0	0	0	0	0	0	0	0	0	0	0	0	0	0	0	0	0	0	0	0	0	0	0
0	0	0	0	0	51629	0	0	0	0	0	0	0	0	0	0	44611	0	0	35268	0	56124	0	0	0	0	0	0	14043	0	0	15737	0	0	0	0	0	0	0	0	0	0	0	0	0	0	0	0	0	0
0	0	0	0	0	0	0	0	0	0	0	0	0	0	0	0	0	0	0	0	0	0	0	0	0	0	0	0	0	0	0	0	0	0	0	0	0	0	0	0	0	0	0	0	0	0	0	0	0	0
129080	175260	65463	159870	268780	211790	241860	411040	422360	166000	292860	170520	409940	414770	390510	378100	343070	239790	253420	267570	103730	251380	154550	189230	364290	383100	288790	205380	165730	235040	307870	299960	162750	161910	276410	199750	224690	352460	324840	245010	266290	395000	276610	340170	160810	142140	301720	169660	162510	360430
1471600	1635000	1491200	1457100	1593900	1509900	1561600	1492600	1524900	1457300	1576700	1273400	1485200	1973400	1767100	1910500	1636800	1853400	1657600	1784000	1408500	1610000	1698500	1702500	1787900	1290700	1958800	1568200	1733500	1481300	1529700	1794300	1641500	1470100	1749600	1543100	1648300	1631700	1632300	1805900	1639300	1712400	1632000	1393700	1811800	1586900	1626500	1605200	1424700	1539900
1051800	1167600	1300100	1422300	1278800	1303700	1201700	1208000	1310900	1371200	1277600	1246300	1082000	1276600	1201700	1181700	1315900	1458100	1467600	1450900	1325200	1145400	1273800	1215000	1423900	1287600	329580	1354300	1090500	1405100	1272600	1255300	1300300	1062300	1129400	1290500	1378700	1240000	1209700	1320800	1115200	1199400	1384600	1217700	1322800	1405700	1255400	1272400	1282500	1234700
4911600	5643400	5416400	5246000	4973800	4477700	4621400	5369700	5753800	6271900	5625200	6464900	6449200	6264800	6193900	6048100	6415300	6512200	5602700	6294100	5567500	5480800	5597200	5240600	6321400	6060300	6200300	5588900	6140300	5504200	5300700	5764800	5502800	4880700	5083000	5592100	6301500	6723700	5986200	5806200	6047200	6184000	5875400	5631300	5974200	5584900	5289900	5342900	5946600	5758300
0	0	0	0	0	0	0	0	0	0	0	0	0	0	0	0	0	0	0	0	0	0	0	0	0	0	0	0	0	0	0	0	0	0	0	0	251740	225140	359800	0	0	0	0	0	0	0	0	0	0	0
50120	0	33777	63927	28730	64120	37787	60043	84834	0	0	96316	5374.4	40913	54296	0	25176	107270	31376	100820	93514	51314	95155	106480	59437	97756	55206	42065	96376	133680	26916	75325	59710	67044	64720	17971	16054	42376	22674	0	10928	43564	65511	67158	76344	67604	61478	108410	109590	39363
397830	392700	373890	328960	346190	353100	240510	353200	363830	294260	288610	407250	160290	263190	241870	424800	436320	341480	430170	720170	393870	382850	563620	638380	217020	241090	380060	362700	331160	340840	355900	346890	275590	244660	385230	262820	371810	287260	297360	294590	335750	463370	267300	226240	225240	283770	286990	247570	322340	344470
314770	383600	409410	452700	381240	389690	390180	408840	380020	405090	367930	362530	487460	460470	447490	525860	483670	543930	398270	405440	414360	358560	428100	472820	446470	470770	431140	374110	399250	379790	363470	379320	382540	341070	345790	346380	424550	360060	414340	377420	464440	483900	379420	384900	445540	404270	406630	384030	399020	388250
732250	667600	1111300	800000	184860	777080	381970	689070	730850	792080	813270	657170	385960	850860	443650	285260	615300	499600	813320	736230	718000	516440	635570	687950	481100	263740	394760	659460	554230	337260	632620	505780	1042200	849880	1326300	282380	867780	640430	903310	514370	493690	821610	758910	1152500	1705000	754380	1117100	597880	769360	671010
1148600	1516500	1360300	1526400	1292300	1397300	1391500	1479100	1481700	1147800	1361800	869990	1414800	1477900	1303900	1460300	1430500	1218300	1207200	1284900	1311100	1289800	1290400	1358400	1662300	1374500	1360100	1583100	1593200	1644800	1239600	1189300	926660	1395800	1282700	1390200	1529800	1228500	1347000	1577200	1756600	1193000	1771400	1451500	1861300	1736900	1252100	1407500	1469400	1726400
0	0	0	0	0	0	0	0	0	0	0	0	0	0	0	0	0	0	0	0	0	0	0	0	0	0	0	0	0	0	0	0	0	0	0	0	0	0	0	0	0	0	0	0	0	0	12796	0	0	0
106340	130090	116760	130910	177590	113650	154190	176610	160650	144470	164390	155290	153640	160170	146540	655650	263490	140190	107360	84173	81727	62430	228110	104740	138910	135290	110790	166450	105050	21755	94643	154480	265830	127250	109060	34542	153190	99670	76380	159060	136210	125720	129250	134720	175430	207340	115880	59417	120680	79878
461110	461630	413780	428980	491140	434880	383200	518200	451780	459110	410670	664150	423300	450090	283610	344710	413260	307390	443110	405800	522830	445050	428980	439500	272210	404500	467100	547340	437840	378240	469690	128300	406800	415290	372220	409320	0	0	0	170160	0	184350	462040	462760	385800	436550	460550	406780	341340	401940
19313	92878	70228	20905	84838	9926.5	74779	47799	27361	57844	118050	26248	47796	72536	50352	61007	94224	48111	133970	50234	89413	97277	53064	122440	60848	35146	61995	65982	63607	106370	62581	37734	46528	60070	31136	51521	0	21716	49630	54037	0	12657	26765	26047	87944	61112	37775	65963	25302	34897
2687700	2791100	2831700	2939500	2936700	2874600	3080300	2986500	3115500	2969500	2940600	3036800	3196600	2795000	3083700	3181800	3109400	3162700	2858700	2908700	3020400	3010100	2914800	2988500	3073000	2829700	3130000	2770400	2869400	3208100	2996800	2900200	2943200	2515400	2671300	2847400	3118600	2978000	3188500	3116800	3134300	3033600	3122800	2883000	2908100	2956800	2858000	2857000	2906500	2840600
59013	0	427910	252840	107620	0	268110	0	325500	156900	0	317230	286050	227690	125020	0	0	174300	0	170670	268650	0	0	0	0	309430	0	235060	108110	0	0	0	0	0	0	157580	0	466940	137830	0	460950	523600	0	0	0	0	172730	123210	0	0
0	0	0	0	0	0	0	0	0	0	0	0	0	0	0	0	0	0	0	0	0	0	0	0	0	0	0	0	0	0	0	0	0	0	0	0	0	0	0	0	0	0	0	0	0	0	0	0	0	0
1410000	2465400	2386800	2656300	2803500	2497100	917640	2013900	1827300	2390700	2308800	1836400	490520	1466000	1959900	2386200	2759400	1806500	1246000	1501900	362860	1689800	1579600	1644800	1699800	962730	973130	2108500	1579900	2374400	1683900	1524700	1992500	1634700	1692600	1793900	2040900	1576000	2303900	430510	2482000	2453800	802460	1475500	2050100	2056400	1161900	1398600	1973500	1874200
101660	174070	124330	170090	168850	159020	211500	241390	208230	183290	182960	194680	231250	186900	224510	287030	261090	297140	56838	142030	141580	229820	95891	163270	191150	212730	202980	157500	85303	140610	149560	158510	174860	142490	101900	167540	151510	149230	176710	129840	197170	149310	132400	206820	206450	177580	164930	162890	186790	189050
164410	120170	201570	191210	178950	266680	116260	37341	186040	193040	141200	189750	231000	179730	136460	219140	206620	189600	212930	169600	145780	201870	264930	205980	218600	132590	220120	130840	135020	98102	160590	56480	140870	112840	72052	195230	155890	153530	187310	157620	170650	166880	138120	119150	168180	174950	178540	190860	212350	212140
204460	203950	318700	325990	333860	250320	346940	300570	259050	208870	241650	321850	351900	304460	391100	212420	185320	449180	225740	390790	263710	395040	260910	362960	333400	254780	411690	286430	325160	337740	214950	246620	494160	263170	309590	242570	158820	320390	323420	318560	198760	316320	354490	255620	291960	182230	249970	330950	293430	249690
303820	358170	177040	356460	371430	326670	296180	278530	301240	318570	340480	362400	368670	298650	307000	230150	311880	304420	237980	279010	313710	316100	345960	228640	327060	207920	292410	104690	305280	203320	230010	324680	309510	326200	409670	384950	349830	345770	287080	266190	425660	356910	400250	351810	320280	374950	333210	351240	232300	344470
12075000	13673000	13744000	14140000	13665000	12768000	13633000	14004000	13757000	14003000	13995000	14685000	15031000	13702000	14101000	14799000	14418000	14947000	14105000	14241000	14723000	13550000	13741000	14530000	13843000	13689000	13800000	14086000	13603000	14090000	14043000	13112000	13863000	14311000	14558000	14617000	14957000	15292000	15432000	15232000	15396000	15019000	15479000	14974000	15823000	15490000	14819000	15070000	13401000	13601000
5301500	5639900	5724100	6380900	5672900	5940700	5187400	5401000	5643100	5998400	5806500	5758900	5546700	5361100	5524500	6895100	6565000	6881700	6301500	6642200	6259100	6142500	5685300	6232000	5936500	5646800	5951800	7117100	6915600	6915600	5665100	5273200	5363800	5947500	5698500	6439500	5904800	5588000	5550700	6069600	6111400	5666300	6152800	4249600	5309700	5804200	5870600	5768500	5342600	5602000
368330	392350	445990	396600	394790	462880	467560	438390	493160	426030	401680	415290	379850	490690	489000	397800	471490	411960	428340	413390	311630	379870	403870	334550	386340	361390	386230	479250	369330	489220	307760	491530	460250	441710	343490	512950	522380	353210	377420	426110	259680	387130	439430	385370	333670	473760	368490	468010	495770	401200
984600	1281300	1175100	1370800	1337100	1263700	1248900	1415200	1202200	1270000	1306500	1269900	1279600	1435000	1441700	1485800	1259400	1530500	955220	709380	721140	1285800	1060100	1309500	1325600	1374100	1323800	865430	1380700	1427500	1376600	1316600	1366500	1263700	1259900	1313400	1537400	1179900	1537500	1484300	1211600	1396100	1318000	1239400	1460900	1573100	1008600	1265900	1290100	1371600
238980	284520	285410	62592	279860	308180	273980	298260	309490	305860	221430	257630	224460	249470	248480	195630	162930	99904	308130	267400	314660	352780	245890	275010	267280	293740	338310	214610	230550	40621	120720	228330	125390	227510	201560	232380	265000	210530	270350	204620	228600	264180	0	233660	96766	198820	141390	215450	206760	184360
879300	920690	891970	940350	906200	913470	955040	918560	798530	1014000	1039000	922820	899710	645150	813130	850490	831480	882510	1022800	1150300	823870	931540	829210	851250	918700	857590	1085600	985410	768860	909360	812240	791880	527790	764840	835400	810050	847620	817780	863090	846200	762710	710830	883190	751210	809760	806750	732830	836000	706990	849180
1468300	1681900	1697000	1579600	1592800	1812000	1493100	1541700	1585600	1535500	1456200	1532300	1409300	1494200	1514400	1705400	1515300	1497400	1472400	1636500	1638200	1589200	1580700	1687500	1652000	1531700	1604100	1728400	1655800	1770100	1525700	1597800	1663000	1519500	1694400	1669800	1650500	1655600	1680700	1762000	1289000	1475500	1400200	1419000	1627900	1478100	1537800	1527600	1356000	1367400
152210	297840	144010	181310	239410	253960	60378	213410	176890	230940	34931	232340	220820	237790	195660	267970	271480	123010	45025	181880	238250	127890	166250	233400	74097	84498	81334	243440	256070	209410	145480	156970	134290	222150	71175	40435	204700	271860	57591	193090	137950	221420	27564	162310	187350	205200	48171	63108	146380	232740
1078700	978830	821330	634110	801340	676930	663330	923170	791370	731760	711060	662740	924960	952360	1286200	1107500	924240	811450	898940	1030700	943100	469460	931380	1039100	798860	684780	1064100	792390	855430	928250	789750	749040	728740	544630	439890	545370	848740	554890	703520	645680	947890	847080	809110	646150	1038500	511990	618350	692410	871470	582950
2129600	2376000	2700800	2175900	2149300	2301700	1932200	2063200	1981300	2090800	2101700	2110800	1664500	2093400	1871000	1255500	1905700	1649900	2406900	2140000	1872300	1811500	2003000	2153800	2056500	1909200	1846200	2102300	2010400	2539900	2285400	1952700	2408300	2814400	2790700	2610800	1785700	1866700	1423100	2045400	1645400	2000900	2889900	2513100	2686100	2681600	2001800	2425600	2106900	2490300
1288000	1560100	1381300	1581100	1453700	1569700	1353100	1487700	1432500	1477300	1519600	1505800	1488000	1439900	1484600	1507900	1522500	1474700	1654500	1481700	1698400	1486600	1517900	1670200	1456000	1411600	1473000	1452200	1414300	1453500	1470200	1545200	1511500	1308600	1328700	1634000	1494200	1376100	1166500	1612300	1438300	1391100	1536900	1300700	1414500	1426200	1361100	1383000	1537900	1486200
0	44107	122230	48738	80775	0	42358	0	0	0	0	0	0	0	0	0	72469	31302	43934	101470	0	116720	0	0	0	0	0	0	0	0	0	0	0	0	27142	0	538620	0	34643	44220	57192	47106	0	0	0	0	53901	59294	0	0
43562	47556	54227	129110	120730	0	101530	46195	91899	64980	93107	22587	23144	30409	26206	22237	45718	109980	29724	85766	0	0	6352.3	53383	33794	65102	30901	40006	27412	17982	20084	115530	52152	23757	14486	12144	0	36937	46356	4039.7	35724	83921	26213	35791	43507	29032	47920	57590	31774	0
759390	646880	696400	814440	766110	786380	651550	759210	689370	805050	750860	661400	728020	749390	670840	714480	236410	632750	551540	716320	712850	468080	667310	607510	228320	678220	414390	718250	677350	243510	1052800	531330	607230	645790	842220	672930	623420	601870	787590	663810	276870	509010	664520	557860	738850	741270	713350	660450	671770	778600
37553	70635	72417	75123	32745	76426	127990	45877	113610	138660	94866	54820	53955	99256	24577	156030	86721	23042	110610	43097	51382	63340	51325	60198	0	111420	119830	53493	103930	99270	62079	0	0	0	33276	0	57199	44372	92241	24791	60739	29309	88749	0	0	0	0	0	20853	50145
0	0	0	0	0	0	0	0	0	0	0	0	0	0	0	0	0	0	0	0	0	0	0	0	0	0	0	0	0	0	0	0	0	0	0	0	0	0	0	0	0	0	0	0	0	0	0	0	0	0
501380	583520	574910	566680	611420	581710	698350	611230	586250	514070	607580	603560	588800	570630	506880	340960	523980	677160	607610	694480	469410	549570	590830	601730	630720	550990	588820	540490	618080	678220	627420	615420	549970	607360	556470	562240	694880	657590	716500	725980	779250	690410	612290	569710	624240	696980	600070	561890	653510	591520
764990	832610	873020	861010	863930	805710	921960	854660	906270	866370	770960	925050	810310	932340	898320	897350	893080	894610	917860	961830	1137700	961910	985490	1033300	844220	938030	952880	901060	858230	933310	873520	878720	916970	750900	845930	908870	834420	824930	909740	901440	884590	883810	924310	835840	826080	865400	792220	876080	841910	843030
913900	1207500	1338400	1167400	1164800	1160400	1088700	1200700	1068000	1371300	1354500	1403200	762400	1022100	1109500	702580	1119300	1137100	1006000	1095800	1443500	1176800	507460	838080	924700	893180	999490	1225200	1243400	1122400	1084300	1194600	1236800	1309600	1352900	1292200	1164200	1044600	1019800	1211200	1158700	1185300	1150700	1046800	1009600	1244300	1253500	1100200	1016200	1318700
2878000	2852300	2444900	3143500	3065900	2739500	3034100	3160200	2701800	2851600	2425700	2324800	1990900	2645700	2397000	2234900	2623900	1854100	2969900	2385100	1760700	2837200	1864200	2818200	2252800	2161000	1899300	2633600	2707300	2470600	2498000	3001400	2434300	3725500	2280700	3313600	2773300	1710600	2677000	2471900	2016900	2778600	2736200	2485800	3172800	2502400	2834300	2222000	2355000	2682100
2041600	2378600	2346800	2182300	2090800	2062800	2292500	2240400	2053400	2068800	2054000	2151300	2108900	2181700	2147500	2330700	2184700	2189600	2146900	2077900	1881700	2090500	2092200	1961900	2180700	2256600	2142900	1965000	2005100	2154700	1982400	2048200	2131900	1956900	1898300	2124000	2007900	1948200	1819600	2148300	1981100	2233400	2227600	1902100	2093400	2081300	1875200	2012400	2047800	2013500
1085300	1136300	1280500	1305800	1226800	1219600	1243500	1139000	1218400	1286600	1144400	1303900	1144300	1248500	1208600	1093300	1276600	1111100	1200300	1388200	1300500	1228800	1148400	1213300	1199100	1200200	1028000	1133300	1327800	1146200	1203500	1058900	996140	933260	1199000	1148000	1159800	1178400	1108600	1146600	1296100	1215500	1065900	1156000	1239700	1075800	1050900	1045400	1093400	1122000
10110000	11286000	11183000	10182000	10622000	10410000	12083000	12249000	12315000	11257000	11795000	12883000	12803000	11741000	11638000	12105000	11350000	12438000	10811000	10293000	11451000	11363000	11743000	12009000	12392000	11615000	12753000	11475000	11176000	11237000	12015000	10621000	11899000	13210000	11857000	12472000	11298000	11960000	11781000	11795000	11840000	11545000	13901000	13004000	14132000	12309000	11764000	13134000	11815000	11125000
552990	504750	567410	308770	343950	595970	505520	504480	528550	512880	515920	386760	297500	184340	182220	218410	184590	396700	609300	740560	654680	602040	586030	532400	428870	195290	347600	439460	516340	477630	438400	430330	472660	392960	578670	410940	300440	538230	491020	470920	475330	507460	258520	430890	281270	361500	405190	535950	603560	458120
33539	20068	65493	56462	83921	41496	86930	65559	0	73624	38745	509880	143870	34995	78278	85072	57349	81290	35236	55854	33313	43186	14505	61532	108030	55950	167040	57121	62249	99681	80048	81897	149420	36328	130330	184150	56227	184160	85289	54698	162010	37908	56377	0	100030	15572	51928	65573	0	46991
252190	223320	207120	220780	202440	233690	167600	272110	223380	189100	224090	124900	288150	152620	275250	216500	184150	196180	217130	59500	197440	273460	252810	272200	101860	191040	209450	129230	129010	72525	256020	139170	203660	221760	61489	91739	255040	189570	49218	185760	169270	57585	217730	55319	205080	151060	64048	233160	183680	258770
0	0	0	0	0	0	0	0	0	0	0	0	0	0	0	0	0	0	0	0	0	0	0	0	0	0	0	0	0	0	0	0	0	0	0	0	0	0	0	0	0	0	0	0	0	0	0	0	0	0
4341100	4912900	5128000	4689500	4621800	5208800	4948600	5207700	5341700	5030300	5149500	4720000	5695100	5340800	5670200	5269400	4681200	5301500	4736000	4438800	5015100	5054700	5898100	5442400	4818100	4840000	5675700	4855300	4403100	4691800	5122900	4803900	5163700	4704000	4648400	5041500	5557300	5203100	5083200	5186400	5158500	5380700	5639000	5291100	5314200	5256100	4851000	5320400	4755100	4685900
116310	79979	70092	0	24889	0	34350	114410	39328	0	26514	130020	127760	0	0	0	160000	114840	0	14828	77952	113660	0	0	99486	114410	116950	0	106120	0	0	91658	0	26897	76110	120750	0	39807	29862	46131	219890	110690	11837	121050	137290	40651	99227	0	67494	142760
1557000	1880500	1781600	1717700	1722600	1623400	1639000	1757800	1610900	1712300	1769500	1677300	1786400	1801000	1811700	1846700	1799200	1900000	1748700	1557000	1851600	1882000	1966100	1909000	1806400	1612700	1785000	1474500	1592400	1685300	1624600	1541700	1620700	1497900	1651200	1735600	1668900	1716000	1835200	1791700	2019600	1910300	1563900	1492400	1582800	1491000	1457600	1501000	1457900	1502800
424510	395930	218900	403580	75866	434450	343090	223650	133990	270500	419480	58699	432360	250870	453170	555470	402960	507110	455840	292190	115980	455250	292750	439600	422520	458910	485340	506200	443460	381540	313830	409380	350820	255080	378360	335780	299630	432990	416930	500210	560610	355360	282150	343320	284300	430270	534820	496250	191550	252860
642180	914900	839410	904050	930840	747160	733300	664840	645170	699470	643980	726650	752230	606430	910730	1067100	846740	1158500	693810	738150	656940	819400	739590	652070	810470	670810	841790	963600	852200	792530	738910	698460	652560	688780	760470	629280	694270	753020	732570	772850	728630	837590	797360	815660	714830	821490	754920	785550	603540	557790
514000	542540	578530	584460	287400	520630	584440	711310	504010	601880	566490	431060	697160	594140	543480	633250	591810	482600	527420	571440	376090	617020	611740	621110	623590	606620	629410	494630	626900	466530	577740	566280	639580	450580	528010	516520	510400	685950	394390	565280	440630	390000	520290	635600	756160	397630	442010	540070	524710	543510
0	0	0	0	0	0	0	0	0	0	0	0	0	0	0	0	0	0	0	0	0	0	0	0	0	0	0	0	0	0	0	0	0	0	0	0	0	0	0	0	0	0	0	0	0	0	0	0	0	0
4178300	4832200	4460900	5118200	4579600	4610100	4738100	4506600	4897400	4825500	4593300	4670100	5500600	5062000	5409000	5235000	5223800	5100400	5015300	4902000	5161700	5075000	4481200	4887900	5232400	5177700	5327700	4799800	4637300	5255900	5035700	5176000	5044600	4686400	5035800	4866900	5145600	5322900	5232000	5142900	5527400	5082200	4964500	4974400	5036200	5029900	4772500	4912300	4934000	5005100
168590	99890	191630	105510	121810	97788	282230	153450	164050	135550	166640	41141	189380	199120	124570	118520	171200	182290	200500	208930	166420	137360	176180	54847	183740	209630	203300	128240	116350	35989	38526	234350	198400	145000	160150	119140	189870	150710	199430	131250	142440	90354	197000	189520	204880	176740	112610	119710	142310	147650
77082	167760	38284	151790	32899	91317	100450	44320	0	90133	0	23018	38197	37503	38609	0	0	31958	137740	0	51142	117620	17585	65384	0	0	0	20522	95051	0	25172	14506	46987	109510	24948	114720	0	60354	0	18356	52028	84506	0	0	24642	31754	55374	38216	11322	0
19489000	22037000	21094000	19870000	20346000	19853000	22334000	22674000	22408000	22005000	22006000	21770000	23908000	22407000	23733000	23318000	21125000	23082000	21303000	22211000	23738000	22120000	22587000	22262000	24205000	23622000	24223000	21293000	19901000	20458000	23275000	22143000	22615000	20216000	20001000	21642000	23330000	22761000	23190000	21212000	21714000	21696000	23993000	22717000	24271000	21733000	20359000	21894000	21725000	20658000
592110	477000	479740	524830	548630	583870	505470	488950	565410	576440	469180	531880	569240	565540	477310	519540	508540	715220	441720	505400	592170	432720	503160	495170	524190	522170	599470	486250	562710	485340	552850	389520	552310	300090	447990	475180	430370	338460	493640	456280	522260	584460	445480	395920	458890	415400	393590	443970	470740	473560
1264400	1273800	1079100	701800	1684600	1602100	1622100	1365000	1940900	1503000	1706900	626820	1744600	905790	1707700	197800	1497100	845660	1792700	1914000	1888300	1550900	1509600	2157800	1446100	1356400	1734600	1745100	1380600	1303800	2040600	646560	646760	1619400	1616300	1388700	806010	1416800	1096800	992360	1810700	1553900	1849800	1725500	1045300	1557500	310230	1448600	1871200	1314400
0	0	0	0	0	0	18400	0	16405	0	0	0	0	25195	0	0	66116	0	0	0	0	0	0	0	0	20465	0	0	0	0	0	0	0	37578	0	0	0	0	0	0	0	0	0	0	0	21832	0	0	0	0
438500	432750	486740	419430	479930	297720	446250	461560	489230	477400	536340	597750	533870	460940	403460	460540	544560	572340	543340	385920	335780	368120	389510	246310	499760	502480	485990	455870	430950	356360	455760	340480	300320	383740	472110	429660	320660	399640	481260	392190	434640	261410	445480	472550	422930	440760	379450	209310	586690	453850
0	0	0	0	0	0	0	0	0	0	0	0	0	0	0	0	0	0	0	0	0	0	0	0	0	0	0	0	0	0	0	0	0	0	0	0	0	0	0	0	0	0	0	0	0	0	0	0	0	0
3112000	3308300	3302500	3411900	3382300	3454300	2988600	3197300	3169000	3175800	3140000	3448800	3212400	3261800	3406000	3633200	3643000	3828100	3849700	3531100	3677700	3468600	3495800	3571200	3466100	3265500	3457400	3507000	3309200	3531900	3117500	3128700	3245700	3077200	3391900	3320200	3455700	3519900	3661800	3531600	3669600	3373400	3356800	3247900	3418600	3266500	3372100	3362500	3102500	3194200
254320	334420	258050	310380	325210	293670	436050	461900	395630	352460	350480	405160	288470	405170	423220	342110	104650	451590	458190	410310	394960	410900	392810	379760	410190	372160	390920	316420	305770	282960	393830	255590	384670	111910	210100	502850	295860	402110	396670	83633	301500	375660	456550	396130	411340	332690	91551	423430	377370	199930
211030	405010	341820	327250	602370	289070	395320	161860	413890	352630	313710	342950	332200	277560	295430	233250	224150	155770	392540	382730	360060	396510	270280	284170	213190	267320	189510	409350	317100	482750	380190	196250	312720	271670	356370	419340	416100	320960	213920	448740	408340	377520	262050	328620	323890	445730	348350	324570	237850	183620
553900	421210	519200	306540	699960	590240	497130	522690	520620	404230	530360	251160	487810	209460	157300	575650	569380	562430	548030	547030	366410	533990	369020	180690	413680	441340	523000	511480	467640	542480	638670	546030	260990	386870	590850	490380	544750	284460	553760	569720	715450	635340	402410	358250	474450	952740	421600	555740	746780	643620
0	0	0	0	0	0	0	0	0	0	0	0	0	0	0	0	0	0	0	0	0	0	0	0	0	0	0	0	0	0	0	0	0	0	0	0	0	0	0	0	0	0	0	0	0	0	0	0	0	0
697590	716180	765680	673540	692500	764680	894910	744130	777570	870150	842650	773370	857250	932320	908790	809980	804040	834770	585560	763040	678670	760400	796730	787000	931110	876620	957750	680680	709630	737950	830090	643900	810640	881020	614510	830360	732630	829990	797400	764100	782820	798340	852060	824230	955170	589100	630400	825600	709830	732160
77607000	82961000	85410000	91041000	86501000	88586000	90020000	90318000	89978000	90503000	88754000	93080000	98805000	96699000	97330000	100340000	98820000	101360000	96215000	94469000	96195000	90100000	89657000	92659000	102690000	98939000	100320000	94325000	95368000	94059000	97016000	90744000	94716000	95706000	91379000	91211000	95545000	91656000	98280000	91708000	93888000	90155000	102450000	95564000	98721000	93398000	86411000	92759000	93612000	91137000
25487	18448	0	0	46066	0	21739	67311	28823	0	0	21806	0	0	11685	52600	45724	2790.7	0	28237	0	0	0	22536	42660	0	24027	35089	10635	2123.1	0	0	37053	19109	0	28797	0	0	17913	0	24103	11185	0	0	0	11370	0	19749	0	19325
0	488870	745710	645360	0	13947	0	45281	0	554190	0	710940	0	787570	0	0	0	0	735100	0	0	1064500	722280	0	612770	541600	493680	378990	0	0	504230	0	622770	0	14842	0	0	0	0	41656	0	778630	0	0	0	0	646530	0	519990	0
1787400	2225500	1689600	1229600	2131600	1975500	2378300	2239000	2251800	2368600	2457500	2260000	3020400	2429600	2491700	2422000	2531400	2308400	2297500	2335300	2400200	2085800	2164900	2293600	2417000	2506900	2509200	2224400	2124400	2205700	2305500	2349400	2287600	1955100	2178800	2057200	2627300	2492800	2662900	2549500	2125900	2446600	2159400	2176300	2741400	2231100	2230600	1849900	2180700	2192100
508490	425380	456440	833520	499180	462070	359010	402030	182020	381750	418850	335850	349700	388570	341470	488790	380550	623390	370910	649180	730160	565990	479200	545130	413350	361150	314220	441560	369860	407510	475280	520660	488680	241730	357980	348550	402180	660310	488820	478000	246610	321060	228030	471300	270080	432750	239900	458320	307610	433280
279400	251450	294990	133520	273270	236670	356560	234240	260420	287450	281840	278100	325010	224980	252680	297210	284320	334110	238720	217330	220930	242320	171290	254840	259670	188720	237530	271390	306930	194370	249960	255680	234740	234930	239730	230180	157930	253350	320900	229140	227080	274960	269120	243450	321330	175940	256720	253670	246530	284740
356920	326530	243620	322660	265550	290600	444860	237040	313780	204110	329130	314140	294180	264310	306810	360090	304440	366980	235880	249170	276080	268060	129940	247930	298970	289890	267280	271520	301080	260860	172130	302990	276360	247760	220590	277190	147490	285290	236200	265040	323930	286970	309630	244550	320570	332530	305620	265590	236020	218270
291690	237970	316430	325400	342780	261000	339150	274580	256660	256750	282750	198590	246250	193750	278580	91902	264890	216100	262710	280990	236640	295210	172140	169170	381820	248690	132450	299860	63548	292090	241800	249440	229920	249510	194790	435340	271000	283650	283230	268220	274420	289430	221190	305330	322780	288110	142390	270690	176840	137760
633920	747050	703800	622770	358450	463000	643710	537820	561300	504290	552790	594860	693340	538690	706840	572930	409850	598800	377900	181380	667200	535670	620580	835790	660260	449820	655970	659060	612490	550240	758010	490040	525250	788820	575150	624670	503460	584530	709460	609000	502800	600700	409720	527760	753730	520390	439620	528870	394180	688720
63065	76578	91187	97144	87399	101430	81396	89382	104030	133210	83693	80979	82718	66237	142640	0	108850	0	81014	77457	127660	0	148420	45891	55555	116360	37002	77544	63848	49362	108570	0	43143	265030	0	0	78516	134510	47091	0	103290	0	117690	0	154180	161280	0	0	0	128020
250010	313500	258520	195480	60250	233340	251260	267000	344970	250740	367140	259330	335100	272210	299390	168950	228640	286440	231220	105510	210880	283380	275010	272450	282970	277200	361110	218210	218550	234220	241140	97053	194480	212250	211720	198780	256500	242840	0	222480	132720	297430	242240	248420	287780	157410	176530	209690	190710	184730
143130	176040	34829	185690	163860	44249	95059	191200	183210	173790	104450	193590	86188	149350	157710	107540	51249	105770	217120	218560	225060	180160	79770	224700	172510	88470	169220	172380	90886	136650	156470	160920	181380	189710	229090	234540	207770	162250	28028	183840	210720	214200	191670	178380	200800	190220	188800	169190	177060	157860
0	173920	0	193210	135030	550480	705440	0	329860	187130	291420	195800	275770	263370	262110	315090	0	457380	186060	347060	129870	30275	11337	0	236050	153050	268240	442010	509070	299540	492050	299400	261050	404030	519650	219630	131620	275260	265370	214740	306740	360320	593460	353270	288150	278700	88425	311040	253530	0
9199.1	0	0	0	24437	0	0	33898	34995	0	0	0	0	0	0	0	0	0	0	0	0	0	0	0	0	0	11243	0	0	0	0	0	0	0	0	0	0	0	0	28793	0	0	17861	0	48070	0	0	0	0	0
0	0	0	0	0	0	67122	0	0	0	100930	0	0	0	0	0	0	0	0	0	0	0	0	0	0	0	67593	0	0	0	0	0	509100	0	148750	0	0	66913	155040	135720	0	79790	0	0	0	0	0	0	0	0
360160	374680	454950	431670	431110	427610	443150	372060	318920	402580	429210	317360	309500	494840	521520	513670	454660	450450	481910	450910	461880	515330	470690	591090	457190	416520	434310	349720	427630	293880	378900	442310	396620	419600	332650	159240	416140	339090	441370	356810	487200	284190	403230	366070	371570	281250	331720	407580	267540	358200
6742900	7180800	8145000	6928300	7056100	7020000	7760400	7047500	6979600	7643800	7982400	9265300	8439200	8299300	8043300	7579600	7596800	7549600	6893800	6720300	7837200	7545600	6676000	7880500	7784600	7617800	7388900	6758600	7274500	7341300	8173800	7461400	7815200	7969000	6912300	6764300	7626000	8431300	9013000	7856200	7939600	8272600	9364600	8244400	9311000	8802800	7532300	7383900	7061300	7338900
370480	299950	129540	392330	498230	428620	181820	417000	460980	449780	380890	466920	446450	376830	441870	465090	476240	440930	450400	341640	482610	416180	435440	436750	451780	203660	379740	344280	445620	434810	416090	301650	490200	253260	448820	421820	197700	379030	353350	455810	444920	429600	353970	510980	581600	679290	381070	383270	278680	382540
367280	545230	432250	446270	413750	654670	522040	424820	665300	590670	672520	616520	615200	563340	672400	753330	720900	605070	583280	755090	428170	603290	785540	860910	590190	655870	587320	437280	528300	457610	613520	661980	586710	334530	405800	503980	587870	222630	523920	511510	592470	568050	577470	517000	677530	493450	546150	615420	503690	429830
0	43576	71278	49121	28284	40438	24772	0	56779	0	24380	0	24609	49823	84855	0	0	52283	13519	0	0	65094	33053	36567	0	0	0	29801	29211	49463	0	0	29735	25593	18439	41763	17627	68717	73011	0	56100	39942	0	89070	55202	0	52745	81883	0	0
2766400	2917100	3040500	2948900	2950500	3093200	2928600	3057500	3085600	3078000	3028600	3393700	3524600	3304700	3520000	3441600	3153600	3275500	3141700	2939000	3285700	3205500	3052900	3183500	3194900	3243200	3232700	2982200	2999000	3120300	3282200	3082200	3102100	3048200	3317900	3279200	3338600	3293900	3190000	3117900	3087000	3111600	3376900	3080400	3845500	3427900	3026400	3223500	2982300	2993800
121400	227960	152770	95240	368370	188980	342240	111390	49276	86933	254330	206340	236080	42040	285290	86170	144760	216440	89104	153780	53686	120410	154690	73393	68125	77016	292710	0	114140	201930	154170	162590	330580	41940	71165	258850	0	183400	181060	179240	268640	302510	137560	141950	215470	28951	201190	143980	59975	279850
0	0	0	0	2985.8	0	0	0	0	0	0	0	0	57396	0	0	0	0	0	0	0	0	0	0	0	0	0	0	0	0	0	0	0	0	0	0	0	0	0	0	0	0	0	0	0	0	0	0	0	0
0	0	0	0	0	0	0	0	0	0	0	0	0	0	0	0	0	0	0	0	0	0	0	0	0	0	0	0	0	0	0	0	0	0	0	0	0	0	0	0	0	0	0	0	0	0	0	0	0	0
1101500	1296600	2549600	2938300	771260	2518300	1791500	2661600	2194800	2351200	546920	1942400	1086700	1606800	1253300	1283000	254250	1471500	2894800	3533800	2825400	2153000	1888700	2332400	1527800	251610	1188500	2071600	1771300	2000900	1204200	695370	574290	1236400	2262000	3012300	1865300	1629900	1915900	1589200	700080	1876300	1535900	1774400	1934300	2371300	2271500	2334100	2512700	546050
8568000	8489400	9717600	9956600	9316500	9558800	9448500	9024700	9643600	6585300	9700900	8385800	10767000	9580200	8829900	8573900	8543700	9255100	7079200	7168300	7905700	6109900	6279400	7487200	9771600	6670400	10131000	11054000	11012000	11118000	10857000	10240000	10026000	8449000	10136000	9868800	10554000	9846500	7382300	10105000	9038700	8122000	11717000	10724000	10965000	10627000	9687900	9413900	9826200	9587600
2295400	2463400	2587100	2971300	2621900	2976000	2500600	2203800	2989500	3193300	2754300	3167500	2853800	2533700	2571200	3048900	3179900	3042600	2904200	3101400	2522200	1802900	2343500	2677900	1620800	2475300	2244700	3154300	3127100	3317500	2733900	2877100	3033500	2365100	2407400	3520200	3027400	2698900	2787000	3022500	3088700	3209800	2210600	2430700	2318100	3072100	2557200	2199400	2633900	3197300
0	0	0	0	0	0	0	0	0	0	0	0	0	0	0	0	0	0	0	0	0	0	0	0	0	0	0	0	0	0	0	0	0	0	0	0	0	0	0	0	0	0	0	0	0	0	0	0	0	0
5226400	5140700	5385400	5611200	4934100	4594800	4459900	4893000	3594600	5263000	4868700	5387500	5535000	5281500	5659900	6893400	6760400	7117400	3655800	4075400	4265500	4885800	4906000	5073300	5613200	4846000	6180600	5928400	6366200	6384600	6812500	5596800	7085300	3414800	3774300	3360400	5268200	5417000	5642500	5213500	4987300	4843400	5671600	5790400	5385100	5463200	5348000	3287900	7186100	7121000
0	0	0	0	0	0	0	0	0	0	0	0	0	0	0	0	0	0	0	0	0	0	0	0	191680	0	0	0	0	0	0	0	0	0	0	0	0	0	0	0	0	0	0	0	42981	0	0	0	0	0
22637000	24574000	24755000	24010000	25235000	25527000	22223000	22143000	22084000	23230000	22980000	20753000	24172000	22427000	23888000	23491000	21110000	24219000	25136000	26382000	26560000	22695000	22799000	25580000	23570000	22033000	24080000	25056000	25569000	23961000	23286000	22461000	23177000	24096000	20886000	23687000	25214000	23219000	24891000	21521000	21913000	21014000	20733000	20094000	21205000	20040000	18844000	20426000	20637000	20371000
602810	579970	593160	614190	572310	612940	1127800	1197600	1354400	1494900	1528300	1792100	941760	558040	667750	962070	1024400	971940	465890	489470	315330	318410	341920	413360	378430	400300	391540	338390	484580	344860	275720	433590	252320	208990	393030	280770	405200	438140	404680	488690	480060	517200	715360	596290	692040	884970	792640	745740	534890	476000
0	12865	7413.3	31732	17136	28683	104820	38498	40298	36296	24206	160190	35633	22091	23894	8890.5	17374	21056	0	0	42037	15245	12162	33472	18157	30221	25023	18731	0	38920	0	0	9769.8	0	11067	23972	0	0	0	28358	7465.3	30903	23335	23274	97384	0	44294	18585	17422	0
0	0	0	0	0	33028	0	0	0	0	0	0	0	0	0	0	0	0	0	0	0	0	0	0	0	0	0	0	0	0	0	0	0	0	0	0	0	0	0	0	0	0	0	0	0	0	0	0	0	0
0	0	0	0	0	0	0	0	0	0	0	0	0	0	0	0	0	0	0	0	0	0	0	0	0	0	0	0	0	0	0	0	0	0	0	0	0	0	0	0	0	0	0	0	0	0	0	0	392.29	0
19062000	26643000	20009000	24588000	27410000	21330000	26824000	25408000	27042000	27219000	22899000	28524000	34529000	25802000	27927000	27659000	28116000	24831000	31745000	26346000	29081000	20908000	23540000	26725000	30418000	22895000	31553000	30150000	26478000	28374000	33184000	29888000	27045000	34675000	27156000	36985000	31898000	32476000	30892000	33170000	22552000	30587000	41028000	28960000	39646000	35367000	32143000	36547000	31059000	30637000
0	0	0	0	0	0	0	0	0	0	0	0	0	0	0	0	0	0	0	0	0	0	0	0	0	0	0	0	0	0	0	0	0	0	0	0	0	0	0	0	0	0	0	0	0	0	0	0	0	0
0	0	0	0	0	0	0	0	0	0	0	0	0	0	0	0	0	80515	0	60215	0	75197	0	0	0	0	0	0	0	0	0	0	0	0	0	0	0	0	0	0	0	0	0	0	0	0	0	0	107780	0
433620	258990	334470	101090	115430	186990	258540	188600	266790	298930	412320	637940	93713	155590	149450	231400	405370	175840	118060	102300	43346	52784	77732	156030	76816	111930	110480	314590	47269	168550	103690	65291	74448	60572	85145	73275	61415	0	63999	64379	52356	50540	284900	127080	159180	187480	111530	326610	235490	154700
217530	227200	257940	239300	204920	236770	81464	90916	71415	97047	95644	137700	64783	82834	75118	87269	59251	64649	240880	170240	259810	251520	177530	250710	238580	300060	238940	296790	266540	319460	232260	172060	166730	222290	231780	239690	438400	552120	517040	558580	645290	577220	20574	33245	53177	34899	24934	22855	275190	279500
0	0	0	0	0	0	0	0	0	0	0	0	0	0	0	0	0	0	0	0	0	0	0	0	0	0	0	0	0	0	0	0	0	0	0	0	0	0	0	0	0	0	0	0	0	0	0	0	0	0
0	0	0	0	0	0	0	0	0	0	0	0	0	0	0	0	0	0	0	0	0	0	0	0	0	0	0	0	0	0	0	0	0	0	0	0	0	0	0	0	0	0	0	0	0	0	0	0	0	0
39471000	45569000	38962000	40706000	40295000	39838000	66850000	62378000	64241000	72754000	80071000	90810000	60157000	57507000	55819000	66915000	65386000	68048000	45635000	39047000	46272000	45067000	45326000	46732000	48980000	41996000	49910000	49674000	50024000	43671000	36259000	30910000	34528000	40208000	33496000	39010000	36009000	32348000	34950000	39123000	44133000	43426000	39284000	39044000	40198000	35383000	32086000	33803000	48195000	44038000
77895000	86542000	91977000	82254000	81398000	80307000	98968000	104830000	109610000	132480000	133110000	146540000	110080000	105940000	105520000	122740000	119060000	126650000	84524000	79880000	86727000	80192000	80275000	82137000	82555000	81984000	83390000	88100000	82814000	89185000	64430000	60672000	62901000	71572000	66792000	68927000	70380000	66700000	72347000	84776000	78011000	76252000	62172000	69612000	82001000	66239000	65314000	63857000	84654000	83908000
342670	512640	452760	733960	565810	432550	496330	453070	555370	573600	460130	326630	493630	422660	967670	429530	303500	307300	725180	485740	590580	815590	665660	724740	862270	553200	695460	1009700	776810	684560	983600	1055100	629350	1619300	1408000	748700	369210	332010	320380	658700	677980	360080	1238100	1067800	840560	1069600	605740	541690	1131900	507290
0	0	0	0	0	0	0	0	0	0	0	0	0	0	0	0	0	0	0	0	0	0	0	0	0	0	0	0	0	0	0	0	0	0	0	0	0	0	0	0	0	0	0	0	0	0	0	0	0	0
1312500	1383700	1422100	1540600	1545700	1529200	1404400	1398500	1324800	1527600	1414300	1515900	1402100	1494000	1651900	1765000	1521000	1639900	1392400	1663500	1509100	1742800	1563700	1546500	1529200	1394400	1522100	1400500	1345600	1371700	1423100	1372300	1303900	1329200	1388900	1401100	1169900	1127200	1325000	1455300	1550300	1430600	1292600	1309100	1411500	1515100	1491300	1623500	1353700	1360400
299470	368800	368520	125270	386850	206490	76917	52131	99160	1004400	912380	828030	127070	80635	121330	257090	137180	149700	630910	534760	84186	251800	211570	137910	72083	87491	78442	148650	226760	81867	306040	59732	0	24778	83202	156810	1814400	2045700	1665000	145950	85199	90978	197550	147080	322200	285980	108210	63265	426130	184640
1009200	1113800	1392500	1146200	1140200	1175500	846880	710050	1087400	965100	1247900	1030000	1055600	662990	1493200	717250	1471200	1346800	1149100	1264700	1485700	1155200	998010	926940	981180	1498100	1289400	1200000	1258400	974330	1314700	936160	1412100	1001000	1089200	1034600	1538200	1129700	1446000	1389200	1331200	1387000	1783400	784360	1318800	789470	1389400	1188000	1271000	1212800
0	0	0	0	0	0	0	0	0	0	0	0	0	0	0	0	0	0	0	0	0	0	0	0	0	0	0	0	0	0	0	0	0	0	0	0	0	0	0	0	0	0	0	0	0	0	0	0	0	0
0	0	0	0	0	0	0	0	0	0	0	0	0	0	0	0	0	0	0	0	0	0	0	0	0	0	0	0	0	0	0	0	0	0	0	0	0	0	0	0	0	0	0	0	0	0	0	0	0	0
0	0	0	0	0	0	0	0	0	0	0	0	0	0	0	0	0	0	0	0	0	0	0	0	0	0	0	0	0	0	0	0	0	0	0	0	0	0	0	0	0	0	0	0	0	0	0	0	0	0
471290	638290	836540	414160	282510	515710	658340	785560	759920	456280	628740	560390	926530	286460	733300	759460	466510	627070	400150	578940	697740	408660	642770	353510	511870	473890	589940	818160	411310	434880	674280	433940	450750	490200	321010	413230	453530	664240	801030	592640	843080	470670	224010	534750	664700	876470	382900	552230	463060	414890
499720	387660	537940	677480	780910	762620	892910	371550	256220	884280	833670	291930	798280	399830	718690	882090	261870	334310	714340	576080	680090	497290	292960	175090	930380	705980	252910	916060	738650	457520	1034600	439390	395480	353060	426380	667030	709750	852530	209230	800760	417630	395150	239380	111790	125060	593860	103640	263040	1066200	580940
1355900	871630	1426300	1110300	1567200	1838600	1128600	1611700	1590200	1722600	1668700	1655200	2282600	890970	4305600	1758300	1070600	1217100	1082900	1682800	946450	1473500	1376900	275840	1893800	1954900	1911800	1679800	906230	1794700	1147100	988040	1780200	329330	1703300	1919000	1476000	1898600	1196100	1382300	1451000	1481800	2346500	5625900	5425000	440470	3202100	1556400	4820100	1793400
0	0	0	21886	0	0	0	0	0	0	0	31791	0	54732	13562	16671	0	215160	25255	73897	67815	10301	0	0	0	0	0	0	8348	0	0	0	0	0	0	0	0	166800	221430	188990	101250	49189	0	0	0	0	0	0	0	0
14773	60153	0	30937	40308	79878	0	41391	0	59620	37795	31535	75089	56080	77838	144360	58258	19391	37642	44686	0	0	63137	78178	0	0	0	0	0	114380	0	0	67378	33781	37811	0	43232	46781	57144	35556	0	102040	0	44641	0	0	0	0	122100	0
6480000	6973200	7194100	6460400	6846200	6830600	6379600	6828700	6753300	8258400	7974400	8435500	7087900	7053900	7339800	8491200	7858900	8006900	7348900	6468300	7371800	7704300	7841000	7846700	7584200	6763900	8032700	7451100	7524100	8093500	6462300	6554300	6362500	7199500	6885800	7200200	6298000	6224200	5778200	7144200	7761600	7293500	8417300	8618600	8379500	8308300	7995300	8544200	5922400	5699900
541460	866150	531980	459930	540480	507600	257650	308490	268900	835100	818280	731050	287890	96877	287840	364600	418110	212240	865420	811160	865320	353580	351300	351180	217700	115020	181280	383640	351080	272830	297670	219910	287400	417780	370740	647160	14601000	14137000	15175000	379030	408340	583390	498450	64508	386130	425580	250640	191980	712050	709530
0	0	0	0	0	0	0	0	0	0	0	0	0	79509	0	0	0	0	174870	74439	557940	0	0	0	0	0	0	0	0	0	49097	112670	32659	0	0	0	0	0	0	0	0	0	0	0	0	0	0	0	0	0
107040000	110760000	92456000	101980000	94916000	101970000	72560000	86215000	76668000	83816000	90912000	81678000	101300000	96369000	106600000	113800000	110400000	110300000	96614000	100160000	91015000	99659000	99043000	92461000	107450000	96604000	106510000	115900000	114410000	111780000	105310000	91526000	103860000	93100000	102350000	95393000	83431000	93700000	94538000	89771000	85264000	91681000	100990000	103640000	101470000	89789000	90834000	95130000	94521000	93245000
319720	339620	313680	271220	77568	265770	310870	318570	360980	289870	359380	341600	383490	348020	422220	206610	161810	358300	419230	246020	220790	340640	348600	347130	304000	180610	214360	418480	339800	347000	417410	226560	264790	331310	287730	346330	173350	377680	352340	333030	281380	269460	397890	396620	408220	335070	216850	406320	303140	236740
390400	394330	435110	332690	450470	388470	592720	621070	848130	1016100	770210	873470	662780	533600	505260	752130	664250	811880	382370	324730	417750	418470	422300	449640	431540	378050	380330	545680	500970	575450	330360	251790	287970	412020	430050	410770	376940	376260	251490	518400	267450	501630	240580	341190	225380	435420	324640	354730	467390	442110
1117000	728250	787590	0	966780	881590	729400	765230	882980	714180	846610	995480	850720	1064000	557540	1080000	951250	803360	1030300	966260	485930	797550	903850	1061400	883020	1365700	965420	842410	895300	1251200	1093300	1182000	790880	917010	823470	1045400	235710	1104000	852550	1192400	853140	1084100	606140	799900	1075500	1981500	2638300	1060800	720060	528930
56454000	62177000	59971000	57739000	57427000	58895000	56759000	56767000	56302000	57478000	54390000	57292000	63269000	61438000	60370000	60533000	62843000	63301000	56185000	50413000	56590000	60456000	57316000	58811000	62759000	63740000	62926000	60657000	60955000	62542000	58748000	57235000	60220000	61889000	60868000	61293000	62137000	61853000	63605000	63071000	59648000	58692000	68844000	64017000	68893000	60280000	65043000	58046000	56096000	54799000
77691000	97015000	91253000	91455000	90828000	90521000	91061000	88660000	85908000	86456000	85719000	84691000	101330000	98100000	104310000	93002000	89497000	97381000	81086000	90839000	92589000	91359000	91335000	95558000	98411000	89756000	95492000	93671000	101430000	92706000	120610000	112520000	114600000	144220000	130460000	133190000	104840000	95559000	91789000	98727000	98026000	101970000	124150000	122620000	139790000	136160000	123520000	124560000	107930000	110790000
1244800	1199900	1194500	1339700	1317800	1314600	1526800	1571700	1541700	1708000	1595900	1206000	1301800	1145400	1204400	1631100	1418500	1310100	1251500	1419500	1236800	1395900	902430	1268100	1402800	1283700	1460800	1732300	1655400	1719300	1535300	1340900	1369700	1635700	1491100	1838300	746830	1347200	1136700	1404700	1574800	1444600	1466300	1274200	1317700	1191300	1510200	1521000	1399600	1435100
50146000	57857000	55297000	56212000	56519000	56712000	54665000	54408000	54407000	53554000	53397000	53207000	60738000	57746000	57540000	57468000	54970000	59293000	58938000	49283000	52853000	53107000	53842000	55614000	56331000	53979000	58840000	57469000	57381000	57431000	60188000	58706000	59721000	58574000	58327000	63516000	59038000	60646000	61566000	59561000	56620000	56735000	61887000	60331000	64131000	60223000	57553000	60291000	56929000	56218000
52490000	58995000	58518000	59326000	58690000	60456000	58222000	60014000	56115000	58800000	61365000	63860000	69658000	65992000	65390000	58478000	57993000	59655000	62112000	58777000	65694000	61001000	60356000	65399000	65929000	60771000	67807000	65511000	66180000	65645000	70542000	60676000	71590000	67099000	64693000	71471000	71228000	68034000	63915000	64611000	62993000	62450000	73357000	67521000	71923000	68526000	62574000	65661000	62056000	63444000
330030000	350110000	382890000	381440000	361440000	381410000	372240000	356490000	369370000	366360000	368490000	386220000	411830000	410850000	417890000	410630000	398210000	421780000	363720000	382000000	379780000	376720000	372110000	377070000	408360000	412040000	405810000	419790000	419040000	418560000	459940000	433460000	447480000	446170000	425570000	446240000	411960000	433590000	459100000	415880000	405260000	392910000	497070000	474040000	468470000	446730000	441090000	464620000	433830000	428340000
1406000	1581900	1597600	1522100	1581000	1453000	1520800	1699700	1707800	1749900	1679800	1576700	1803300	1487700	1774100	1861000	1664500	1782400	1824800	1785400	1484800	1481600	1700500	1656500	1878300	1500200	1373900	1621200	1610500	1568500	1719000	1640400	1545900	2093400	1942200	1746400	1857700	1756900	1708500	1565300	1755300	1659900	2155600	1922600	2102100	1959100	1875800	1882100	1673100	1695100
508110	407040	496120	553360	464910	523080	434530	480990	427040	526140	825790	473210	621360	582730	570450	585780	407880	521540	535500	234130	519090	474650	471890	540020	605380	677810	622630	527240	579850	495530	491110	449050	517850	31124	418480	152670	625260	543800	593050	515570	253020	491800	1176800	479840	220060	415150	566090	496040	583270	512960
140640	65445	79758	287100	186820	102290	155790	103670	0	78479	0	304990	0	269360	141380	177130	99856	137590	0	68337	0	238040	220200	43732	212270	143650	148370	65166	231510	0	164730	232280	157140	174700	0	191140	0	38387	0	172480	239300	74450	212560	0	165700	180960	152940	337270	29888	0
0	0	0	0	0	0	0	0	0	0	0	0	0	0	0	0	0	0	0	0	0	0	0	0	0	0	0	0	0	0	0	0	0	0	0	0	0	0	0	0	0	0	0	0	0	0	0	0	0	0
16834000	17615000	18707000	18699000	17603000	16834000	19244000	19545000	18944000	18341000	17474000	18824000	19174000	17836000	18405000	17845000	15568000	19471000	20721000	18942000	19802000	19500000	18699000	19123000	19191000	17466000	20046000	18451000	18361000	18075000	22234000	20417000	20285000	21665000	21972000	20138000	18131000	17672000	18082000	18220000	19562000	18406000	25503000	23750000	24877000	22507000	24048000	22769000	20683000	20067000
87585	136410	68662	52837	158910	93347	67751	24620	18049	68112	100240	16730	73289	109230	94649	136240	108700	54665	143400	57188	111140	115770	141440	70941	169490	151650	99754	80621	39494	43579	145290	104870	90597	31707	54090	41747	103370	33161	48389	64451	52597	107780	27718	28118	65580	50987	81661	137020	172850	119830
31603000	36079000	37676000	36974000	33763000	35540000	33779000	31129000	35174000	36126000	34055000	36199000	37729000	35787000	36506000	38046000	37538000	36140000	39991000	37738000	41517000	35843000	36812000	37844000	37995000	37249000	37000000	37649000	36983000	38756000	37629000	36396000	37639000	39110000	41932000	40261000	36128000	38224000	39726000	39636000	38359000	36491000	41690000	39809000	40481000	38150000	37720000	43911000	36262000	35654000
0	0	0	0	87319	0	181090	0	0	0	139800	0	70172	0	119220	73951	377050	94443	0	0	0	0	178210	0	0	112560	0	0	101420	118230	179410	0	0	106540	0	0	85618	0	0	0	139970	0	0	127360	0	0	121830	0	0	165920
1640800	1650900	1586500	1462000	1824000	1593100	1440400	1103800	1373800	1704700	1750600	1725800	1306100	1516000	1672900	1787100	1629300	2568100	2121000	2627800	2174600	1770800	1827700	1811300	1190000	1304800	1234600	1593200	1675400	1586500	1514300	1544700	1471400	1724900	1858500	1612800	1284800	1424600	1579200	1564800	1385900	1869700	1177800	1415600	1481300	1492900	1476900	1385000	1315600	1364900
0	50125	0	49012	44755	25175	21855	0	0	39981	38763	23408	0	32309	0	34219	26559	16763	15414	57520	22514	28973	12367	23088	10662	0	29537	42111	4144.1	82844	30739	0	67077	13592	0	53014	19868	0	19434	0	0	0	18641	17045	16180	0	5728.6	0	32400	41476
11206000	13498000	14221000	13010000	15118000	16975000	17156000	15046000	16363000	16479000	18643000	16957000	13381000	10773000	13727000	21286000	20333000	20634000	14862000	14978000	15558000	17170000	17175000	11799000	15519000	13560000	16887000	17903000	17833000	12582000	16341000	12318000	16464000	16237000	13238000	16948000	15971000	15101000	17238000	16937000	15371000	16470000	18318000	17680000	17167000	18262000	15715000	17599000	16642000	15946000
0	0	0	0	0	0	180990	245630	120730	123830	106250	198140	0	0	0	0	0	0	0	0	0	0	0	0	0	0	0	0	0	0	0	0	0	0	0	0	0	0	0	0	0	0	0	0	0	0	0	0	0	0
241200	173720	270320	85395	229810	197940	450280	507040	413470	608380	698560	613860	169870	160450	355700	255820	316170	326900	186790	318670	240870	65871	513060	182740	166970	135720	88390	183540	264840	213890	183340	206540	83541	148190	254080	294260	127470	55914	136340	195220	208520	263170	174360	371610	350580	266180	328540	211520	131120	85940
0	25273	0	0	35353	192620	0	0	0	0	0	88266	0	0	0	0	0	213500	0	0	7698.2	0	0	0	103090	0	0	29354	0	0	21351	91075	0	0	3221.4	0	0	0	39450	0	0	0	0	0	0	0	9299.9	0	0	136070
245220	266150	328910	299530	168550	239460	33273	236230	198690	149950	87840	367620	258610	170230	66088	88743	176720	338420	210030	322540	380730	311410	270370	317900	187220	237430	365300	299440	113310	184100	146390	94608	157420	56887	69939	11089	85598	137230	86312	139960	92390	48886	106750	91130	43019	30760	129670	80080	163930	84908
338630	693870	417280	741730	471490	275380	370390	153610	206400	0	0	130290	0	0	243610	0	111970	242760	480490	782310	838420	370750	640720	802580	261620	0	323250	255020	376320	0	772530	540440	498480	0	419270	0	190100	195690	241950	0	240740	0	315190	0	285520	0	0	136000	0	284620
996510	1045300	1150400	917310	777400	937930	797410	629690	672280	714520	734310	753550	899470	874040	918010	894620	809870	867220	722420	577000	633040	695610	654310	590500	890050	786460	881000	1017500	911120	891810	500190	478260	616150	699610	809120	871730	1537100	1461600	1264500	1002000	1061200	939580	978540	906870	1124300	842920	826440	1179400	630880	538800
51442000	57687000	56278000	52016000	50760000	53794000	47408000	45533000	49069000	58718000	60693000	60819000	57421000	55971000	58334000	64062000	65768000	66520000	48863000	50588000	47898000	47881000	47247000	45235000	54526000	52513000	54816000	56214000	58212000	58045000	34255000	33082000	35773000	36651000	37387000	39004000	40989000	43167000	41390000	48480000	47465000	47067000	35731000	35037000	37180000	37026000	35443000	36446000	43446000	44088000
409270	396100	443690	269320	314290	388570	360150	335870	355710	570260	571720	499700	439180	377680	351850	495130	426620	508300	327990	396500	410220	418890	398440	454880	396550	427550	447090	524730	181720	485590	326280	303290	310860	336480	306490	347170	323460	286860	291420	422140	365960	364900	345930	328210	299740	353210	70819	363080	408920	409600
2646000	2748000	2707200	2922200	2569100	2685800	3709100	3608500	3814100	4982400	4828300	4932400	3326800	3331700	3331200	3402100	3565000	3082200	3010700	2777100	2745500	2756100	2829600	3330900	2868200	2687900	2417500	3150900	3150700	3243200	2706400	2683400	2648900	2659500	2781100	2901000	2237600	2291500	2283200	2290700	2719900	2529900	3284900	2879000	3220300	3459100	3309900	3362500	2911500	3045400
48739000	53154000	52637000	54392000	54541000	53866000	55296000	55988000	55734000	56160000	59279000	60260000	58812000	55512000	57399000	60385000	57308000	63127000	62644000	58431000	62364000	55148000	56319000	60531000	56181000	55842000	58330000	59264000	56559000	58544000	62802000	62586000	59313000	60240000	62458000	64977000	57214000	57129000	59865000	57523000	55519000	55995000	67115000	62496000	67203000	66381000	62969000	63929000	60601000	57347000
82821	0	104150	75586	182000	79501	97340	44216	87445	108100	70090	96730	147900	137810	47149	0	72847	180340	91703	106890	56085	34559	49740	41989	97161	95986	97802	73150	293540	58887	49520	73310	28568	33644	90992	63340	107350	31862	127380	141010	127090	0	69277	81018	0	87906	155000	158110	68269	0
1274900	1300900	1649000	1544500	1565800	1473800	1608300	1321200	1573200	1130300	1137400	1561100	1380000	1220200	1627700	1698300	1509200	1748000	2227000	1843300	2155600	1772600	1727900	1497900	1422800	864820	1256700	1333400	1555300	1592100	1624900	1518200	1467300	1905400	2179400	934490	1269800	1649500	1673300	1628700	1701300	1190500	1595100	1758300	1140200	1411400	1720300	1699400	1704900	1670700
288700	233510	351660	341290	414430	246130	415100	234310	243100	298710	184840	295150	361580	297410	375900	335340	342180	385570	195340	274390	289580	171070	273310	422890	315670	406810	400240	386510	246720	319360	392510	306220	240410	344690	357750	412720	505060	433880	429200	381810	476920	493460	496900	430470	337880	346840	327900	365000	376910	200220
34093	20524	118320	96170	58984	119760	89132	168650	27422	159680	118180	206030	34386	30710	57733	159800	173010	90731	48281	56166	30642	29732	40845	86104	25031	71481	21513	58709	42344	61059	14660	30235	27512	66544	0	28382	30371	19877	54710	61610	61985	86098	16915	0	32644	0	25018	26294	59622	60960
4901500	5264000	5683900	5664500	5482300	5664200	5761800	6097100	5840000	5706000	5665100	6101800	5809700	5085900	5544900	6207700	6065300	6275400	6126300	5701400	6022100	5971400	5857200	5658500	5982400	5939500	6053900	5939700	5836800	5491000	5702100	5722000	5778100	5879000	5816200	5181700	5502400	5872500	5881500	5898100	5938200	5485100	6214400	6159300	6186200	5555600	6692700	6341500	5426500	5563400
478200	419630	365680	265450	385300	327430	308720	374240	320690	339610	404470	313590	389820	509430	399900	288110	265010	270590	382010	434650	406560	369610	503050	444140	464460	450670	493060	398970	432620	473150	461500	471920	481250	491090	612900	575290	299670	428150	409460	256320	157160	504080	451840	436900	542500	465250	434390	484770	237980	405330
90727	0	77940	65185	0	21173	0	0	18840	0	73283	38314	51849	0	0	81299	0	28436	9569.1	12153	57961	0	46328	37951	48724	68732	0	38575	47749	0	41465	0	62465	67259	68301	31629	46611	18501	132070	51593	0	86236	67447	101520	0	0	0	0	21547	0
2639900	2997800	3221800	3404400	2577500	2877800	2560000	2689500	2963800	2522900	2710900	3506600	2820000	2950800	2887900	3639100	3572600	3016900	3565100	2925200	3254800	2621100	2973800	3571100	2416400	3353000	2985600	3428400	3209700	3521700	2426600	3111900	2336400	2128800	3003400	2629900	2955000	3174600	2703400	3042400	3253000	2943400	2493700	2812500	2620400	3217400	2985500	2216600	2926300	2593400
2481400	2881400	2977600	2896500	2419800	2813100	3647800	3438400	3874400	3763600	3794800	3832600	3151500	2911100	2998000	3668200	3645500	3783100	3124100	3518500	3568300	3255400	3229100	3369000	3793200	3719600	4166500	2980500	3023300	3106800	3119700	2860200	3173800	3115400	3292100	3141200	2983200	2957200	3109900	3516300	3516000	3510000	4287300	4277300	4424500	3619700	3985900	3550300	3069400	2872500
80604000	89245000	91257000	90048000	87696000	86152000	86998000	89891000	84819000	93547000	91575000	93707000	100890000	99303000	94050000	98770000	98675000	104920000	82083000	90605000	73578000	84340000	94157000	92278000	98722000	97160000	100030000	94102000	93914000	97037000	101440000	94324000	96509000	97327000	96948000	95237000	96884000	96968000	98378000	98457000	98564000	95472000	112280000	109040000	112090000	100640000	91865000	94913000	92241000	89488000
1209100	1401300	1411700	1314800	1143300	1253300	1427400	1438400	1435900	1365400	1549000	1392200	1744100	1596200	1737000	1317100	1420300	1293200	1482300	1355900	1479100	1387000	1289100	1231500	1647100	1444600	1692300	1476700	1287700	1349500	1587300	1539100	1662000	1450000	1297900	1479700	1667600	1574900	1695000	1553400	1404900	1392700	1482700	1466000	1692000	1414800	1415900	1481100	1717600	1298600
26313000	27430000	26653000	24629000	23854000	24605000	20247000	20020000	19893000	21481000	20186000	20471000	26164000	24782000	25025000	24027000	24870000	25730000	24022000	23103000	23187000	22913000	22222000	24247000	25255000	23305000	23852000	25412000	24533000	25319000	27978000	24755000	26239000	27734000	27425000	31808000	21871000	21655000	21706000	21133000	21747000	20388000	25934000	25203000	25558000	22971000	21786000	22566000	22344000	22696000
36990000	40335000	38755000	36650000	34090000	36816000	30351000	27675000	29567000	32781000	32127000	30259000	40256000	38285000	39330000	37100000	36862000	36689000	31417000	31444000	35554000	33360000	33688000	32605000	39198000	38968000	41331000	41735000	38561000	41707000	43173000	41240000	41235000	41045000	41159000	37820000	35876000	34869000	37695000	33815000	31334000	31699000	39770000	35398000	37803000	32539000	30721000	33597000	33596000	33932000
500460	562640	733640	739820	545770	537180	591140	751350	265100	424260	735160	807870	726060	717810	852850	637060	493560	639590	664260	667370	846790	764200	505540	796060	657040	241660	765380	770420	585470	629640	649530	537750	485440	572230	592170	610510	875540	576240	862420	640230	578770	725930	257920	831750	635740	780440	541500	545690	514730	713470
5937800	7062300	6325500	7729900	6569500	6922000	6322300	6358200	6495300	6385600	5815600	5877800	5875500	5854200	6350200	6790900	6263100	6198800	7176600	7281400	6873400	7148400	6295900	6304100	6533800	6029900	6388700	6588500	6723900	7482900	6364800	6411100	7184800	8456900	6433000	7005700	6818600	6605700	6497800	6113500	6734500	6265900	6194400	6207400	6704600	6978400	5929600	6680800	6301800	6224000
83885	0	122190	117830	114180	114300	66744	274360	133240	159300	172820	36031	0	113540	0	193360	75377	110710	51002	216960	235750	41002	58314	173150	60698	0	136090	92310	86299	22449	97985	36478	70541	0	72132	98380	72042	222040	88115	59824	20509	79718	123370	133880	34090	205890	35464	68865	86571	79045
0	0	0	0	0	0	0	0	0	0	0	0	0	0	0	0	0	0	0	0	0	0	0	0	0	0	0	0	0	0	0	0	0	0	0	0	0	0	0	0	0	0	0	0	0	0	0	0	74908	0
414120	427890	509560	492760	464320	487910	424860	326700	454910	491330	508520	394270	357860	385530	375570	500660	482720	526210	466080	558920	490830	441470	391410	524110	316110	361740	202810	442120	429870	442440	371170	453710	307800	405290	322640	481360	380140	461380	352230	269510	376000	430240	415830	343250	388300	507720	453300	479120	477620	366810
2811500	3096800	2842600	2987900	3173800	3245100	3419600	3036000	3242600	3281900	3064400	3012900	3327700	3524900	3174900	4397400	3540100	3831400	3121600	2871300	2887500	3027700	3029100	3440500	3371500	2873100	3012900	3237600	3150600	2913900	3356100	3102700	3279500	3085600	3368300	2999500	3395400	3204500	3292400	3362300	3227000	2973000	3689600	3476600	3665600	3534200	3579900	3117200	3256200	3419300
2259700	4949400	3077100	6694600	5901300	0	5114600	6004100	10039000	4718400	8362400	6250400	6644600	6083400	6986100	5234400	0	0	14508000	0	0	4688100	3370900	2950600	0	0	0	0	6096800	3886200	2499800	6069500	5518600	0	3101500	4519400	848730	4303100	4971700	6263000	3114400	3176600	4247400	3280200	6037800	8482900	2629800	0	2689600	0
4028700	4450500	4598000	4476300	4141500	4655100	4894200	4713100	4774400	4786200	4752400	5178500	4283500	5020400	5078100	5650300	5325400	5236600	4785300	4472000	4604800	4638100	4697100	5012700	4985200	5156300	5332100	4884100	5138800	4531700	5119700	4830700	5069900	4751800	4366200	4856200	4902500	4371000	4757600	4766100	4741400	4756100	5604400	5362300	5637400	4857400	4463100	5037200	4600400	4500700
68768000	76992000	74197000	77789000	75660000	76500000	74017000	75004000	75211000	73148000	72429000	76890000	79651000	78083000	80719000	79733000	81861000	82667000	79503000	81455000	80595000	76351000	74753000	80414000	82178000	79476000	82006000	77806000	79544000	81257000	80491000	77708000	80474000	77595000	77680000	82731000	80655000	79152000	82573000	78405000	78426000	77478000	84452000	77592000	81782000	77839000	74372000	77147000	73204000	75649000
448440	985200	999810	759830	812570	1213700	687740	476570	1068000	788230	1008500	1167100	592840	353990	291630	1026200	758910	810400	980580	1120200	848120	632740	1370600	477380	769400	395490	680260	836990	938460	633710	932540	426540	807680	719550	636530	1072700	432660	214220	248380	876960	894880	969590	747290	324970	791560	519240	806410	1365800	229110	101990
2085900	2340400	2453300	2464200	2528000	2820000	2990400	3034100	2963300	2861700	2845100	2870200	2437700	2527800	2730800	2086300	1747100	2132400	2234300	2418000	2364400	2486300	2805300	2453400	2381700	2232900	2351800	2236800	2129000	2318900	2532600	2341200	2546300	2427900	2426000	2737800	2325600	2499100	2411600	2298300	2226300	2245400	2380400	2123900	2422100	2233100	1926200	2168000	2324100	2440500
6076300	6181000	5187600	6353300	6698300	6493900	7072800	7124200	6749700	7249200	7730000	7189700	7347500	6857500	7631900	5317400	5438200	6005300	4733000	6173500	6196400	6514700	6346900	6988100	6664600	6785100	6868100	5576200	6031600	6533600	6138300	6435100	6642900	7158900	6877000	7310300	6420900	6886000	6909400	5176300	6537700	6221600	6981500	7414900	7347400	6516600	6569700	6108800	5786700	5941100
0	0	0	0	0	0	0	0	0	0	0	0	0	0	0	0	0	0	0	0	0	0	0	0	0	0	0	0	0	0	0	0	0	0	0	0	0	0	0	0	0	0	0	0	0	0	0	0	0	0
29574	45099	67472	67426	57277	33911	51125	29117	45553	82463	28947	80909	64102	18398	24771	55142	39535	63559	38618	208070	120210	60740	152780	69873	0	0	65729	78649	60100	34779	70194	64537	0	72245	61193	53048	43418	44885	56736	90570	88335	82470	92958	123390	98080	0	46673	90529	0	53261
23818	141940	770740	756710	330440	160550	137420	126420	499030	340530	355520	143570	164950	758410	679860	125270	413650	240080	460050	113900	523730	667530	108520	163340	173450	168930	778880	221610	15983	200260	155170	179320	793960	186350	695090	198800	105070	737210	780890	166380	651720	203260	752680	132360	348200	671730	458890	355580	129220	156710
889570	953000	1458300	971070	852380	1158800	897700	1022100	1296000	1040900	1098800	1055900	1050400	1105000	939910	812870	1086000	1081700	849570	953640	873840	955550	1103900	973510	952150	888490	1305600	922150	1208600	1428800	1028500	1159500	1332500	845100	896680	751300	802090	1327800	870100	899170	856230	797920	47957	991780	1422000	0	1337200	1314300	885840	985900
423760	546630	468820	459850	461030	572490	555470	601630	415680	505940	548450	499400	678140	596110	550020	433550	551310	578570	496160	558830	678590	298070	468240	508830	661360	549440	626720	512650	572680	456090	672890	595780	587850	558200	395500	515600	688500	633820	484960	591420	565760	486810	454690	520130	620190	635250	520660	631550	486690	565590
31320	66212	0	50393	0	14768	75792	64312	82868	83435	110480	70122	37611	71421	83838	130190	78498	86377	0	53048	29196	78064	0	59176	51497	80199	63939	120950	0	65047	119560	0	61871	92969	26875	60021	0	23793	74649	0	0	43658	43777	76236	72556	72073	51912	65397	0	40226
735720	761660	907750	625150	618710	762720	940690	743580	913840	848240	845600	806680	802200	832660	734840	657980	527330	698120	821080	641530	905330	844560	678350	1001600	774000	755980	845570	650460	709730	766330	772180	822180	910950	811730	591780	401030	679590	854130	910000	727780	861360	1027700	789590	721200	709650	852410	707540	700600	707830	668360
317220	405650	367790	339060	364830	342020	256230	297780	324700	335080	209550	301640	357110	321070	417890	377910	339730	418130	427500	419530	436340	377130	365300	404610	397750	375510	377590	333600	332670	353630	349590	278320	285910	338020	416610	373490	220220	345370	361130	225320	330650	344170	308510	372900	414550	340840	356420	327440	348540	276340
0	0	0	0	0	0	0	0	0	0	0	0	0	0	0	0	0	0	0	0	0	0	0	0	0	0	0	0	0	0	0	0	0	0	0	0	0	0	0	0	0	0	0	0	0	0	0	0	0	0
147790	154910	263600	182110	38333	98383	245340	145490	150600	154120	144620	152200	115110	214560	155870	135670	64421	141930	189530	199570	251210	228880	144040	197310	86827	151860	184770	122380	108080	237120	214780	229540	238280	47633	261520	302200	217810	119720	167640	207410	62342	84934	275490	204410	267070	295840	189700	194670	224760	96285
1310800	215880	1324600	1206200	1043900	1084600	281180	0	960480	1518200	1379900	1462000	2251900	2074900	1802000	1591700	1584700	1764800	1061100	689260	807180	81324	0	1074800	279640	1231200	0	994490	1419400	1295200	1329500	859360	0	902480	0	1062800	1480400	2808700	0	1442700	2072800	1608100	1595700	1128000	1473900	3072400	1556200	0	1180600	861570
0	0	0	0	0	0	0	0	0	0	0	0	0	0	0	0	0	0	0	0	0	0	0	0	0	0	0	0	0	0	0	0	0	0	0	0	0	0	0	0	0	0	0	0	0	0	0	0	0	0
55315000	58650000	65339000	62922000	59435000	62147000	62951000	64217000	66204000	64511000	62337000	68049000	75542000	78711000	75389000	89098000	86798000	88239000	68126000	62563000	67647000	64014000	65500000	70841000	71579000	71112000	73151000	58110000	57578000	56620000	66117000	63293000	64752000	49951000	53259000	54096000	64841000	59486000	67482000	61350000	62815000	60491000	68117000	63305000	70617000	62407000	53248000	61270000	60311000	60131000
855910	868990	771060	1024400	957730	948870	906250	820590	933700	920240	706860	811630	841820	913430	993600	1007100	933720	917040	989190	994670	1126900	1009700	956430	1041200	1024800	907600	930880	893530	901950	821240	903050	954930	880360	940530	1190400	1312100	926370	745320	830170	851230	743870	857540	1241400	1073500	1062700	998640	911610	1005800	989810	813780
162090	75163	114150	164640	34883	131660	108230	66911	71081	184760	105290	95384	87963	2533.9	114400	59097	82775	94488	29917	52609	81560	74303	28886	66057	86839	79648	10455	131110	107680	135240	120890	60027	27516	84274	113000	107050	934320	1127400	1117500	139470	168670	146550	53251	50200	110860	148050	148780	22505	69403	15835
29538000	33655000	30930000	33126000	33054000	31826000	30869000	31217000	32188000	30645000	33189000	33043000	33085000	31509000	31394000	30564000	30641000	34263000	33551000	32686000	33047000	30190000	28773000	30083000	30988000	31660000	33509000	35673000	31810000	33020000	31997000	29761000	31931000	30180000	28836000	29670000	35679000	33446000	34090000	33832000	32565000	32983000	32213000	29076000	31223000	31495000	30568000	29777000	30240000	29653000
390080	527450	480520	435720	439010	423820	468820	520190	443840	477220	528460	507230	540350	566410	517120	542780	601750	619290	472630	470030	492140	479770	505340	489120	517260	545250	592740	493110	391090	472830	418740	429780	390440	443880	415000	462590	416600	484590	231810	429250	516880	543800	441160	466690	504610	474550	438760	468130	345300	424830
356690	381260	387590	295860	373470	385870	329320	322000	329610	406530	319850	374950	305840	340760	298520	396800	367340	427180	433640	424670	387170	447960	383750	244830	370900	404770	397110	399070	333740	373330	415900	377680	428250	381260	338970	322460	423250	341480	329700	360940	403470	375210	385190	317560	278650	391020	371700	373560	383300	307990
993770	1066200	1064200	1015100	1022000	1060600	1063400	1239600	1193300	1145600	1311500	1278000	1276400	1381500	1190800	1229100	1222300	1209800	1124700	1126000	1139500	1049700	1042800	1136000	1164100	1098700	1173200	872140	839840	890150	1104500	1035300	1074600	939670	926620	943460	1113700	1134300	1192000	919880	976980	1021700	1193100	1128900	1236500	1013300	989350	1041200	1071300	1006000
6399200	6617300	6725100	7351300	6951900	7001500	7301400	7455600	7519700	7470000	6833400	7090300	8391500	8317600	7815000	7694200	7782000	8136300	8329000	7415200	7604400	7454500	7147600	8403200	8215400	7942000	8463300	7836100	7896100	7952100	8462100	7533700	8099200	6758200	7259400	8187700	8295000	8103500	7166200	8012200	7609600	7318500	8765900	7767800	8660500	8224500	7960900	7227600	7904900	7869700
9324700	10380000	10179000	9751500	9653900	9015000	8938500	8772100	9189300	9543800	9591400	9863700	11045000	10072000	10762000	11773000	10933000	11582000	11225000	10313000	9481100	10648000	10239000	10285000	10811000	10942000	11803000	11129000	10624000	11065000	11382000	10578000	11593000	11182000	10309000	11286000	11252000	10779000	10071000	10986000	10948000	10550000	11444000	10829000	10709000	11212000	10652000	11802000	10736000	10649000
50335	288380	261760	242250	176940	453580	180090	251530	209740	121710	370890	0	229530	0	0	0	179410	289230	394150	1561100	1946900	688370	274300	43200	0	0	226800	554810	256890	0	151410	156120	201510	0	199800	0	241560	0	114680	170790	290510	206550	239610	272100	285060	232310	193970	451540	158940	91128
15310000	17136000	18103000	19524000	16709000	16788000	16228000	15043000	16013000	15843000	16170000	16466000	17389000	17930000	16848000	18247000	18004000	18591000	15106000	13478000	16189000	14839000	14519000	17419000	17787000	18236000	17403000	18589000	18332000	19509000	17060000	16690000	17409000	17037000	17612000	16376000	18673000	18593000	19646000	19895000	19829000	17413000	18003000	17971000	19263000	19409000	18268000	17965000	15685000	17623000
118070	254990	165640	127120	214430	155760	85688	77385	38267	63742	0	173900	116330	99080	133120	217250	125210	0	215200	318550	307120	106840	192560	124430	142360	143480	322930	138820	38737	58171	112370	168870	190500	113630	111040	78835	89217	212430	97883	168420	124350	0	207000	187600	94487	81231	52498	40808	56025	78985
427510	294860	295940	294080	233730	314640	320020	322480	285030	340160	338630	439820	351200	348740	336960	323700	337240	368960	297910	322810	305070	274790	306340	346920	264440	240170	314310	266000	243820	313480	295210	261340	259620	263380	304540	241310	325000	329620	237020	229680	347450	278330	348050	233360	280590	248360	287630	311560	296490	182290
8725400	9560600	9639300	9996900	9740600	9747100	9326900	9751300	9496900	9921100	9598100	10192000	11187000	10521000	10287000	10526000	9702100	10890000	9672100	9257000	10052000	9742600	9119900	10022000	10530000	10394000	10504000	10138000	9903800	10817000	10012000	9777600	10211000	9280700	11186000	10775000	9759400	10708000	10505000	10450000	10229000	10216000	10977000	11045000	11706000	10639000	10474000	11432000	10281000	10119000
21849000	24785000	24018000	22290000	21988000	24925000	26709000	24302000	24557000	24188000	25154000	29209000	28236000	25758000	26944000	28054000	26924000	26383000	26744000	26037000	23155000	24298000	27129000	24696000	26633000	25825000	29257000	24734000	26749000	27692000	23955000	21931000	24854000	24206000	22407000	25643000	22599000	24056000	27560000	24742000	26183000	24156000	25385000	27874000	27552000	24220000	23770000	25682000	23414000	22787000
0	0	0	0	0	0	0	0	0	0	0	0	0	0	0	0	0	0	0	0	0	0	0	0	0	0	0	0	0	0	0	0	0	0	0	0	0	0	0	0	0	0	0	0	0	0	0	0	0	0
35523	169020	0	18264	322230	301340	282810	239110	360080	305990	0	202790	391770	0	115170	45740	0	0	820020	327300	392150	281800	0	44993	81901	0	21480	332610	306600	156540	0	0	332970	0	89889	41994	48837	516540	253380	775730	514410	42509	163270	12277	182710	212970	0	298180	0	485730
327570	417170	106320	239180	154560	119810	494810	0	400720	434700	344840	41869	446210	123840	334790	197330	351450	91036	119440	66028	58445	516670	184010	317360	584740	268110	141470	420520	0	232300	349850	348470	165280	392220	245510	389260	0	223190	0	451370	195800	468240	389500	336240	289330	225020	76685	273870	257000	130320
382590	354660	335510	370530	391760	378550	394630	412560	415140	402990	334900	359770	200060	219510	327990	342310	316630	391190	380540	367010	343930	354490	391970	288430	289030	340830	431690	351900	273820	347380	305080	345940	403340	217210	267140	368400	206160	337260	341650	305630	305460	274540	378130	345540	330790	358150	300460	206300	401810	371030
216000	76267	226360	88733	180950	128430	216640	220300	258510	161400	503620	427230	114230	107880	184210	157350	133980	130510	93504	34210	109770	119690	76910	62034	129440	189620	161920	173600	115360	220470	74669	31485	70428	116900	151630	178080	107310	59143	87559	77712	108650	159190	97355	174460	60661	164680	99724	119190	105120	139680
462620	478230	314780	485060	370530	437640	743930	730520	706950	1020000	771180	747750	431980	672480	659220	866810	791600	639440	383400	412510	528080	472610	482270	556090	496380	504320	518220	440300	480650	426990	539240	555440	527700	465820	563550	517520	349370	390720	489400	453130	585180	585520	565210	568980	528090	521300	434880	472020	456260	571650
98282	230020	229870	587390	440560	673800	540640	501670	659710	50583	507710	826170	718030	1169000	858870	1615300	871720	981940	1061200	1466100	549730	1917100	1677200	1191300	747270	632170	964950	675070	438290	398360	730560	741620	941440	724490	489860	920610	931270	1848900	771740	1286400	1528000	1097500	1084500	1475100	1644400	1354400	558670	414010	814110	1565900
0	0	0	0	0	0	0	0	0	0	0	0	0	0	0	0	0	0	0	0	0	0	0	0	0	0	0	0	0	0	0	0	0	0	0	0	0	0	0	0	0	0	0	0	0	0	0	0	0	0
19592000	22242000	23418000	22092000	22512000	22281000	24427000	23186000	22769000	23207000	24583000	24708000	23696000	23037000	23265000	26749000	25152000	25638000	27258000	25426000	26597000	24760000	24558000	24450000	24976000	24957000	25382000	24000000	23772000	25196000	26133000	25278000	26713000	24492000	25383000	26761000	25045000	24393000	26827000	24506000	25001000	22846000	28422000	25704000	28100000	26546000	26499000	26240000	25519000	24590000
258340	281750	259720	320000	310580	334850	272330	308240	302280	294170	297330	215160	301550	310220	310170	334620	368400	186480	203040	175290	278160	304520	283730	307330	288890	275470	289620	358520	329060	317830	135050	298660	277040	282660	277960	326950	326780	275330	285370	302880	289990	341580	309960	295920	247440	310190	255630	264810	336620	312790
2553300	3263100	3121400	3206200	3146500	3008700	3089400	3105500	2832400	3176900	3052800	3162600	3233700	3106500	3089800	3204700	3204800	3310100	3146600	2951100	3105700	2962000	3298200	3371800	3404200	3296200	3352600	3061200	3111500	3188000	3219000	3182600	3192000	3102800	3201200	3662300	3088000	2990300	3380900	3604500	3451900	3350800	3116500	3090800	2939300	3145100	3111200	3298400	3256200	3253500
161690	0	140630	0	249050	310000	0	1472800	0	0	0	134680	362800	207350	148410	0	193880	739380	376570	311720	0	320660	119420	136040	0	0	0	0	0	0	0	0	0	621790	0	0	0	247150	0	290110	0	148410	0	0	37955	0	0	0	0	0
0	0	0	0	118270	0	0	0	0	0	0	0	0	0	0	0	0	0	0	0	0	0	0	0	0	0	0	0	0	0	0	0	0	0	0	0	0	0	0	0	0	0	0	0	0	0	0	0	0	0
23752000	26181000	27623000	29940000	31099000	24111000	32456000	32523000	31700000	28317000	32381000	29899000	35745000	34312000	36506000	25589000	25041000	27093000	30526000	25084000	27380000	30744000	29216000	28580000	33577000	32988000	33700000	27531000	27437000	31434000	39349000	35809000	42967000	39117000	42504000	46300000	31694000	36856000	30558000	30917000	32191000	32122000	44784000	45398000	50838000	39512000	40018000	40297000	36852000	36312000
63357	157640	154280	107870	164940	166780	153470	120700	162860	108400	150440	71245	31270	172810	72922	139950	139490	71397	128490	161410	177470	187700	158270	152680	115100	131620	107670	135870	139160	121220	108320	113340	122350	55776	103630	118690	114790	114310	118150	140910	133500	76863	94744	123170	142600	120990	98021	110360	133590	122860
36313	24548	0	67465	38413	104240	64322	29548	62500	44032	68446	56211	0	50193	78019	106200	67931	56479	0	0	0	30814	17437	34398	18396	0	0	18149	64876	20454	0	39323	0	0	0	58101	44556	0	40359	13091	20976	0	0	0	13543	0	0	33377	0	23939
3621200	4272500	4348200	3068000	3106300	3043400	3426700	3576100	3273200	3298300	3329800	3251400	4704900	4666100	4911300	3322000	3298600	3566500	3423900	3529700	3493100	3414400	3774000	3267900	4334800	4260800	4338400	3513500	3786500	3875700	3525000	3589600	3664600	3119100	2980600	3190600	3375900	3352100	3476300	3042900	3125100	3082400	3635000	3809400	3696800	3411500	3346300	3380700	3455200	3258300
0	0	0	0	0	0	0	0	0	0	0	0	0	0	0	0	0	0	0	0	0	0	0	0	0	0	0	0	0	0	0	0	0	0	0	0	0	0	0	0	0	0	0	0	0	0	0	0	0	0
6724400	7489100	6650200	7575900	7013300	6592300	7195200	7338800	7447900	6840100	6991300	7352300	7158400	6622600	6755400	7256600	6756300	7494100	7509600	6766500	5842300	6964000	6463900	6585900	7486200	5852800	7166100	7393800	7656400	7417700	7854800	6919400	7455100	7932000	7642600	7777800	7157800	7481200	7817000	8508700	7267300	7750200	7857500	7199700	5608200	7710900	7709700	7662300	7056200	7223900
1456800	1807000	1823000	2009400	1868600	1908500	1841100	1822000	1912300	1922500	1855400	2003000	2016100	1823000	1954700	2132600	2225700	2214500	1970800	2194900	2810800	2258000	2251900	2287600	1875400	2078600	2061400	1851000	1783400	1809400	2060000	2064300	2146800	1526000	1792000	1793700	2033000	1902100	2215400	1977200	1909200	1863400	1826200	1377400	1411500	1737200	1743000	1949700	1748400	2253200
0	0	0	0	0	0	0	0	0	0	0	0	0	0	0	0	0	0	0	0	0	0	0	0	0	0	0	8072.3	0	0	0	0	0	0	0	0	0	0	0	0	48907	0	0	0	0	0	0	0	0	0
2072700	2189200	1999500	2329800	2286700	2415100	2223000	2137700	2310200	2571300	2553600	2093400	2460200	2301800	2268000	2415000	2501900	2507000	2046300	2582200	2485900	2486800	2597300	2523500	2345400	2252900	2510000	2453100	2358400	2588000	2326600	2289200	2356500	2439000	2334300	2401900	2344000	2541400	2370100	2660200	2795800	2604400	2447200	2281500	2449000	2390800	2242000	2401200	2159500	2330400
5849100	6420100	6546500	6328300	7062100	6859200	6783000	6754000	7023600	6884000	6969200	7393000	7287700	7129800	6806000	7130100	6769600	7270100	7328200	6886100	7308700	6974400	6641700	7280800	7205700	6940200	7549900	6538800	6707800	6901500	7303200	7315300	7168800	6558000	6813300	7035700	7158600	7461600	7677000	7176500	7186700	7085800	7363800	6835000	7409000	7034000	6670600	6960500	6749400	6772900
0	0	0	0	0	0	0	0	0	0	0	0	0	0	0	0	0	0	0	0	0	0	0	0	0	0	0	0	0	0	0	0	0	0	0	0	0	0	0	0	0	0	0	0	0	0	0	0	0	0
1237300	1370600	1423700	1280600	1226400	1175200	1367700	1194100	1215000	1585600	1577000	1349700	1540700	1447100	1310300	1623700	1368400	1611400	1262800	1146300	1131700	1301300	1193000	1333400	1359400	1202400	1230300	1151600	1116600	1182700	1078800	1133700	1195400	957110	866610	893820	1333800	1196500	1112900	1202800	1151600	1190100	1027200	932920	947620	1140700	915220	934880	1197900	1254700
3428700	3897500	3805200	3343400	3119300	2929000	4370200	4783000	4912900	3412500	3817600	3381100	4180100	3197800	3590300	2376100	3383400	3752400	3823900	3701000	4647400	2958900	3116400	4305100	4672100	4219000	4628600	2652700	2683100	2971700	4383800	4082400	3868000	3300500	2210400	4433700	4354600	3609900	3479000	3947200	3797300	3144200	6017900	5838000	5362100	4302500	3164700	3246000	4356100	4164500
1291600	1600700	1633200	1261400	1518900	1341200	1611900	1429800	1620600	1174600	1540500	1256600	1633000	1568300	1605000	1087200	1400400	1489700	1653500	1475300	1503700	1531400	1129400	1856200	1568300	1661000	1573200	878500	1288900	1468900	1735200	1558100	1449800	1710000	1420000	1888900	1525300	1704900	1484000	1657000	1772700	1540900	1738800	1641000	1981500	1504700	1329700	1544800	1746400	1226100
1019400	987660	1036900	1052100	921140	1014600	982140	996030	1112400	1116700	1036900	1035900	1092400	974930	1031500	956080	1122800	914510	897230	885330	1002400	842670	975380	1018400	1008100	990250	960340	1145400	1060400	1175700	1129000	1083300	1065200	936270	1066200	942310	1087100	910980	901250	986200	1208700	996320	1064000	996320	1063600	1071100	1149400	1185000	1292900	1217300
28116000	30017000	30979000	31942000	29311000	31639000	29029000	28644000	29055000	29906000	30454000	30675000	30765000	29419000	31254000	30923000	29586000	29985000	31738000	32229000	32161000	30562000	28532000	30875000	31470000	30928000	32223000	32246000	31457000	31499000	31487000	31040000	31825000	31020000	30660000	32367000	32714000	32178000	31647000	29943000	31037000	30415000	33608000	31193000	33404000	30812000	31197000	31160000	29512000	29979000
212530	203520	238360	263050	250260	254200	274050	288240	287950	322610	296280	267390	191500	214810	213500	444570	365620	159400	229500	252230	289300	278530	297210	292200	300370	235270	282080	295390	256870	253880	258470	235380	200180	237100	249800	254140	279440	211380	287540	298740	317420	318570	301840	269350	262470	280840	269800	93369	289510	250410
2365900	2741300	2666100	2596800	2750600	2918700	2902000	2805000	2949600	2899300	2706700	3484600	2880900	2946300	2963400	3153700	3055900	3635900	2974500	2978100	3140300	2837100	2965400	3037900	2781300	3063200	3138700	2808200	2828800	2932300	2886000	2521400	3162000	2914400	3144000	2875100	2664800	3127200	2834900	2880000	2869300	2766700	3564200	2860400	3217400	3211300	3136800	3170500	2821500	2753200
1513500	1752700	1496500	1585300	1554400	1707500	1533000	1589600	1526800	1660100	1765300	1555900	1744800	1563900	1565500	1808200	1684600	1989800	1786000	1531200	1831600	1566800	1598700	1563700	1706900	1409400	1668300	1610200	1692200	1399200	1464800	1337600	1352400	1195900	1376900	1517000	1477200	1577200	1595400	1679100	1507600	1470200	1357900	801510	1519400	1279000	1247500	1305600	1311800	926060
49943	129830	114350	144400	120060	62744	126470	60995	123810	178540	104830	168360	41749	107980	80784	188210	239840	119300	76379	49704	80397	138450	33060	119700	172930	85302	37323	178290	144860	173760	97032	307560	68192	49389	102110	143060	168040	102410	152660	149820	107620	125130	97473	62561	84951	139840	117170	104840	170240	141680
0	0	0	0	0	0	0	0	0	0	0	0	0	0	0	0	0	0	0	216480	0	0	0	0	0	0	0	0	0	0	0	0	0	0	0	0	0	0	0	0	0	0	0	0	0	0	0	0	0	0
0	0	0	0	0	0	0	0	0	0	0	0	0	0	0	0	0	0	0	0	0	0	0	0	0	0	0	0	0	0	0	0	0	0	0	0	0	0	0	0	0	0	4286.8	0	0	0	0	0	0	0
31145000	35598000	34585000	38299000	37769000	34317000	35442000	35154000	35724000	35519000	34854000	34504000	34801000	32491000	34587000	40746000	38990000	41655000	36018000	35398000	33729000	35542000	36119000	36102000	36720000	32920000	35100000	41005000	39582000	40418000	34238000	34557000	34546000	34631000	36899000	37124000	37649000	37055000	37612000	37116000	38819000	37188000	35050000	33191000	34954000	38444000	36604000	36225000	35023000	35991000
362120	401770	437230	376840	319810	366610	412060	431980	398570	534430	615390	564460	458580	452140	443870	559830	490250	513870	341180	376060	359490	327920	320080	412180	276330	289290	282610	289360	263390	316970	191540	203760	171530	198170	183580	187180	225550	214700	194390	284440	313610	326360	152170	195220	177940	204780	216250	207660	295770	264550
2901300	3492900	2982900	3071200	3067200	3058800	3256800	3509600	3238800	3212900	3325600	3244700	3787100	3580000	3427700	3204700	3244700	3330900	3278500	3385300	4063500	3359600	3192900	3037600	3184200	3248900	3372700	3321500	3414900	3175200	3599200	3287900	3736700	3410800	3618300	3633000	3408900	3387700	3027900	3210900	2761200	3006800	3690300	3257700	3638900	3621300	3183900	2928800	3209300	3254700
0	0	0	0	0	0	0	0	0	0	0	0	0	0	0	0	0	0	0	0	0	0	0	0	0	0	0	0	0	0	0	0	0	0	0	0	0	0	0	0	0	0	0	0	10820	0	0	0	0	0
68540000	72839000	79417000	77835000	71137000	77382000	74951000	67855000	74120000	74179000	73477000	77734000	83720000	84466000	82540000	85966000	85002000	82039000	79891000	77907000	80440000	77640000	74635000	86402000	80837000	85621000	82962000	79361000	79431000	81923000	80366000	80813000	81506000	78803000	84296000	78110000	82410000	79328000	84857000	81116000	78090000	75415000	94032000	83440000	96448000	78788000	80769000	78012000	72527000	78908000
679230	515860	200590	61818	167730	306610	887730	655190	467620	203950	725250	0	537360	352360	636600	502560	688930	138050	562540	268600	403500	483590	733410	308970	774470	604310	1207400	753860	644670	334690	244430	124050	225360	207320	417890	790910	701650	616670	274150	466730	575110	1015000	678610	141120	147860	1086100	785660	391490	1057200	781350
1536600	2014700	1658300	1547000	1366300	1497300	1625200	1511600	1600400	1404700	1504000	864370	1801700	1730600	1930800	1891300	1811400	2155800	1773000	1927700	1750100	2085600	1968600	1291600	2071200	2108700	1710900	1693700	1727100	1111700	1834000	1581200	1694000	1534000	1487600	1699600	2003500	1557200	2057100	2018100	1655200	1506400	1587400	1819500	1353000	1711400	1997800	1884800	1500700	1884600
2028200	2344400	2192700	2279000	2312100	2289400	2374600	2246300	2507800	2501600	2418700	2699100	3028800	2507200	2642400	2781600	2845800	2909400	2194000	2524400	2411400	2400300	2157400	2438600	2803900	2750100	2960000	2616400	2613600	2741200	2421800	2480700	2517700	2174900	2432700	2312800	2647400	2762500	2833100	2732700	2655100	2535900	2738100	2760800	2863800	2740600	2728000	2694700	2398600	2533100
3342900	3673200	3396000	3668400	3681600	3641600	3783000	3687700	3842600	3897600	4051400	3380900	4074900	3749800	4110800	4514100	4146000	4531600	3760800	3951400	4074000	4055300	3862200	4173700	4276100	4103400	4392000	3943100	3856400	4113400	3718000	3635700	3607800	3493700	3237100	3926700	4151800	4228500	4372000	3965100	3857900	4149200	3612200	3789800	3904400	3658100	3689100	3770100	3586500	3441800
38403000	50258000	54136000	48957000	51626000	47960000	53854000	43235000	47170000	42484000	49868000	53003000	64300000	58377000	61104000	44443000	55742000	58492000	43367000	45712000	48509000	52786000	45974000	54661000	59349000	58045000	55781000	55913000	54338000	57548000	62667000	58829000	62961000	59076000	65457000	61031000	54000000	55761000	58964000	53248000	55193000	55072000	70210000	56520000	69227000	55597000	59723000	61259000	58911000	52441000
4827500	5324800	5553800	5807900	5435500	5427800	5829700	5662000	5651700	5300900	5180600	6276500	6634700	5989400	5792700	6571800	6384200	6039400	5514700	5848500	5251600	5766300	5344300	6330600	6058500	5784500	6342600	6069100	5567000	5890200	5877400	5710900	6015000	5633800	5602600	5816400	5732800	6178200	6316000	5676700	5747200	5595400	6409900	6244600	6561600	6000100	5571500	5854300	5406700	5958500
6890100	7607200	8176000	7684600	7802500	8071800	8418600	8060200	8130500	8827300	9104900	9731600	8917500	8037400	8500500	10234000	10106000	10187000	8084400	8544300	8621900	8842400	9005700	9298900	9284800	9016700	8677000	8606100	8688800	8312700	9295000	9014100	8693000	6562100	7606800	7474000	7789300	8042200	9061700	8534100	8003500	7766700	8362200	8572200	8435300	7041200	7871300	7884000	8185400	8107000
14581000	14864000	16261000	16379000	15288000	15088000	13752000	13384000	13121000	14532000	14872000	13234000	13840000	14384000	14082000	16189000	14013000	12911000	14194000	14381000	15029000	13960000	14439000	16072000	14703000	15773000	15531000	15532000	16209000	14124000	12277000	12683000	13073000	13011000	12020000	14190000	13855000	15384000	16221000	15491000	13815000	14015000	13109000	13601000	15786000	14618000	13361000	11769000	12429000	12910000
352690	308540	435930	234240	437190	395620	322950	345590	377940	343080	454690	320600	191690	329470	280650	472910	293960	361970	372760	549620	299020	438690	374560	263960	450510	287340	324740	464920	418660	512900	334010	481920	312130	270020	263220	498730	235650	346540	412780	451150	514590	269220	321360	337140	326570	194270	522530	263600	258430	422900
84254	82796	93946	86063	70330	71994	92202	70835	97952	116760	82868	116900	80006	92973	97200	96957	106260	111510	78554	61638	53997	82127	35072	99040	101190	81279	93038	55179	87839	95961	69752	82057	96355	81584	88771	68006	59933	28969	60201	82123	94779	85780	100060	85486	98328	100970	103410	88859	90477	96632
1766500	1853400	1889700	1973400	1925400	1953000	1860900	2139000	1981500	1945900	1848000	2009900	2139800	2083700	2060300	2320200	2119600	2178300	1855400	1853200	1993600	1792900	1859700	1929700	2156900	2082100	2063400	2039800	1998700	2193300	2096200	1939200	2139300	2012200	1921900	2023900	1954500	2252500	2241400	2092500	2034300	2107700	2268900	2221200	2367900	2314700	1996900	2374200	1937000	1891400
1962700	1930300	2068800	2112400	1971400	2028300	2190800	2174000	2288000	2299700	2084200	2151400	2382100	2298300	2322900	2413500	2352300	2402600	2383600	2265500	2464700	2368700	2170500	2334300	2460500	2373300	2498000	2385400	2330900	2421200	2013300	2083500	2022100	2147000	2193500	2189800	2062200	2093000	2346000	2297400	2307100	2175300	1796300	1791800	1915700	1962100	2081200	1641200	1938700	1994200
8349500	9615400	9443600	9053500	8876000	8928500	8545500	8687600	8480800	9000000	8848900	8836700	9676700	8706500	9332400	9369300	8726500	8904400	8476600	7789800	8644000	8565900	8543300	9213200	9077500	9088200	9782300	9435400	9532400	9228400	9020900	9152200	9363700	8503100	8703600	8935600	8704800	8679900	9199500	8532700	8718700	8500600	9662600	8834000	9353900	8888800	8628200	8505200	8485800	8590700
5060400	5628400	5872500	6111400	5525200	5797200	6033700	5401600	5723300	5745100	4775000	5096600	5719100	5394000	5602800	5884700	5395600	4793100	6290700	5300300	6137600	5671700	4971900	5675600	6190500	5892800	5629200	6016000	5896100	6137800	6376400	6265600	5989500	6148600	6697000	6338800	6214100	5948300	6041000	6019600	6083400	5778900	7072200	6123300	6538200	6211600	6054900	6216100	5745800	5713300
40528000	46043000	45550000	44073000	44000000	44324000	47832000	48714000	48799000	47982000	47287000	49255000	46856000	44430000	46724000	51431000	49172000	51046000	47940000	45660000	50750000	48698000	48507000	50415000	49286000	47463000	49760000	48232000	47381000	49207000	47203000	45693000	47283000	42836000	42716000	45233000	47722000	47256000	49273000	45150000	45047000	44699000	50013000	46217000	49900000	43816000	43527000	46629000	45843000	45313000
44997000	50143000	52223000	51579000	51934000	53724000	50893000	53341000	50370000	49532000	49276000	54614000	61501000	55404000	58292000	59234000	54529000	59595000	53932000	55293000	55565000	51494000	52035000	56378000	55855000	56129000	56497000	54859000	54181000	56182000	58668000	56354000	56641000	57755000	53998000	59974000	55175000	53247000	55003000	55173000	53412000	54758000	63258000	62697000	61969000	59918000	56466000	59536000	55090000	50876000
2821600	3231900	3159700	2960800	2941900	3140100	2793300	3231500	3123600	3217800	3134800	3119200	3368700	3453800	3380800	3424700	3389600	3267900	2990000	2831700	3471300	2879100	3141600	3248700	3480900	3299700	3475900	3350700	3148700	3412600	3216400	3028400	3109200	2967800	2937800	3027600	3438600	3086400	3249400	3223300	3212100	3037400	3060100	3018300	3098800	3197700	3033600	3018300	3189500	2946500
77653	26624	45127	71213	36265	88548	18991	132950	46969	71645	46099	67961	64037	92250	76569	113630	42256	24007	50803	141740	61782	104570	21067	104820	44210	13978	46694	61128	62244	41500	21975	40426	42244	24908	23613	0	14144	55072	0	4792.5	91506	38823	58454	41038	102370	65884	48231	70527	0	72747
1650400	1728200	1858800	1819100	1760700	1811000	1699500	1923900	1876400	1844100	1753700	1854300	1916200	1935100	1954900	1914300	1858800	1717300	1799400	2030600	2004700	1821400	1900500	1830400	1832600	1817800	1975000	1683000	1752000	1759500	1735000	1775300	1847400	1653000	1625000	1703200	1953400	1801000	1904600	1797300	1787500	1708300	1862300	1797900	1904800	1790600	1750500	1626700	1705200	1716500
277910	122080	156570	119410	138360	310820	55593	336100	288420	310100	353800	374810	281690	194640	256390	260820	276030	117810	179470	234160	233640	157850	227670	172860	89178	190960	255570	254160	223180	133810	44892	211310	22345	261360	219240	226690	189140	108920	241990	223200	235680	242740	113430	212370	135410	246680	99229	200410	252030	188650
0	0	0	0	0	0	0	0	0	0	0	0	0	0	0	0	0	0	0	0	0	0	0	0	0	0	0	0	0	0	0	0	0	0	0	0	0	0	0	0	0	0	0	0	0	0	0	0	0	0
219880	264350	273300	244950	211750	227930	210440	197530	178850	205010	212400	164820	296120	202990	181080	244000	299860	262900	217450	209150	281690	266240	196190	318320	255710	239950	281910	230610	250450	194930	207610	161680	194360	167540	195880	187250	214260	213010	202480	215100	185330	202260	163020	192190	189530	175650	182860	202020	132040	165890
5764800	6522200	6521800	6062900	5806400	6019500	6254800	6164300	6495000	6770500	6297500	6665700	6800000	6880100	6794000	6714300	6564000	6519300	6412300	6278400	6464600	5924800	6229700	5998700	6388400	6405400	6700900	6230700	6212500	6182400	6055900	6116900	6333300	5532800	5328900	5661000	6145600	6366100	6188900	6134100	5692600	6118200	6472500	5999800	6077300	6043000	5868700	6037600	5854500	6014000
12168000	12943000	14872000	12911000	12374000	12837000	13676000	12536000	13565000	13067000	12217000	14244000	14047000	14726000	12800000	15954000	15970000	15202000	14711000	12399000	13606000	12578000	12406000	14409000	15274000	14354000	14336000	13751000	12474000	14346000	15043000	15252000	15554000	16145000	15978000	14857000	14118000	13575000	12593000	15191000	14695000	13158000	17357000	15343000	14817000	14804000	14764000	15267000	13924000	14175000
35250	66543	64437	63370	78267	17699	69538	27176	60896	51973	38235	28385	58046	51470	55473	45469	4947.2	13796	0	28599	15823	10252	42099	19314	25520	0	35132	0	7509	67740	53917	32037	48769	47803	50588	46281	51528	44194	0	45601	17615	36638	30418	19210	13692	61932	53122	55756	58022	50906
6757400	3257100	5724000	7540900	7578000	8778200	2883800	6075000	4478600	7517100	8333700	3931600	5668400	11777000	9606600	2862900	3841500	2822900	7311200	7647000	5268700	13948000	9656000	15087000	12592000	12366000	11744000	4518600	4130400	5147100	9792900	5474900	6059000	7304900	7543800	7719900	5572000	6665400	7724700	5457000	7717400	6389400	10438000	10311000	10374000	7596900	6792700	5936600	4571000	4210200
0	0	14834	28904	26922	0	0	0	39157	0	22000	39718	0	0	0	0	0	0	38872	24400	54482	45767	0	0	0	14877	19789	35515	22456	35042	0	0	0	22304	0	0	0	0	0	0	0	0	0	0	20087	0	0	0	32626	0
35053	38901	34699	39942	45618	10093	54232	58610	73644	0	25759	52463	40723	5495.8	47581	0	19058	83794	42736	39294	0	21456	20296	0	42435	62071	50766	11737	34312	0	56929	47701	29351	18624	39992	18681	25261	41287	41237	39070	18559	62881	68758	40854	38981	36381	38697	37549	50174	40373
108510	0	39952	68039	0	0	7192.3	0	0	62852	0	0	0	480720	95988	241760	279400	303890	125920	86572	0	0	0	62787	58333	0	0	0	33460	0	146180	0	39077	0	0	0	55889	171220	0	166360	0	0	121790	160260	129850	74102	16174	371310	20215	0
3891200	3723500	4192300	4259200	3926400	3960000	3874900	4229800	4257500	4089800	4001800	4187100	4476200	4244600	4044200	4421200	3949500	4236500	4538800	4381700	4892400	4100900	4553600	4518700	4368400	4519100	4571700	4004500	3890100	4063900	4331000	4228100	4362900	3157600	3787300	3221600	3845200	4389200	4638300	4244500	4395800	4158900	3501300	3524100	4087700	4041200	3804600	4187900	4140700	4485400
29730000	33097000	34818000	31876000	31148000	32896000	32869000	28311000	32478000	32805000	32118000	32841000	37283000	34297000	33989000	34763000	30733000	36450000	35824000	32636000	35074000	30093000	30481000	36261000	35714000	35902000	37097000	38471000	35056000	37808000	37218000	33973000	31158000	37413000	37403000	34010000	34131000	35061000	36126000	34348000	33182000	33912000	38160000	35272000	39749000	38226000	37338000	34694000	33584000	31925000
0	0	0	0	0	0	0	0	0	0	0	0	0	0	0	0	0	0	0	0	0	0	0	0	0	0	0	0	0	0	0	0	0	0	0	0	0	0	0	0	0	0	0	0	0	0	0	0	0	0
149950	34314	162320	149760	213270	198520	191280	178780	256960	216310	209520	313720	199400	206280	171400	240040	238710	198380	201340	248610	153050	127990	255190	243120	274760	222330	256290	272090	286890	223130	299830	198150	190580	197110	78734	211250	259500	126270	158480	292250	167160	233330	213220	169200	159490	179660	151150	181350	237380	212810
111380000	121490000	122400000	124220000	122750000	116970000	106100000	97791000	104330000	109850000	109200000	113830000	122440000	121820000	123920000	123240000	121720000	128960000	124340000	121180000	113200000	111060000	111930000	116500000	121000000	118570000	125510000	127640000	124840000	124210000	133690000	125140000	125490000	133220000	124830000	134060000	117380000	115680000	120560000	117470000	109490000	106490000	129000000	123350000	125270000	116580000	108670000	111910000	112230000	112730000
816200	962390	896330	962970	881900	873930	1033200	957360	977100	1105100	951210	1092000	1066300	1036100	968430	1040800	1030700	1023700	1034900	856210	921780	785570	790050	876170	876120	843940	926560	927540	903710	959240	886060	836360	712970	917870	838770	1021400	994420	925680	919310	924990	977400	880170	1068800	946810	1032400	1069500	918380	1037800	941300	812010
351850	371340	382180	316240	315960	370180	347600	368210	590970	355120	272170	360570	433420	350930	433030	355840	31393	398280	430510	319270	335950	294700	360160	385830	402200	436440	392060	379590	380540	360440	355430	475360	423110	329170	252400	322100	374560	283890	369320	260170	346890	317720	273340	331640	237350	319420	330640	341540	299020	240180
36049	298800	0	51218	0	76076	106360	87976	0	104410	145800	35628	159850	101400	153670	60219	69126	84700	100310	85102	0	78264	97816	81004	20507	133820	18881	65451	137860	34125	82411	80301	154800	14772	108660	34104	0	29863	33002	76306	103750	271420	194030	70237	82622	409470	114570	95206	51900	158310
1512600	1600800	1578200	1897400	1958800	2040000	1550300	1636600	1525400	1645500	1860900	1692200	1637900	1570800	1487200	2070300	1881200	1880500	1758500	1627700	1698500	1510000	1588900	1536300	1511800	1606100	1623100	1897400	1969800	1857900	1782500	1696600	1818300	1698900	1753800	1842000	1837200	1861000	2056600	2029900	1899700	1952500	1751700	1625900	1730900	1940600	1850200	1818800	1795000	1856400
155530000	174480000	167790000	167050000	161410000	164260000	174600000	172250000	170670000	167640000	169280000	171210000	188030000	175210000	180820000	179290000	174460000	178190000	181070000	174000000	180790000	176690000	170060000	178910000	184540000	178440000	186840000	168000000	167080000	171170000	186370000	179730000	189010000	169850000	165470000	171420000	181280000	180300000	188760000	176750000	175590000	170650000	179950000	172700000	181320000	174860000	165990000	173380000	171180000	170900000
92469	143130	96488	43844	96011	89782	91595	86943	143760	90531	77859	59362	40453	192020	104090	160070	76625	172700	135700	38386	100270	87651	65365	124450	0	109260	51589	45718	29799	49332	108800	77198	91784	53065	64703	89302	75369	59205	92467	92500	149110	201150	90497	0	0	0	33066	0	100280	0
119030000	135430000	140720000	132910000	123350000	128440000	128890000	125200000	133050000	117800000	128010000	131810000	146570000	148050000	146670000	139130000	127950000	103470000	153040000	150940000	148190000	138140000	133050000	140930000	149370000	142820000	148100000	160250000	150760000	157350000	163500000	171120000	152200000	196210000	189940000	183480000	159170000	150070000	153630000	143830000	145220000	148510000	192020000	176740000	186130000	181090000	186920000	174560000	173820000	159570000
180370	155030	0	184960	211050	185080	189080	199620	196080	202070	171790	194510	258040	159060	230980	225620	281920	289440	216160	178170	185780	174730	194480	217550	275150	247200	269550	0	0	250360	117060	239350	258700	245010	237970	247290	179420	217230	222570	200410	235500	239500	279060	231700	257400	283420	271070	267420	222540	237010
435260	496670	287770	326790	144320	749640	560300	587890	659300	693470	372930	308900	681210	539390	772080	733030	719850	1018000	386010	588350	350540	613470	471080	471240	738670	501720	516890	536590	728420	656890	580030	571180	640670	1038900	432260	451560	587460	501990	189080	511920	361180	556680	879190	424330	478770	679350	406210	391470	531400	572810
1945200	2372700	2195100	2150000	1841000	2076300	2083600	1656700	1981900	1949100	1957300	1737200	1557800	2386300	2625300	1875200	1578700	1976200	2367400	2056000	2159100	1837000	2277600	1547400	2323000	2596500	2135100	2289300	1465500	2345300	2330200	1793500	2297700	2273600	2218300	1964500	2512000	2263900	2027000	2569100	2382500	2218600	2125600	1699100	1817400	1491200	1888900	1592100	1906700	1434300
80271000	83751000	88526000	95951000	81284000	85895000	84625000	88298000	89448000	88494000	88038000	91769000	86877000	90224000	92246000	78875000	71831000	69483000	85152000	79358000	83136000	89875000	87996000	86228000	88635000	92368000	81886000	100440000	95251000	92616000	95956000	96863000	93020000	147190000	123810000	108580000	95198000	91449000	82727000	92339000	92459000	85531000	142660000	125630000	122210000	126170000	116570000	99077000	105480000	99651000
17961000	20092000	20138000	18901000	19360000	20907000	20820000	21763000	21098000	23455000	22712000	23264000	19512000	19465000	20138000	20341000	18677000	20453000	16637000	16415000	16501000	16444000	19164000	18043000	21288000	21137000	20368000	20130000	19519000	19195000	22887000	22204000	21087000	22626000	22472000	21879000	20485000	21532000	21141000	21241000	19703000	21161000	24654000	23485000	24160000	20961000	20563000	21415000	21190000	20143000
354040	447100	337710	405240	394040	357390	414700	427920	315590	332130	361630	466980	388240	334520	276660	369480	198850	282750	287390	290680	192210	298390	232490	261500	354490	329820	315670	404340	420520	440250	294600	270480	335390	425560	411570	422540	349280	357190	313440	421300	366820	305400	345540	313090	362930	435790	415750	349970	419840	380610
26451000	28990000	28230000	29298000	27967000	27421000	28284000	28180000	27730000	28357000	27727000	28109000	30297000	30108000	29511000	30050000	28711000	30394000	31964000	27904000	30018000	24217000	26753000	28347000	29828000	29380000	29390000	28992000	29153000	29513000	29579000	29331000	31047000	28146000	29716000	32358000	31342000	30499000	31368000	30731000	30744000	28999000	32883000	31843000	34063000	32664000	30488000	31787000	28975000	29134000
10956000	12109000	12866000	12258000	11450000	12482000	11902000	12141000	11661000	11805000	12222000	12072000	12539000	12253000	12585000	10996000	12692000	13416000	13631000	12988000	13728000	11625000	11761000	11228000	13139000	12136000	13258000	12176000	12502000	12431000	12619000	12387000	12714000	12755000	13532000	12867000	13286000	13656000	14280000	13386000	13725000	12538000	14302000	13977000	14469000	14067000	13231000	13500000	12452000	13287000
102200	86573	101460	112130	58574	108500	117430	57027	78686	126090	97887	124150	121280	117540	126300	142950	140350	138820	134030	122050	47178	114940	104310	116200	101120	98125	53968	107540	68934	118420	99664	78861	123220	114860	32582	122700	87444	146360	69498	118270	130340	57894	119420	105400	47276	119660	62325	135380	112400	115950
1082900	1175700	1273300	1224000	1191400	1245100	1064000	1050500	1058800	1151000	1173600	1128900	1195200	1089500	1172000	1185700	1253800	1252300	1150800	1136800	1240900	1263300	1174900	1269500	1272900	1170100	1284600	1219500	1178400	1231700	1112900	1180000	1186400	1205000	1186700	1131000	1180300	1305000	1220100	1321000	1315800	1197600	1286400	1141700	1226500	1243900	1277700	1207800	1089200	1067100
40961000	43723000	42827000	46536000	42309000	44062000	44431000	44380000	43522000	44013000	43362000	42443000	47705000	44417000	46305000	44291000	42090000	43876000	44750000	39224000	42838000	41588000	40884000	38559000	46416000	44092000	44404000	49145000	46901000	48577000	48414000	46128000	46490000	48719000	48670000	53848000	49226000	48665000	48820000	49641000	46869000	45724000	53560000	50116000	51934000	52819000	48764000	52130000	46855000	48305000
19340000	23125000	22558000	22016000	21990000	21458000	25221000	24133000	24439000	22429000	24483000	24382000	25123000	25436000	23780000	30306000	25035000	26611000	22609000	23424000	24525000	23254000	23355000	23499000	25411000	24260000	25136000	24476000	22263000	20492000	24580000	25116000	25961000	28079000	24390000	25772000	24283000	23845000	25281000	26660000	25593000	25360000	31272000	27370000	32082000	28419000	26997000	27302000	23437000	23588000
28500000	30307000	29012000	29603000	29706000	28620000	29631000	30352000	30163000	30849000	29800000	31144000	33186000	31639000	31964000	32051000	29427000	29729000	30541000	30260000	27020000	28537000	29733000	30071000	33092000	29783000	33167000	33500000	32411000	31588000	36046000	29707000	34872000	30862000	33325000	36760000	31437000	30733000	33615000	32785000	33808000	31419000	36067000	36878000	34705000	30517000	34059000	33755000	32451000	32693000
1475700	1575400	1705300	1806100	1720600	1725000	1547100	1776600	1781300	1812400	1599500	1805600	2383400	1998300	2070700	2105200	2048100	2158900	1654500	1418300	1338500	1423500	1501900	1649900	1955500	1994400	2268500	1962000	2095400	2137000	1925600	1750000	1792800	1842900	1946900	1940300	1866400	1775600	1794600	1923200	1952900	1936600	2219800	2112900	2243400	1883800	1994900	1970700	1778800	1843400
1451700	1641400	1632700	1613300	1536300	1516800	1669800	1883200	1906000	1897700	1824100	1853600	1682100	1805400	1726600	1864200	1741000	1851900	1697700	1701500	1785600	1517400	1538900	1559000	1774900	1624200	1780800	1390700	1268600	1544200	1468000	1665600	1503200	1500400	1575100	1486500	2071600	2153800	2260500	1845000	1820800	1880000	1858600	1783800	1731700	1823200	1507100	1736600	1960100	1753300
39012	0	0	0	0	44644	0	44505	0	0	0	56095	44545	0	0	0	36971	35497	0	0	0	0	0	111970	64765	36203	66834	0	0	44575	0	28991	0	0	0	0	50924	0	0	0	0	0	0	0	0	85275	0	0	0	0
1165400	1215700	1196400	1351200	1271400	1172400	1256300	1185200	1267200	1211400	1290100	1239000	1305100	1307900	1271100	1396100	1314100	1238800	1415300	1367200	1359300	1313100	1335000	1397500	1356500	1404900	1350300	1347500	1149800	1290800	1064600	1187100	1160300	947510	1002400	976220	1242500	1298400	1398500	1311500	1339900	1245000	1132800	1140100	1138400	1070500	1104700	1151600	1160000	1165100
2429600	2827800	2892700	2519900	2358100	2557300	2813800	2696000	2665700	2799600	2840800	3138300	3107300	2875800	2766800	2870400	3104200	2708800	2771700	2766700	2656300	2538600	2518000	2722100	3152900	2804300	2961800	2728400	2595500	2640800	2623400	2574900	2791000	2336500	2354000	2658600	2896800	3217200	3346300	3016700	2498600	2751400	3065700	2650900	2630000	2685900	2658200	2637400	2559300	2635300
0	0	0	0	0	0	0	0	0	0	0	0	0	0	0	0	0	0	0	0	0	0	0	0	0	0	0	0	0	0	0	0	0	0	0	0	0	0	0	0	0	0	0	275.17	0	0	0	0	0	0
3569000	4006100	4030100	4198900	4107900	3932000	3937200	4265800	4146800	4194500	4075600	3717200	4530600	4046100	4739100	4466200	4166000	4451600	4272400	4576800	4422200	3854100	4428400	4415100	4138100	3796300	4465000	4328300	4306700	3757100	4320500	4243100	4155800	4037100	3598700	4008200	4295500	4102100	4055100	4559600	3955400	4280300	4622500	4324200	4653600	4286900	4194600	4607300	3772500	3911400
82444	161340	85839	77744	78055	90873	20516	116050	33743	90977	0	55717	84725	105080	109420	56833	47192	99388	77711	52364	0	185610	68518	30358	98896	22063	0	115030	56389	33223	162920	66476	31330	152310	140440	0	20143	86119	37511	91273	146900	67152	110110	102830	106830	38342	37741	0	84888	45417
0	67977	0	0	75928	18633	162220	103080	0	0	89853	35586	0	62395	35089	148080	41963	21194	23906	98446	122970	135780	0	144410	26377	0	0	108740	0	159600	85537	66733	18779	0	0	0	52847	27527	59152	0	15502	0	0	10357	19695	35403	0	0	112100	76093
97019	181340	146340	132260	113360	139330	117600	135840	110020	150140	138910	63415	154610	172380	136670	173870	157070	138360	105230	34678	120560	138810	78334	144990	161130	140420	178000	143360	111870	154420	144350	118060	119520	151460	147410	140750	155340	116760	46843	108010	108170	105080	149690	128800	130380	125320	120470	151350	136660	122820
47097	58906	0	70684	0	56353	0	0	0	60040	0	0	0	0	19290	0	58197	0	50744	0	0	31610	0	50813	0	0	54144	94615	0	0	63025	0	0	0	0	34219	40142	47470	34364	0	57400	0	37358	38971	0	73553	38295	0	25084	0
30659000	33593000	32593000	29357000	29241000	29582000	33720000	32386000	35621000	33509000	35528000	35071000	33983000	32967000	31826000	29220000	25328000	31834000	31894000	32101000	32373000	31607000	31706000	31356000	35371000	31770000	34514000	31373000	30214000	31058000	35922000	34498000	35833000	34687000	34723000	32906000	32345000	33506000	33934000	36601000	34873000	32812000	39424000	38068000	40168000	34633000	35351000	34234000	30754000	29733000
212580	154020	149230	264750	225140	206170	158750	232770	112320	199650	213870	234710	124280	247980	278790	256120	46717	235550	211390	168040	148940	179750	166870	302250	154390	156060	164110	321280	225900	183070	75349	176210	218210	13338	86952	249780	167550	138200	223460	24310	177710	105860	122260	117260	276180	158370	83168	327680	164600	133830
45766000	48151000	49292000	49346000	44960000	45705000	51500000	46955000	50639000	49272000	47899000	54097000	51999000	53315000	52913000	47627000	49189000	49000000	56074000	47894000	51758000	45622000	43821000	54119000	50801000	51431000	52641000	49844000	49324000	49212000	51766000	52892000	53393000	49188000	47118000	55670000	51789000	50073000	59078000	51729000	52831000	48545000	63153000	53002000	57618000	51104000	48329000	52293000	49144000	50379000
0	0	0	0	0	0	0	0	0	0	0	0	0	0	0	0	0	0	0	0	0	0	0	0	0	0	0	0	0	0	0	0	0	0	0	0	0	0	250790	0	0	0	0	0	0	0	0	0	0	0
13635000	15189000	15172000	15550000	15281000	15484000	14927000	14232000	14596000	15494000	15452000	15891000	16290000	15524000	15538000	17070000	17022000	17195000	15819000	15078000	16457000	14664000	14927000	15680000	15755000	15163000	16234000	16793000	16162000	16169000	16161000	15098000	15431000	16194000	15589000	16126000	16171000	16326000	16692000	16738000	16072000	15059000	16908000	15570000	16711000	16217000	15369000	16292000	15095000	15392000
221760	204980	134630	180370	204300	214670	172430	153910	123040	219790	170730	213040	142000	231250	211630	187020	175830	107740	220660	180940	163660	208270	186040	241810	169530	222290	219240	277870	172410	128140	93946	139940	190560	163440	218980	207360	165390	136940	166640	173210	241540	184110	209320	108420	216500	179370	238220	150570	195330	115830
13344000	16489000	15341000	16231000	16839000	13487000	13963000	14187000	14168000	14258000	14065000	15706000	15540000	14951000	14287000	15360000	14824000	15822000	16841000	14887000	17031000	14397000	15645000	15685000	16936000	15559000	16177000	16717000	15176000	15860000	17382000	16457000	16997000	20952000	19616000	19548000	16272000	15899000	16819000	16623000	17573000	16383000	17784000	16359000	19814000	17936000	16625000	18068000	16091000	15507000
13670000	16444000	15843000	13534000	12891000	13762000	9536100	9449100	9661100	11037000	10747000	10913000	15868000	14917000	15577000	15480000	14802000	15055000	11778000	11784000	11657000	12172000	11650000	11869000	15503000	14787000	15185000	15930000	15611000	15511000	13913000	13159000	13633000	14054000	13449000	14258000	12560000	12275000	12753000	12520000	11044000	12091000	13084000	12486000	13164000	11178000	10623000	11609000	11568000	11030000
1053100	1270500	1570100	1536200	1309900	1502000	1734500	1817600	984070	1821100	1487900	1080200	1300400	1765200	1388300	1759400	2316800	1734100	1672700	1540800	1542700	1853700	1612600	1947700	2194400	1827300	1921600	1021700	1647000	2060800	1579600	2046900	1710800	1447800	1532200	1700400	1416200	2201600	1691400	1580000	1623000	1739300	2131400	1081900	2565100	2197900	1518100	2115600	417560	1664900
443440	560250	307200	587830	468390	567430	500670	476580	597600	411180	406770	474610	749230	365970	534310	717270	658320	589940	357710	398630	301190	454980	392200	456990	260660	378450	396570	268670	469960	246380	421930	410560	487790	545270	281880	517750	440680	345850	101090	173710	578040	633700	456280	495120	505670	534670	497440	585010	479990	377200
0	0	0	0	0	0	0	0	0	0	0	0	0	0	0	0	0	0	0	0	0	0	0	0	0	0	0	0	0	0	0	0	0	0	0	0	0	0	0	0	0	0	0	0	0	0	0	0	0	0
2222700	2434900	2296200	2463500	1965900	2341500	3350900	3173300	3260100	2968500	3662300	2529300	2560700	3336600	3555100	3526500	2973100	3225600	3557300	3448500	3179400	2725900	2392000	2769200	3262500	3335900	3391600	2813600	2424600	2748400	2955800	3056400	3513500	3899400	3673500	3096100	2612900	2829900	3272100	3036000	3184600	3418900	5074000	3455100	5316400	3493700	3997900	4213200	3172800	3330000
17022000	15648000	21002000	20051000	20316000	20327000	20315000	19475000	19611000	22003000	19028000	21059000	20649000	20631000	20606000	20642000	20136000	21497000	22059000	23548000	22070000	18176000	22576000	22522000	21542000	20463000	22651000	21269000	19227000	21310000	19286000	18334000	19912000	19724000	19409000	17265000	19655000	21810000	21116000	20551000	20388000	19184000	20904000	22772000	24438000	21039000	21059000	22515000	17576000	18683000
7933000	8936500	8928000	9100400	8846300	9113000	9455300	8620400	9608600	10085000	10302000	10069000	8952400	8942100	10358000	10345000	10996000	10851000	9961800	9861500	9479100	9903500	9301000	9812100	10025000	9205500	10502000	8975400	8451400	9190800	10637000	10055000	10310000	9797900	10052000	10820000	10176000	9585500	10451000	9684500	10133000	9268400	10322000	10396000	10696000	10039000	9436300	9785000	9833100	9907600
768790	1101100	940460	1324600	1428800	1472700	1164400	1065900	1174400	1184600	1193900	1320800	1324700	1236500	1710200	1021700	1322100	1340400	1419700	1374600	1034500	1347700	1690100	1019800	1603800	957710	1831900	1290100	1180100	1395300	1428500	1487100	1408000	1436400	1052400	974030	1768700	1183500	1409000	1268700	1371600	1449400	1645400	1437700	1902400	1243200	1739000	1375300	1289300	1081600
3060500	3297000	3500900	3279500	3299200	3095400	3655200	3669100	3584400	3371600	3761400	3867100	3354600	3577100	3339800	3461100	3856500	3679400	3650100	3289600	3242800	3078800	3127100	3246000	3539000	3479700	3449100	3078600	3181800	2656800	3151100	3295200	3374100	3162000	3492100	3586200	3266700	3261000	3457500	3589100	3560900	3169000	3703600	3234100	3471600	3379000	3287800	3343900	3262500	3274100
2779000	2977000	3230500	3252100	3261100	3192200	3763500	3489500	3687700	3863200	3651300	3915400	3683200	3195600	3555300	4245000	4093200	4096700	2983400	3079200	3610100	3162700	3333900	3558300	3511000	3732500	3524200	4196900	3995900	4098100	2918600	2624600	3039400	3238600	3681400	4129100	2780700	2709300	3061900	3659700	3483700	4154300	4243300	4167500	4416700	4226600	4397800	4515100	3144300	2882300
245380	305520	329830	276280	331360	265040	314290	294450	290820	331930	265010	363420	310770	342200	274840	360630	374420	350690	400820	341210	339250	253770	328310	341380	287990	324110	307380	246320	264110	299570	275950	266400	271300	232270	237130	207140	329150	309200	325330	251500	282190	253620	182720	267060	298030	250330	255210	295110	214970	242600
47148000	50480000	51232000	45706000	44081000	45503000	54948000	54661000	56020000	52478000	53160000	54888000	54420000	54870000	55280000	57379000	56917000	60306000	55890000	55015000	57702000	56918000	55283000	56584000	59413000	57723000	58401000	52946000	53485000	54001000	55714000	53640000	57508000	50853000	50353000	51137000	56268000	56305000	58943000	54479000	51599000	53232000	59603000	54783000	58793000	52298000	51265000	52642000	54444000	54100000
1504900	1559800	1578800	1809700	1798200	1532700	2043500	2029500	1905500	1777800	1769200	1898400	1969700	1752800	1692700	1574600	1654100	1659300	1959600	1713100	1722200	1833100	1616900	1772800	1998900	1781200	1737300	1870500	1883400	1908200	2073100	1920400	2031900	2116600	2169500	1984700	1719400	1790400	1677800	1860200	1728800	1720700	2332500	1918100	2179500	2117300	1957700	2040900	1872500	2006400
8984600	9907900	10053000	9252200	8295400	7936700	8184300	8006400	7931400	7590100	6972800	7101800	10451000	10080000	9956800	9042700	8405400	8645700	9124900	8372000	8216200	7518500	7460400	7558000	10161000	10073000	9983900	9699700	9419800	9640200	10651000	10301000	10273000	7817500	7920900	7901600	10045000	9221300	9695800	7749700	7559100	7125000	9277800	8686600	9376600	7383200	6769300	6965000	9108600	8288700
9308	16205	0	0	12120	36891	43211	76109	0	0	187260	197870	29937	21416	0	55138	17028	30146	15165	28310	13142	24097	20343	18852	28060	27035	26893	10635	28105	23544	26003	0	0	21984	26733	21691	38126	9913.5	0	19261	0	0	12452	0	18616	26103	27447	21276	18846	39736
121830	120960	139790	70514	112280	116070	86725	75121	44418	0	16915	27504	20907	137270	144570	99526	111520	108300	65821	114470	137260	77422	22891	56147	122930	44964	149300	104240	66246	80094	127040	107690	91180	70482	74053	69752	100200	67236	110250	80829	37508	88620	81865	83966	0	14696	64603	43642	17604	106830
3106300	3330300	3379000	3260900	3258200	3173700	4056000	3962800	4067000	3803900	3778100	3906800	3674300	3643700	3773200	4314600	4069500	4220900	3438200	3474800	3747100	4165200	4061600	4179000	3766100	3940700	4080600	3051400	3253700	3123800	3412200	3509800	3505300	3336400	3634600	3970700	3244500	3504400	3316000	3344400	3527200	3491800	4033900	3585000	5666100	4153700	3543600	4246900	3551100	3742300
498570	519660	554450	530060	502210	487440	473770	484690	514290	519370	489520	556110	585390	612680	504290	536980	558490	574190	481320	487160	510770	522980	237440	467230	503990	551890	596180	520120	496060	570610	483690	520600	558010	488510	464500	469080	540320	552820	529690	564110	502110	513570	525160	520750	528530	504550	486740	498600	492040	467540
1860200	1992600	1613400	1890700	1908400	2040700	1913500	2333300	2003200	2047600	2054900	2025500	2268700	1938100	1957300	2186300	2371900	2236900	1946300	1892800	2091000	1764600	2127300	1645200	2044900	1653200	2127900	1986800	1956200	1819100	2018100	1945500	1958500	1793200	1844800	1552600	2049300	1948600	2103700	2116600	2226400	1981800	2135300	1990100	2086500	1955200	1828900	1941100	1935100	2049200
4920800	5314500	5743000	5619300	5624500	5757300	5202700	5358600	5207100	5401100	5426400	5532400	5856700	5573800	5727900	6168900	6171300	5990500	6342800	5970500	6481200	5754900	5813600	6140200	5889400	5299000	6049300	5166400	5724800	5769400	5621100	5310300	5856000	5287700	5267900	5450900	5691600	5597900	6102500	5605700	5714300	5253000	5528500	5464700	5832100	5387800	5652600	5878500	5469900	5305400
264220	287560	301500	336750	332320	243000	234350	276380	159880	57723	180690	226270	158120	205110	233740	242900	284210	431170	378460	301990	375150	273680	273600	309420	282890	105290	319790	247190	209360	196490	186070	323630	91720	74247	233350	107620	352790	207220	279600	187770	245850	349670	268350	75667	203220	0	218690	0	313720	222340
271100	263850	59718	164360	214120	309530	90110	196090	172250	339490	213320	244990	285700	304980	121660	400900	224800	423010	163870	566830	424970	261440	337520	226320	142130	290160	139420	279330	382770	123920	357210	160520	161210	263050	537690	401480	242550	192250	175970	344280	179600	114200	265270	235630	153660	194060	365660	377050	201160	146150
486840	235820	143250	1069600	1268200	43859	290820	775220	222940	555060	822760	121030	399300	1260100	255810	299890	791740	204970	517170	402210	1483700	239900	682930	1026900	0	1063700	218920	53448	933930	203860	1600800	1487800	2166600	49234	495180	40669	115350	76501	202030	2384100	577890	194250	609870	266440	913280	143410	264350	540750	259960	1492300
13147	32752	101630	107610	113770	0	34109	0	24100	88487	25995	130380	43418	63579	0	74941	185980	0	41288	38308	66729	60509	0	57423	54449	62569	49215	22127	152430	0	0	0	39120	0	21296	15712	56066	9350.9	0	0	28263	0	0	7832.6	13352	25869	0	24168	68691	0
1711000	1518500	1999200	2010900	1877700	1977900	1984400	1915600	2050600	1805700	2056700	1990400	1960800	1931900	1765000	2039500	1744500	2246900	1446300	1951000	2049300	2043700	2300100	2162200	1979000	1802300	2105100	1813700	1977600	2033600	1875600	1689700	1792500	2335300	2163500	2181400	1785400	1895100	1972500	1890700	2079800	2033600	1909400	1928100	2246800	1716300	1992100	1792300	1749100	1919200
45202	31470	141540	107280	43890	50231	49952	90839	81007	31231	133950	90462	153070	46139	273040	194520	64299	17211	55457	90660	185750	230010	38795	113640	50181	39548	57381	128340	58191	10561	23202	79383	92441	63202	65106	53644	140530	27037	122050	82453	80063	264450	46574	56108	0	131990	42090	82197	74935	119260
506940	597780	802180	776930	650690	690970	680820	704300	811910	783040	868240	822750	807490	861180	861440	727310	706160	751610	571860	597370	715060	588850	539100	517870	634130	661660	704920	681650	642710	801980	731530	773670	704270	611040	710660	473370	675570	662380	802550	734880	785100	784700	735290	642390	701450	741930	557610	573840	615300	666210
548700	723200	493410	518250	660550	702580	755060	655550	767650	785720	798650	716820	771990	630290	686190	792700	802260	886690	615980	631750	696780	689730	715990	820450	547630	558720	733720	671300	611110	741090	399220	593280	660180	636360	697500	792710	294160	363070	535150	659330	768400	736320	611780	622720	702470	884600	701380	838180	567410	588020
240160	188710	248250	333510	232290	277460	197070	95130	249800	228620	289940	282370	245870	189930	226180	394800	334500	362380	240690	130290	154050	181740	115760	238510	168030	204370	330380	206840	136170	295980	328950	332590	267140	210730	135800	261580	114820	312900	134590	195900	176740	269870	275340	309580	203840	174780	279310	160730	308920	219440
0	0	69513	0	0	0	0	50596	25094	0	58521	60926	0	0	0	0	0	62011	0	51193	59193	0	59258	38326	0	30655	39238	0	54928	0	32424	40950	0	45432	0	37275	0	0	0	0	65388	58065	27045	42269	0	0	36632	49008	45258	0
1115200	1341900	1363300	1325100	1025700	1283000	1273400	1276100	1254300	1245400	1143800	1325600	1353300	1400900	1512400	1453400	1451800	1450700	1452200	1589200	1691300	1340900	1453600	1299000	1512600	1328600	1412700	1269900	1354400	1363600	1369400	1249300	1327100	1410500	1265100	1595500	1366400	1464600	1392600	1557800	1351300	1289200	1346800	1253100	1231700	1277500	1252600	1346300	1446300	1156100
40030	0	6671.9	47742	37876	45711	28161	19803	0	12772	0	0	34515	15567	6003.3	24236	21062	21661	0	0	0	30785	17146	33528	0	0	0	44044	36500	0	17385	46105	35412	45227	24411	41691	35873	47040	0	40174	28184	35967	29897	0	32990	17575	40255	0	24906	0
2262000	2426300	2158100	2011900	2034700	2185700	2626300	2585600	2972600	3731100	3299800	3594600	2527100	2299500	2408900	2823300	2544600	2672600	2191900	1994900	2186400	2078800	2130100	2244800	2030000	1832100	2077700	2157300	2194600	2433000	1617100	1551800	1695300	1477100	1449500	1428100	1451200	1531200	1468600	1563900	1763200	1716600	1508800	1542100	1631400	1686400	1643300	1797000	2085000	1975300
175090	180130	217980	152250	162790	300010	168000	180780	161440	240970	264280	189470	185430	88676	169530	246730	204480	85902	126330	144940	72219	212570	240250	177710	210430	243810	320350	190290	37468	162460	173780	85220	148720	192700	162420	100490	174230	235930	159200	191890	179530	110360	205900	166800	168530	81728	290350	191710	226450	135580
1004600	729180	652360	947670	1081900	954890	1179100	1069500	1032900	1051000	824900	914840	1158800	660460	975930	1041600	867150	1093900	887360	996010	855790	890100	1229500	800830	1209000	853700	906340	1216500	1101800	830090	1094300	821680	962250	1014700	803690	862610	1123300	988900	1214900	1046000	819910	1012200	976700	968110	1004500	969850	886850	1120100	1097900	845800
1230500	1305700	1292300	1336000	1461400	1502100	1354900	1479000	1426100	1506400	1428000	1645000	1467500	1333700	1227400	1658200	1610900	1648700	1526400	1547900	1249800	1297100	1465200	1415900	1457700	1508300	1562900	1454800	1491200	1535400	1364400	1357800	1469000	1222600	1503900	1332500	1398300	1411200	1579100	1455100	1556700	1507400	1569000	1552800	1545200	1631700	1623900	1460600	1439500	1464000
73519	136660	156400	108430	130510	145230	126590	135720	138240	137190	86946	119960	92131	71765	77956	88355	101630	128700	73004	87306	102480	79138	113660	40542	133210	87499	139430	133930	125980	168490	184420	159620	86507	124480	166860	137580	144140	146540	80615	73356	138320	124060	230440	38161	116490	152120	63400	117220	172530	112450
0	0	0	0	0	0	0	0	0	108350	0	0	58388	113740	0	0	0	0	0	0	0	0	0	0	103930	0	0	99238	0	0	0	0	0	0	0	0	0	0	133840	120510	89881	0	0	146120	0	0	0	90294	0	0
1452000	1297400	1583000	1521000	1567400	1667200	1518500	1427500	1644700	1497500	1694100	1615200	1553800	1537800	1760400	1627900	1755400	1808500	1555100	1514100	1723800	1644700	1465100	1816600	1562400	1617000	1748900	1670500	1662000	1648700	1469100	1364700	1461500	1525100	1164900	1333700	1638500	1706900	1793300	1624200	1602700	1712600	1539800	1484000	1649500	1544900	1419800	1385300	1412300	1439300
377920	394130	373870	369680	442650	397770	157110	241610	543650	572980	330170	558160	509530	459740	301210	514900	506490	577060	471930	516170	597140	179600	566800	520370	139390	983130	592280	448440	398560	435650	465880	846220	531200	457460	411180	473030	542730	493590	348780	572780	362010	500600	555560	550750	535970	461110	465780	539470	464750	460380
5095300	5860800	5829700	6096700	5942600	5960200	5102700	5133500	5457000	5618700	5635500	6103100	6014400	5752800	5631400	6447200	6472100	6479700	6190000	6157100	6653100	6035100	5745200	5744500	5766900	5766700	6085700	6060300	6035500	6188200	5111700	4819900	5118900	5031200	4956200	4367600	5376700	5732500	5649500	5897800	5472200	5348800	4957500	4820100	5075000	4618000	4515000	4749700	5057900	5087500
0	0	0	0	0	0	16648	20135	0	0	0	0	0	16611	0	6789.9	0	0	0	0	0	0	0	0	0	0	0	0	0	0	0	0	0	0	0	0	0	0	0	0	0	0	18629	0	0	0	0	0	0	0
402740	407110	377610	435410	476750	398910	389400	421600	451820	356980	459360	442960	423690	515020	395240	373450	608930	735670	296760	483370	425090	430260	471540	391420	195480	322180	437140	473810	578290	419310	367590	402290	473060	443340	408380	391230	510000	453750	466150	269350	404820	531830	406570	435090	409310	432790	435660	494170	584690	374970
1118600	1302300	1355000	1271600	1213500	1072000	1301600	1224300	1056500	1460500	1301000	1220900	1127000	1294100	1056700	1108300	1090200	1028500	1501400	1076200	1188700	1220300	1255100	1318600	1243900	1168800	1293300	468600	1141900	804840	1377400	1238700	485330	1102200	1277200	1326400	1063400	1321500	1262200	1098400	598390	1052400	1486000	1115800	1188400	1085200	1185300	1005700	1098900	1185900
603770	623750	577000	552580	614370	591300	543670	576540	545760	601570	575540	600190	651680	594360	660080	695460	687670	769230	523840	538480	612940	549950	690010	611990	622700	677570	672770	591150	549250	604210	582210	546920	621040	510540	551280	569500	595590	617200	587000	587850	573550	566590	613750	576870	645260	546860	548820	580390	543530	565330
1029500	1340500	1163400	1051000	1519700	1267300	803070	1587100	1430600	1260000	1408200	1042900	1386400	788180	1419200	1213800	1168900	1143300	1066900	870000	1050500	1174100	1224500	1332800	1290600	989060	1317600	792760	1270600	1727200	1126300	1197700	1190200	1179700	1145900	1453200	1271200	998950	1262600	1200700	1519100	1421400	1244200	1218500	1122900	1436200	1393500	1430100	1493100	1292000
2199700	2543600	2329700	2161200	2246100	2304500	2306800	2452600	2428000	2338000	2476200	2518400	2279500	2332400	2319000	2171500	2143300	2370700	3058600	2574600	2780700	2358100	2521500	2701900	2307100	2238000	2264400	2093600	2166300	2316800	2441100	2467400	2329900	2125800	2402600	2326900	2629900	2194100	2665100	2242500	2345200	2292700	2501100	2342200	2577900	2361100	1961100	2709100	2259500	2071800
9148200	9983100	10003000	9776700	9286700	9546100	10395000	10254000	10309000	10139000	9700200	9969700	11424000	10929000	11033000	10152000	9493500	10079000	10736000	9786200	10632000	9561900	9541300	10439000	10921000	10683000	10605000	9607000	9783400	9933800	10837000	10273000	10501000	9284000	10367000	9605000	11197000	10604000	11377000	10777000	10189000	9998700	10869000	9871500	10602000	9915100	10154000	10040000	10030000	9951800
691890	723220	681700	809830	604710	614740	701350	717060	668990	1045800	824730	727150	625420	596900	647830	689440	783980	562530	854100	702450	1090300	620290	745320	684510	791440	810700	706590	930590	789910	1175200	891810	770360	696310	930270	663100	644590	489840	743540	574300	821160	746300	828370	836250	338880	355360	581950	549520	696030	963440	749790
215240	318060	331720	291380	304190	216970	320190	136320	106450	235420	222620	204500	96216	184470	147440	72985	65841	75577	51904	119020	23498	69652	70273	125720	237980	86202	120030	190410	268590	163290	54955	60823	68459	182590	96921	73122	80728	69375	125900	106660	40380	160980	45432	138720	94315	43920	44417	111260	282110	153460
1313200	1375700	1590700	1502000	1520800	1329100	1224900	1338100	1415000	1497700	1446000	1546600	1446300	1456800	1401500	1759700	1531000	1603200	1527300	1360900	1477500	1422100	1410800	1521000	1518800	1372500	1492900	1533000	1411100	1485700	1392300	1320100	1281300	1325900	1336300	1406200	1387400	1427700	1472200	1386300	1428500	1472400	1356300	1324700	1437400	1247200	1389600	1442900	1331300	1309100
1215700	1328000	1354700	1486600	1567800	1279000	1209600	1171900	1253500	1346700	1278500	1303400	1388200	1197500	1363700	1529100	1462300	1791000	1293300	1390900	1292800	1112500	1483000	1589600	1411400	1152500	1422200	1546100	1483000	1660700	1283600	1342900	1351100	1209800	1292700	1432100	1392100	1299500	1491200	1512700	1451500	1127900	1464400	1395100	1511500	1398900	1226600	1536100	1458800	1281000
1960800	2168400	2120000	2004000	1878300	1990600	1983500	1917900	2015300	1935100	2075400	2090000	2298800	2104000	2271700	2336600	2401900	2326300	2294200	2217300	1869000	2079800	2121800	2262900	2416200	2129500	2236700	2048800	2227100	2205000	2023000	2058700	1948000	1076300	1990600	1573500	2175600	2320800	2352900	2353600	2138100	1860600	2155300	1890900	2128500	2051700	1877100	1998000	2045000	2088700
0	0	0	0	0	0	0	0	0	0	0	0	0	0	0	0	0	0	0	0	0	0	0	0	0	0	0	0	0	0	0	0	0	0	0	0	0	0	0	0	0	0	0	0	0	0	0	0	0	0
0	0	0	0	0	0	0	0	0	0	0	0	0	0	0	0	0	0	0	0	0	0	0	0	0	0	0	0	0	0	0	0	0	0	0	0	0	0	0	0	0	0	0	0	0	0	0	0	0	0
19442	9862.3	88425	92558	86025	91559	99146	43496	47302	40500	33639	78670	57361	72240	0	66547	61405	65428	72554	131770	64149	73742	123450	118860	82980	45859	83943	105960	110570	52628	73880	72826	69753	33789	67011	56883	42643	68157	53166	96349	66557	27603	52841	80290	41816	58556	58794	71367	35001	71355
621370	927670	853630	529160	662980	786440	855560	703080	863640	585260	963150	748850	604650	549420	996430	1116700	955830	715290	858330	874830	563640	788910	1402100	761930	823290	904770	1012400	877640	1001800	881000	490000	803390	776440	1108800	866130	1000900	777710	1013800	599190	900470	800710	962190	993970	927710	1041300	1737400	1103100	1032000	971190	948450
3811000	4053200	4066500	4066900	4077100	4158000	3724600	3978100	4248100	4173100	4118000	3897000	3820400	3717400	3576700	3986300	3896100	3312700	4261200	4023000	4142300	4231200	4077500	4460000	3728900	3317400	3611500	3460900	3763400	4137000	3531100	3705800	4013700	3398400	3902700	3849000	3840000	4003600	3860500	3705700	3759800	3811400	3772100	3220300	3736300	3706700	3504300	3694100	3875700	3837500
596660	696410	793380	758290	746370	561090	833760	785020	908680	863360	794220	886010	626690	612240	536290	503890	588940	515550	641930	482270	602020	387680	305640	580420	574050	533960	468340	621470	715290	721060	799190	827440	774410	663970	858620	770290	626240	704370	654380	560280	703670	418070	697140	635720	674780	803410	760440	595720	573260	698380
460360	491310	533670	603210	555920	557590	617260	552330	483610	427620	539940	544730	512870	525330	599760	611800	641360	698340	521770	580520	427650	660470	541180	569780	524040	638060	635080	612260	612620	559390	552050	428420	545760	515680	527530	538780	619200	504070	496560	581200	598830	599230	542640	505190	500290	499120	446920	409960	530700	529260
3735800	4293100	4115100	3793900	3845500	3849300	3601600	3623200	3695700	3859100	3886200	4281900	4134900	3815700	3868000	3787700	3765600	3828300	4004200	3820500	3973100	3620600	3468300	3799500	3872500	4054600	4137000	4022700	4025700	4069700	4051500	3890200	3971300	4019600	3853100	4204100	3391400	3621200	3713700	3596600	3601500	3370000	3954500	4065400	4087500	3715600	3488800	3768800	3502600	3508400
7519.2	0	15779	0	24458	0	0	0	0	0	26964	41263	30625	41936	0	52643	0	29750	0	0	0	0	0	9794.3	34333	0	24826	0	0	27013	0	0	53909	0	0	0	0	0	0	0	35612	24537	0	0	37037	0	0	0	16256	32039
651070	880580	491360	683410	785040	72320	673440	589720	757180	763260	0	714060	896910	965780	873530	893970	824530	897350	859190	839610	597350	831860	599880	570280	1392800	982260	899950	837760	847040	2020500	907180	385290	856350	152150	792740	775200	673360	206870	865540	563560	1113600	641890	828210	956050	905650	698590	503920	930160	718860	769050
2841500	3460300	2652700	3274700	2936500	3359800	2818400	2917600	2992600	2888800	3173900	3038200	3083400	3206500	3390900	2972700	3006700	3127900	3082300	2871100	2666000	2840100	2744100	3002400	2953900	2918800	2833600	3833300	2974400	3551800	3129600	3354700	3004500	3118100	3033000	3172100	3115200	3244400	3345000	2727500	3286400	3006000	3158700	3449900	3204700	3482400	3163300	2977400	3177700	2858500
0	0	0	0	0	0	0	0	0	0	0	0	0	0	0	0	0	0	0	0	0	0	0	0	0	0	0	0	0	0	0	0	0	0	0	0	0	0	0	0	0	0	0	0	0	0	0	0	0	0
0	155720	107000	176240	194420	140210	168240	61096	112660	141960	125340	86160	132000	52708	219750	108340	136490	113020	222400	29282	78625	173490	63078	150120	67902	79601	172000	43258	147330	112840	91062	114030	115140	28362	55643	60141	14720	160040	64360	152960	116960	119470	76844	25260	48822	119110	8690.3	32328	107210	124090
3526000	3536400	3759500	3832400	3803100	4001200	3274500	3492400	3609300	3869200	3756600	3898300	3663900	3645100	3774500	4384500	4193200	4247300	3601800	3657400	3581700	3554200	3623200	3866600	3881900	3701000	4033100	3788500	3777600	4148800	3461300	3328400	3457200	3467800	3599300	3625600	3536400	3438400	3501200	3948400	4037900	3971700	3678400	3437500	3695700	3696100	3675400	3881200	3463300	3465000
727290	804500	786200	868700	884600	710220	991280	950440	895910	890770	804590	837990	899170	803440	772850	837180	735260	543820	1007100	746970	1016700	588050	612050	610120	813220	804140	496070	909800	839600	939260	1048500	1029800	1073000	1131300	1035300	778380	883100	893230	780230	932560	887830	879440	945380	889120	768980	1061900	911520	980310	847600	912850
482760	524930	553870	463340	445010	488290	458930	341770	459930	491680	490600	518590	453630	488730	521100	477760	348400	424280	467260	519160	420970	467320	499210	491940	330590	364810	447770	506910	521420	552490	414220	419880	537470	470120	347810	316540	373720	543460	536090	415330	493800	490300	397620	385250	406150	396790	368750	476840	477240	325840
2917000	2970500	3069600	3003600	3066900	3138300	3114100	2908500	3034700	3360200	2974200	3342000	3687800	3479800	3632300	3455700	3135300	3499100	3429200	3153200	3504800	3143800	2871300	3014000	3263300	3260100	3313100	3530500	3153700	3636900	3497800	3446900	3317600	3086500	3075300	3214800	3632800	3461000	3868400	3527000	3798300	3231700	3816700	2157300	2730900	2956800	2524400	3133400	3288400	3279900
38690	0	0	77239	0	0	0	0	0	0	0	41493	54484	84059	0	80519	0	0	0	46186	0	70641	57220	0	67581	141730	0	70902	67851	0	0	93394	0	58962	61120	90467	0	0	0	73984	0	0	0	81280	51073	0	0	79766	78529	66141
204500	129370	540310	282970	249950	281300	339280	476680	335810	340040	334110	305550	237820	314890	293630	461820	488010	252780	224610	290710	310010	267490	81582	494560	173350	374660	249460	395980	388960	417970	308500	326750	244700	272010	449670	195030	479180	388290	253700	366010	342250	242270	365160	368310	441190	305630	426740	343280	271050	439650
584730	498100	672620	523140	697790	513460	519970	660030	544970	585520	336790	497930	638610	392900	551260	840210	745690	616930	525260	405920	631820	627060	590820	652560	669390	517220	591700	579730	564490	634260	530120	527310	527850	556200	455000	576150	209920	476580	595090	477140	669750	614110	400500	318790	528160	593450	490230	550690	490380	580450
0	0	0	0	0	0	0	0	0	0	0	0	0	0	0	0	0	0	0	0	0	0	0	0	0	0	0	0	0	0	0	0	0	0	0	0	0	0	0	0	0	0	0	0	0	0	0	0	0	0
1672000	0	1590000	0	0	0	0	0	664540	2476700	0	0	616200	0	0	2377500	0	0	0	2439500	0	0	0	2438100	0	0	1582700	2405800	0	0	0	1594000	1679200	565130	2418100	1771400	0	0	1497800	0	2656300	1298200	0	0	0	0	2148000	712610	0	2299900
349500	227630	580680	262340	398600	406130	328210	497810	354990	393050	371010	400540	302050	492900	450400	468330	317650	348490	405890	382240	495350	417550	444440	542970	312560	322140	426080	420720	284260	340180	379670	162890	346590	172230	242760	293660	267290	374370	386280	351910	415250	387200	137550	154290	200020	348780	321620	275690	222770	331070
26620000	29593000	30339000	32261000	31579000	31543000	29014000	29734000	29283000	30929000	31118000	31442000	32166000	29905000	30618000	34971000	33417000	33791000	32147000	30912000	33148000	31766000	31084000	33235000	31635000	31586000	32396000	34585000	34496000	34441000	31187000	29584000	30564000	31945000	31261000	33259000	30632000	31203000	33762000	31719000	32232000	31513000	34655000	33036000	36420000	33746000	32542000	34593000	30586000	31074000
98526	131600	123130	69529	151500	39419	86679	70086	97389	119170	56780	47000	87619	85444	104550	160510	144240	135850	146870	120440	143060	134650	64897	114240	113740	98129	114020	56151	78040	79073	18546	42127	53375	75477	92895	141350	111070	138040	66867	81745	109770	119520	0	79834	22288	113640	141200	89010	76350	46329
433310	651950	618670	732110	577580	535730	688060	700030	507210	592740	571940	581310	370170	397440	535480	331640	189840	199420	584630	521880	489920	552330	522030	556480	557790	522220	235010	522060	592190	607530	542910	617520	439790	621880	588670	551960	549820	534890	301680	657570	561760	425430	614650	569240	587990	592510	357360	537070	436960	567630
3817800	4257400	4206600	4363000	4315800	4435100	4073800	3900900	4332200	4110400	4255700	4406700	4525500	4365000	4331100	4405000	4719000	4752800	4502700	4460900	4536000	4388300	4361400	4699100	4597500	4454300	4601300	4176900	4198200	4674300	4349800	4280000	4506200	3930900	4201300	4054000	3928500	4288500	4578100	4309100	4357000	4187100	4274000	4525800	4405600	4239600	4182500	4225600	3955500	4191500
4953900	6101100	5527800	5563900	6444700	7124000	6875500	6648600	6672000	7152500	7785000	7655300	5631100	4578900	5703400	7504100	5222200	6896400	5693000	6218000	5771300	7093300	8267300	6726900	6525400	6102900	7046300	7114900	6992200	6580200	5452000	4830000	5349100	3292300	3174600	2289400	5996800	6808700	6613100	6410700	6282700	6359600	3592500	3109900	3495200	4211200	3212100	4856900	5529900	5467300
1879600	2460600	1844000	2489200	2698300	2933200	2792600	2652900	3192000	3286600	3120000	3185700	2893100	2433600	2549900	894690	1843200	1249300	981550	2673300	2515900	2812800	2247200	3242600	3688300	2330200	3136000	2382500	2211000	1430000	2122100	2970700	2421900	1313000	2464800	1222100	2476200	2160700	3095400	2847300	2909900	2128300	3074400	2179900	2943500	1391200	1845200	690740	2091900	1125600
100720	121190	42550	89241	62021	76621	78129	113460	57344	188890	77143	19029	171170	116690	125530	133470	151500	106560	206140	97448	144560	28131	30919	201040	149640	142870	131160	148160	142900	0	115810	164740	132020	151430	199180	127020	89741	155310	217210	178690	198220	149160	118000	155110	103970	122600	149370	128620	127290	95859
202180	228610	233540	270570	224090	200340	233980	253030	253560	212650	218690	242170	259900	215550	233200	240290	217380	254000	307090	310130	331730	258860	275430	295830	246890	238660	224860	233480	210880	209920	203650	245210	129580	220180	255360	227110	210620	209500	244180	217190	247420	211780	272380	215280	235610	68888	222810	137550	237180	235790
3188500	4008200	4019000	2967600	3330900	3488000	3513300	3670800	3641700	3567000	3405500	3509700	4196300	3985900	4295900	4525400	4294900	4465700	3997000	3841800	3771500	3840900	3814100	3887300	4400100	3915500	4390000	3730500	3725500	3710000	3966900	3659700	4020600	3611000	3027300	3611700	3655400	3973000	3324800	3402800	3433000	3358300	3771000	3467100	3968100	2967200	2597300	3201600	3557200	3760000
106220	61934	116990	74624	64148	72086	0	0	0	99732	102440	97645	37978	73495	54913	110480	0	0	0	0	0	292760	323050	267640	0	0	0	226600	66308	0	0	50757	0	0	0	0	50252	77305	33359	24298	102530	30489	0	0	0	123190	61724	129530	0	55036
65965	64166	97822	75696	57258	56386	55916	35103	11835	56055	65543	72221	80038	71955	97400	80603	82581	101410	26035	40030	80250	60176	55006	57129	26626	17504	0	77782	89195	98733	50591	88055	41679	0	70355	66365	57848	90702	51816	32536	69642	47284	69631	43781	47968	152760	90468	70104	61716	67168
1726700	2059900	1735000	1935500	2226000	2208900	1825600	2026000	1883300	1780800	1852600	2159000	2081300	1751900	2115700	2102600	2154200	1810100	2221500	1902700	2226000	1994500	2017100	2040700	2184200	1764700	2222500	2332400	2228800	2110700	1938500	1757300	2094300	1838500	1956800	1883500	2000800	1992100	2215600	2242700	1862300	2140900	2036500	2141100	2005800	2183000	1961600	2173600	1865700	2163300
1278100	1268700	1315900	1390500	1280200	1415600	1469500	1312700	1301100	1430400	1221300	1392100	1437400	1478500	1414700	1565100	1431600	1564600	1390100	1525600	1490400	1535600	1479400	1505600	1554100	1550200	1544300	1452700	1346300	1445300	1444500	1430000	1478900	1263700	1343600	1362800	1438500	1487500	1514900	1448700	1353000	1411700	1443500	1286900	1354800	1336900	1277600	1309100	1302700	1336200
1443500	1749500	1533800	1540100	1549700	1607300	1311600	1238200	1261800	1394800	1376500	1073900	1289800	1547400	1483600	1264900	1285300	1377900	1577100	2139900	1960500	1566900	1449200	1563600	936410	1197100	1238900	1175400	1289600	1451300	1396900	1358100	1705800	1359800	1670400	1746200	1553500	1636400	1567400	1748600	1517200	1628500	1056200	1142900	1402800	1340900	1566600	1505700	1446600	1302400
0	0	0	0	0	0	0	0	0	0	0	0	0	0	0	0	0	0	0	0	0	0	0	0	0	0	0	0	0	0	0	0	0	0	0	0	0	0	0	0	0	0	0	0	0	0	0	0	0	0
929260	1130100	1009000	1105000	1022100	1146400	996420	991450	948430	982160	1042400	1124900	1174100	917210	1091700	1227700	1179700	1319500	1286400	1111500	1290600	1035600	1118600	1140000	1298400	940180	1089500	1084100	1033100	1249500	1143200	1128300	1153300	1003000	1127400	1051200	1183800	1211200	1293000	1188300	1224400	1271400	1071100	1155300	1200100	1151700	1091000	1173700	1174100	1131700
10773000	11744000	12427000	11872000	11654000	11599000	11560000	12055000	12189000	12669000	12313000	12406000	12701000	12151000	12549000	12623000	12442000	12795000	11578000	11918000	12984000	11306000	12384000	12965000	12458000	12035000	13105000	12826000	12438000	12957000	12693000	12126000	12891000	12726000	12377000	13107000	12619000	12436000	12893000	12594000	12712000	12303000	12901000	12603000	13776000	13833000	12325000	13411000	11861000	12090000
1095200	1008400	1207000	1144400	1040200	1119900	1080800	1193200	1115500	1152500	1128900	1118600	1276900	1114600	1091300	988440	1025300	1112300	1212100	1122300	1113000	1063300	1062100	1107800	1145700	1063400	1271100	991320	1061000	1110500	1140000	1115400	1212400	1011600	925440	972690	1108200	1201100	1280600	1070500	1181600	1101700	1199100	1087800	1206000	1128100	1086000	1119700	1065300	1125100
0	0	0	0	0	0	0	0	0	0	0	0	0	0	0	0	0	0	0	0	0	0	0	0	0	0	0	0	0	0	0	0	0	0	0	0	0	0	0	0	0	0	0	0	0	0	0	332550	0	0
0	0	0	0	0	0	0	0	0	0	0	0	0	0	0	0	0	0	0	0	0	0	0	0	0	0	0	0	0	0	0	0	0	0	0	0	0	0	0	0	0	0	0	0	0	0	0	0	0	0
1470300	1484200	1644700	1548800	1671200	1526000	1550400	1525700	1520400	1603500	1536300	1670200	1683800	1494400	1455500	1567600	1560400	1680900	1786600	1425000	1438600	1410600	1416300	1452200	1640400	1531100	1601900	1694400	1529600	1692400	1475400	1588600	1569800	1519200	1621900	1638500	1669300	1570900	1706600	1734700	1702400	1589300	1695000	1506400	1677300	1549400	1598200	1692200	1654300	1527100
0	0	0	0	0	0	0	0	0	0	0	0	0	0	0	0	0	0	0	0	0	0	0	0	0	0	0	0	0	0	0	0	0	0	0	0	0	0	0	24501	0	0	0	0	0	0	0	0	0	0
1270200	1292200	1397100	1555100	1453300	1509900	1486300	1625300	1346600	1328500	1215400	1385300	1260800	1213800	1095000	1146000	1165800	1377500	1274800	1127800	1205200	1292100	1402100	1316600	1222900	1191300	1357900	1434500	1213000	1425400	1193800	1190300	1107900	1169600	1167900	1270000	1153200	1208400	1249000	1318700	1179000	1323000	1253000	1171000	1188900	1205900	1305200	1334100	1326400	1251500
3555800	3910600	4127600	4038800	3817200	4073300	3572600	3809800	3872000	3744800	3660100	3675800	4110200	3985300	3981600	3995900	4026200	4054900	4143800	4155400	4025400	3873900	4149100	4066600	4198100	3902700	4100900	3747900	3858200	4028800	4228600	3825000	4173800	4753400	4505500	4318100	4197200	4033400	4399700	3902800	4020400	3785200	5035900	4716200	4687700	4704500	4536000	4788400	3829200	3931900
1370600	1380700	1331100	1360100	1419600	1206500	1295500	1054700	1221900	1379900	1469100	1212400	1810100	1730000	1518500	1885400	2025400	2069900	1475800	1489900	1596700	1585700	1544600	1240500	1511100	1770300	1455900	1811600	1647400	1909600	1429500	1414800	1623700	1324600	1341200	1372100	1496900	1692400	2072300	1476800	1530800	1525200	844480	1318900	1263800	1378500	1369700	174530	1295400	1370600
1657900	1801300	1815200	1874100	1857500	1726200	1569000	1539000	1403400	1496000	1586000	1544300	1674000	1667300	1491000	1703800	1626600	1837300	1702900	1603700	1490800	1543100	1566400	1517700	1580700	1568000	1637400	1734700	1750200	1790300	1710000	1523600	1745800	1816300	1608200	1620400	1629100	1613500	1672300	1531600	1594600	1627100	1548400	1422800	1549700	1572200	1550300	1545100	1569600	1461300
848530	717430	628820	33702	50032	45103	34095	26639	48789	62452	149430	52448	869850	819710	750480	412040	514430	402280	103850	105140	30972	202910	225920	221710	612580	434530	503440	653990	95156	474760	21758	20905	9713.4	23601	0	11832	144300	183280	74264	30171	39120	48973	49436	18653	60753	23092	71539	15993	146140	120100
38166000	41289000	44903000	44036000	40384000	42872000	44765000	47319000	47919000	44990000	42850000	42813000	45224000	45833000	47525000	43245000	42344000	44435000	51671000	54612000	46798000	45183000	47254000	48319000	46379000	47368000	46133000	40107000	42029000	42565000	47221000	45179000	44984000	43503000	49037000	44289000	47563000	41458000	47384000	45234000	45480000	44621000	49944000	48575000	48249000	43212000	46046000	46390000	45352000	44997000
0	0	0	0	0	0	0	0	0	0	0	0	0	0	0	0	0	0	0	0	0	0	0	0	0	0	0	0	0	0	0	0	0	0	0	0	0	0	0	0	0	0	0	0	0	0	0	0	0	0
1234700	1448100	1265900	1318100	1371600	1308100	1441700	1524300	1528500	1410700	1492800	1535300	1381600	1499300	1422200	1534600	1180300	1482400	1560100	1268300	1507000	1504800	990940	1293700	1472700	1510600	1447000	1296400	1281800	1444900	1643000	1351900	1602400	1329100	1304600	1448500	1579800	1049800	946870	1434400	1399300	1542800	1645200	1538300	1553600	1372700	1544900	1499100	1342200	1455400
1442800	1683700	1551600	1531000	1999500	1832000	1319700	1583800	1275800	1562800	1251400	1665300	1386800	1324500	1181600	1385000	1413500	1500800	1384600	1561700	1316500	1227100	1391300	1387400	1226300	1365700	1382100	1650900	1633500	1503900	1599100	1318500	1414500	1680200	1867500	1693100	1493100	1595200	1452500	1617700	1696800	1447900	1525800	1204300	1744200	1812100	1566100	1936500	1856400	1387900
98516	210050	123820	118670	0	86097	194600	278710	195780	257450	72322	126610	165170	119970	120830	232310	41919	82515	48238	107690	71781	170000	34649	86955	77558	115220	0	183430	109820	25076	406260	139340	191450	208140	268520	184890	163800	102090	77109	233370	74189	180160	158030	136300	196910	201560	0	199970	312600	155270
5126600	5305700	5403500	5329100	4752600	5246700	5145600	4901700	4568300	4848500	5464300	5282900	6306000	5890900	5576000	5356700	5123800	4598800	5761400	6413100	6341200	5488000	5435800	4861300	5640100	5433000	5121600	5227900	5101100	5351800	5423400	5690400	5186500	4802100	4911500	5317600	6169000	5964300	6673200	5561100	5855100	4829300	5092400	4910800	5137000	5118800	5024900	5375500	5147900	5088300
3012800	3250500	3054300	3164300	3041200	3154600	2653000	2760000	2594500	2772900	2974100	2114400	3291800	2756500	3273400	3599800	3305000	3482600	2730800	2948900	2355100	3271400	3081300	3256200	3406400	3293600	3382900	3259200	3246500	3139100	2942700	2878900	2941200	3064400	3079700	3200800	2927200	3102700	3045500	2872600	3048400	3077500	2966800	2978000	3237500	3011800	2673000	2766200	2757900	2717300
14234000	17169000	16383000	16781000	15211000	15465000	16398000	16727000	17178000	16344000	15544000	15989000	17118000	17584000	16307000	15454000	15793000	16291000	18213000	13304000	14816000	16599000	16783000	17539000	15978000	17468000	15975000	17804000	16526000	16559000	16241000	16029000	17018000	17156000	16591000	16628000	17517000	15393000	17236000	17393000	16181000	16074000	17835000	17467000	17697000	17039000	17369000	16048000	17832000	16511000
1257000	1500500	1533500	1425300	1406100	1413400	1515100	1582000	1572800	1906200	1868600	2052000	1425800	1324200	1378900	1664100	1595900	1688400	1718000	1735400	1776900	1483400	1471200	1580500	1458400	1397300	1486200	1555300	1521000	1608400	958960	893450	1093200	1061500	1077800	1037000	825350	1187100	983320	1434000	1517800	1451000	1580000	1440500	1496100	1592200	1256900	1526000	1319300	1402800
0	0	50783	0	116830	66605	33667	165230	17821	109250	88754	79945	59599	0	0	0	136410	0	58272	184670	123080	29262	24575	100990	0	34346	48677	70852	92927	39294	15680	20391	94674	0	54423	35133	33144	95090	41220	45081	12384	0	8557.2	16742	0	0	41585	98173	6331.5	44870
3335500	3631700	3581400	3709100	3630700	3553200	3414600	3372800	3669600	3734700	3277200	3483300	3437800	3284400	3449300	3683700	3651800	3707400	3323400	3725800	3763700	3541900	3869900	3755700	3465300	3477800	3792500	3445400	3666400	3661800	3608400	3395600	3612800	3425400	3308400	3577400	3504800	3597400	3635300	3404100	3653100	3566500	3532800	3525500	3831800	3499700	3392400	3545100	3300600	3318800
1524100	1588800	1583900	1702000	1870500	1712100	1829200	1906400	1968300	1761900	1771100	1781800	1894900	1506500	1638400	2073200	2060900	1768600	1940900	1791100	2005000	1747000	1915100	1926500	1969600	1877700	1988600	1895900	1742700	1923700	1720100	1714700	1667700	1623000	1695400	1697400	1535500	1776600	1929000	1673900	1757900	1576500	1755700	1690800	1987400	1720500	1740100	1718100	1793800	1740800
320550	230780	338990	339210	237570	299020	322090	364320	330980	323030	372800	396350	350680	195310	364850	333770	297500	315310	342900	378000	318030	282280	304750	347820	338250	413780	345090	339770	316260	342650	387520	71676	362850	334660	350200	213490	254830	411920	401180	404340	347040	264950	332490	319150	466010	352250	339390	406480	376950	249950
10880	35126	0	0	0	0	0	0	0	0	0	0	0	0	0	16402	0	0	15059	73694	24360	187930	46424	52491	0	0	0	0	0	29444	0	0	0	0	0	0	0	0	0	0	0	0	0	10209	42545	14445	0	37583	0	0
1306100	2087300	1741500	1859200	2451400	2118300	1807300	2111500	2118800	1597500	2105300	1868300	1897700	1981400	1956700	1931700	1731700	1861300	2089800	1853700	1108900	1913700	1754500	1843500	1774000	1964700	1718200	1519800	1666000	1634700	2075400	1874800	2069500	1794300	1848900	2321500	1856400	1811100	1829400	1567700	1628500	1658000	2049700	2201300	2286400	2049600	1815700	1027700	1809900	1766300
0	0	0	0	0	0	0	0	0	0	0	0	0	0	0	0	0	0	0	0	0	0	0	0	0	0	0	0	0	0	0	0	0	0	0	0	0	0	0	0	0	0	0	0	0	0	0	0	0	0
4402000	4862900	4998700	4855000	4817500	4817500	5181700	5014100	5420000	5124100	4989900	5139800	5890900	5451300	5555400	5567500	5506200	5973000	5289500	5136200	5498300	5164100	5145200	5315400	5747200	5642500	5632600	5351700	5573800	5465500	5533100	5209200	5519900	5628900	5409300	5997500	5544200	5771600	5732200	5520900	5372800	5299000	6233600	5915400	5947600	5735400	5492100	5918900	5381900	5249100
515960	798180	515880	363320	357840	393860	572180	410300	369300	382840	390890	357890	395270	380820	345060	358820	159220	56692	771650	669820	473100	436480	303470	174460	320080	99864	175100	622270	385530	461640	516700	498240	467980	500760	611550	578250	171790	230210	381580	374730	374380	414190	391730	310350	240300	549380	388040	351100	578610	500700
789510	853790	889170	847730	805290	922270	1317700	1349000	1246800	1166000	1217200	1155100	1054100	1125300	1143000	1169300	1138600	1092600	940020	938140	1026600	984790	1058100	1004100	936070	1063600	1042400	1004300	964980	966930	1062700	982000	1100200	1008000	934280	999240	929840	881880	1033700	1112300	1063400	1040300	1053200	1018100	986970	853490	763960	829870	973160	939830
130220	211130	212480	203830	188900	146090	186760	263350	145910	159170	287550	236060	148920	203470	156640	128160	212140	134080	193300	185780	201490	186640	148080	255000	265050	100440	196940	181620	48652	174400	164920	176450	244690	224420	232710	246910	235880	246040	152110	147830	134500	196670	179470	224920	205970	237410	197170	162990	233050	151990
329740	358670	441740	221770	375040	372480	368160	290150	333450	344510	390600	338870	414820	384520	348240	400080	383980	370530	282360	372540	377230	340970	356330	351050	379550	399270	405980	346590	353230	393600	355240	376990	397580	284190	271530	297860	379230	387130	387960	360700	337400	379450	408370	331670	351380	354900	251710	402820	336690	333820
0	0	0	0	0	0	0	0	0	0	0	0	0	0	0	0	0	0	0	0	0	0	0	0	0	0	0	0	0	0	0	0	0	0	0	0	0	0	0	0	0	0	0	0	0	0	0	0	0	0
127690	87692	167130	203890	117970	147910	144910	219950	194410	321020	389740	331630	233290	70243	210530	170930	239030	202360	156390	68722	63026	138250	132100	132790	78349	122900	176410	238350	34728	140860	135810	107230	123500	168630	97507	198410	121590	107370	106160	101070	69562	175010	211770	174930	263480	164410	121130	166890	201660	68661
2589200	3080400	2923200	3096800	2915400	3029500	3162700	2921400	2989000	3024100	2965900	3088700	3195400	2952400	3148400	3576100	3180300	3324400	3171400	3121900	3077400	2949300	2996300	2913000	3269600	3149600	3296600	3290700	3189900	3335000	3334200	3026400	3069000	3283700	3189500	3344700	3200800	3213200	3264000	3173500	3326800	3208000	3468300	3471100	3428200	3332000	3143700	3334900	3279000	3153600
0	0	0	0	0	47726	154260	29944	0	0	0	64090	15930	48860	60862	0	43972	28985	0	0	0	0	0	38384	0	57829	0	40786	34480	29161	40733	46683	62659	0	0	57153	0	0	0	0	21000	31662	0	61296	0	56941	56237	63510	31410	49876
25556000	28179000	27741000	30158000	27669000	28122000	25881000	27412000	27202000	26741000	26559000	27003000	30126000	28698000	28563000	30696000	28336000	30848000	28881000	29357000	28017000	27795000	27121000	26262000	30817000	30259000	30227000	31278000	28869000	28261000	31296000	28434000	32525000	31365000	31877000	33797000	30518000	30281000	30346000	30402000	29254000	28157000	29248000	31571000	30175000	30614000	29610000	27832000	29718000	27083000
1128100	1333600	1238200	1341200	1329700	1337600	1278300	1365100	1406100	1453400	1428400	1480000	1254600	1172000	1333500	1395900	1327200	1505100	1541900	1374900	1562300	1379700	1498500	1509100	1323500	1318200	1432100	1310100	1171700	1313500	1204400	1224900	1131700	1317000	1414000	1441500	1145600	1311800	1225900	1142500	1277200	1387500	1159300	1172800	1466800	1328100	1186900	1355400	1238300	1197400
0	0	0	0	0	0	0	0	0	0	0	0	0	0	0	0	441280	0	0	0	0	0	0	0	0	0	0	0	0	0	0	0	0	0	0	0	0	0	0	0	0	0	0	0	0	0	0	0	0	0
1032200	1189800	1120800	1159200	1203000	1221800	1186600	1256900	1187600	1104200	1124400	1135200	1370400	1409100	1204000	1233700	1243600	1339700	1306300	1215600	1344400	1225700	1311600	1250700	1261900	1335300	1184900	1162400	1126900	1217300	1255300	1055800	1256500	1085800	1124900	1366600	1247500	1146600	1174500	1170200	1263100	1241100	1372500	1234900	1333500	1181500	1160700	1177000	1136800	1230900
0	0	0	0	0	0	0	0	0	0	0	0	0	0	0	0	0	0	0	0	0	0	0	0	0	0	29365	0	0	0	0	0	0	0	0	0	47006	0	0	0	0	0	0	27179	0	0	0	0	0	0
743660	796120	887740	887500	798570	858550	938660	852710	911070	906710	832920	871560	898950	904320	908500	980840	817860	873900	832780	932950	1044600	950290	915130	1014800	905390	957120	902830	871210	839020	843200	823990	836550	873000	771380	783380	850610	901870	844920	879110	811870	860930	890900	916630	874600	931560	852830	811710	859190	865140	857270
5107500	5876700	6570600	6123200	5505600	6139300	6340800	6348900	6053700	6385300	6615700	6538300	6232100	6005400	6249300	5627500	5798300	6212800	6503000	6467700	6963500	6066600	6297400	6445100	6386200	6570800	6678900	5856900	5927700	5624300	6363400	6528900	6624500	6676700	5972700	6125600	6619500	5862300	6925900	6101800	6189100	6300100	6787700	6035900	6821500	6141900	5680800	6163700	6099500	6167400
4414100	5605400	5057100	4888800	3740700	4587600	4657600	3924800	6301100	4820800	4607600	4012300	6275700	5634700	6302900	4700300	6682500	6592200	6153600	5707900	8238500	7052000	7058200	6631400	6756700	5771000	6754300	6168200	5269800	5765200	5499300	3631500	5608700	5123900	4689000	5307000	5145000	4500600	6296600	5500200	5419600	5886900	5121700	5381000	6217900	5684600	4189700	4903000	5334200	3579100
3169900	3760200	3771900	5557200	5069700	5192300	4030000	4282400	3979100	4914000	4977900	5370400	4586600	4135100	4354400	5673900	6469600	6896500	5170400	4963100	5090000	4997300	4829400	5398200	4792500	4641800	5257400	6108100	5725500	5664400	4002400	3993100	4162100	4994100	4946400	5166600	4811800	4715200	5066900	5310600	5497900	5028300	5497800	4849300	4494200	5478900	5461100	5119500	4435900	4743600
0	0	0	0	0	0	0	0	0	0	0	0	0	0	0	0	0	0	0	0	0	0	0	0	0	0	0	0	0	0	0	0	0	0	0	0	0	0	0	0	0	0	0	0	0	0	0	0	0	0
328610	321260	375550	402170	409530	377830	327980	211780	295000	360600	333770	393380	374920	354920	356960	421920	366910	407980	392380	290830	257630	361090	375390	353390	286880	325520	330830	298390	344180	333770	309260	306940	374950	293800	287280	283200	333120	318570	346640	324590	357370	348350	314350	368710	377500	327560	325330	313300	238020	280710
7605900	9348400	8276400	8255500	8811200	7786500	8940500	9143300	9755800	9501900	8997300	10480000	8941900	7883500	9619000	12895000	12225000	13170000	8234000	8250300	9215900	8319600	9047400	9853500	10949000	10098000	10809000	8776900	9419900	8830700	10154000	9680900	10126000	9297500	8824800	11018000	7428200	8933000	8504200	9864200	10141000	9106800	10620000	12642000	11447000	9537600	11407000	10335000	8740600	8154600
0	0	0	0	0	0	0	0	0	0	0	0	0	0	0	0	0	0	0	0	0	0	0	0	0	0	0	0	0	0	0	0	0	0	0	0	0	0	0	0	0	0	0	0	0	0	0	0	0	0
5456100	5969500	5392700	6281900	5567000	5841100	5687700	6200800	5996300	5959100	6380400	6064000	5990700	5446300	5605700	5759900	5435500	5852200	6750800	6288000	5888400	5479700	5335500	5319800	6019800	5709000	5676100	6130500	5281700	6234800	6632400	6360400	6624200	6681900	7798300	5824200	6143000	6286100	6189400	6245600	6044200	5921900	6113300	5439100	6124700	6474700	6789100	7020400	6770700	6326400
394510	652460	522090	552050	589970	519740	495170	570470	609540	475890	501490	470530	597000	531460	513650	707440	546870	606580	374250	430580	448760	503220	578150	417820	563990	326980	577770	543340	435340	502080	507000	506180	518650	435920	454200	497200	269390	532960	595320	458640	486540	560330	472440	536600	498220	497820	523340	508190	515210	431820
2839400	2772300	2958100	3023600	2719900	2585700	2624300	2982000	2790600	2497700	3013000	2885100	2626800	2994500	2758100	2758000	2924300	3066600	2988000	3307400	2807800	3576900	2900600	3522900	3094200	2749800	3192700	2711700	2778300	2795900	2815700	3231900	3264400	3315000	2721700	3329200	2816500	2353100	2479000	2962800	2724100	2611200	3205800	3704500	3838000	2382500	3169400	3086500	2569400	2984300
938610	980720	1023300	1010500	973250	944030	1124600	1100200	1026300	860880	912800	980440	1053500	933620	1082100	1037000	1019200	1086000	1113700	1165400	1062000	994210	1029700	1044500	997770	969180	981920	1057400	1035000	1055000	1014700	951840	893650	891440	871210	740420	1077400	952530	1071700	1132800	1019400	1030800	987750	921010	919000	990040	821430	934290	997370	929460
0	0	0	0	0	0	0	0	0	0	0	0	0	0	0	0	0	0	0	0	0	0	0	0	0	0	0	0	0	0	0	0	0	0	0	0	0	0	0	0	0	0	0	0	0	0	0	0	0	0
411210	500340	479780	475050	511970	474390	462980	510530	503380	415220	452190	446890	505700	479820	493040	562920	548330	578700	514040	539850	557600	513440	594260	388560	571660	538320	575980	488560	494030	500130	322180	421370	527260	460640	503800	455870	497540	521120	537710	485220	492120	526930	481560	463180	513240	464850	446500	516820	398050	462850
5828.3	0	47648	28592	21581	0	0	0	0	0	0	105980	6973.5	0	0	26401	0	105670	0	0	0	0	33344	33991	21876	0	0	0	0	17568	0	0	0	0	0	0	0	0	0	42679	0	18304	0	0	0	0	24126	0	0	19895
1375300	1446500	1168000	1292000	1163700	1067100	1040400	1069000	841150	1203000	1070000	1208400	1271000	1447800	1480900	1524200	1000800	1465600	1078200	1273900	1284600	1272300	1237000	1312300	1499000	1193100	1816600	1436800	1196200	1494600	1101800	1096700	922680	833850	599410	965800	1068500	1157700	994970	1321900	1181800	1100300	1162300	1182900	1022300	1023100	914330	956400	1077100	1016800
0	0	0	0	55901	0	0	0	0	0	0	0	0	0	0	65913	0	0	43841	376800	0	0	88140	0	0	0	0	0	0	0	0	0	0	0	0	0	0	0	0	0	0	0	0	0	0	0	0	0	0	0
3558600	3725300	3920400	3924300	3818200	3736700	3684000	3771400	3794400	3393600	3465400	4088000	3672900	3674800	3639700	3753500	3624400	4028100	4026800	3868000	3857900	3441500	3757600	3778000	3567000	3763700	4068900	4048200	4046800	4091800	3801000	3830200	4074900	3665500	4025100	3967300	3803500	3927900	3949100	3754900	4023600	3758700	3981500	3642100	4097900	3883900	3843600	3787000	3668200	3500400
2128900	2431700	2544200	2427500	2432800	2465700	2357500	2503500	2501000	2450500	2453400	2457200	2606300	2398600	2455500	2745100	2678700	2650000	2671000	2355600	2668100	2453800	2345900	2638700	2549200	2429600	2336400	2401400	2498700	2537200	2345600	2308400	2188200	2267400	2129200	2303800	2451400	2573300	2474000	2376600	2491700	2496400	2563500	2515400	2510600	2342300	2278900	2339700	2282000	2439300
287890	311280	290710	371360	411820	421480	248100	212300	366420	352150	351490	256330	286370	310210	337150	381610	377050	410750	337460	338460	296520	346560	324630	323670	312110	265880	296370	317240	289460	295060	327750	241010	261520	277950	261830	280310	300880	354560	155080	312830	254010	322640	390210	311140	177360	213120	303600	354810	296770	275230
592250	1030300	827730	931390	921240	1063500	1334200	846820	1175400	1024400	840710	995650	950740	613660	961960	828770	753520	931580	1003500	810220	933570	921070	761820	806270	870140	858310	641440	661800	811340	1033600	792520	916230	824420	950530	420620	647160	471930	560550	286550	1007000	736980	944820	1344900	1080000	872640	769170	1041600	917640	1034000	1051500
577990	566120	611700	543630	481290	663350	665640	665880	664590	623870	546640	559340	608140	689020	718860	517600	613940	528880	566570	609910	687060	586460	610670	659150	602680	593820	502800	508230	533040	545310	658160	705050	638640	633430	638440	699120	544230	608000	560180	528330	570150	583790	795860	710940	743250	664740	703990	684890	593630	640120
2384000	2748600	2544400	2286700	2287200	1396900	3063600	2232300	2253900	2574100	3650600	2661400	3581200	2956600	2284600	972490	2388000	1756700	1074600	4765500	4427500	2747400	2734000	1292300	1951800	1200500	2064700	4220000	1025200	2325600	3122500	2823100	2072600	2050400	1678100	2148200	1841500	4153700	2645100	2303000	2522900	2566800	2080900	1861500	2129300	3148600	2636800	1929700	1666400	2336200
1098600	1156000	1196400	1057400	1131300	1166700	1303100	1260700	1186500	1226200	1235100	1317700	1182600	1212700	1215200	1053800	1015500	1112200	1274500	1411600	1327000	1231000	1267600	1291400	1178100	1040000	1328500	1103900	1147900	1074600	1232300	1194500	1301000	1155900	1132700	1200900	1131800	1232800	1193400	1210700	1197200	1212500	1087700	1150600	1126700	1180700	1088600	1182400	1112300	1169500
232960	169300	148380	49895	91210	150520	46039	187390	18943	93398	59397	127040	88860	76225	60963	84252	24912	217960	34581	223120	77431	84187	96731	65123	82164	35297	97006	57753	102950	43032	71075	273810	196080	104170	68483	71215	58002	132420	10110	253900	95444	190890	52776	128080	94148	112910	138640	83692	286860	220870
1704700	1957400	1851900	2090800	1880600	1877100	1933800	1803200	1871200	1957300	1782500	2040700	2059000	1948200	1874800	2159700	2046700	2222300	2030900	1670600	1755300	1860300	1900100	2130000	1981600	1919200	2040300	2048100	2004400	2017200	1938600	1924200	1988600	1783500	1712100	1693300	1995300	1965600	1960200	1931900	2057000	1828200	1828800	1765900	1921600	1890200	1697000	1903500	1960000	2028200
7146000	0	2849700	0	0	0	0	0	0	0	1230000	0	1460500	0	0	7691000	0	0	3040900	1202600	3068500	0	0	0	0	0	0	2772900	0	0	0	0	1612000	2704300	0	2917700	1651900	4480900	0	0	0	0	0	2422700	0	1156600	0	1407100	0	3172100
4251500	4309100	5523000	4973600	4361200	4543600	4049400	4434100	4136800	4386700	4300200	4922000	4690700	3675000	4096600	4082100	2908700	4236200	4909700	5482300	5627400	4535800	3589000	2723400	4984800	4416500	4172400	4395700	4433600	5173300	4146400	4193800	4570500	4676300	4904200	4767700	4665500	5049800	4510100	4373600	4548100	3944200	3882700	3992000	3598500	4452200	3882000	4267400	4336100	4636500
9689200	12095000	11984000	10881000	11491000	10421000	9556300	11483000	9100000	9734600	9250200	10088000	10777000	10651000	11322000	12657000	10054000	12465000	11612000	10906000	10470000	8829100	10232000	11658000	11034000	10634000	10556000	12697000	12175000	14060000	13247000	10899000	11615000	10016000	8707200	11641000	10347000	10592000	11958000	9953200	11446000	11579000	11116000	12235000	14172000	13930000	13231000	9683800	11652000	11752000
1523900	1734400	1561900	1822700	520510	1754400	1554800	1603400	1627900	1656600	1650600	1682500	1581000	1651500	1562100	1821900	1751500	1931900	1838000	1621600	1590400	1594400	1434400	1821500	1750300	1661200	1765700	1675000	1798100	1776000	1591600	1511000	1731700	1566200	1551400	1500800	1672400	1626500	1696200	1725000	1786700	1678900	1681300	1701100	1637300	1660500	1552100	1556000	1627100	1552300
491170	721410	567010	521090	475390	719550	726860	561080	376870	571870	634560	503580	823050	609540	662370	412770	683040	866730	539020	608460	471500	615690	750780	421690	692690	635940	755720	437490	684660	208250	545280	496660	383380	386670	484310	449930	740650	584150	629780	654380	470590	561410	715610	652480	742170	433050	384510	455490	451610	571460
557770	566050	437110	538840	645040	541950	398840	607640	351530	595050	484180	626310	575780	492150	546440	581780	448770	621430	404660	579740	546150	457440	500100	258640	640770	457430	672310	460950	576140	593990	611770	661890	590600	674700	701500	662690	533970	564670	500700	556440	605440	550490	699550	828550	635610	624750	544030	696600	558550	587450
310130	408140	432450	579520	566720	476250	523120	546890	506770	445450	441240	480890	595780	495870	530240	562640	559920	562690	522520	504500	635040	537670	543730	547480	429960	529790	493370	452650	560230	570840	432630	468370	533070	408360	289410	549540	551430	450810	483950	394910	576850	474660	377580	518420	575630	654740	543020	451150	455280	487290
621830	678340	648660	600630	660640	707050	484390	711960	657110	711970	518580	671700	622120	619270	653020	517110	654090	759830	697810	731100	763900	743030	846750	769270	686320	669690	631830	549640	599930	661890	672480	682930	623830	585010	611840	658710	636000	647170	636120	545590	693350	661030	571190	618590	672280	695390	567250	586280	613330	605830
2164300	2326600	2350800	2385300	2340800	2203800	2247300	2218700	2314600	2208200	2248600	2282800	2447700	2371700	2353900	2458100	2427000	2507000	2564100	2642200	2738300	2318800	2365300	2407400	2505600	2455800	2470900	2266700	2294700	2423500	2294900	2153700	2304500	2084200	2169700	2174400	2423300	2515200	2576800	2428500	2399700	2239900	2420400	2186900	2294000	2161600	2109400	2132300	2150600	2028800
640680	856140	714830	596240	716880	713480	724630	775430	706830	738890	630750	542520	784380	714810	879320	729650	701920	775810	756380	701880	959470	775620	623090	783630	870010	684930	842130	659760	694230	618730	724080	749770	794920	583800	640740	662040	738210	705870	784710	590130	730240	746430	711110	704040	735080	762390	683150	789720	750810	689930
1572800	1723800	1890900	1728300	1629700	1738900	1809400	1738600	1933800	1766000	1924300	1866100	2085600	2065200	1916400	1747500	1841300	1855900	1958000	1943200	2007100	1698600	1781300	1835300	2107600	2014600	2206700	1815200	1729500	1852900	1909800	1765700	1917100	1808300	1860900	1961800	2035200	1971800	2196900	2072600	1957700	1815500	2180700	2136700	2241900	2053100	2002900	2075500	1899000	1869600
14630000	15303000	16323000	15753000	15947000	16446000	15556000	15925000	15161000	15886000	16375000	16818000	17083000	16723000	16160000	15819000	13803000	14805000	15574000	15791000	15783000	14364000	14622000	14315000	15943000	15432000	15307000	16296000	17171000	17835000	17748000	17144000	16831000	16180000	18420000	17616000	16834000	18192000	17745000	15589000	16702000	17173000	18545000	17631000	18589000	18143000	17006000	18006000	16364000	16589000
1519000	1508700	1468700	1403200	1291800	1313700	1195400	1181000	1168500	1299000	1235400	1356400	1415000	1405400	1509500	1328800	1154800	1449200	1346700	1399700	1285700	1308300	1258400	1369200	1461700	1202800	1481000	1327800	1539900	1540400	1323400	1343700	1431100	1501700	1459600	1455000	1418800	1472800	1406300	1339100	1461900	1368700	1405700	1294100	1394500	1345800	1307700	1258100	1235700	1274000
181710	106860	236280	245680	72881	186250	272450	217610	271090	248680	253570	228640	153840	257650	197730	307160	187670	276290	275760	199850	353620	269880	120040	248660	230790	219790	270680	187800	210930	234490	87519	145470	168870	151880	210290	244460	217520	242040	250530	212300	315610	218060	67829	193960	260150	226210	223740	255500	128900	172260
5840300	6369700	7021200	6820300	6715200	7004000	6672600	6741400	6578900	6608100	7052100	7451300	7179500	6748000	6734400	7673200	7441400	8321900	6718400	6692800	6288900	7061000	7193200	7486100	7149900	7182300	7346600	6927400	7027200	7364500	6970300	6640300	6678700	6669400	6681700	6522100	7044800	7142800	7300500	7180700	7110700	7044100	6972500	6898600	7264100	6597900	6548700	6525700	6175900	6901700
2105700	2307700	2321600	2331800	2315100	2334400	2426300	2225100	2403100	2483700	2446000	2217200	2559100	2476800	2400000	2494300	2417300	2585300	2489600	2414400	2051200	2277300	2504300	2477000	2568400	2215300	2641100	2303700	2395200	2371900	2465700	2342700	2483800	2420400	2437800	2581600	2558400	2855200	2623000	2521500	2441100	2574300	2536200	2597900	2625000	2723100	2451600	2460700	2382300	2435900
8115500	6673700	8686100	7463700	7722300	7707100	7221100	7434600	7465300	7249200	7769500	7501700	8629800	8973700	8511700	9430600	9287300	9472300	9092300	8304500	10621000	7706000	8065000	9299200	7661400	8293500	8586000	6656500	7985100	8540900	7732900	7592800	8344100	8275400	9003900	8941700	7665700	8340800	8320600	8497400	9513500	8195100	9179700	8192200	8026600	8881000	8257600	9103000	8392000	8362100
10138000	10618000	10585000	11121000	11188000	11108000	8828600	9367600	10423000	9337900	10136000	11001000	10728000	9430000	10680000	12308000	11993000	12558000	12810000	12634000	13284000	11324000	11115000	11797000	11191000	10518000	11212000	10666000	10805000	11657000	11511000	10079000	10625000	10604000	9613500	11959000	10637000	10129000	10477000	11446000	11637000	10400000	12220000	10777000	11292000	10471000	10598000	10291000	10347000	11057000
11145000	14307000	18228000	16222000	15645000	16334000	14369000	15453000	14080000	15607000	14825000	17545000	14750000	16950000	15699000	15492000	15807000	15866000	18407000	16988000	22682000	17367000	16224000	19047000	20213000	20715000	16752000	15312000	14772000	16344000	18559000	17793000	17044000	11281000	16928000	14694000	14254000	14920000	16899000	18282000	17353000	14557000	16517000	14676000	15779000	15612000	14982000	15920000	15593000	15546000
5358800	6065100	5615700	5246600	4027700	6219400	6041300	4274900	5515400	7218800	4446800	3697800	5406900	5625000	6012400	3225800	5032400	3533500	6236100	5862300	6182200	7830100	5955400	7141900	5897500	4719400	5493700	4225200	4955700	4875900	3195700	4704500	3757100	3641300	2139200	3909900	6133200	5426400	4583200	5339200	4839800	3754100	4495600	3920100	5192900	3772000	4142500	3571400	3581800	3230500
0	0	0	0	0	0	0	0	0	0	0	0	0	0	0	0	0	0	0	0	0	0	0	0	0	0	0	0	0	0	0	0	0	0	0	0	0	0	0	0	0	0	0	0	0	0	0	0	0	0
10721	0	45049	0	102980	63009	62870	0	0	0	104930	40162	26720	0	0	0	19073	0	74579	61894	0	93073	37884	0	0	36149	80960	37243	35919	50902	0	34852	48346	0	42455	95381	0	0	0	8450.8	0	49049	0	11348	0	64583	0	0	49342	38965
441590	652860	565570	421410	391710	428700	1053800	603810	547500	497580	641440	455930	416370	477830	603530	355860	141910	290640	767970	647380	548540	410870	722900	377160	447080	474370	514020	549500	593930	472250	553730	832890	444600	760640	556270	1167500	439350	777360	510210	552850	546720	242270	769880	298660	485600	772480	459300	774120	601770	837460
2405700	2673200	2604300	2485400	2688000	2751300	2596500	2636100	2744200	2612700	2650200	2821600	2878300	2710200	2653400	2821700	2994400	2815700	2993800	2757100	2846200	2513700	2718300	2737500	2849500	2728600	2939300	2804800	2818300	2775200	2559300	2451300	2767500	2525400	2470400	2483900	2828600	2892600	2910800	2718900	2869900	2540300	2781500	2723000	2921700	2566300	2598700	2761800	2549000	2579900
807440	771140	852430	1434400	1732300	1053200	1912700	1990000	2600500	2113200	972510	1014600	1482500	1199700	1278200	1889000	2559300	2340400	1020500	1850700	1486500	957460	1517200	2168700	1871300	1784200	2669900	2312000	733620	1885700	1042300	1220800	774230	2374400	1590500	2266900	1936500	591300	1318900	535610	1932100	763670	2651600	1186800	2677500	2333800	1863500	543100	452340	2230700
508130	341240	167600	354400	392130	102110	296750	277490	91748	174610	102160	210380	126030	41162	0	96937	82821	0	630800	544070	342960	106950	0	0	203550	0	51350	356230	278490	257950	216180	156910	97412	409370	167110	130080	121990	74690	40152	111880	124540	32098	24391	133140	40204	329030	129530	126100	113720	407150
130540	190380	167990	162650	132650	188900	167750	156820	90872	159010	189420	133160	249470	217470	218210	224070	259200	202620	195550	141290	164520	168090	181680	188110	201710	167940	192450	208330	190520	201680	189240	202090	188130	157920	156670	162050	166890	152680	200680	220960	205460	213210	211250	109190	235770	41217	222230	214980	164480	192450
0	0	0	0	0	0	0	0	0	0	0	0	0	0	0	0	0	0	0	0	0	0	0	0	0	0	0	0	0	0	0	0	0	0	0	0	0	0	0	0	0	0	0	0	0	0	0	0	0	0
1503600	1685100	1678000	1821100	1777300	1659100	1738900	1693400	1755600	1758100	1761500	1867100	2165000	1881500	1961400	2011700	1947400	1914000	1942400	1742100	1670300	1674300	1638700	1713700	1937600	1822100	1951500	1842700	1844500	1898400	1904700	1816300	1751100	1827600	1947300	1904900	1933000	2028800	2122800	2003700	2074900	1869800	2040100	1963900	2015800	2099200	2004300	2022600	1908800	1967600
336590	374010	397550	411830	412070	390630	414810	388020	368870	354560	408770	386530	395030	385530	313870	367860	388420	245920	360340	377870	288720	398310	310140	380550	384110	333440	385580	415010	418800	390520	406310	385190	435460	349320	397120	382330	401040	394560	359400	382520	360350	209540	282130	237850	253030	285280	266650	265650	392920	312260
1917500	1981100	1895700	2079800	2178300	2266300	1867000	1935000	2150100	2072700	2049700	1978300	2135600	1969800	2010800	2270800	2303400	2457600	2056400	2287200	2311800	2331800	2227400	2091500	2071500	1763900	2363800	2004700	2306300	2002500	2113400	2004900	2136400	2083800	2108900	2335500	2157300	2118200	2185300	1994600	1960700	2294900	1940300	2005000	2099800	1972400	1970600	2277700	2319600	1807200
277880	188640	277530	279900	254000	171930	210140	221340	243380	332470	189730	309330	229500	149250	260520	317380	355450	361990	0	277840	258600	207460	248440	260330	184340	256200	231700	193210	277560	292380	192600	242870	263660	173130	192080	237520	158910	105930	100050	224600	371960	0	221920	20914	194490	219770	233580	154610	60743	141570
495830	597020	567000	500980	500070	386860	508340	550590	604760	603160	551690	577910	360810	371780	522930	364460	427780	303300	448200	649200	570700	434780	250260	366170	562290	435880	368380	293640	487760	493450	465890	469090	604580	437510	513980	525790	583970	430560	615480	638170	435490	540040	457970	483110	485130	455170	274480	262230	470580	450320
179610	95602	223920	189180	172910	186830	253120	242680	231400	209410	174200	157100	233600	221160	208560	215780	142550	200210	217070	221890	255020	244960	193080	229270	210450	244030	144680	154080	112160	176050	236400	276780	227540	226980	194770	157090	228120	144440	234600	161460	218590	209270	227820	198540	239020	155220	190200	217340	237890	200190
9730700	10837000	11045000	10367000	9886800	10628000	10521000	10407000	10628000	10909000	10490000	11515000	11756000	11293000	11481000	11483000	10817000	10748000	11120000	11238000	12098000	11170000	11660000	12260000	11357000	11496000	11976000	10549000	10573000	10877000	11226000	10575000	11296000	10674000	11223000	11655000	11261000	11061000	11431000	11061000	11281000	10844000	11853000	11180000	11946000	10839000	10542000	11022000	10470000	10702000
46430000	54014000	52517000	57284000	55222000	53095000	55309000	56566000	54987000	54700000	51672000	55394000	60956000	57531000	58666000	55714000	54347000	54318000	57720000	54965000	53983000	54043000	52393000	56361000	56667000	55104000	60571000	57415000	56912000	58660000	61583000	58937000	60325000	62302000	62659000	63014000	57490000	58650000	59222000	57572000	56684000	55093000	66255000	64393000	66170000	67201000	63154000	67419000	60365000	57112000
3233100	3449700	3997900	3828900	3473500	3796000	3279400	3363600	3516000	3692600	3476700	3752300	3645200	3656700	3510800	4146600	4049800	4376500	3937800	3993700	4322300	4034500	3414500	3342200	3651200	3663400	3422700	3682100	3754400	4111000	3352700	3487800	3836600	3011500	3247400	3581700	3685200	3628700	3826700	3803700	3494800	2095500	3784400	3136400	3031800	3545000	3229300	3539500	3516500	3217500
56862	74213	0	108120	94734	205310	0	0	0	36681	87040	0	0	60080	0	90395	0	0	0	37572	0	100680	0	86606	98265	0	64500	149000	91928	29032	0	0	0	0	0	0	0	145990	0	0	0	0	0	0	0	0	0	30453	0	20675
155840	190020	217880	197230	226280	201690	250440	253630	204300	244950	169770	236870	208290	208210	185390	237850	229630	144710	902810	225620	310220	140340	152560	201130	216840	185950	203030	167990	45631	243940	227060	214030	257320	221490	170890	192510	193570	233350	268340	185840	243770	163350	255590	260920	260200	238200	276210	232750	200850	255510
0	0	0	0	0	0	0	0	0	0	0	0	0	0	0	0	0	0	0	0	0	0	0	0	0	0	0	0	0	0	0	0	0	0	0	0	0	0	0	0	0	0	0	0	0	0	0	0	0	0
1138000	1133000	1175000	1066200	1068600	1085300	1243500	1112500	1137900	1066400	1119900	1089900	1121400	1103200	1162200	1114400	1027200	1115700	1074400	1030600	1150600	1240400	1136500	1085300	1162400	1090400	1069300	1236100	1127800	1073300	1105700	1019300	1154900	1057000	952330	1091200	1111500	985620	1158400	990530	1058800	1075000	1017800	960560	932440	970080	1111900	1047900	1033000	987190
508630	577250	601030	593060	610480	673780	600270	594990	597880	592610	644030	649510	512490	570680	596770	631950	627600	677890	616060	652660	677020	606830	637300	650370	564090	596330	716860	629530	637660	635220	604900	622670	548590	595460	557020	497800	618800	594850	715300	493780	600420	627220	524990	610860	665520	608110	609300	593570	593750	546360
8001600	7801500	8510000	9331900	8482900	10226000	9151300	8198100	8983800	8758600	8270400	10105000	8975100	8318500	9171100	9014600	8728600	7476200	9786600	9498000	10589000	9771400	8027800	9530500	9294800	7839600	8902300	9313700	9501700	7464000	10312000	8840800	9558000	10165000	8957100	8887000	9384700	9148500	9477000	9069600	8404700	8590500	10269000	10323000	10437000	8632000	8002600	9223100	8757000	9733200
16456000	18323000	18588000	18647000	18195000	18282000	16884000	16100000	17145000	17688000	18141000	18172000	19485000	18319000	18724000	20644000	19436000	19579000	18426000	16861000	18753000	15974000	15583000	16591000	18135000	17668000	18334000	19533000	19533000	21370000	18724000	18211000	18809000	18407000	18313000	19543000	18671000	18741000	18998000	18506000	18695000	16717000	18836000	18945000	20008000	19298000	18666000	19022000	18214000	17313000
1178700	1326500	1373300	1470600	1271900	1328600	1043500	1101100	1166500	1039500	766280	1308700	723850	1051600	1012100	1140800	602260	1161100	669380	769620	1626900	575160	1407200	1533100	1108400	1177100	1150400	1085500	751980	1100800	761320	390960	631850	656470	562780	709810	845760	984880	1230500	951520	907740	978930	764950	759320	761840	393910	530900	749730	836740	391900
643290	909030	595860	1087500	1021700	947170	767710	808340	636760	426340	831660	554080	592280	705380	146930	706240	744050	364010	868410	1301400	1115700	724970	719580	243330	229760	234040	226040	825020	730730	930940	1163800	1235200	1200600	1142400	1298400	1098500	861500	445040	833720	1013500	366310	330310	904430	968290	767390	615500	1174100	691740	1210300	893310
941330	1022700	1143300	928120	916330	1058400	1056500	754070	1008800	1031900	1117700	982390	1066500	1038800	990280	1072900	1066900	1182000	535990	1102400	1061500	1087800	1151700	1201800	1147800	1081300	952270	841230	1028700	1042400	828180	809610	1019900	875010	679140	894510	980680	1002500	1162000	1040600	956190	1121400	862670	925460	951660	1005900	943690	1029300	901960	934370
364520	473790	438660	464340	341870	368300	468170	393320	432940	430570	419100	469340	462720	435140	448790	454290	435460	404140	463600	389290	545090	467570	458170	427270	437840	377490	464980	463980	431150	484220	461070	412670	442010	429080	379020	402150	498790	475990	500760	463970	454800	443990	474780	415500	499410	463340	412670	447600	456610	434100
0	0	0	0	0	0	0	0	0	0	0	0	0	0	0	0	0	0	0	0	0	0	0	0	0	0	0	0	0	0	0	0	0	0	0	0	0	0	0	0	0	0	0	0	0	0	0	0	0	30080
0	51881	0	0	9672.6	0	0	0	0	0	0	0	0	0	0	0	15539	0	0	0	0	51521	0	0	7373	0	139800	0	0	22279	0	0	0	6599.5	213540	0	12812	0	0	0	0	0	0	7968.4	24987	0	12557	0	0	0
0	0	0	0	0	0	0	0	0	0	0	0	0	0	0	0	0	0	0	0	0	0	0	0	0	0	0	0	0	0	0	0	0	0	0	0	0	0	0	0	0	0	0	0	0	0	0	0	0	0
1289400	1375800	1441200	1478600	1418300	1346900	1446600	1522300	1316600	1457700	1327400	1397300	1463700	1349800	1391500	1470500	1114400	1458200	1431500	1412200	1557800	1337300	1439500	1495600	1496500	1322400	1522900	1483000	1354800	1411600	1541500	1382000	1483400	1362500	1316300	1373300	1373100	1343700	1506000	1556300	1456800	1455000	1527000	1384000	1595000	1406900	1466700	1460700	1449100	1358500
84835	147760	129130	151880	140870	89834	84462	144490	115830	149150	119910	130960	115740	144920	98734	139920	107340	151850	124790	85673	84945	90174	71048	104880	109330	102110	171800	122860	109070	132110	130950	61607	105330	108180	90473	98576	80538	93463	117010	141380	112830	107660	40541	112570	99016	132720	109550	94723	78326	111880
80925	170810	73380	137120	171170	133240	86649	187560	130040	35408	149780	92639	40811	121960	61867	86351	200450	61559	195170	140730	155140	172410	89746	155370	83193	79131	106990	149670	57107	83243	84071	132230	34771	127040	58978	150730	146650	123000	147200	15458	86414	105980	84636	35384	124110	37469	149460	169080	54967	50978
112210	224090	265080	142060	278060	186330	153730	66498	151360	208960	283430	90457	172130	286380	253840	379810	322770	83878	148790	145440	118200	303280	161790	274480	230400	193100	203680	96711	204990	102330	115140	299300	195050	296260	38404	184040	164240	188830	133170	294170	180320	173600	301120	326580	363830	163650	213720	247270	195460	286070
0	0	0	0	0	0	0	0	22766	0	0	0	0	0	0	0	0	0	0	0	51084	0	0	0	0	0	0	0	0	0	0	0	0	0	0	0	0	0	0	0	0	0	0	0	0	0	0	0	0	0
1789700	1928300	1998800	2031900	1846100	2167700	1719600	1794900	1798600	1867900	1975200	1847900	1952200	2004900	1903400	2092500	2127300	2123100	2070200	2184100	1896100	1998000	2032400	2221300	1951900	2070700	2100800	2121900	2064900	1955200	1865500	1746600	2000600	1942900	1850400	1965800	1914900	1993000	2078300	2125300	1929800	1903500	2160100	1909100	2031600	1958700	1973700	2014100	1816800	1774000
2542100	2850000	2375900	2617800	2789000	2695000	2410300	2748000	2868500	2582300	2760100	2906500	2986000	2683200	2747000	3043200	2986600	3262000	2158400	2551400	2616200	2509800	3041200	2519800	2951000	3100100	2775100	2739900	2808000	2886400	2705300	2438400	2953400	2695300	2543300	2845300	2699800	2704000	2886900	2957800	2706800	2625600	3022400	2789600	2818500	2438800	2425800	2471000	2486200	2488400
253830	265650	269750	284580	194100	129890	246770	207510	277580	218530	212390	140950	298780	242370	229720	251920	215160	272710	242290	188320	312970	271890	272550	356620	246070	227990	273270	315790	238190	196130	226510	207590	296230	233510	224270	196630	179140	198140	222720	185520	206760	223060	262270	242450	195620	160810	254940	202830	145050	271190
345770	418900	273440	452650	342530	324140	334850	354640	388420	406250	418740	369190	340100	317890	339270	427820	395890	388940	411570	419990	487610	389790	375050	364880	388640	229360	392340	298440	358250	361490	380440	331640	307110	341650	409840	343620	340110	363970	406680	274280	412410	246740	294200	343470	382460	338220	333580	354520	313910	332200
120100	155300	129110	263650	204160	159250	127630	167660	92775	209680	52407	294520	137210	121930	144520	266550	216600	229740	166520	151520	299160	341050	101450	209410	23931	145020	138800	243740	195530	161870	47104	96542	61316	144400	113950	104330	48772	117780	174960	119850	173150	145420	283040	127480	141690	174000	209180	199410	110620	158440
0	586640	692750	381360	703300	175320	486970	645100	423450	320440	362390	0	372650	339460	196800	424090	388310	417260	233370	359500	470220	316530	0	0	130650	498630	0	0	221150	127750	504930	159710	0	483420	365480	256820	0	0	0	262660	318870	427270	478960	162150	0	101370	0	358760	366500	0
673210	725370	767260	687970	724870	833370	672400	660160	631560	661400	665330	656810	843950	812470	871100	824520	889270	792500	625100	509650	722560	729350	758790	745260	821020	808960	825340	792850	789080	775920	744140	721170	735320	675770	563270	487710	736890	777480	794310	755540	727370	756140	611720	635130	679220	649660	614620	605200	661940	686070
9781700	9766000	11163000	10929000	11153000	11974000	11444000	10686000	9797700	11211000	11523000	11598000	11107000	10919000	11020000	10562000	10294000	10614000	9788500	9717600	9648800	10206000	10311000	10236000	10956000	11057000	11222000	11751000	12116000	11992000	12876000	12043000	12541000	11554000	11639000	12021000	11497000	11523000	12513000	10244000	10418000	10732000	13252000	12367000	13524000	12787000	11747000	12711000	11393000	11369000
2380500	2616600	2762600	2800700	2738700	2771200	2736300	2678700	2702000	2502900	2758100	2759100	2911600	2855100	2782900	2715400	2551100	2669600	2628700	2546700	2905000	2508300	2531900	2342400	2900600	2549600	2864500	2688400	2771600	2886800	2577700	2616200	2721200	2711600	2589300	2645600	2978300	2763700	3039900	2868300	2853200	2850700	2789600	2740300	2970900	2822500	2657900	2711900	2762300	2715300
6360200	7241100	7420400	7473200	7719100	7448500	7544400	7386700	7437500	7773700	7449900	7297400	7607500	7454200	7803800	8648900	8258000	8889800	7356900	7307900	7684800	7735300	7968600	7672300	8220600	7794700	8360800	7929600	7836600	8101900	7645900	7455800	7660900	7091000	7693400	7869200	7850800	7765000	8002200	8097300	7696900	7826000	8231400	7970600	8247200	8533100	7766500	8028700	7717300	7750700
48961000	60780000	57266000	54507000	55462000	53684000	57684000	58989000	59267000	55425000	55918000	58301000	67005000	61621000	64924000	54882000	54284000	56820000	53436000	57568000	57216000	55501000	53076000	55546000	62560000	57799000	63089000	59471000	57867000	56978000	67291000	61890000	68990000	61795000	65630000	66217000	65334000	63093000	64220000	58961000	59744000	58710000	69964000	64675000	67000000	65049000	64927000	66459000	64199000	63540000
3364900	3923400	5202400	5754100	3959000	5602800	4811000	1897200	5483600	4298700	6616300	7892500	3700800	1479500	4658400	3760700	4037200	3352800	4316500	3095400	3693100	3521800	3723100	3998300	4394200	5615900	3294000	3521100	4750000	3450200	3041700	7689800	7468000	6061400	3885300	7260100	4528300	4126500	5761100	1272400	6436900	6909600	2956100	1577100	1691400	5745100	5980200	6387900	5210400	6261700
30844	23953	0	31686	45361	0	12314	0	0	0	0	0	37015	16820	0	0	0	0	0	0	0	0	25069	12868	0	0	0	0	15973	0	31136	0	0	24302	17003	0	0	28897	0	0	0	0	0	0	0	0	0	0	0	0
772360	6931200	6524400	5502700	6847600	7179400	6091600	6070300	6287300	7157900	6595800	7388900	8598400	7504500	7969700	8551200	7406800	7891300	4792800	7072200	4948300	7812300	7919200	8557800	8665800	8379200	8014300	8400100	8334000	7493600	8235700	7164500	7605300	7443900	7619800	7954900	6890000	6871500	7362900	6612200	6396400	6307200	8128400	7317400	8209300	7674500	7651900	8403900	7288000	6705400
790990	401190	696260	0	693130	689860	1078200	1067100	1071700	850970	856170	662200	956060	501820	759820	1049500	1015500	1052900	896720	750270	718480	881000	852170	964370	1014100	891520	867570	907640	895650	914740	559700	666440	746940	483560	743370	683730	536690	769340	867360	776720	687160	770440	558010	392450	787870	513250	654170	612820	782210	690910
1129400	1069800	1197900	853350	917650	854700	1006200	995370	1254300	886460	573270	940980	1084800	1303700	971200	1053200	833570	1060400	1127200	873320	1140000	1110900	996940	1356100	1039900	1134100	843080	1041500	1025000	760630	908480	736520	816890	722560	734340	635180	980190	854020	864280	778770	763660	625150	876390	509070	853360	710020	781320	813270	832190	618640
0	0	0	611240	645210	0	297460	277850	592190	746110	667330	549680	533160	2958000	435390	253870	336180	275670	634770	220690	0	0	118660	0	3120700	3577800	0	0	761670	172260	2877700	0	3387400	3024500	2891200	3103200	0	951050	1960800	0	806040	0	3260300	3125800	178500	0	590110	2343500	2788700	475160
599130	833540	805290	741840	688440	752440	714130	734590	627830	673460	662200	791080	752460	801510	786420	620500	732510	770330	707980	794080	763800	722840	791510	757160	791850	784140	797390	722670	749150	761670	644030	680760	608310	682530	703020	727670	704020	592140	659530	709850	619000	633000	588520	696970	608630	671150	813710	652920	683510	743090
2628000	3007400	2889800	2999100	2955700	2938000	2760300	2885800	2866500	3026300	3080400	2827200	3068600	3097200	3003000	3043100	2911700	3100600	2900600	3103100	2982800	2877900	2806300	2868200	2753000	2941000	3142600	3004500	2898800	2934700	2911800	2822600	2909900	2920600	2937100	3298900	3138000	3138100	3224600	3071700	3154400	2968400	3129700	3170300	3100500	3056500	2875700	3022700	2971500	2932800
237280	301250	549230	290220	303100	271120	314590	296010	331260	192910	302850	405550	328160	181130	317050	330540	278730	296850	395050	350150	475830	253400	309910	258660	349520	237760	344750	369670	339290	352630	312610	191330	334070	343480	499870	364700	313150	343590	368270	350680	402470	331980	335970	350990	379330	213460	337310	409280	307500	307600
2585000	2796400	2675200	2663200	2663600	2933400	2937800	2737800	3053100	2928300	3114300	3160700	3121400	3028100	2991200	2989200	3239700	3077900	3030100	3208500	2924900	2846300	2873200	2896900	2771900	3069800	3163200	2805200	2834600	2876400	2638800	2560800	2726400	2545700	2350700	2005300	3227600	2957300	3167500	3200100	3141800	3102200	2940500	2858500	3357000	2849400	2892400	2951600	2826900	2613200
277690	120560	414000	425350	174040	331280	129820	219080	418040	480740	303630	475060	474750	257800	0	467950	343060	223910	213740	84698	224180	215710	61371	237050	351270	184600	136100	426790	353760	345140	483780	98730	472360	421860	401010	384670	185060	323190	318360	421620	387080	271710	74264	418920	369540	353310	266860	291540	657660	406490
692030	639690	842280	801480	755220	764680	662050	837580	836830	770710	796490	635330	809870	752280	814820	968050	741060	818180	907170	796220	785470	683190	800550	752430	812820	723290	596300	880350	881830	763980	737390	629330	899690	697400	777670	927950	857080	845220	717100	854740	698320	813000	844100	817430	685020	845890	808570	792400	860000	734240
1112600	1110800	1062400	1137400	1042000	1219400	1110400	995390	1062400	1073300	1141800	1028800	1233700	1107500	1280600	1199100	1176900	1250300	1123100	1061300	1265000	1067400	1133200	1189400	1178900	1235200	1219000	1190700	1138700	1079100	1101600	1062100	1105400	1009400	952800	889340	1203100	1116100	1306100	1242600	1142000	1194100	1156300	1050500	972270	1023700	1070000	1045600	1115100	1011100
24626000	26188000	27385000	25516000	25379000	25654000	29005000	28703000	28608000	26313000	26719000	27426000	30958000	30181000	27857000	25262000	24539000	25725000	27218000	24945000	27237000	24447000	26079000	25618000	27245000	28343000	28062000	28753000	27707000	28249000	31847000	29916000	30417000	30105000	30341000	32722000	29788000	29529000	31016000	29257000	27902000	28173000	31311000	32452000	30654000	32714000	33753000	31055000	30164000	30014000
1664700	1772900	1899100	1509800	1691800	1788800	1115500	1217100	1563900	1340000	1340900	1222300	1737300	1878500	1866000	1314600	1272300	1624500	1387500	1312000	1472000	951570	1440800	1377100	1848400	1541600	1828900	1861000	1967000	1930400	1318500	1546300	1620100	1396200	1830300	2257600	1452100	1624600	1766400	1326000	1073500	1367000	1900800	1626400	1681300	1769100	1562400	1498500	1230800	1379100
24796	15072	58648	22314	0	55135	99909	78228	108850	89390	35986	108420	91075	53028	0	162150	117130	140410	48412	75499	14534	101360	100810	66909	0	51271	51958	30035	108520	54871	91040	0	94770	76328	12799	0	52122	77766	7458.5	0	0	63184	75802	86144	0	81657	58682	78282	47749	86999
43412000	48654000	49835000	49954000	49941000	47820000	49764000	50550000	51071000	51394000	49168000	52626000	55250000	50386000	53876000	54838000	52821000	54709000	54347000	52064000	51048000	51872000	50028000	53217000	56199000	53324000	57288000	52753000	50512000	54311000	54034000	52654000	53789000	53582000	55597000	53460000	53367000	52577000	56928000	54142000	52960000	50392000	59866000	58638000	61889000	55964000	53295000	55862000	52531000	52608000
461000	482500	567790	547510	529940	461920	477220	405830	400570	493750	472950	545550	498210	382940	475940	500140	490190	526580	400290	365000	479450	486680	458620	527190	441220	417970	492840	462080	495760	498460	499220	459340	421880	451980	490210	487910	273750	387580	511640	393620	454950	428800	556130	417010	529810	521230	458450	533410	470820	469590
1983000	2132300	2452700	2195700	2198300	2387900	2130600	2205400	2229400	2113300	2223200	2272700	2507000	2540300	2454900	2641400	2587800	2475000	2309400	2239000	2094900	2381300	2065800	2394300	2627600	2572200	2480000	2422400	2415800	2351600	2253600	2152200	2389400	2369200	1965400	2154200	2513900	2433900	2576700	2506600	2305800	2410400	2284800	2162900	2261100	2235100	2186800	2161200	2221000	2216200
5308800	5677200	6139000	5783900	5830800	5729400	5917600	5592300	6081500	5647700	5903900	6031300	6304900	6241100	6088700	6363600	6483000	6280000	6500500	5517800	6047700	5863400	5813600	5624000	5988900	6142000	6419500	6621800	6266700	6172100	6045000	5987000	6128600	5790600	5685100	5796400	6889400	6364800	6841200	6344500	6031800	5966900	6411100	6119800	6516500	6062300	5357800	6046800	5810700	5800800
20234000	22461000	22582000	21639000	21415000	22104000	20693000	20021000	20301000	22595000	23220000	22980000	24553000	23697000	23713000	24654000	24528000	25363000	22228000	20393000	22298000	21830000	22207000	23121000	24114000	23390000	24811000	22035000	21221000	20973000	23717000	22975000	24308000	22723000	23597000	23342000	21676000	21509000	22487000	22088000	22051000	20544000	27458000	25687000	27842000	22018000	21335000	21575000	21093000	19603000
2621400	2442600	2704200	2849100	2796700	2750600	2393500	2380600	2720000	2689000	2648500	2729000	2841300	2685100	2663600	2783100	2703000	2818700	2839800	2821400	2784700	2437000	2292800	2325800	2800800	2642200	2797500	2808600	2675200	2918100	2673900	2642300	2796700	2604100	2489400	2685700	2827700	2864200	2759700	2704500	2796400	2745500	2744500	2322000	2571300	2596500	2558800	2626900	2685100	2609400
479000	513200	505470	543150	477000	522130	551330	600750	552710	608310	544130	555770	605490	530000	581340	587400	444570	520510	518170	499980	520150	504220	533090	519580	582570	576750	585640	417180	509700	459310	505660	537690	517900	491570	475330	518930	507680	550820	491280	472180	352040	512890	534200	542230	587850	512070	497520	490910	569460	538580
57677	0	0	0	0	0	92161	64355	0	38423	0	36363	36821	49991	0	0	45727	0	99418	123430	23319	0	31019	0	38881	0	0	0	0	54135	109350	54738	63479	50903	66025	70074	46991	0	55132	77057	0	53089	0	0	70627	71449	151260	0	0	90144
1053100	1107400	1061900	1119200	1162200	1172500	1055500	1050800	772040	1116300	1119200	1041100	1015700	1113300	982460	1253000	1179100	1310600	984550	1059500	1112700	1032700	1056500	1141000	1062700	1000900	1190900	1054600	1136900	991880	1005600	999270	1144300	945570	1016200	884300	1008200	1126500	1000400	1116600	997210	1136300	1234700	1124900	1083100	1082500	982420	1123300	1059500	1079500
97167	130190	113810	168430	175400	124800	91099	183790	153760	132510	197350	191920	0	100990	207030	159970	201690	182380	222540	326740	98556	116650	0	248930	184110	81111	160790	159430	169360	121200	0	0	116260	154170	0	151270	179050	191720	151360	150450	193510	178980	148170	171760	141620	152210	0	0	168080	77683
1058900	1324700	1304100	1252800	1248100	1266900	1314900	1270900	1316000	1403800	1417600	1433400	1468700	1345600	1378000	1474800	1337800	1467400	1369500	1321000	1315100	1343300	1304300	1373500	1497500	1380700	1508400	1346900	1397500	1370300	1326200	1206000	1265800	1349000	1177600	1365800	1425500	1430800	1477700	1488800	1414100	1433500	1374000	1248300	1349800	1289600	1178400	1245400	1284600	1226400
7788700	8340400	8884200	9017600	8819400	8557000	8405800	9296100	8902500	8981500	9200400	8836600	9572800	10064000	9735300	10317000	9604500	9737100	9642000	9097200	10162000	9244600	8770900	9504900	8979100	9383600	9255200	9194100	8755000	9093200	9749900	9376500	9012200	9280200	9117400	9168700	9512300	9281300	9618300	8477000	8639200	8529800	10022000	9554500	10165000	8946700	9190300	9710100	8534300	8644100
7297500	8216200	8457900	8931200	8643700	8629400	7890400	7930200	8109900	8196500	8171000	7739300	8786600	8419600	8543100	9248600	8852600	9270200	9301400	8274200	8753700	8466700	8506200	8779700	9027700	8380300	8738300	8576100	8593300	8766200	8210200	7849900	8183800	8164500	8455100	8379200	8738300	8758800	9264400	9143900	8653000	8418700	8794700	8778800	9093400	8804600	8361500	8846900	8087800	8017200
607680	804860	783530	621930	843310	818570	770510	769230	753380	719790	729040	337970	792680	802140	909170	1049600	855750	940690	831340	889810	874260	732520	817660	845460	840670	936200	864820	853200	508150	812140	741180	714520	840430	675410	728960	766870	687420	896110	1003400	792170	943810	607610	739860	753750	825310	812350	695730	752910	745100	697940
102840	95936	72293	100700	62515	54408	65864	97518	93709	92252	105110	112270	119120	120860	122460	98994	41166	47620	119790	71179	62646	63351	90055	102500	126910	80671	64617	124210	140990	102030	120220	91752	111780	57016	92200	113290	68213	56919	80203	108540	32665	104150	114530	24568	32534	75609	54555	111470	100660	50915
524640	587910	644830	522460	684950	673670	538670	607880	484200	652190	591700	572980	594240	468990	726700	802480	688510	682180	651450	653530	776180	548340	715920	661320	577120	672380	700920	544600	685980	733020	492340	527230	515020	573580	440160	274210	606150	573790	816600	602750	666050	647460	485170	635300	362830	436270	600060	703390	616330	472490
13461000	15702000	15336000	15860000	15338000	15848000	16328000	15347000	16525000	15919000	15752000	17103000	17131000	16024000	16168000	16260000	15691000	16040000	16916000	17170000	17650000	16628000	16165000	17086000	16689000	16482000	16193000	15156000	15230000	15416000	15902000	15756000	15570000	14390000	14356000	13604000	16638000	17018000	17353000	16402000	14825000	14803000	16083000	13488000	15289000	15132000	15283000	15166000	15433000	15310000
4655000	5743400	5158300	4890100	5185200	5487300	5235900	5383800	5540200	5559600	5407900	5779800	6016100	5724100	5742400	6328500	6014800	6133400	6638000	6938800	7032000	6627100	6126100	6419500	5994500	5654300	5981800	4957700	5155200	5336400	5542400	5315000	5356900	4494000	4655200	5513600	5826600	5966200	5887200	5761600	6062700	5659100	4827700	5181000	5627400	5209300	4862500	5298300	4979600	5419400
344630	425120	405280	340510	446250	392520	350630	233470	391660	384290	407220	318790	261000	397580	473170	564180	517910	492860	399160	416240	377280	412540	458720	461670	466970	273230	384030	441130	451870	506610	403580	294220	399060	474470	469170	382380	349930	405850	579850	311980	323540	429540	467420	401720	481970	311330	438270	476680	429340	348530
156100	132490	56273	131970	48718	174290	127560	127830	152900	35081	153660	179360	0	33361	115150	142410	36863	137630	28613	51143	32941	40082	83713	35640	141700	136130	44160	24561	141150	134380	158240	144540	142510	55199	144890	119270	114970	54141	129480	0	91842	49381	137710	141040	169110	166450	127340	79405	151380	124360
1584100	1785600	1991900	1830100	1898100	1928600	1967700	1864200	2171100	1888600	1856100	1945600	1823900	1712100	1879300	1826600	1705200	1926100	1848300	1763600	1935600	1795800	1649700	1994500	1775400	1860100	2048400	1949400	1762500	1864300	1849900	1847300	1957300	1657900	1584400	1876400	1811200	2020600	1857800	1819400	1976800	1911000	1808400	1614600	1917100	1898500	1818400	1969700	1691800	1599800
880790	1014000	1045600	977200	1148000	1104800	1207900	1216600	1146900	1188400	1103100	1037200	1284900	1232600	1185600	1219800	1264900	1349700	1168200	1417500	1298000	865930	1210600	1226100	1111600	1172200	1251500	1176500	1104400	1157100	1186100	1088700	1122100	1015600	1135300	1135600	996340	1036700	876060	1176200	1144300	1156900	1311800	1137700	1181600	1088000	1163400	1222500	1178000	1101500
2898400	3181900	3190500	2789500	2836500	3413400	3289700	3124100	2892800	3350700	3170900	2843300	3182500	3280600	3175700	3410100	3149900	3401100	3120800	2788200	2890500	2891800	3072000	2876200	3278300	3094400	3250000	3605800	3244400	3386500	3743900	3483600	3259500	3445600	3156600	3486900	3440600	3511000	3619500	3517800	3358900	3261100	3480100	3293800	3585200	3079700	3064200	3066100	3169500	3222000
252560	277160	304650	319520	346100	312500	274950	331250	270440	350650	293930	327870	214410	210140	247700	308630	263850	265580	296550	298180	322870	314890	311680	368570	255270	297670	279600	324290	303660	273540	228990	216320	214340	205640	254210	272730	263980	247560	227450	258630	318830	277110	252970	212320	202960	233480	268150	284470	264330	264430
19031000	20802000	20913000	20439000	19752000	20658000	20164000	19608000	19737000	20747000	20559000	21260000	23474000	21843000	21891000	21936000	21138000	22435000	21394000	20848000	21645000	20123000	20401000	21369000	22586000	21868000	22793000	21872000	22065000	22233000	21349000	20695000	22239000	20795000	20377000	21930000	22172000	22768000	23514000	21515000	21462000	20967000	23480000	22858000	23963000	23078000	20990000	21520000	20739000	20535000
75338	75628	25711	205750	232580	79472	156710	47572	105870	185930	116730	153220	12376	66112	166230	324500	0	83101	202240	35202	110140	274260	213950	98177	92268	130580	247080	57352	106850	33531	67658	31846	80001	109650	58057	0	101000	231790	129220	219190	43297	57478	40684	25153	107840	50053	28198	62554	244850	105080
1759100	2114900	1830100	2011000	1990900	1963300	2093700	2036300	2071900	2125500	1935100	1756000	2204000	2035100	1975200	1945100	1668400	1712100	1899800	1615500	1710100	1765600	1783900	1832300	2270400	2180500	2032600	2210800	2149000	2200400	2244400	2261900	2220600	2291100	2238000	2450900	2149600	2202400	2351700	2318200	2223400	1899400	2507700	2462500	2482900	2318800	2223200	2377600	2113400	2190300
817330	872920	978890	849410	918490	1000800	886690	941930	959560	824870	891600	910050	965360	898280	1010800	1111300	898430	967420	878670	867910	954550	966020	915790	942540	921360	977180	1021000	974150	928440	956180	920930	825790	940150	803240	945540	888550	1004400	1002100	975240	980070	996070	929770	1012400	898710	952070	920460	974630	917370	858470	831090
1372900	1722500	1823800	1868600	1815000	1776500	2130300	2141800	2026600	2158000	1709100	1963900	1542700	1655900	1794900	2333100	2068000	2292900	1716700	1821800	1546400	2124600	1994500	1786800	1992000	2047100	1710500	1844900	1877400	1786400	1892300	1790000	1849500	1835200	1555400	1848800	1869600	1863500	1622400	1853800	2322500	2105900	2349400	2057600	2374600	1756100	1556000	1780300	1950400	1657900
0	0	0	0	0	0	417180	0	386100	0	160300	469800	629000	826150	0	1023000	266190	917400	0	0	0	0	0	0	143690	699630	447970	0	0	0	6916.2	0	390330	328750	0	427010	113360	137820	0	0	317670	0	173380	308740	0	0	323810	610780	602500	156780
1451000	1771300	1517900	1474400	1655900	1498200	1536000	1650500	1608800	1557200	1625000	1495100	1518400	1582700	1547900	1647600	1639800	1832100	1821700	1713300	2143400	1502800	1908200	1708600	1633300	1541200	1509300	1529400	1538200	1655900	1487100	1544100	1479400	1627000	1435700	1618200	1603800	1618400	1624800	1638500	1564000	1440100	1636000	1259900	1576300	1557800	1623400	1784400	1634200	1568300
867990	1011000	1055100	1046300	1054300	1090600	1093700	1025800	1184500	1093700	1090800	1240300	1313100	1036100	1276800	1393500	1303700	1414500	1167700	1316800	1175500	1079100	1128400	1182200	1291000	1227200	1377100	1148200	1214500	1234300	1231700	1192500	1366900	1102700	1087300	1101300	1134200	1198800	1357800	1242900	1194900	1165500	1363400	1337300	1406900	1288100	1197200	1331200	1176300	1173200
504450	501530	543620	588540	514260	516160	394800	341980	661700	822320	510580	850250	596080	542650	773790	923050	461830	622480	739290	510060	431490	811430	654740	709790	451620	744140	571970	0	394420	548020	426650	861870	670150	656910	695380	768410	583040	423120	1118900	769920	558450	703230	666330	743600	425910	765170	506860	527050	511810	533930
340450	102460	237960	454650	94092	103100	111490	336150	639930	265670	384480	358750	338050	223380	319680	434490	509260	573310	426710	575590	471580	398480	418790	368510	536250	297270	527950	397180	286560	98071	159240	264070	215280	199540	132460	160710	297330	103390	152270	226940	121220	449290	307940	83048	39395	31374	125440	156090	273330	194450
6174500	7249800	6441900	7369300	7095200	7051700	5648200	5529000	5635100	5611300	5685500	6525500	6547400	5987800	6352500	6936900	7058800	7117300	5225200	6370400	5499300	5729200	5844100	5954300	6221500	6168300	6269000	7197000	7441400	6820100	5805800	6323800	6276800	7209300	7151000	6960600	5627400	6198100	5986700	6568200	6672000	6565600	6812400	5988000	6180500	6517800	6823200	7063300	5736000	5990600
39368	31590	0	32924	0	0	0	34350	0	0	0	0	0	0	0	0	69678	86808	0	0	0	0	29031	0	16990	57645	0	0	0	72491	0	0	0	0	0	0	0	0	0	28424	0	0	0	0	22699	0	0	0	18874	0
79844	226750	206590	165340	152680	119660	153560	216810	232030	344240	246080	179180	268740	245050	228670	197810	341730	125830	265720	201400	22891	209680	170720	228130	222180	116580	296320	292820	114230	212450	209850	167330	219570	220220	278210	328720	65499	124230	157830	127720	150170	225600	134640	137570	109320	125590	30401	283150	223300	257220
3062400	3672600	3484200	3490800	3387800	3654300	3574600	3762400	3526000	3552400	3499000	4069000	3651500	3471800	3389200	3665400	3534100	3603800	3930300	3675100	3862500	3527500	3709600	3714400	3609600	3434500	3655600	3548000	3538300	3823000	3528400	3471200	3589300	3565700	3615500	3725800	3639100	3795400	3755100	3469700	3747100	3704400	3704500	3490100	3606600	3679500	3612900	3621100	3511100	3500300
1495400	1761200	1874700	2158500	2020100	1949600	1674600	1818900	1633700	1873800	2035200	1754800	1319500	1478400	1258700	1730400	1507700	1615800	2171600	2226500	2415800	1579700	1608900	1494100	1702900	1626800	1501200	2150500	2155200	1970000	1715900	1800800	1594200	1939600	1971100	2008700	1920300	1856400	1489300	1999800	1763200	2007800	1862200	1606500	1621100	2051100	2299400	2000100	2139200	1952700
0	0	0	0	0	0	0	0	0	0	0	0	0	0	0	0	0	0	0	0	0	0	0	0	0	0	0	0	0	0	0	0	0	0	0	0	0	0	0	0	0	0	0	0	0	0	0	0	0	0
1645800	2257500	2089300	2032800	1959100	1934700	2142500	2370600	2086400	1825800	2010500	1788900	2496300	1990400	2117700	2080200	1891200	2135100	2463400	1956400	2092900	2056300	2187600	2334100	2255000	1945600	2397800	2045000	1955600	1830700	2468200	1870400	2245100	1933600	1887700	1923300	2185400	2489900	2166100	2084000	2199400	2131800	2301900	2226700	2300600	2243100	2113300	1845700	1984900	2183200
0	0	0	0	0	0	0	0	0	0	0	0	0	0	0	0	0	0	0	0	0	0	0	0	0	0	0	0	0	0	0	0	0	0	0	0	0	0	0	0	0	0	0	0	0	0	29414	0	0	0
0	0	0	52430	27774	15100	0	0	0	0	75087	16890	13936	0	28463	0	0	27904	0	58887	0	0	43683	15668	30901	35110	46608	0	19161	0	0	0	12247	0	40544	33558	0	0	0	0	0	0	0	0	106440	0	0	0	0	0
0	0	0	0	0	0	0	0	0	0	0	0	0	0	0	0	0	0	0	0	0	0	0	0	0	0	0	0	0	0	0	0	0	0	0	0	0	0	0	0	0	0	0	0	0	0	0	0	0	0
2456300	2755800	2831000	2985000	2658100	2840700	2619800	2752800	2913000	2656100	2727700	2738500	2878700	2827000	2998300	3147600	2654000	2965800	2830100	2814000	3055700	3070200	2956600	2780100	2980000	2771300	3115700	3085100	2947700	2654200	2911700	2535000	2846900	3064800	2769300	3066000	3096000	2730600	3011100	3126900	2690400	2757800	2553700	2863100	3193700	3052700	2803000	3132500	2743700	2545200
9785700	10767000	10932000	10669000	10649000	10802000	10355000	10559000	10589000	11073000	10758000	10670000	10971000	10610000	10918000	12261000	11494000	11396000	11936000	11580000	11696000	11509000	11431000	11337000	11324000	10470000	11832000	11117000	10994000	11556000	10692000	10814000	10794000	11077000	10605000	11154000	10949000	10704000	11352000	10443000	10244000	10151000	11425000	10832000	11228000	10989000	10345000	11073000	10348000	10319000
4673200	4953200	5564100	5319000	5291300	5648500	4976000	5225900	5296300	5335000	5462500	5587100	5801000	5615000	5791500	6225500	6135000	6037500	5819000	5699000	5624200	5514600	5666800	5826800	5416800	5998800	5831600	5651200	5809400	6196900	5865700	5799200	5742300	6720800	5865400	6349900	5959300	6090000	6658700	6003200	5867400	5594900	6822500	6557800	6709700	6653300	6297600	6288500	5710800	5868900
2431600	711530	5173800	4789900	5371200	3183300	4179100	4155200	5210900	4524700	4598100	5709600	4895600	5981800	1035800	4828300	5419000	3622000	2250300	5617800	6250100	4277700	3980200	5837300	3370300	6602900	144790	4680600	4560000	6052200	4205400	3599000	4130800	3817800	4357400	3178900	5473400	4719900	2939400	6050200	5610000	3031600	4636000	5739900	4612400	3293100	4051100	553820	4113800	4901800
5363000	5460300	5515400	5825500	5838300	6237200	4913000	5124000	5344000	5076400	4536100	5555500	5845000	4746700	5098100	5969200	5941200	6153700	6278600	5919400	5880300	4892400	4895900	5311000	6607700	6378800	5948000	5913000	6058000	6288900	5528200	6156800	6057500	5264800	5289200	5617500	6215400	5867700	5873300	6455200	6473700	5508900	6081500	6413500	6004200	5884700	6118400	5967800	5803600	5822100
63876000	72425000	67083000	71522000	69478000	67553000	69493000	70551000	75172000	71577000	68348000	73284000	78660000	78889000	74048000	78629000	76572000	79314000	80970000	76905000	75755000	69883000	69992000	71373000	80854000	75243000	77575000	75574000	73676000	76414000	71755000	69434000	68730000	70099000	60534000	74639000	74820000	70787000	73929000	74370000	73437000	68329000	74891000	71669000	73826000	73574000	65348000	71728000	75650000	69239000
1009000	1136400	1221300	1293100	1224000	1276600	1181100	1168200	1127700	1123500	1139400	1168700	1069200	989910	1102100	1247800	1197700	1296600	1146600	1093700	1140900	1183300	1034700	1208800	1226200	1151200	1188200	1234300	1231100	1212600	1009200	1049600	1098400	1087800	1114400	1107300	1072700	1187500	1205200	1179000	1145600	1205300	1123900	1085700	1097900	1116300	1114800	1185900	1169700	1140000
360530	50278	50286	767070	209880	129090	519730	454100	514820	485660	295530	477070	515050	60235	117690	391410	611790	582850	795530	99330	543100	507080	748380	346400	779860	459580	365420	245990	242330	476120	29272	122300	449780	205300	539330	0	0	577180	636940	318360	134470	538370	632900	205100	896230	159480	802850	468130	120520	456460
3252400	3272100	3237600	3653500	3298800	3338900	3476800	4056400	3751300	3941000	3605200	3786300	3373600	3336400	3729800	3494700	3611900	3319300	3622800	3990500	3924800	4012400	3322500	3667100	3010300	3433400	3570000	3438500	3646800	3292700	3325100	3122700	3742600	3155100	3298700	3550500	3668300	3711900	3709600	3378300	3298700	3509600	3606500	3694400	4043800	4181600	3428000	3935800	2941500	3399300
2375800	2622000	2321000	2488800	2097200	2268400	2383900	2154300	2401900	2335900	2316600	2101300	2261700	2266700	2440400	2252300	2440600	2652300	2055600	2013600	1886400	2081900	2062200	2111800	2518800	2289300	2365200	2553400	2379800	2505500	2297900	2080800	2155700	2304900	2465000	2423000	2186100	2092000	2344400	2393600	2330500	2270600	2184800	2269700	2193600	2348100	2402900	2179900	2429000	2297600
2920500	2886100	3035100	3075900	3004700	3100400	3059500	2507400	3157900	3315000	3299600	3002400	3270700	3316400	3364800	3763000	3378100	3558200	2803900	3272500	3175000	3140700	3045000	3369900	3527400	3375200	3327400	3135700	3010700	2919000	3285000	2938000	3194900	2774500	2728200	2911700	3428900	2998600	3100000	3385900	3287700	3236800	2530700	2547700	2798500	2383200	2718700	2724500	3129700	2763500
136890	149750	142220	153230	141940	120180	119530	109270	158780	140240	159960	153490	150710	149120	147360	142340	137160	204470	134230	96334	169890	133810	107830	100550	158060	140350	160450	112850	30985	161320	54908	152550	134970	132780	121330	100450	153110	238960	138150	129940	180870	183600	119500	72188	61082	125070	118190	77525	137290	142470
80776	42240	136120	95502	115980	180270	71200	100640	126430	98726	87964	27559	47463	77170	64901	123880	60770	97764	118120	55836	115840	82681	45670	155090	86790	98918	163150	93661	146120	71711	45571	74861	58759	100480	95743	46932	79689	126930	79853	132760	41903	23715	39954	22582	124530	84836	90812	122910	47796	45122
2195600	2651700	2876400	2468800	2574000	2689500	2646900	2752600	2710100	2814900	2853900	3113000	3198100	3198200	3113800	2959000	3225100	3509100	2963900	2939700	2868200	2953600	2879200	3174100	2674500	3178300	3402100	2866700	2871900	2985300	3150100	2988700	3170600	2825200	3109400	2903800	3329100	3196300	3222300	3065400	3142100	3195100	3468300	3280700	3176100	3323200	2800400	3140400	2650500	3021800
1722400	2312800	2139000	1750700	1756900	1639100	1662800	1909800	1780100	1739900	1676100	1529200	1941800	1331000	1019800	1206900	1144200	700470	1435600	959050	1071900	1325600	1233100	1239700	1641600	1304700	845940	2131200	1692400	1908900	1893800	1921100	1756700	2339300	2315900	2539200	1612300	1920600	1489500	2078000	1608800	1814000	1724200	1464400	1638500	1885000	2029300	1893800	2168900	2143900
103180	152280	36547	312880	22031	38947	145860	179180	118750	180260	174870	41483	117630	269540	132400	90685	46819	28233	183920	204230	411360	92007	37646	314950	31270	24570	403480	283620	152980	164560	224880	261390	115960	63741	203540	192860	141430	24601	199960	70814	290360	125760	45703	303960	88326	218700	200020	102660	312880	64315
407860	431940	436310	109860	305480	295330	517800	554880	529240	487430	449380	368070	381660	326080	434480	384060	301080	306060	371210	383230	418030	166570	388890	325800	256730	383690	400300	301530	322480	318250	459920	429120	414380	347200	346750	354750	172180	246250	279150	354830	267070	400190	563030	488090	600860	428290	394770	402140	435990	348070
99545	170370	181360	159160	171000	219160	117520	145950	190780	143400	44238	0	53551	0	144180	656970	103280	55175	146640	126580	168110	103050	128310	87461	154920	68092	120040	169460	165800	172120	0	144940	77815	168900	127300	131350	66598	25761	129960	183130	76821	125110	127050	109490	122340	110890	129240	61734	131640	0
1017900	245840	0	0	977170	1170700	0	1081900	1169000	1046400	243090	1013600	0	1280300	119580	1165200	0	969550	546760	0	1063000	1110600	0	460480	905820	0	1098100	1270000	806750	1016100	0	921350	1319100	0	754610	504730	1088100	1088000	667610	994300	634450	1067400	863120	954500	652370	966380	990840	0	1211700	0
620660	686710	832830	896090	706260	763100	553030	514670	321170	716760	775570	576360	773250	751010	496860	793660	566520	655470	219880	152890	83473	454820	380130	279270	517700	452900	502310	577680	562010	640400	426520	524250	492270	465380	186390	691810	755290	510270	444700	133510	556120	565600	467980	487550	253270	338100	487940	398330	242610	337770
291020	359640	325560	352550	287080	180710	302910	300940	317580	320650	388110	385400	297130	217710	322550	260090	318260	327800	428410	385620	492970	417680	435080	418170	336450	332710	402620	346490	322520	261340	291670	284360	133130	187220	317780	347590	296300	304320	391380	355480	341890	335560	389830	319190	388980	325730	299210	347130	212080	218000
2827300	3148600	3141800	3356700	3324000	3256900	3668300	3903100	3933000	3536100	3579600	3494600	3599400	3315800	3431200	4376900	4332300	4628500	3826400	3798000	3671400	3753100	3784300	4019300	3706000	3627400	3780800	3810800	3755300	3972000	2823400	2884100	3029800	2872700	2902000	2932700	3653200	3770900	3783900	3869700	3913900	3808500	3270100	3128400	3336200	3529900	3310000	3450500	3255200	3255800
651340	744580	760090	692890	1242300	655260	976950	725400	1371300	632830	848170	1067200	1208900	1257700	774360	1559400	944180	1242100	980890	1007900	640100	905110	877380	756290	1523900	1438400	1075100	1183400	866390	872510	1600500	984740	1559700	1203400	1072400	1142500	1116500	980870	1391600	1007000	1160900	1197000	753450	1136200	496860	1015500	541600	1013400	1348900	1246000
115400	126060	0	0	134980	0	0	0	0	0	154850	96661	136520	0	124820	0	123800	0	184640	101500	70777	50153	116130	0	0	161620	157520	64181	0	122410	0	0	0	0	0	0	0	0	0	0	0	0	0	0	0	0	51847	0	0	0
4450000	4834400	4805000	5216600	5223200	5183900	4510300	4279000	4481400	4766600	4772200	4949400	5005100	4725400	4740300	5148200	4802100	5315600	5223600	4899800	4761300	4697100	4531400	4810900	5086700	4765700	5102900	5144400	5220500	5404700	4845800	4491700	4724900	4702700	4559800	4852200	4913100	5003300	5091900	5264800	5220100	4828400	4955000	4660000	4469700	4816400	4563400	4397800	4747600	4667200
26689000	28946000	29427000	29761000	28086000	29080000	29580000	28091000	26711000	27609000	26554000	29313000	30444000	28895000	29106000	28776000	28115000	29496000	30945000	29768000	32162000	26953000	25812000	28911000	29344000	27967000	26563000	31081000	29006000	30297000	30291000	31283000	31021000	27167000	30805000	29543000	30636000	29017000	32257000	30674000	32746000	29245000	28141000	27795000	28748000	31844000	29859000	32182000	31923000	32110000
0	0	0	0	0	0	0	0	0	0	0	0	0	0	0	0	0	0	0	0	0	0	0	0	0	0	0	0	0	0	0	0	0	0	0	0	0	0	0	0	0	0	0	0	0	0	0	0	0	0
237670	355930	335720	283130	261460	341130	326590	371900	279960	300820	353780	347930	368520	401080	406890	375390	351990	536870	377280	437160	328440	427400	331290	472970	421170	425970	404210	299430	247380	195420	268390	298040	258290	287550	198000	316940	329270	340950	366270	315400	353700	371290	180450	374370	331350	287980	281730	331240	363180	325970
11940	7337.2	33809	29627	10204	10826	10018	6794.1	12872	14062	8690.6	25971	4530.7	5371	7329.6	7492	13287	16933	699920	590440	494930	5611.7	16286	19110	8543.6	3412.2	6956.4	11381	16227	17873	16768	15351	5383.4	9829.8	6423.2	9592.4	38325000	41503000	39444000	9997.4	8291.7	22968	7854.5	27355	2469.6	7830.7	4035.5	11410	11085	13047
43108000	46304000	45316000	46634000	45194000	45803000	45692000	44974000	44327000	43685000	44302000	44370000	47731000	44937000	46342000	43383000	39914000	40338000	44887000	43005000	41602000	41925000	39659000	42445000	46915000	43626000	45779000	48619000	47307000	49661000	50666000	49543000	50420000	50663000	50978000	52857000	50199000	47572000	50142000	49282000	49980000	46484000	53909000	53568000	53979000	58225000	51832000	51681000	49801000	48631000
5465700	7155500	6013600	7268800	5600600	5291100	7315900	5881900	5861200	5470200	4824800	5560800	6521900	6153500	7059100	8015400	7438500	7537100	6949000	6302100	6028600	6029700	5309500	5850700	6939400	5498300	6320600	7905400	6724200	6776600	8855800	7481100	6796200	7132500	6935100	7011300	7099900	6438100	7204200	7499800	7302400	5668700	7802100	6961900	8091700	8615000	7671600	6504600	9472800	6941600
1675500	2072500	2056600	1866600	2034000	1884400	1877600	1601200	1652900	1675900	1681600	1793700	1769300	1721300	1783900	1892100	1620500	1757400	1929300	1827800	1720600	1683300	1650600	1701700	1884600	1724200	1807300	2053300	2011400	1900500	1912600	1809200	1982500	1903600	2033400	2063500	1920200	2076400	2039000	2004800	2060600	2055200	1935100	1775100	1984100	1976100	1737900	1931200	1824200	1861100
1551800	1595200	1813100	1886900	1736400	1581800	1710900	1425600	1924900	1426100	1256700	1295500	1656100	1163400	1887400	1964600	1904200	2161400	1846500	1718000	1616600	1897000	1694900	1807500	1844300	1561500	1629600	1857700	1893700	1868800	1577000	1600100	1729500	1295500	1603100	1698300	1951200	1956900	1882000	2147200	1806700	1794600	1858900	1550900	1860700	1650800	1712600	1736600	1847400	1895300
1134900	1228600	955650	1032700	1279800	1195100	1087200	1173000	1127700	688100	1188200	1031200	1063600	923360	1191600	1289400	1478400	1342200	1384300	1427300	1054400	1302900	1380600	1165100	1453900	1242300	1305400	1126700	1181100	943750	1286400	1232800	1262800	1325300	1223600	1240900	1179300	1258000	1183100	978650	1114300	1227600	1299000	1217700	1217200	1296100	1169400	1155000	1299600	958990
0	0	0	0	0	0	0	0	0	30854	0	0	0	0	0	0	0	42446	0	0	0	0	0	0	0	0	0	0	0	0	0	0	0	0	0	0	0	0	0	0	0	0	28053	0	0	0	18227	0	35880	0
0	0	0	0	0	0	0	0	0	0	0	0	0	0	0	0	0	0	0	0	0	0	0	0	0	0	0	679.5	0	0	0	0	0	0	0	0	0	0	0	0	0	0	0	0	0	0	0	0	0	0
0	40672	0	0	21710	0	60130	126390	63952	24778	0	0	19730	31724	0	9706.4	44800	63926	66338	0	0	24114	78892	0	78593	19687	0	17031	60223	49236	0	36847	0	0	0	9885.9	66633	0	0	18864	0	22075	0	0	10599	0	30159	14366	14330	0
0	0	0	0	0	0	0	0	0	0	0	0	0	0	0	0	0	0	0	0	1746.9	2890.3	0	2187.9	0	0	0	0	0	0	0	0	0	0	0	0	0	0	1996.5	0	0	0	0	0	0	58765	0	0	0	0
6947400	7138700	7594500	7200900	7693200	7742900	7419600	7569400	7335500	7766800	7594200	8152100	8004200	8042800	7591900	7789800	7836900	8266000	7781400	7101000	7790200	7250700	7587600	7763700	7033400	7466500	7859500	7612400	7434700	7453800	7282600	7040800	7032800	7502000	5687900	6637400	8075400	7900800	8075400	7856200	7253800	7628200	7337200	7778400	8078600	7754300	7273200	6871700	7452000	7133000
167240	158020	85045	195340	148900	211910	88649	242980	160910	45672	200020	162330	184380	112640	118290	70917	80447	241480	139200	53658	191260	109500	79516	169660	130900	209720	209460	194640	93760	160630	77002	103090	174440	42791	159170	77817	199310	159340	80350	84240	146930	185570	237230	60767	214610	157460	153860	159540	154440	92718
3134700	4460700	4029300	4214300	3867600	4255900	3332900	2870100	3272000	3697900	3642900	4033300	3905200	3939700	3938400	4418400	4408400	4631600	4360000	4134800	5080400	3953600	4219600	4469100	4222000	4101800	4460400	4132100	4212400	4423800	3637100	3611000	4224200	3643900	4540900	4102900	4108600	3168700	4401800	4223400	4252600	4190100	3702200	3167500	3672500	4004100	4347400	4208600	3525600	3881700
258410	274860	162500	274500	396900	319280	171780	287770	287040	278000	249660	310950	314500	234050	271470	263050	272420	150020	198200	346530	247200	295940	263270	227850	172480	297940	240210	281480	304440	150820	233260	191550	205370	233470	245290	221270	226210	304170	131520	234110	296600	188660	220350	173360	159260	145970	242340	70183	252370	385700
931590	1161700	1028800	1318500	991750	821580	1193800	1203100	1024400	1157000	1168800	1022500	1112700	1164000	1231800	1089200	1221400	819850	1390100	981410	974540	780670	1209700	1349900	1199800	1191600	708870	1346500	1132800	1404300	1258700	1141700	1149600	1184900	1257700	1148200	1249400	1174800	984730	1217600	1189300	1048800	1258900	1270700	1152300	1344600	1256200	1245400	1339600	1149100
123160	163970	219950	187160	310210	329920	285700	147790	234670	334250	189440	216660	443570	344970	276770	287680	79843	356740	155300	51094	166280	217040	138870	319710	70747	123300	435860	228410	233140	233180	189050	122810	307120	183160	236330	239450	240000	196700	96926	247820	217810	54289	161100	170650	232080	175820	113070	172030	179460	273170
0	0	71336	81475	0	0	26659	0	19875	30085	86833	0	0	0	0	0	64369	35969	0	336140	87249	25961	106730	0	37814	0	0	31333	0	0	0	0	0	65349	0	0	0	0	33616	63022	0	0	0	42830	0	0	0	0	0	0
366770	359520	479900	365950	420520	386870	310820	366910	331900	429210	407910	535960	357530	341090	372420	450730	449860	464750	497270	502060	441790	373250	444410	429200	403300	407190	445960	413100	399650	412290	397000	299210	396300	355280	325130	380480	444680	417590	404120	407830	455510	456920	349960	334190	349230	420090	396190	464820	410710	416240
1162600	1064500	1315000	1383200	1242800	1300000	1160500	1186500	1017000	1374700	1284900	1252100	1279200	1356200	1358800	1515100	1308500	669990	1138500	1148100	1373300	1304700	1161200	1398900	1480500	1512600	1340600	1435000	1426700	1502500	1325300	1355500	1395900	1390800	1531400	1437600	1338800	1359700	1254000	1240400	1315300	1275000	1530000	1347700	1463300	1532300	1410300	1284800	1363400	1233200
197640	241620	288290	211290	243710	238690	293610	104870	283230	157710	180700	322240	334820	209500	317040	355260	353210	362460	318950	184120	355340	365320	377780	394820	187400	317780	340680	258220	126060	294140	268800	290810	240000	239200	282630	159380	346150	138550	298760	266810	234390	292040	250570	215730	228480	181650	176060	223110	240270	246560
102030	58984	96489	101900	108190	57382	122240	110330	100640	115490	113590	18439	62198	46504	76367	98494	94463	103200	0	71015	64766	84316	84115	101990	94879	70468	95753	109790	122280	110080	123020	6209.1	102370	106370	107480	79916	0	95278	70100	92829	89540	100270	97630	110500	67909	34180	105830	104340	45603	44223
1136700	1402600	1293700	1445500	1296300	1234500	1337800	1288000	1352800	1263600	1382100	1305600	1203400	1295600	1405300	1279600	1143300	1295800	1434000	1265400	1422700	1324400	1417800	1492300	1333900	1098500	1315600	1185200	1301800	1254400	1353800	1257600	1296200	1168800	1020100	1246600	1368400	1215000	1327400	1150100	1277700	1211100	1453600	1315700	1342900	1284500	1143000	1185100	1193000	1185100
720530	776060	830770	879430	762550	727020	699880	712110	757840	738790	746030	811470	877670	821390	821800	936070	780460	901920	769840	786610	858250	797950	813370	834960	785880	828940	771780	799610	597620	786000	817820	817580	806600	825730	802980	820710	879850	728170	791790	776470	818320	775100	823500	823470	813540	772800	733110	661250	821990	715600
806210	938800	1063100	792540	941500	945780	1222800	991540	1054400	1112600	856740	1154800	1018100	935240	953220	1117000	1040400	1150000	958110	780690	865930	843220	1052300	916680	1002900	933530	833860	901490	832900	864540	891620	834870	985620	705040	727150	854770	800190	866730	892180	841020	588690	857610	1023500	969130	818800	858910	826740	881830	813800	887970
13693000	15795000	14891000	15483000	13986000	14408000	14261000	14562000	14701000	15447000	14811000	14040000	15659000	15419000	14510000	12940000	12471000	12938000	13956000	12424000	11576000	13615000	13056000	12345000	14646000	14257000	15079000	15696000	15754000	16201000	15911000	14461000	15951000	14675000	15100000	15472000	16325000	14176000	16026000	14075000	16131000	15228000	15489000	14394000	16159000	16087000	15067000	13794000	16127000	15819000
41560	65101	95119	63385	0	53581	249340	279410	301680	73030	155040	144290	32560	48161	86777	177680	230780	308710	124280	100030	205860	193110	300220	204390	136420	102370	126820	140500	25851	110690	96857	65411	89752	119000	68687	121800	0	26309	0	85347	100470	85738	41046	42560	94320	137180	0	141800	123710	0
25600000	29944000	29366000	26910000	27715000	26298000	30318000	29977000	30722000	28275000	30677000	32422000	32076000	32875000	30577000	30909000	30073000	32935000	32358000	31809000	32067000	27548000	27821000	28784000	30656000	31465000	33675000	30080000	29316000	31382000	30773000	28347000	29562000	30458000	29511000	28269000	30357000	34048000	33930000	31068000	31244000	28568000	34005000	35724000	32852000	28084000	30556000	29237000	29297000	29131000
847600	853740	40744	517390	572790	157600	362550	125040	291440	503490	115640	285710	307440	273860	744280	101910	69019	53817	447560	635180	530390	423670	613250	214140	510430	200450	232150	632150	78071	512760	477030	492980	331010	0	0	158760	449530	34190	43299	513930	163120	27430	428430	31180	358250	35012	305460	328390	261160	165510
276810	266870	346420	260930	302990	281140	318400	325210	397170	309340	267670	338780	326840	365690	384200	444070	682860	429470	290880	290810	240750	282320	257920	261210	387300	268740	241820	105700	276160	302190	246450	287920	259710	133730	254970	156530	260280	289770	240540	221760	187230	68277	237640	293480	290890	160620	222040	228600	351200	183760
0	0	0	0	0	0	0	0	0	0	0	0	0	0	0	0	0	0	0	0	0	0	0	0	0	0	0	0	0	0	0	0	0	0	0	0	0	0	0	0	0	0	0	0	0	0	0	0	0	0
114900	31707	32530	52815	32433	68772	164380	170120	88663	117930	110700	104980	90286	134200	73118	40786	24550	177660	88873	206250	138360	148710	89695	166010	27227	113920	56788	62324	30928	80163	40499	116580	76696	58123	71249	47181	62630	57340	47161	46894	19186	0	138430	43396	92514	110440	116840	0	50513	132810
0	0	0	0	0	0	0	0	0	0	0	0	0	0	0	0	15833	0	0	0	0	0	0	0	0	0	0	0	0	0	0	0	0	0	0	0	0	0	0	0	0	0	0	0	0	0	0	0	0	0
2040500	2403000	2757000	2722100	2593000	2867500	1877000	2440400	2449900	2363600	2346400	2434700	3221100	3143400	2790400	3215900	3100900	3259400	2742500	2655700	2972600	2773600	2883300	2969500	2946700	3171500	2946300	3105800	3147100	3091400	3004700	2772700	2501000	2741200	2394400	2991600	3004100	2729800	2896600	2770000	2780900	2756300	2650100	2572400	2707600	2721400	2569100	2710100	2705700	2616000
120090	190670	122670	102020	134740	241990	109750	181250	158640	265990	249980	140940	115420	68284	0	127380	153730	190480	140770	158500	77447	183620	19162	169160	253650	180050	189530	178280	137150	155800	238950	194460	148840	167990	53445	204590	321020	56808	122220	135760	45581	229960	169920	203720	284920	354250	164820	0	287010	0
238750	235480	232130	290290	260320	301220	253220	289710	265940	262980	242210	272580	222850	223290	317530	335270	290890	295380	238270	320840	250300	276430	283830	306270	273770	295560	279000	277970	248150	281930	243070	316890	293690	280660	299920	164470	261740	340850	211260	294470	292480	317710	294790	247620	295590	217410	336420	269420	241010	267280
118160000	127370000	130190000	134320000	129900000	133770000	121880000	121090000	117320000	127310000	123840000	130180000	140470000	136230000	139340000	134890000	129040000	134450000	128210000	118310000	129670000	127490000	123790000	130470000	134470000	132560000	133680000	137780000	141320000	140290000	146830000	136990000	145750000	152180000	148880000	149650000	140040000	137720000	143300000	135750000	133580000	132250000	150180000	142960000	147670000	146030000	135940000	143390000	132470000	133130000
0	0	0	0	0	0	0	0	0	0	0	0	0	0	0	0	0	0	0	0	0	0	0	0	0	0	0	0	0	0	0	0	0	0	0	0	0	0	0	0	0	0	0	0	0	0	0	0	0	0
369300	224320	140680	307500	52752	157090	251050	388120	190790	124610	243600	142270	519640	411910	223020	324260	576750	359220	323210	348040	469780	422840	363720	316360	356080	440850	339200	421660	234890	402310	680290	96893	256880	416200	209520	0	391980	400600	280880	231790	350890	295550	177510	295280	227840	204760	118000	167740	225170	185340
642980	801700	669940	688260	954560	837300	1149700	1270900	1261300	1202100	758970	1148600	849640	533820	784080	940680	995490	1049300	1021200	852620	559930	929490	953320	1075400	1053700	922330	946930	931940	903190	504380	779590	833030	819420	818860	815950	764420	507760	771810	169300	921680	985270	363400	1056500	1193200	1207600	1097200	922770	875750	718520	994490
0	64949	68256	99710	63274	61543	52331	56422	93691	75316	60445	62758	0	47956	46837	97352	0	52606	0	46483	59214	72621	78623	67704	39859	0	0	70104	26605	73440	0	30025	0	86125	0	0	0	52001	62391	0	0	81179	0	29101	80089	0	90791	48669	72259	61998
1213900	1074800	1127800	1014500	944970	1024000	615020	1060400	889660	1034100	781190	280990	591020	1108600	1299100	1332600	1016100	1729300	1065100	1709100	1069600	1167700	1169200	861020	1367300	893980	1213900	1060000	891220	1380300	983620	589470	1052700	709330	912060	838330	895720	706840	880040	1247000	1211200	962350	373750	376060	1029000	871380	706630	526270	513140	616770
34188	77293	0	29303	46522	27060	57273	84361	100160	81371	62493	69242	0	18196	43393	85111	341450	74697	170580	91411	99049	35748	63881	45338	58102	84063	62631	58650	74251	0	51709	145190	72679	67427	65145	48125	95879	41711	65568	31259	54542	58758	66262	60379	71824	78179	67474	70393	50428	85989
84848	53151	162060	79497	52234	74865	44950	107620	74336	22088	20265	15497	34994	110590	15353	36031	0	0	46248	0	8137.5	19189	16098	47356	17495	74579	54898	65925	79448	75466	95966	63738	28615	21496	30133	51530	11747	74778	20455	86098	17376	36487	46693	0	138060	99487	22704	95947	54649	125840
390530	349030	514060	735070	559640	622740	438230	436600	402060	454540	485750	486660	592680	547870	542490	577390	569610	618890	447540	494880	585730	406470	601620	478300	479440	686990	522950	675800	648200	634610	542230	467160	497200	493660	608330	525780	373430	518380	525870	545800	604330	459810	482810	392890	490300	545250	535120	528790	279940	534190
0	0	0	0	0	0	0	0	0	0	0	0	0	0	0	0	0	0	0	0	0	0	0	0	0	0	0	0	0	0	0	0	0	0	0	0	0	0	0	0	0	0	0	0	0	0	0	0	0	0
21985	6985.4	0	61801	48369	15140	41922	47470	72504	0	7117.5	8425	35775	58985	90696	120050	91725	95403	47412	42751	58642	90043	52087	84782	43384	40416	6202.1	89984	43394	4827.7	21335	0	19360	103820	64616	22128	21253	14181	27725	0	73690	78730	37997	42579	95035	0	0	15074	58701	35199
923840	1179200	1468500	920510	692730	809650	895460	995950	1131300	925950	665790	1191700	1199400	1818300	1003200	1065400	813080	970240	761250	792930	822690	969560	866030	792940	402340	1266600	1234900	1102800	1329400	690080	939900	1120700	1197300	932250	902520	878480	865640	1283000	1250300	446330	1125200	1104300	855590	921280	1310600	717680	983090	1022400	794870	1271700
718020	734290	683750	786880	876180	779710	780290	835740	818810	778060	771560	684400	889180	662810	773930	852840	780580	857110	502140	601540	569590	684450	544130	612090	742390	600920	875800	936400	860370	901980	739710	756030	911720	914240	851490	1005100	748160	835350	749780	810440	794620	902180	864950	760090	730520	830450	808750	939510	806070	776140
91010	346340	196080	174260	302520	305660	224190	185910	280790	126730	405690	204160	286640	165410	310300	318300	360930	231450	284470	504160	419560	397870	267790	341160	0	247180	226270	176890	293070	200510	98884	116730	228620	52010	201620	287820	138680	333050	212040	216130	271530	97909	158120	152860	86018	331670	250660	216780	0	193490
51975	24709	97945	55694	83906	52382	76549	22888	12203	37647	92180	27856	57122	58038	6971.5	16828	36839	36576	0	0	0	70042	0	0	39033	38322	45997	79814	101010	58616	73375	40214	35289	36687	75129	45050	0	25056	42055	0	79501	51534	32309	37551	15240	0	12709	68105	21235	29655
0	0	0	0	0	0	0	0	0	0	0	0	0	0	0	0	0	0	0	0	0	0	0	0	0	0	0	0	0	0	0	0	0	0	0	0	0	0	0	0	0	0	0	0	0	0	0	0	0	0
123060	95874	79979	47418	204990	289860	51791	258920	200270	293990	24677	226760	329200	265400	28581	101320	143410	442610	230480	547800	113590	112950	351580	272130	299210	248530	274440	90956	372540	537000	68373	220000	108430	350780	231310	215710	303170	422990	237280	189960	135780	67944	345950	418350	426300	383170	271550	291170	62681	44913
4014900	5094200	5238700	5315100	5658100	5761400	4798900	5158300	5468800	4977400	4829500	5517800	5097800	5196000	4566500	4983700	5602900	5264900	5398400	5171100	5842500	4868600	5440700	5447400	5758600	4850800	4958000	5223300	4906300	6388300	4934800	4385400	5260300	5142600	5663800	4696900	5201400	5634500	5258800	5514700	5407400	5126700	5153600	4744500	5570500	4544200	5450500	5328500	5192300	5306900
277020	336650	239270	143680	232040	67551	299980	308380	374050	188140	166580	247790	248550	244150	321370	150110	257420	357710	98076	332880	252370	321060	71171	196590	104930	178180	61904	306750	398890	274110	223910	267650	362650	404930	163860	398970	236660	217140	234430	75665	323980	205620	366350	313230	379080	332860	657620	366700	224060	345060
673790	1026700	1011600	928740	945630	913980	908940	902040	1013300	928310	816910	500190	1014700	1030000	992020	1035100	1017500	1023500	1142000	1192900	1275800	1154100	913720	1249700	1013600	1069400	982300	1123800	1033700	1046000	1032200	915240	960570	889030	833410	956190	901060	928890	1110200	728020	1028300	499050	962310	905370	1040900	960260	813330	1115300	954230	820870
6879500	7624500	7976700	8030700	6850100	7636600	7774100	7307400	7855500	7841200	7565700	7299300	7683400	7261200	7216500	7473600	7252700	7805200	7789700	8033500	8406900	7638700	7687400	7655700	7568400	7240800	7668700	7848100	7867000	7887300	7751500	6871600	7158600	7760800	7165700	7993300	8171200	7752100	8223300	8149300	7926600	7949600	8818300	8010200	8111900	8381800	7497300	7909200	7425100	7179000
197600	178760	164860	200390	165580	159440	160180	182580	163890	165420	154450	194620	152640	159180	66840	161980	109700	155710	113190	103050	101160	156330	111350	111990	151250	86988	157210	174600	157490	133430	102770	167870	148110	114040	138150	145160	185980	153030	185300	193670	112220	162210	123980	111840	103550	134650	129670	135530	143790	146400
11081	17132	0	0	0	92075	0	0	101370	0	66008	39799	0	0	0	47864	0	130060	66498	115240	208810	206730	17274	19573	77606	0	79605	0	9578.5	0	0	85839	0	0	0	6015.6	72853	30793	0	120360	0	0	108540	109020	68500	0	0	0	43562	0
3312600	3846300	4135900	4491200	4181800	4322600	3706200	3766500	3920600	3739900	3746600	3958700	3771900	3664100	3854600	4422100	4005600	4422800	4340400	4004700	4541200	3655800	4079100	4341300	3761200	3884500	4028800	4354800	4229000	4405200	3778700	3576400	3808100	3822200	3961600	4208300	4192200	4088400	4430000	4370300	4284300	4412400	4359800	4065600	4764000	4519100	4551900	4342300	4118600	3644300
0	0	0	39493	0	14620	32294	0	0	50406	0	50804	20489	0	0	45793	33162	0	0	50842	50928	53262	67229	0	0	0	0	0	0	28159	52565	0	0	0	0	0	48510	0	0	41669	0	102100	0	0	42219	45030	0	32243	39969	32259
261600	324750	204610	302300	179870	356420	300380	289980	166270	85263	344490	92204	298550	231750	317510	0	0	0	62313	0	84755	189620	239580	193170	0	233390	242890	171860	0	45565	94191	0	166510	212370	0	244480	280520	0	241470	288820	372100	129820	227840	154360	0	327450	287640	0	263610	231560
1241200	1298200	1093400	1395800	1311400	1347700	2000200	2013700	2119400	2321000	1834100	2133900	1750300	1686000	1659000	2110900	1950700	2094200	1565900	1729700	1621500	1653100	1741700	1954700	2028300	2019800	1571600	1385700	1588600	1565800	1664600	1594200	1640100	1875800	1762300	1935300	1584000	1646700	1030100	1809300	2117900	1861800	2519000	2320200	1928700	1917100	1966100	2010400	1457600	1955900
409580	475940	546540	449550	413200	419650	383980	517040	439880	415080	357890	465970	467160	458180	497810	496510	371710	442950	533950	486340	531840	463990	534890	486030	481100	533550	465160	465910	468470	363430	448940	470750	469190	458680	412970	381270	525920	502380	523620	525030	487770	458150	435140	478870	484670	464540	465950	504200	466050	444110
52145	41773	0	63848	61726	14447	86500	102870	41527	101630	56658	64979	41761	41015	81651	150160	28820	32055	14643	57393	75753	44906	54558	30397	0	120990	109390	17102	30396	37623	6455.9	47268	8638.2	34361	65641	23024	44675	28528	17472	61836	66938	52193	16608	104990	60550	8918.6	3849	8604.9	24195	51004
161170	180570	241020	241050	275720	257750	289100	403520	324140	273340	241570	322480	208570	264590	151370	116170	98837	79570	124530	70191	240010	174330	215700	227730	211770	152080	154770	144730	242490	123140	141240	131770	283070	168120	241930	335410	247780	263280	268280	327220	231200	305270	287910	137900	289330	156990	264850	200200	236430	149520
0	10247	18850	5800.5	0	0	0	17937	9285.2	0	0	0	0	0	0	4857.5	11160	0	0	0	0	18479	0	16921	0	0	0	16022	0	8656.9	19870	0	0	0	0	54694	0	0	0	0	0	0	0	19661	0	0	0	0	24839	0
17085	70587	70602	42432	40076	14815	37683	25434	12921	49808	0	39556	37439	16618	0	113150	26619	37854	0	61452	67349	82417	59502	0	66899	41522	0	45055	46893	0	56895	0	123470	30497	0	14207	51685	28154	71725	63783	0	11653	0	0	47528	44831	216220	21716	0	0
201290	197410	152290	47778	144770	147900	137980	137910	83012	103170	131650	143910	197920	144390	125340	123630	37961	138700	97534	189000	129500	208220	143930	90803	146750	149290	126120	156190	137130	43306	115540	107880	169640	189930	184710	182240	206800	116150	59909	124880	199070	148610	68639	65521	150370	84260	69816	179360	124060	143370
267230	290660	302950	257300	197070	493760	348690	229070	429840	429340	154030	170590	336970	238650	122360	500890	413010	325190	379020	426330	426520	362870	382760	349050	302120	273010	380620	359320	271020	287980	290250	240380	175600	372340	386700	427690	257480	301010	349520	140870	314390	528590	243610	337780	303030	186570	360740	151620	304770	355580
788880	1319300	1020800	1106600	953870	909460	1067900	1097700	1203000	1140000	965160	933480	1058900	1104500	1084100	974220	964200	965290	798370	964090	571000	727080	1022700	729630	1084400	1122500	959490	883420	979910	1023000	1075600	1054300	1155500	1538800	1117500	1321700	1029400	1101200	737870	1061900	1272500	1008900	1033000	993510	1154100	1032700	1012300	416940	828220	848460
29020	77165	29667	14445	0	18574	17155	36831	0	84276	77417	0	32539	0	22088	0	39529	0	0	35417	83380	0	54033	0	0	0	0	13400	50396	0	42029	0	0	0	14073	16674	0	52666	9420.3	66337	39364	59130	0	0	0	31091	41116	0	0	28801
0	0	0	0	0	0	0	0	0	0	0	0	0	0	0	0	0	0	0	0	0	0	0	0	0	0	0	0	0	0	0	0	0	0	0	0	0	0	0	0	0	0	0	0	0	0	0	0	0	0
1963600	2021800	1996500	2298900	2173300	2172600	1900700	2189200	2060200	2129300	2176100	2187300	2200700	2047500	2157700	2225100	2349400	2282600	1932800	1859500	1782600	1905200	1834800	1954700	2019700	1991100	2083500	2097700	2283600	2269500	1980900	2125200	2235200	2012200	2120500	2161900	2068500	1961800	1822700	1993200	2108500	1988900	2249800	2051600	2120800	2092800	1995700	2040300	2080400	2024300
1751500	2021100	2042600	1980400	1873700	2013800	1972500	2061700	2105700	2034800	1932500	1996700	2326800	2205300	2259200	2309200	2249600	2132300	2250400	2018800	2263300	2073500	2101000	2247900	2290600	2070500	2223700	2102500	2099200	2163300	2086800	2014100	2124200	2134100	2002700	2157700	2251300	2244800	2329900	2281200	2244700	2226700	2361400	2193900	2360900	2250500	2169500	2213000	2087900	2004400
814620	844380	950660	897620	901100	935020	1005300	955960	1040400	1072000	899920	1103100	1037800	1105300	1123600	1038000	1034700	1026200	882570	1029400	1021800	858330	920570	933930	1057700	1073300	1088100	903190	904170	910750	1091200	1119900	1175900	1003800	979270	1014600	985620	923480	984830	1028000	983150	1084600	1193300	1076500	1217500	1066000	1018500	1042600	1076400	1041300
221950	28499	6915.4	212470	0	13563	15762	0	1530300	13165	0	0	53719	0	12236	22636	0	0	0	0	0	1247600	188350	1562100	277350	1784600	0	11155	0	1888000	1568200	168470	41876	1280100	9243.7	1246900	22990	30305	12655	0	0	542180	0	0	322030	527000	0	0	23296	32161
775170	732060	807760	759640	876760	824800	709960	648080	695190	668000	647290	693280	656950	740880	613690	809570	764040	776370	819340	559520	810370	883730	961440	871620	419310	660620	598950	760970	655870	692390	604600	570800	688690	592080	907830	834030	831540	656770	563550	934670	340860	678020	186780	469080	292240	829750	675620	703770	686520	664920
2656400	3005600	3240700	3087200	3044400	2851200	2479600	2644500	2765500	2718700	2897100	2990800	2841100	2830100	2858000	3368000	3045000	3223000	3225100	3086100	3570500	2823500	2757300	2842200	3002400	3124400	3153300	2700300	3085900	3140100	2907400	2935000	2931400	2796300	2827000	2875200	2680200	2322300	2901700	2692100	2850600	2577100	2782300	2675500	2618900	2521200	2471900	2689000	2731200	2479500
8258700	8796100	9205500	8794500	8709300	9057700	9852100	9870300	10459000	9393400	9762000	10219000	10636000	10692000	10656000	10095000	9846600	10659000	10411000	10320000	10914000	9959600	10238000	11066000	11446000	10902000	11529000	9290500	9049300	9499500	10821000	10809000	10781000	8858300	9333600	9458100	10376000	10306000	10433000	9750100	9870700	9470700	10604000	9669800	10472000	9288200	9586400	9999400	9824000	10130000
2598500	2771200	2758400	2906200	2863500	2757700	2670900	2537100	2672500	2800000	3137500	3331100	2784100	2527400	2563500	2976200	3193000	3145500	2565300	2666800	2631400	2404800	2756700	2831900	2649000	2781000	2616200	3123700	3331800	3378000	2216500	2363500	2317100	2259300	2246900	2435500	2584300	2600400	2786200	2875500	2845600	2739700	2136200	2165700	2028200	2221600	2193000	2381500	2141600	2147700
865960	841110	913650	925320	890580	875130	855560	835000	936010	885240	894500	754220	878560	923970	906670	1036500	954090	1039300	1017400	948310	990940	883130	915390	864750	810710	903170	892390	957130	905980	962490	816170	866250	888070	971040	914400	846770	932460	968210	958730	920670	921260	920260	1034500	861800	952740	931260	937090	963280	850850	873690
163380	202760	169510	182560	177360	196390	180200	183830	180520	159100	180680	181620	180530	190240	226910	177670	187740	191920	165700	186160	160390	179920	135810	156320	189620	223570	226280	166770	162010	187680	182420	181590	193330	189060	163360	148450	190640	186140	188200	206430	191840	200830	111570	213920	227050	181690	199360	217900	128700	161970
0	69142	159800	96692	89134	0	117050	110830	238930	147100	198100	0	120030	0	66494	50251	177850	0	72231	95354	91072	223420	99780	49044	0	47797	0	108990	69106	106330	0	57498	53161	0	0	76410	0	0	0	91262	101930	0	17810	46491	56626	40690	87900	0	105920	0
0	0	19246	0	0	0	61169	119230	0	0	0	0	0	0	0	0	0	0	26326	0	0	0	0	0	0	0	0	54366	0	0	47441	0	0	0	0	0	0	0	72403	18592	0	0	0	0	0	8674.1	0	0	46353	0
2103100	2200900	1749800	2178600	2206700	2192800	2032700	2211100	2272900	2172300	2184000	2221500	2448100	2199700	2341400	2501300	2261200	2438900	2670200	2406300	2753400	2329900	2399900	2107600	2356400	2294200	2491200	2328300	2335100	2237700	2268600	2201700	2237400	1986000	2012300	2192800	2371600	2363100	2397700	2326200	2245100	2342200	1916400	2015400	2104200	2126000	2098800	2102200	2188200	2056100
71928	247210	129060	217460	242350	243660	190290	212220	151240	118780	60307	167670	218920	216680	263330	248520	49555	211740	188740	250140	245960	220700	165390	162420	101060	118350	300810	232750	178180	194870	285370	281800	224890	101150	98345	127100	274180	79403	166340	161900	174770	208900	193540	262140	252640	260770	250580	148030	291020	143820
78226	72660	51034	116180	145630	75096	189260	211540	150710	112900	133420	73301	142500	87217	200780	238360	65535	219160	101950	38614	131450	150900	213440	115530	121920	82730	158510	126900	9021.1	23252	196540	64547	29562	44136	61285	121940	40077	62970	82849	51669	54057	146750	80168	133910	193800	85217	89579	196970	167830	115620
0	18865	60590	178890	36443	59603	173060	37068	113830	49084	123220	55400	51299	56669	78770	87991	63561	39783	30366	46385	95446	22101	72372	35892	27833	54304	53294	76015	11256	13932	67854	0	45844	22335	48066	82393	0	28084	32450	100510	61205	0	94180	9802.1	0	121520	56220	66030	69993	61142
29924	0	73069	0	47311	24367	0	45251	0	24202	71524	53963	0	0	32386	37875	0	67037	0	64666	36178	108020	43919	47663	49128	0	0	0	0	0	60953	0	54782	60163	50571	112660	27576	0	73887	0	0	63896	0	0	0	67270	31708	38511	0	0
388860	370130	379760	341990	410870	352170	386620	388350	419480	391000	391680	378650	391390	417670	465540	451550	423780	471550	367700	424900	377020	497760	424370	406850	422820	378940	455140	391800	403690	375130	389420	377050	412620	393020	346750	368060	448120	383920	369760	350480	388100	322600	374740	420040	307680	384290	345370	357640	377990	413110
4384300	5824200	9090700	5980500	4822900	5047900	5551100	7883900	3902400	5480200	6408200	7245300	6339400	7114100	6070800	6141700	5516000	7416100	5723900	6803600	8039100	7550700	7060200	5006500	3777400	7915100	7524800	6684900	6977200	6389700	8295400	9446000	7250400	9004100	6961300	7819300	9622300	6759000	7652500	6105000	7997300	7188300	10807000	11046000	4234900	9520700	7975600	9925100	8308200	6919800
338680	571720	903440	476640	627420	494060	852160	776070	844970	268950	712710	769600	813990	633820	707750	284340	653500	600950	798390	324850	705510	657390	551020	291000	644630	921090	700070	178490	515240	732350	566530	1090400	972160	1095500	890850	799420	413510	732430	686070	748710	801620	709690	1013000	1013200	1266600	1015600	1244500	937700	736170	562330
117450	170160	53914	94697	141690	140450	78998	149400	189930	121980	127270	218260	61107	52470	81448	156690	127590	181400	108410	139140	134490	103470	153160	99319	163240	105020	163350	121230	118520	97554	152980	80344	137870	165410	82823	278170	125490	92456	205420	161590	97950	130410	146900	123780	87840	181920	120970	196160	156250	130650
139840	195320	120980	204590	262170	263350	198210	232170	212800	205090	217620	187790	213030	227830	224770	61485	195990	238220	151640	241070	800570	173960	227970	173130	183960	199740	167540	124940	174130	123560	213500	221820	199790	197010	259170	265260	199770	121740	236530	189050	385360	170810	162140	175100	289460	225540	207360	131190	203240	157320
173420	292000	272320	239420	289900	218410	308670	289840	332820	364190	339240	295520	290600	318650	291670	348320	398730	371030	346340	263680	246020	277330	290050	304550	291080	324020	319050	293210	272560	306380	324950	288350	331270	300180	145910	305860	123770	195450	274330	312370	299290	267880	363600	345530	309670	172010	252930	287940	265200	302740
892090	771610	969030	699220	814000	786560	672600	699170	889140	852230	773850	787720	686270	517640	763590	931940	844540	836100	197580	781700	746290	951210	888810	820160	896470	355290	906720	707640	719920	534530	617750	511700	565410	433110	486180	596190	700640	710060	878960	839290	806920	733470	759000	742170	752510	731670	649570	680620	474490	315270
0	0	0	0	0	0	0	0	0	0	0	0	0	0	0	0	0	0	0	0	0	0	0	0	0	0	0	0	0	0	0	0	0	0	0	0	0	0	0	0	0	0	0	0	0	0	0	0	0	0
939140	848950	809730	993570	687610	842370	863720	798410	974600	812310	1073100	1153800	1295400	676610	1100700	1198200	820090	1092400	897780	941800	883100	827780	938520	566480	766900	1090600	1023700	821980	753730	1003000	976380	975420	874580	786920	1056800	1123700	982480	918000	1071400	847090	881850	879310	1024000	1015000	993490	1024900	888120	844390	1000500	881430
342470	137950	410280	497550	380730	239700	438580	394000	425540	364900	438230	516100	358560	373550	272040	442580	189950	409840	417180	456830	451840	487740	501900	453380	404340	352260	477800	323540	366010	299740	295400	320430	373860	417140	311650	329900	408610	363840	412670	336710	336130	380880	370190	351640	345550	474030	428690	491670	354660	337470
8560800	8739100	9264600	8654300	8281700	8424000	8505100	9583400	9577100	10360000	9859400	10038000	8152000	9973300	10307000	9902500	10339000	10823000	9950200	10398000	10825000	10560000	6610900	11384000	10120000	10015000	10685000	8345900	8250400	9384900	7552100	8981100	8694600	8534800	11683000	9100100	9607800	9493500	9803100	9157800	9278900	9357400	9528400	9894600	10386000	10030000	8854700	8689100	8581600	7968200
0	0	0	0	0	0	0	0	0	0	0	0	0	0	0	0	0	0	0	0	0	0	0	0	0	0	0	0	0	0	0	0	0	0	0	0	0	0	0	0	0	0	0	0	0	0	0	0	0	0
0	0	0	0	0	0	0	0	0	0	0	0	0	0	0	0	0	0	0	0	0	0	0	127160	0	0	0	0	0	0	0	0	0	0	0	0	0	0	0	0	0	0	0	0	0	0	0	0	0	0
908010	189680	884240	959580	840350	744770	1043700	857770	1011500	1056600	1085400	1123000	1205000	1115200	1104700	1137100	1037400	1145800	808430	977420	1031000	1187400	963700	721790	1179300	1143300	1277400	855560	1145100	1043100	1016400	1258600	991610	1021400	1061400	995040	1100100	1141200	1007100	1090400	1083700	1015100	1060900	1196700	925560	1231300	1006400	1114700	1151000	1020400
8274300	8927300	9318900	9696700	9365100	9507000	9178700	9248000	9327500	9270300	9428400	9552500	9562100	9464100	9403000	10009000	9968500	9656600	9757200	9032500	10256000	8728100	9130100	9449000	9903600	9333800	10310000	10252000	9809700	10066000	9831600	9233500	9526900	9172300	9341400	9510800	10105000	9968000	9900800	9972400	9821600	9056000	10414000	9547100	10154000	10200000	9607000	9709500	9504600	8877600
72784000	77545000	80927000	80086000	76048000	76205000	82575000	79477000	82424000	86476000	83364000	84484000	91111000	92361000	87757000	90645000	86291000	89654000	80239000	75548000	81932000	75411000	76594000	82036000	92973000	91410000	90011000	83936000	83562000	84772000	90602000	85483000	87845000	90955000	94479000	93717000	85506000	86329000	86435000	94111000	89554000	86901000	98174000	92054000	91892000	88560000	85673000	85935000	87338000	87522000
0	0	0	0	0	0	0	0	0	0	0	0	0	0	0	0	0	0	0	0	0	0	0	0	0	0	0	0	0	0	0	0	0	0	0	0	0	0	0	0	0	0	0	0	0	0	0	0	0	0
93410	47939	159930	126420	64038	103360	0	119610	22152	145580	113180	38362	81133	115530	70435	213530	136920	391830	97840	0	0	58508	90358	0	177240	109980	90784	140230	0	90307	71256	114520	0	54309	110860	36389	0	132880	0	132700	0	157440	0	47616	0	73297	79773	113020	63324	65684
70698	127490	136120	165270	143060	153770	145940	90757	137260	140980	141640	147210	119180	143560	162870	210430	215810	196030	132280	144380	157390	144520	156160	153170	158460	138610	150100	201320	182730	216270	156830	151490	143830	133410	119530	97455	167230	132030	125830	145090	169780	166420	121140	91772	83819	117470	124450	106430	133140	146740
16954000	18509000	20217000	21323000	21585000	21049000	21284000	21074000	21047000	23091000	18335000	21378000	21429000	21827000	21704000	25390000	21832000	21222000	19667000	18138000	19522000	20587000	18511000	19422000	25626000	23356000	23815000	23720000	23733000	22555000	22241000	20205000	19345000	16483000	17538000	17838000	21291000	21527000	21302000	22925000	19032000	21623000	20232000	18298000	19200000	19926000	20745000	20208000	20757000	19728000
89629	69953	234250	112950	96770	75531	90586	47865	90329	109630	83372	212760	57630	4421	58878	0	0	0	231730	62362	56390	25278	49196	47167	80868	0	34021	117880	110000	102920	23969	0	21387	0	0	0	0	76965	37673	97362	107040	59584	378010	89774	42602	0	0	0	144980	0
946850	1079300	1091800	956380	876920	844760	896790	886550	814770	1016600	921980	916340	911570	822260	782390	746460	744680	857580	907460	859120	845780	953030	910160	912270	959380	1091500	943640	1030300	1074200	1031100	920740	1012200	1002000	742200	901710	836160	965070	1040800	1121500	1081200	1039200	1047500	1265600	1195100	1236200	1118900	1176400	1174500	990310	933200
346000	396210	461850	382830	382650	423330	393120	344680	396270	413180	521350	365540	396360	387110	401700	380730	390380	624990	418560	401120	441720	332140	571500	234570	442240	462240	496950	259240	392170	464950	409100	371660	476470	431300	450800	463490	423460	410240	216420	477020	441620	488630	521570	352490	597870	517770	423090	492610	382150	329150
18820	25683	36962	19291	40451	0	14707	0	12641	34317	44538	46229	0	0	36262	23262	39434	0	0	0	6056.9	11832	24731	23528	18358	38774	0	23276	9650.1	0	0	46776	15651	17305	12011	0	35490	0	0	0	2664	31874	28175	19458	0	0	0	20005	42983	28769
0	0	0	0	0	0	0	0	0	0	0	0	0	0	0	0	0	0	0	0	0	0	0	0	0	0	0	0	0	0	0	0	0	0	0	0	0	0	0	0	0	0	0	0	0	0	0	0	0	0
2426900	2552500	2525200	2598300	2650400	2514000	3028200	2125400	2605700	3017800	2077600	2710000	3322800	3017100	2863100	3154600	2338200	2792800	2646000	2365200	2648900	2490800	2761100	3243900	2635800	2685500	2857300	3070100	2730600	2387400	3006900	3187100	2793400	1915100	2939800	3073200	2359200	2632600	3039300	2585600	2313400	2957800	2682300	2520600	3157200	2434000	2891000	3292200	2753300	2863100
0	0	0	0	0	0	0	0	0	0	0	0	0	0	0	0	0	0	0	0	0	0	0	0	0	0	0	0	0	0	0	0	0	0	0	0	0	0	0	0	0	0	0	0	0	0	0	0	0	0
148370	216530	173190	212890	189860	113650	165550	189960	247470	120060	113930	259530	200520	198190	158630	221640	266030	107070	190820	164660	85468	217440	242240	227830	179270	191460	124960	114190	210660	55007	157950	215710	182450	192760	158700	291800	178940	323430	194680	156650	206420	239440	156460	158460	167900	135230	132850	150480	174300	183650
261650	259060	312650	290240	260280	208300	294730	392650	79105	36517	0	360490	365120	58332	340250	400450	0	403920	0	726170	216870	372700	367280	287690	360290	26551	361520	289440	284280	361740	250990	30412	280410	246540	268380	277750	69740	329170	356290	328970	226530	55159	263530	60594	228110	256010	208310	0	219690	256200
0	0	0	0	0	0	0	0	0	0	0	0	0	0	0	0	0	0	0	0	0	0	0	0	0	0	0	0	0	0	0	0	0	0	0	0	0	0	0	0	0	0	0	0	0	0	0	0	0	0
4625300	5592800	5708600	5956700	6389000	6145300	5714900	5631100	5861200	6089500	5979900	6385200	5921400	5347900	5559400	5255600	5417000	5921300	5255200	5085600	4758500	5110300	5259800	5662000	5650200	5310300	5709300	5443900	5651600	6411000	5988500	6290900	5626500	4917800	6229200	5891600	5833000	6043900	5263700	5063800	5878900	5613100	6310700	6255900	5925500	6258200	5949500	5779200	5702800	5782100
457810	432600	568770	406460	407390	546420	644520	481280	620490	477440	563460	562240	509240	190850	551300	754500	744640	678970	495680	576390	652030	593930	625050	563660	679600	712970	687430	597780	533310	626440	638340	375800	602470	528930	510830	488580	523470	601570	553260	132770	532940	585490	665010	614060	685710	526550	578390	511000	157140	549250
831130	855990	893920	957110	927120	808900	906920	1015200	1063500	1023300	825330	1223300	1101000	1042600	1030500	1200600	1145400	1110800	845630	885050	1161100	1024900	1228800	1022100	1028900	1188900	1059300	968170	987730	988690	995030	879830	1097600	901440	900110	1104800	952220	1006100	1081500	1290400	1129500	998880	1082000	1010100	1177700	961200	971930	938640	1018200	1037200
5228300	6032600	6027500	5843800	5592100	5812600	6364400	6282600	6696000	6226800	6229300	6261800	6714400	6630500	6610200	6489700	6218000	6649400	6457300	6085600	6936700	6311600	6496100	6571100	6617100	6375200	6823800	6221300	6015300	6107400	6287800	6106200	6037300	5945500	5781000	5978200	6540500	6740700	6670000	6124900	6244600	5864100	6472900	6455600	6656700	6423200	6511900	6684100	5873300	6032500
166040	220310	227080	46227	139000	154130	190120	179410	92893	192440	235830	118780	334300	279760	198110	225770	236580	338110	169370	231550	207060	256860	207940	178330	131190	194770	314700	179540	0	436390	206950	309180	110860	202890	145880	36547	164930	115960	174650	251830	199920	194660	160040	127010	78549	117520	226650	165440	179130	178890
554330	523840	548630	552490	593760	610860	481650	529340	555250	611990	490280	522910	629110	565360	552300	657490	646010	669170	701810	819370	766890	757500	651630	709840	580270	607670	609670	636490	601680	563680	634180	528020	613790	578730	496760	586820	589500	449680	663950	609780	655880	667510	586080	588300	545240	509100	574110	605960	637890	526160
321530	197240	233670	322650	183410	150490	128390	218690	169370	196400	187940	235000	164430	225420	210260	244910	256420	95141	194810	222780	258780	200650	111260	146290	167670	165770	162500	288390	210940	201580	288560	232930	200780	350730	112190	177090	197410	227660	205900	142010	149130	223470	106270	187540	191830	223710	207950	111590	258820	175280
0	0	0	0	0	0	0	0	0	0	0	0	0	0	0	23965	0	0	39378	41641	70853	0	0	0	0	0	0	0	0	0	0	0	0	0	0	0	0	0	0	0	0	0	0	0	0	0	0	0	0	41285
52066	71258	108490	73650	39561	104660	38178	29795	132230	63770	80585	42437	22917	42938	44408	171710	197670	18096	58944	112440	43065	53869	170900	96244	25576	60477	37533	71562	45205	140990	64877	49219	131990	27102	118290	55623	39042	152600	28476	79669	77166	68454	155680	59667	146720	41650	34969	45098	59483	92743
0	16586	0	0	12197	0	0	17891	17645	0	0	0	13796	0	0	0	0	0	57894	0	0	5306.2	20560	11135	0	0	34403	14452	0	12740	0	0	0	0	0	0	0	0	0	0	0	7305.5	0	0	0	0	0	0	0	0
10874000	11748000	11703000	11592000	11191000	10670000	11149000	10496000	11608000	11480000	10734000	11851000	12503000	12046000	11806000	11700000	11474000	12008000	12861000	12535000	12645000	11259000	10976000	11475000	12118000	11871000	11535000	11976000	12342000	12110000	12555000	11976000	11799000	11129000	12255000	11209000	12206000	12123000	12171000	12329000	12779000	12024000	11776000	10639000	11521000	12519000	11631000	10959000	11962000	12553000
7845000	8792200	8758200	9112900	8588000	8788300	8721300	8918800	9168200	8777400	8522500	8859800	9599200	9332300	9317200	9657000	9371900	9664700	9805600	9162600	9436500	8645400	8770800	9527500	9369900	9200400	9535200	8802800	8774800	9002400	9050100	8841000	9267900	8304800	8678500	8913900	9336700	9176900	9519200	8948500	8973400	8767400	9328600	9026300	9289600	9140000	8704900	9317300	9059300	8795000
3587100	3882500	4095000	4320400	3930500	4044800	3764300	3554600	3720400	3615400	3673900	3583600	4052500	3888100	4100700	4462200	4036100	4200400	4173800	3879400	4017000	3947600	3867900	3926800	4183000	4264400	4236800	4196000	4209000	4103900	4093100	3684100	3895000	3779200	3662800	3600700	3929300	3867800	4358900	4327400	4032000	3975400	3961900	3677400	3750700	4128100	3723800	3946700	3779500	3697200
933580	982610	1010900	859460	895320	909530	963690	1078500	1057600	1090700	1028500	978410	1054700	1074800	1027200	919760	978110	802410	981830	895170	1029900	938790	980220	675980	1197300	1121400	1062700	966170	866540	933240	1094300	1071900	935040	1106500	971850	1048300	1129500	1000500	989760	1118700	1025000	858430	1114100	1072900	1132200	1050100	1018000	1025400	975660	903540
0	0	0	147230	0	0	0	0	170370	0	0	0	0	267540	0	0	0	247170	0	0	0	0	0	0	347370	218420	0	0	0	492310	333870	0	277190	0	0	0	0	0	0	261970	2225900	0	889190	312850	0	153870	246480	212990	167470	297670
78150	45966	59400	35795	89012	47082	45578	39815	89946	21339	80545	53392	31919	59583	45007	92518	0	80678	23420	45957	0	58478	119860	40429	103170	32192	35168	75469	64213	64796	42019	121980	123590	47697	0	21572	0	65242	66797	21411	65100	47476	107010	49544	48419	107920	39487	86005	68193	34096
664230	984480	872840	726430	765010	911400	947850	928860	1053100	1019100	1043600	1072900	1022900	1052100	785490	1101800	1250100	1309900	1086700	892040	938470	939680	1157800	981500	955970	1049900	1347300	379540	831300	365480	745300	750290	1013300	1046100	715020	1304600	696500	813210	647600	775220	949700	762320	1084900	1103100	1304000	836090	743900	1153900	1081300	721940
0	66062	33855	65726	15987	6310	0	55049	27046	104450	44993	0	53068	47373	8305.3	77820	138130	41221	0	104070	133190	55316	85846	32967	0	61186	116720	74752	57671	10313	21935	20376	0	0	0	6415.4	28538	27677	14472	88652	33623	0	30579	19774	96870	18897	11693	0	28016	0
261770	344800	374340	462470	374930	415970	388490	359950	384830	411430	337650	339230	378530	272120	304430	417100	414900	433250	342480	490110	381390	317090	366710	352120	410340	407990	366800	364490	279750	387300	351390	320410	384220	384370	308650	348760	257490	303540	374860	352320	369200	428400	256350	236790	338200	307850	358290	387260	266800	353630
1281700	1453400	1559400	1250100	1357800	1295200	1582600	1531300	1571300	1434500	1335800	1494100	1694400	1549700	1716300	1445000	1455000	1524800	1631400	1683700	1651600	1545300	1637900	1587400	1758200	1704000	1721900	1288000	1365300	1283700	1468800	1498100	1393800	1327400	1329000	1402000	1413400	1568800	1548700	1445300	1443800	1462400	1585300	1517000	1594200	1433700	1469200	1426800	1443800	1516800
483380	570170	528950	581840	596180	524160	486380	553020	607190	542080	543100	550540	561090	514510	522160	621170	590240	587920	525110	542850	352230	551420	520080	510480	532810	571980	549200	577730	541660	513450	493950	500070	533670	497680	543250	516540	559010	517580	543840	584690	586810	520350	601750	522980	571360	551890	560520	412630	514890	540790
852640	945260	902520	907850	887270	955340	1058700	1029900	987290	1069300	1020400	1093500	1068200	934420	945180	1104100	1022800	1031800	1032900	951970	980350	817300	821740	769090	897310	956380	1004100	1003600	946830	990330	1014500	844390	983550	936170	853830	894210	901870	1019400	849880	1048100	884590	1020900	943410	864100	958210	857840	895110	990150	923970	903160
462550	550750	565530	540240	521360	599930	566920	506120	551290	598850	607320	589550	495240	466400	453620	638630	528090	563540	609480	560370	622340	534930	403790	529230	517360	529690	474690	534070	579560	517620	503690	483360	480810	439710	491700	450640	590120	537010	605680	536740	541250	591510	498430	504230	515510	523530	465680	531170	551010	548880
14107	13908	71890	44126	16793	7571.2	36773	25540	45629	8839.4	0	21083	100180	57916	0	0	33796	20234	23877	37593	25328	35422	62313	48485	0	20845	0	10330	50102	10840	26615	26707	0	0	21668	34057	24089	23096	14826	0	0	26472	6980.8	8151.5	19603	25051	46568	39748	28372	0
0	0	0	0	0	0	0	0	0	0	0	0	0	0	0	0	0	0	0	0	0	0	0	0	0	0	0	0	0	0	0	0	0	0	0	0	0	0	0	0	0	0	0	0	0	0	0	0	0	0
373430	445360	447800	536890	462070	476530	490630	509220	542770	477870	507410	289170	500090	438280	537820	538490	493280	537790	579590	545550	471520	506550	532690	487090	468230	503440	509330	470980	450460	523720	471630	479170	500670	449050	486380	499080	520660	471840	546060	506660	481790	499470	535370	514220	506720	289610	470250	509080	480160	480250
715030	864380	894510	727220	768860	818760	865500	835530	861010	444970	933460	821840	959970	666480	830720	799600	990820	934610	974340	813290	972430	880810	846590	1033100	961640	813750	1029800	760580	754080	748250	928890	879320	844940	802740	810120	842200	854400	828260	973930	897920	807960	902680	903740	982000	880170	768110	882550	800560	886830	739500
598370	815660	812600	864270	739530	804410	832830	840690	880660	778680	838890	792030	800310	934920	906760	1017700	906990	947040	820610	793330	892600	875660	911380	921610	965550	833630	911060	881760	907150	829040	851410	824140	874970	690120	818520	751080	879080	807360	850490	858940	806040	821080	969100	869720	978570	840780	860630	839020	764550	829810
124660	96345	45717	95680	160150	108380	59979	188940	107690	92719	0	97021	92448	66088	0	0	0	0	0	31760	93476	165230	140790	94435	0	126890	46957	65724	0	4044.5	50512	93195	65899	191680	0	95602	110160	127130	121210	106060	0	88268	157270	99549	33508	0	0	67987	100330	96304
122060	160230	144460	11984	154130	120510	166150	154760	155960	166650	112670	142130	117620	100470	127810	164260	170800	147490	106990	141070	66857	156940	146190	129870	29010	19695	89882	165910	128260	85836	101500	135090	93032	85521	111170	120000	154860	119420	132120	64357	113320	50819	102810	84899	122920	161550	131970	32958	146370	138820
209530	226780	261710	185130	190750	237730	291230	225120	223240	236390	231020	140180	320520	212300	255460	261090	273030	196420	273830	258930	291290	292410	229240	191530	239370	257800	312840	280290	230180	284360	245790	205820	231790	136620	155010	174120	137640	282480	228120	256530	182690	230410	183980	143770	291320	239910	235830	148790	182550	227290
0	103510	131930	1409600	307460	954600	72574	152980	140270	175930	43795	551790	284040	458880	593330	80270	183770	227750	0	0	0	495820	448550	56704	315710	154230	624820	37227	472360	283960	340240	863970	323690	436640	517320	945480	509400	436790	343370	386500	927090	246220	848320	815950	630600	572400	54745	8042.7	384680	407060
58129	21611	0	70490	37377	67613	27063	0	0	0	0	0	81187	61725	81930	0	85685	97923	229040	0	60720	67609	0	0	0	72597	47686	47571	63189	74309	0	0	37182	57723	30946	35021	40130	83636	37883	67881	98354	42619	0	64025	0	61142	82144	0	47363	68329
174250	268710	116310	151500	217870	208510	280170	315610	329270	298610	279280	223940	270310	193530	313950	338920	228590	225870	311770	241030	106330	341890	387530	270790	256990	209700	237580	194520	137100	186990	162240	217610	244620	141730	248110	159220	216890	200120	256880	228940	261230	207820	219160	208120	288980	266110	225500	311650	246670	220690
375630	342360	369460	327600	212940	355280	260580	235200	418580	329940	387610	332570	386100	349820	228860	381080	410470	468030	349260	297090	387680	421870	214750	441060	438000	371330	386710	319390	346700	302210	336720	424000	413170	283230	336040	297070	424490	461540	411400	422590	432990	411220	574250	393040	289920	253320	498840	317260	215420	422470
108900	92923	101620	107400	93385	0	23813	36814	47342	33465	104430	24131	53588	62722	120700	176180	81334	111160	68833	31440	154150	46290	136330	82715	69967	119480	130900	91308	146650	41000	146140	130330	92762	77347	46167	79036	30282	23317	18749	99556	25390	56798	69592	55291	129020	51504	11651	79365	71771	142850
111160	207330	181400	183490	187290	173270	199760	186260	223940	219170	178210	185690	207140	284870	218050	159120	211990	293930	340870	222200	79929	202900	226360	249090	182470	185710	130560	211150	111550	57981	218360	157850	185610	120280	105340	158500	271290	150160	212640	199950	201640	201600	182770	218010	200180	170740	273180	217890	183050	209580
4352900	4471700	4459300	4767700	4387900	4384200	4551900	4910100	4809300	4887500	4440600	4672700	5055600	5094200	5109900	4871600	4640700	4778200	5087700	4192400	4125300	3983100	4114200	4317400	4980200	5062100	5103400	4655100	4504700	4946100	4944100	4783600	4700700	4676600	4871400	5145100	5142200	5355200	5502400	5079500	5064100	4868800	5578600	5428700	5377800	5040600	5248100	5092800	4986800	4457400
0	0	28303	0	0	0	0	0	0	0	20500	0	0	0	39075	0	81230	60894	0	0	0	0	0	0	0	49818	0	21626	52011	0	0	0	0	0	0	16815	0	27911	0	0	27814	0	0	0	0	0	0	0	0	0
1240400	1358600	1335400	1341100	1323200	1361800	1358900	1277300	1281100	1336900	1330200	1389200	1399500	1288700	1426600	1468100	1445000	1438900	1359400	1199600	1401900	1321300	1344500	1261400	1360300	1420500	1480700	1343000	1333200	1327500	1208700	1190100	1317800	1288500	1188500	1301400	1316200	1409200	1448700	1433200	1272200	1528300	1429800	1406500	1547800	1311700	1201900	1368000	1239700	1202300
0	60012	21847	31975	31816	0	29406	11174	16782	21282	9660.1	23529	42559	7199.9	39888	41984	55131	15244	16527	21619	28956	19221	63195	66067	21740	35805	23497	15510	43625	48155	24126	64376	24896	11504	39625	0	41165	47570	60605	40954	0	24084	23133	37769	14230	46136	20861	26416	0	18143
99950000	102960000	107330000	121800000	84170000	101120000	81250000	88695000	121760000	71566000	84849000	88391000	119920000	129980000	108250000	121910000	93023000	80498000	132350000	115470000	131780000	112320000	107830000	123330000	121920000	137620000	104200000	128000000	115560000	126600000	121190000	98461000	124270000	110410000	129600000	145510000	121240000	114740000	113910000	113680000	98264000	118960000	141910000	97785000	149350000	108050000	109650000	107580000	100390000	114040000
446890	548820	586480	520580	614700	550900	570970	522080	587740	567740	548730	590410	710060	635650	609500	671690	566100	495840	683760	642550	571900	595030	586880	575680	616680	517280	588260	598210	481180	545460	586090	632650	574270	570570	568930	501220	594770	689400	621790	592930	549310	608760	708730	659710	442050	575280	671910	637720	684810	532540
2173100	3058600	2445700	2537000	2746300	2554300	2446600	2577300	1732400	2227200	2306000	2296400	2702700	2491100	1596900	2622600	1647900	2328100	2978300	4390600	2819500	2635200	2493200	2483200	2697000	2903800	2368400	2479000	2458900	2549800	2310400	2561300	2477800	2541400	2161000	2894600	1570800	2707800	2824900	2133900	2491100	2466900	2331300	2461500	2538000	2131200	2087900	2255300	2295000	1668000
3848900	4288400	4069000	4223600	4078600	4063900	4070400	4309000	4381500	4298600	3921800	4541400	4675300	4486100	4633100	4545700	4326200	4505700	4415400	4484200	4418600	3772700	4225800	4494500	4745900	4965100	4664600	4138100	4097000	4416400	4489600	4273600	4497600	4107100	4200500	4337600	4600500	4732000	5089700	4495000	4341300	4288100	4894900	4704300	4863100	4602100	4477200	4665800	4201300	4112900
4996100	5498500	5931600	5567600	5835700	5609200	5641700	5709300	5968700	5903000	6116600	6128800	5856800	5532500	5148300	6164600	6026400	6468800	6156100	5765200	6317400	5264400	5677300	5908100	5403300	5612000	5739600	5753100	5687000	5975800	5907800	5503100	5447300	5303600	5594400	5823700	5934700	6216700	6353800	6272000	5674100	5943400	5690900	5668900	6145500	5834000	5647800	5820900	5591300	5340600
327030	457940	337450	449170	460770	1087600	486110	529470	348810	392250	378520	303670	401210	358510	463330	587150	553050	156170	410150	511010	600070	403020	398230	451620	423320	577210	543970	382470	364510	489670	451190	375260	499310	252740	340860	454880	462770	271740	499640	387660	374520	213040	470070	480670	547290	364230	330200	364390	357910	438140
0	0	0	0	0	0	0	0	0	0	0	0	0	0	0	0	0	0	0	0	0	0	0	0	0	0	0	0	0	0	0	0	0	0	0	0	0	0	0	0	0	0	0	0	0	0	0	0	0	0
798350	918060	877160	919070	872670	886470	878740	808180	862860	824470	862230	848920	824620	886110	929260	815670	801120	929960	795100	691550	769930	912790	925950	761270	766610	797790	844720	908990	866170	762440	851760	757020	732110	691090	688220	647450	1076000	789130	841530	659330	826300	772120	821760	613560	814210	784110	762850	766560	880790	758220
270370000	309100000	301500000	309080000	285290000	313650000	321600000	305770000	304740000	317670000	314120000	317290000	377060000	337580000	350190000	323210000	305660000	333770000	320580000	310960000	292530000	306900000	294760000	296420000	349430000	333240000	337690000	330080000	347850000	330390000	359100000	337390000	340390000	336080000	315680000	346780000	361410000	358340000	372790000	339400000	340260000	324800000	421460000	358710000	395190000	346650000	346500000	359480000	334110000	319770000
77985	178600	93113	236300	268820	324530	222010	174690	271760	221590	250150	244010	200890	207410	253080	259630	251840	226720	229000	219540	262770	179350	270180	67611	178660	261870	213960	214880	230750	260120	218170	241080	235230	150470	185740	227790	116240	204520	208590	88319	240490	161140	182480	211130	247520	261950	258270	242870	265730	155630
0	0	0	0	0	0	0	0	0	0	0	0	0	0	0	0	0	0	0	0	0	0	0	0	0	0	0	0	0	0	0	0	0	0	0	0	0	0	0	0	0	0	0	0	0	0	0	0	0	0
3482000	3441800	2279700	3004800	3267300	3155700	2957800	3059500	2860300	3340100	3303100	3314000	3530700	3878800	3775600	2677000	2951500	3059800	2538700	3202800	2164400	3607800	2700900	3479600	3271900	3080400	2894000	3834600	4218200	4356200	3494300	4057100	3944000	4731300	4877500	5190400	3225000	4092600	3750100	3560400	3387400	3563900	4603000	3842700	3824400	5316600	4830400	4216200	3704100	4030700
270850	40733	249250	132960	231810	269790	395340	312460	270790	367660	121210	241730	317330	297090	59264	219730	246570	0	408170	232190	270430	237190	206110	280320	274370	158070	306430	276180	396600	219560	233580	302660	246030	250530	261270	79365	281380	321340	289840	411970	223310	284550	257390	203070	197620	330130	161150	225860	255020	324460
266650	628590	474770	326020	402260	262210	380110	725930	586070	520570	683180	466560	683920	274620	617120	643950	558380	378800	386100	114630	338490	285270	707110	348830	745040	469800	703740	425560	334960	338230	507060	497430	782050	356340	383600	300350	533550	671970	255780	457260	373030	589760	809510	315340	204820	652410	547930	837980	490480	298890
1027600	1124500	1026500	1115400	1051200	1016800	983690	959720	1041900	1029800	1050500	1135900	1231500	1117600	1121400	1208300	1145400	1133200	1367600	1252900	1366000	1139100	1165000	1241200	1124400	1162300	1184400	1055700	1068600	1178900	1023000	1093100	1005200	1020900	986310	949600	1143400	1279200	1240100	1251100	1146100	1050900	864160	964130	935150	976430	961290	891820	1052900	1068100
108380	152920	185180	129680	94442	238050	132210	270630	216230	83633	181160	35820	165650	213520	58595	218270	87314	129170	168190	90965	133290	92602	211490	241950	191060	198640	173730	197690	137510	166970	120900	172980	156710	161100	174670	178080	182930	169240	262590	179490	162320	120000	119110	82850	247480	149720	170210	219760	128400	167310
1292900	1503900	1293600	1369000	1185000	1402400	1428900	870420	1455300	1528000	1464700	1361000	1581300	1535800	1628200	1649400	1629200	1635500	1570700	1463800	1544000	1422700	1352200	1387900	1390400	1614000	1615600	1525700	1592900	1353100	1631800	1636200	1663600	1784000	1437100	1809600	1646000	1729600	1357300	1711700	1416000	1547200	2075500	1810900	2249300	1911200	1585900	1664900	1401200	1564400
21381000	23202000	24924000	23478000	21220000	23412000	26979000	26114000	25072000	25665000	23749000	25864000	29136000	26033000	28019000	26367000	27577000	28502000	24736000	27532000	29049000	24676000	26515000	26786000	27081000	27809000	25837000	23575000	22596000	25330000	31278000	29381000	30255000	27288000	26611000	27570000	22205000	24310000	25112000	24468000	23025000	22380000	33229000	31558000	33452000	29843000	28617000	26971000	28648000	29010000
6291000	8100600	7759900	7648700	6614700	8379600	8488900	8406500	7953400	8905700	9196600	7925300	7007600	6866600	8268200	9402500	7869200	9370100	8119600	7526400	8714100	7327500	7126300	7312200	9087000	8062000	9010100	10567000	10081000	8516700	9089100	8032000	9175300	9834400	7654900	8306700	9126000	9253300	9344700	7945300	7913500	7952700	7545800	7658800	9376100	8495100	7367300	8116200	8741900	7902500
1124200	1847000	1719600	1518700	1578800	211830	1189800	1436800	1372900	1431300	1278300	1421400	1284600	1095400	1446400	1392700	1462100	1047600	2030300	1644000	1378900	1457400	1226100	1380100	1405300	1440400	1314400	1552900	1520900	1497500	1450800	1394800	1362600	1698000	1559300	1589400	1575000	1492500	1545700	1505700	1604600	1557700	1448100	926810	1302300	552460	1542900	1586200	1309100	987610
860020	880730	610310	747990	1016700	584170	855730	744780	707070	959880	616920	686230	789270	1060000	838320	918250	1178500	1155000	450900	752850	712020	709010	697700	660720	1022800	742010	911570	977990	675920	1033600	869400	680290	876070	873380	778520	1068400	843830	883690	833860	696040	896390	814460	898350	1041500	667870	903840	580530	877750	744020	966120
4106400	4438500	4363000	4583600	4325700	4617200	4501800	4282400	4748600	4575800	4698300	4703900	4777200	4384600	4886500	4931300	4587100	5051700	4694900	4986100	4434400	3948500	4166100	4218600	4800000	4404800	4662000	4523000	4629300	4749700	4774700	4691400	4557300	4483600	4449300	4526700	5258400	5003100	5164300	4919100	4719000	4543800	4828300	4305000	4898900	4601200	4459000	4480500	4429000	4303300
0	0	426900	0	165780	104300	423600	0	0	0	0	0	0	0	0	0	0	0	469890	222040	0	153830	0	0	159980	187550	0	860510	387430	0	617660	552500	0	259020	288790	0	255160	0	0	441880	596670	0	0	0	0	1055500	267250	0	458730	127860
959930	922860	832270	865330	890270	883280	999750	848440	603520	872460	788630	756210	769290	653480	525150	269150	258700	320920	1035900	662930	591890	686490	613120	381220	837230	526600	582630	1031200	951180	910250	917970	782690	817760	881190	1198600	958790	813290	888980	764770	758970	888850	679380	880250	868850	562330	900340	889300	902140	1210500	942530
0	0	0	0	0	0	0	0	0	0	0	0	0	0	0	0	0	0	0	0	0	0	0	0	0	0	0	0	0	0	0	0	0	0	0	0	0	0	0	0	0	0	0	0	0	0	0	0	0	0
663000	966670	1088200	983980	962150	908280	975100	941760	839430	881750	1017400	1026600	1141200	719120	1161600	930460	1115700	808960	931470	902740	749510	687290	658070	713000	1065400	876020	843830	915980	978090	704780	916210	922580	934990	854700	905480	861450	1054800	1082000	829020	943240	877780	1018400	815830	1059600	1099600	954400	679490	791190	915070	989110
939310	807120	659000	675020	773110	697730	1047900	784650	962540	1065800	1056200	996700	759900	1052600	600850	872720	901050	846400	881970	679260	926400	638520	1029000	919650	1101500	615880	1000100	488500	951300	1208500	858020	855020	871620	778790	691050	1353900	1006800	1017100	1016900	921950	996820	689560	876790	693480	750690	867490	708810	803580	829980	888310
2132200	2117900	2414400	1706500	1624400	2094600	2126600	2111800	1931100	2006900	2118000	1997500	2778300	2644400	2715600	2676500	2662500	2662400	1554000	1962900	2198800	2038800	2082200	2270600	2402800	2451000	2424400	2241500	2344500	2249300	2257800	1741100	2248900	1922200	1995700	1980900	2177800	2189000	2575800	2092700	2349200	2199900	2103400	1938000	2188400	2172600	2180000	2196700	2313700	2453900
227540	214110	211370	203930	166160	216710	242710	182070	193290	196010	186740	279990	271580	288440	270150	302160	263350	0	0	222050	80678	248450	233680	270320	294950	277620	293470	299510	282330	231440	0	142050	106470	243910	277370	194210	194390	259320	239450	242540	204280	232690	276990	193820	250730	242660	152960	199920	214080	153220
4889500	5794500	5765100	6125100	5336300	4776500	5695300	6084600	5440700	4713500	5837700	4818500	5365800	5772400	4918300	5456700	5380200	4986300	5509400	4884500	6015200	5494500	5118800	4985400	5135300	5516400	5524500	5538100	4754500	5212400	5712700	5082300	5025700	5615700	5567600	5607600	6764400	6626400	5621800	5960200	5219400	5845300	6905000	5660700	6013000	6168900	6002000	4830100	5993500	5431000
4122700	4783000	4729300	4797300	4653200	5076100	4755500	4402900	4742000	4774300	4617800	4694400	4853700	4891200	4724600	5442300	5011100	5375600	5003300	4499600	5080600	4520200	5007200	5074400	4964300	4920100	4962600	5056300	5085400	4856400	4878700	4703600	4964900	4603500	4428600	4788600	5073300	4945000	5082300	4122900	4632500	4452200	5058900	4814800	5100100	4876900	4780300	4958500	4617200	4604800
1781800	2083300	2088100	1984200	1886100	2080600	2046800	1972000	1953400	1854900	2097200	2210200	2240200	2019100	2089500	2252500	2375400	2350200	2290700	2060600	2185200	2074300	1964600	2093600	2215200	2200500	2294300	2199300	2222300	2154700	2372600	2164200	2288600	1779100	2007800	2203800	2122100	2225200	2045400	2227000	2149900	2114200	2193700	2131200	2356300	2158100	2165700	2282300	2091700	2026100
23122000	21642000	24496000	23535000	23105000	24202000	27850000	25359000	25802000	26959000	24019000	24091000	27684000	27070000	25990000	20716000	24610000	20868000	22704000	20531000	22113000	22519000	23518000	19745000	26048000	24274000	24198000	25616000	26630000	26951000	30105000	25063000	28773000	28926000	32279000	30180000	27978000	27578000	31457000	26774000	27699000	27986000	29927000	28852000	25574000	29349000	32809000	27050000	26788000	25980000
203320	196510	171990	242600	158930	197430	125600	196580	159560	193560	181910	173500	165710	168630	247760	222050	307740	240270	318840	311440	235890	244590	153790	213940	179070	193700	185510	161110	229250	220370	209910	143160	173460	211980	185280	151410	183940	201810	229490	155410	186580	243170	205900	213470	148350	135570	168980	153220	183310	224220
1274700	1418300	1391800	1421600	1512100	1434000	1450900	1423300	1424000	1575400	1482500	1620600	1479700	1519700	1446100	1504000	1389200	1642600	1592800	1533900	1636300	1475600	1222900	1499400	1578300	1539600	1384400	1452100	1476800	1420400	1420500	1481100	1451300	1457700	1382000	1510500	1602900	1614900	1594500	1549600	1440000	1458100	1557400	1343400	1447200	1520700	1475200	1298500	1420600	1503200
2761200	3148700	3144000	3185600	3149900	3003700	3195900	3101600	3347600	3207400	2817400	2954900	3143600	2980100	2984200	3203300	3096800	3311000	3144500	3155600	2972800	3019100	3010600	3264000	3179200	2847200	3416100	3201700	3155900	3254600	3372400	3135900	3036400	2915700	3055200	3268400	3370000	3096800	3367300	3334600	3221300	3238800	3314100	2992200	3494000	3366200	3037800	3261000	3248300	3028400
285090	375720	463150	405550	423660	423450	492800	442190	327830	380420	139750	402890	570430	392470	537220	571700	560070	511440	490320	423360	474550	434350	464880	337550	332110	581940	506150	556900	584970	558210	463180	586590	155380	498600	497330	554320	514350	441030	502820	515360	455520	500370	613030	458070	250030	412650	567390	547830	319670	472580
22740000	26072000	24979000	27541000	25705000	27961000	27140000	26105000	26381000	26304000	27200000	29113000	28780000	27582000	28317000	28441000	29481000	29992000	28970000	28664000	32675000	28789000	26414000	29507000	27363000	27471000	28197000	28763000	29559000	27661000	29458000	25585000	29937000	25753000	25857000	24376000	29170000	28065000	30076000	27711000	27893000	25545000	29394000	24905000	27303000	23442000	24168000	25794000	26602000	25697000
91065	162560	139100	73790	368750	393430	286830	437480	52047	107150	126070	0	166420	167220	26457	92731	108960	55553	62131	112090	742150	71360	426680	144020	72121	38367	21741	30998	84819	16349	22089	93150	0	26544	45442	103060	281320	132960	241230	102740	201800	196510	28524	116040	143190	93867	382810	239560	70240	75298
1023400	1247300	1460300	1470200	799140	777350	1447200	1010500	644590	438440	867440	1092400	1722700	664040	594640	686730	685350	700060	992910	1306300	1463600	890130	871270	741070	722680	1261200	286440	2197100	1545300	1365100	285600	975960	1470700	1085000	988530	1170600	1697600	764450	1111300	1226700	1484600	1219500	705600	544450	993880	481290	1320300	1266400	545210	1104600
0	0	0	0	0	0	0	0	0	0	0	0	0	0	0	0	0	0	0	0	0	0	0	0	0	0	0	0	0	0	0	0	0	0	0	0	0	0	0	0	0	0	0	0	0	0	0	0	0	0
85084	325400	382450	180470	350210	252700	182510	243090	295060	291240	282570	382430	41439	241530	227240	250140	242350	193030	216600	206440	222650	173860	293780	397510	242630	91045	210790	254480	261770	263600	193450	303270	130590	203060	196020	295450	348120	283480	264740	212320	53434	280490	203470	161360	204000	269850	176110	215450	199000	245430
584850	974770	794310	904150	871140	838640	774670	842600	849540	850910	852280	788410	916950	841570	806720	789070	793870	903700	900710	790110	826840	723530	736000	692910	459020	864570	847220	245790	828870	930210	942250	941770	692620	759020	769660	820000	805340	960980	742760	1034600	1043600	1002100	788710	806430	811020	825860	739130	784320	968990	884620
1340800	1210700	1490400	1534200	1354600	1475600	1558400	1420600	1436500	1183800	1472500	2007500	1399500	1685300	1515800	1744100	1661200	1613600	1627000	1537700	1656600	1541700	1634700	1777500	1590600	1229600	1668700	1735200	1654200	1488900	1748700	1763800	1829700	1465000	1312300	1475600	1393700	1561300	1702900	1271600	1527500	1447200	1523200	1283700	1746200	1529800	1803100	1773100	1448500	1539900
[truncated: 4,276 more rows]
[truncated: 23 more columns]

## Sheet: 2-50% in total, 4422 proteins
Supplemental Table S2-2. The 4422 proteins after the filtering of the MaxQuant results.
[truncated: 4,424 more rows]
[truncated: 23 more columns]
