# Supplementary material for: Differential proteomic analysis of mouse cerebrums with high-fat diet (HFD)-induced hyperlipidemia
Source: PeerJ. 2022 Aug 3;10:e13806. doi: 10.7717/peerj.13806 (PMC9356585; doi:10.7717/peerj.13806)
Supplement: Supplemental Information 4 [file peerj-10-13806-s004.xlsx]

## Sheet: Pearson correlation matrix
Supplemental Table S3. Pearson correlation analysis of the proteomic quantity data.
1) The log2 values of the quanties of the 4422 proteins (see Supplemental Table S2-2) were calculated. Then the Pearson's correlation coefficient was calculated for each pair of the 54 LC-MS/MS experiments (3 animal groups ´ 3 animals ´ 2 hemispheres ´ 3 LC-MS/MS technique replicates). The coefficents distributed in a range of 0.936-0.968. The cells filled with bright yellow are coefficients betw…
2) Row 5 and Column A: "C" stands for "control group", "M" for "model group" and "T" for "simvastatin-treated (SIM) group". The number that follows is the number of the animal, and then the "L" and "R" for left and right hemispheres, respectively. "R1", "R2" and "R3" after the second hyphen mark stand for the three LC-MS/MS replicate runs for each sample.
	C1-L-R1	C1-L-R2	C1-L-R3	C1-R-R1	C1-R-R2	C1-R-R3	C2-L-R1	C2-L-R2	C2-L-R3	C2-R-R1	C2-R-R2	C2-R-R3	C3-L-R1	C3-L-R2	C3-L-R3	C3-R-R1	C3-R-R2	C3-R-R3	M1-L-R1	M1-L-R2	M1-L-R3	M1-R-R1	M1-R-R2	M1-R-R3	M2-L-R1	M2-L-R2	M2-L-R3	M2-R-R1	M2-R-R2	M2-R-R3	M3-L-R1	M3-L-R2	M3-L-R3	M3-R-R1	M3-R-R2	M3-R-R3	T1-L-R1	T1-L-R2	T1-L-R3	T1-R-R1	T1-R-R2	T1-R-R3	T2-L-R1	T2-L-R2	T2-L-R3	T2-R-R1	T2-R-R2	T2-R-R3	T3-L-R1
C1-L-R1		0.964375	0.960479	0.962224	0.962032	0.960258	0.960077	0.961136	0.959469	0.962708	0.960838	0.957879	0.959396	0.958154	0.959861	0.955112	0.955151	0.954565	0.954081	0.948771	0.948408	0.954429	0.957429	0.956353	0.960782	0.958813	0.957116	0.963857	0.960468	0.963527	0.96267	0.95979	0.959186	0.959383	0.959488	0.95785	0.947754	0.946122	0.943417	0.95905	0.959339	0.959475	0.959027	0.955058	0.956731	0.957737	0.959835	0.957582	0.961351
C1-L-R2	0.964375		0.964424	0.959376	0.96466	0.959864	0.960012	0.964628	0.961299	0.961959	0.962457	0.958311	0.960741	0.957902	0.960237	0.956725	0.952058	0.956901	0.956711	0.952841	0.949602	0.956521	0.959963	0.954861	0.960222	0.958537	0.959462	0.962291	0.962312	0.960123	0.962091	0.96067	0.960614	0.958691	0.960468	0.960544	0.955005	0.952905	0.950074	0.960137	0.96001	0.959364	0.954559	0.955415	0.956118	0.958793	0.95748	0.959445	0.961288
C1-L-R3	0.960479	0.964424		0.957975	0.960635	0.959605	0.958025	0.959177	0.959789	0.959153	0.958009	0.956159	0.956324	0.957967	0.959346	0.95611	0.954958	0.954125	0.954552	0.949267	0.949242	0.95114	0.955461	0.955701	0.958396	0.956649	0.95572	0.962308	0.960165	0.961152	0.959286	0.959018	0.959892	0.956095	0.956544	0.957356	0.948426	0.947386	0.945833	0.959418	0.960358	0.95667	0.953915	0.953699	0.952802	0.95537	0.958471	0.954842	0.95837
C1-R-R1	0.962224	0.959376	0.957975		0.962873	0.960301	0.956078	0.957572	0.95852	0.961345	0.959957	0.956117	0.956089	0.955686	0.955017	0.955058	0.952342	0.954714	0.954435	0.946233	0.949349	0.955122	0.956124	0.955974	0.956253	0.957307	0.955316	0.960985	0.96027	0.960386	0.959999	0.958961	0.95994	0.957419	0.957837	0.958705	0.9469	0.943615	0.945274	0.960088	0.959608	0.956651	0.957041	0.956454	0.955403	0.955671	0.958698	0.957231	0.957727
C1-R-R2	0.962032	0.96466	0.960635	0.962873		0.965163	0.957562	0.962552	0.963709	0.962268	0.959469	0.95837	0.958689	0.957686	0.957106	0.958701	0.956709	0.957287	0.954509	0.948976	0.950432	0.956202	0.961348	0.956128	0.960926	0.960454	0.958715	0.962477	0.959347	0.96139	0.961449	0.960705	0.960396	0.960732	0.961492	0.962041	0.946642	0.942466	0.942584	0.961146	0.959895	0.960208	0.95863	0.955829	0.958295	0.959187	0.961789	0.961086	0.962014
C1-R-R3	0.960258	0.959864	0.959605	0.960301	0.965163		0.957708	0.960308	0.959182	0.960214	0.961978	0.958118	0.956751	0.956633	0.957596	0.958676	0.955716	0.957983	0.953133	0.95226	0.950875	0.955634	0.959469	0.955279	0.957987	0.956535	0.955201	0.958945	0.960795	0.95753	0.959491	0.957472	0.958544	0.957107	0.95645	0.958007	0.952301	0.951776	0.947865	0.958059	0.960817	0.958657	0.95391	0.955439	0.954923	0.957873	0.957673	0.958094	0.957495
C2-L-R1	0.960077	0.960012	0.958025	0.956078	0.957562	0.957708		0.965671	0.96547	0.96262	0.963397	0.960182	0.961005	0.954809	0.957433	0.952842	0.955095	0.956401	0.955348	0.947349	0.947538	0.954108	0.958155	0.951904	0.960075	0.957841	0.955304	0.958524	0.958952	0.957828	0.95864	0.958083	0.957832	0.957616	0.958337	0.956948	0.944044	0.94412	0.941364	0.958551	0.959103	0.957943	0.956779	0.954826	0.955052	0.957856	0.960214	0.956903	0.958757
C2-L-R2	0.961136	0.964628	0.959177	0.957572	0.962552	0.960308	0.965671		0.968019	0.964798	0.962816	0.962732	0.961618	0.959142	0.957517	0.95623	0.955108	0.958051	0.956271	0.951521	0.952576	0.958418	0.960448	0.958086	0.961253	0.958653	0.959505	0.962731	0.959592	0.958523	0.963623	0.961482	0.961767	0.958754	0.961759	0.958806	0.94443	0.940586	0.940037	0.959994	0.959572	0.957996	0.958602	0.959851	0.960536	0.959982	0.961602	0.96112	0.963823
C2-L-R3	0.959469	0.961299	0.959789	0.95852	0.963709	0.959182	0.96547	0.968019		0.964088	0.965791	0.963486	0.961753	0.959866	0.960672	0.95789	0.958184	0.959765	0.958112	0.952756	0.952728	0.957732	0.958208	0.960861	0.963551	0.962198	0.961754	0.960295	0.959453	0.960477	0.962509	0.962065	0.962243	0.95954	0.958752	0.961745	0.946923	0.945586	0.94297	0.958615	0.963063	0.96084	0.961478	0.960224	0.959783	0.961165	0.961936	0.960678	0.962136
C2-R-R1	0.962708	0.961959	0.959153	0.961345	0.962268	0.960214	0.96262	0.964798	0.964088		0.966269	0.963039	0.960803	0.955225	0.959402	0.958067	0.955784	0.958544	0.958278	0.952787	0.950864	0.956373	0.956976	0.955633	0.960191	0.95877	0.957825	0.96098	0.960733	0.959685	0.961024	0.957843	0.957408	0.958851	0.957794	0.958047	0.948945	0.945585	0.942464	0.95847	0.958866	0.958524	0.957502	0.959836	0.95772	0.958687	0.960985	0.959495	0.960021
C2-R-R2	0.960838	0.962457	0.958009	0.959957	0.959469	0.961978	0.963397	0.962816	0.965791	0.966269		0.962667	0.960592	0.956195	0.957697	0.956951	0.955456	0.958368	0.954776	0.950952	0.94876	0.9569	0.956391	0.954998	0.95962	0.961029	0.958569	0.958006	0.956974	0.957971	0.959391	0.955945	0.958464	0.956622	0.955934	0.957936	0.948279	0.945633	0.945006	0.957687	0.959638	0.960003	0.958053	0.958601	0.958277	0.957697	0.95859	0.959208	0.959522
C2-R-R3	0.957879	0.958311	0.956159	0.956117	0.95837	0.958118	0.960182	0.962732	0.963486	0.963039	0.962667		0.958416	0.953115	0.956335	0.956065	0.95484	0.956353	0.953484	0.950242	0.948454	0.954128	0.955467	0.954148	0.957989	0.955551	0.956637	0.956945	0.957645	0.958605	0.957215	0.956507	0.95568	0.953042	0.954522	0.955701	0.946166	0.944561	0.943216	0.955952	0.957693	0.95803	0.953813	0.955856	0.954999	0.95695	0.958854	0.956475	0.958659
C3-L-R1	0.959396	0.960741	0.956324	0.956089	0.958689	0.956751	0.961005	0.961618	0.961753	0.960803	0.960592	0.958416		0.964154	0.96342	0.960861	0.958529	0.963251	0.957044	0.948363	0.950447	0.953638	0.959955	0.955942	0.965381	0.96066	0.960656	0.960376	0.959073	0.959219	0.962879	0.960641	0.963902	0.957083	0.958224	0.958715	0.951217	0.950326	0.947398	0.962528	0.961642	0.962008	0.959661	0.961992	0.960662	0.960268	0.960181	0.958439	0.95804
C3-L-R2	0.958154	0.957902	0.957967	0.955686	0.957686	0.956633	0.954809	0.959142	0.959866	0.955225	0.956195	0.953115	0.964154		0.959968	0.958644	0.955244	0.956701	0.953117	0.946089	0.948337	0.953382	0.954482	0.957666	0.960673	0.960587	0.959396	0.95683	0.957706	0.958625	0.958744	0.961424	0.960256	0.952922	0.957173	0.955416	0.94493	0.939652	0.94209	0.957043	0.958521	0.958163	0.957009	0.956527	0.958311	0.955279	0.956436	0.956414	0.956053
C3-L-R3	0.959861	0.960237	0.959346	0.955017	0.957106	0.957596	0.957433	0.957517	0.960672	0.959402	0.957697	0.956335	0.96342	0.959968		0.959957	0.956332	0.958094	0.95424	0.949184	0.946834	0.955325	0.958128	0.956872	0.961226	0.958949	0.958874	0.958912	0.957944	0.958216	0.958107	0.95895	0.96053	0.954455	0.954487	0.956619	0.952679	0.950664	0.947084	0.956373	0.960405	0.958536	0.958057	0.957557	0.956921	0.956149	0.956227	0.954255	0.956179
C3-R-R1	0.955112	0.956725	0.95611	0.955058	0.958701	0.958676	0.952842	0.95623	0.95789	0.958067	0.956951	0.956065	0.960861	0.958644	0.959957		0.961755	0.96277	0.953104	0.949967	0.94878	0.955541	0.958612	0.957502	0.960359	0.959481	0.961353	0.958802	0.958117	0.957965	0.956466	0.956312	0.95703	0.952245	0.953589	0.952991	0.944123	0.941081	0.941335	0.956559	0.95693	0.958969	0.953894	0.955496	0.957159	0.956792	0.957447	0.954079	0.955759
C3-R-R2	0.955151	0.952058	0.954958	0.952342	0.956709	0.955716	0.955095	0.955108	0.958184	0.955784	0.955456	0.95484	0.958529	0.955244	0.956332	0.961755		0.963623	0.951713	0.943679	0.944015	0.955725	0.95737	0.956309	0.960185	0.958078	0.955998	0.956162	0.955179	0.95714	0.954065	0.956004	0.955291	0.951962	0.951739	0.952352	0.941746	0.941578	0.939414	0.958795	0.956896	0.958128	0.953534	0.953531	0.954415	0.953787	0.95537	0.952871	0.953909
C3-R-R3	0.954565	0.956901	0.954125	0.954714	0.957287	0.957983	0.956401	0.958051	0.959765	0.958544	0.958368	0.956353	0.963251	0.956701	0.958094	0.96277	0.963623		0.953594	0.950096	0.949487	0.954946	0.95869	0.958667	0.959914	0.958967	0.957521	0.956933	0.95736	0.958761	0.956022	0.954567	0.954975	0.954133	0.951695	0.952315	0.942708	0.941186	0.939969	0.957853	0.957612	0.959107	0.956431	0.958616	0.958319	0.955065	0.955566	0.957036	0.956335
M1-L-R1	0.954081	0.956711	0.954552	0.954435	0.954509	0.953133	0.955348	0.956271	0.958112	0.958278	0.954776	0.953484	0.957044	0.953117	0.95424	0.953104	0.951713	0.953594		0.957672	0.959972	0.957373	0.959695	0.957532	0.957266	0.954134	0.952073	0.957883	0.955713	0.956974	0.955946	0.955282	0.955597	0.953218	0.95402	0.953101	0.948023	0.947422	0.944427	0.955604	0.957304	0.951593	0.953641	0.950821	0.948344	0.952149	0.954826	0.953823	0.956505
M1-L-R2	0.948771	0.952841	0.949267	0.946233	0.948976	0.95226	0.947349	0.951521	0.952756	0.952787	0.950952	0.950242	0.948363	0.946089	0.949184	0.949967	0.943679	0.950096	0.957672		0.956543	0.954837	0.954019	0.954773	0.952144	0.94603	0.948064	0.95242	0.952376	0.952257	0.949949	0.949124	0.950691	0.948059	0.945819	0.949768	0.94152	0.94109	0.936745	0.947429	0.951514	0.950349	0.945327	0.946551	0.944453	0.94852	0.950645	0.948238	0.951294
M1-L-R3	0.948408	0.949602	0.949242	0.949349	0.950432	0.950875	0.947538	0.952576	0.952728	0.950864	0.94876	0.948454	0.950447	0.948337	0.946834	0.94878	0.944015	0.949487	0.959972	0.956543		0.950995	0.956176	0.95382	0.954352	0.949958	0.947299	0.950807	0.950669	0.950282	0.952073	0.950269	0.952549	0.948459	0.948094	0.946527	0.93992	0.93829	0.938402	0.950667	0.951841	0.950718	0.946393	0.946698	0.948194	0.945275	0.950531	0.950679	0.950316
M1-R-R1	0.954429	0.956521	0.95114	0.955122	0.956202	0.955634	0.954108	0.958418	0.957732	0.956373	0.9569	0.954128	0.953638	0.953382	0.955325	0.955541	0.955725	0.954946	0.957373	0.954837	0.950995		0.961663	0.960334	0.959329	0.954952	0.956611	0.955574	0.955803	0.955678	0.956943	0.954009	0.954757	0.954216	0.952293	0.953722	0.949853	0.946813	0.94248	0.9531	0.957529	0.955299	0.95248	0.952511	0.95118	0.952453	0.953809	0.952704	0.95376
M1-R-R2	0.957429	0.959963	0.955461	0.956124	0.961348	0.959469	0.958155	0.960448	0.958208	0.956976	0.956391	0.955467	0.959955	0.954482	0.958128	0.958612	0.95737	0.95869	0.959695	0.954019	0.956176	0.961663		0.962625	0.960925	0.958289	0.955075	0.95671	0.957264	0.955383	0.957078	0.957073	0.958207	0.952712	0.954892	0.953701	0.942214	0.940009	0.937581	0.957988	0.958161	0.956779	0.953219	0.953983	0.954964	0.953093	0.954306	0.953979	0.958354
M1-R-R3	0.956353	0.954861	0.955701	0.955974	0.956128	0.955279	0.951904	0.958086	0.960861	0.955633	0.954998	0.954148	0.955942	0.957666	0.956872	0.957502	0.956309	0.958667	0.957532	0.954773	0.95382	0.960334	0.962625		0.959301	0.96083	0.956735	0.955559	0.956416	0.955709	0.956761	0.958102	0.956385	0.954104	0.954789	0.951998	0.941897	0.939288	0.936293	0.955616	0.956617	0.954462	0.953249	0.951832	0.953033	0.95347	0.956425	0.954052	0.95555
M2-L-R1	0.960782	0.960222	0.958396	0.956253	0.960926	0.957987	0.960075	0.961253	0.963551	0.960191	0.95962	0.957989	0.965381	0.960673	0.961226	0.960359	0.960185	0.959914	0.957266	0.952144	0.954352	0.959329	0.960925	0.959301		0.966278	0.966262	0.960034	0.961315	0.962842	0.964381	0.960568	0.961543	0.961117	0.958977	0.959209	0.949171	0.948263	0.946291	0.961158	0.96249	0.96214	0.959336	0.961137	0.959954	0.956587	0.960731	0.958545	0.960229
M2-L-R2	0.958813	0.958537	0.956649	0.957307	0.960454	0.956535	0.957841	0.958653	0.962198	0.95877	0.961029	0.955551	0.96066	0.960587	0.958949	0.959481	0.958078	0.958967	0.954134	0.94603	0.949958	0.954952	0.958289	0.96083	0.966278		0.962759	0.956979	0.957666	0.959837	0.958628	0.958913	0.959753	0.955855	0.955751	0.956558	0.942287	0.940814	0.939843	0.959601	0.960431	0.960743	0.959382	0.957199	0.958914	0.953239	0.956677	0.95501	0.958262
M2-L-R3	0.957116	0.959462	0.95572	0.955316	0.958715	0.955201	0.955304	0.959505	0.961754	0.957825	0.958569	0.956637	0.960656	0.959396	0.958874	0.961353	0.955998	0.957521	0.952073	0.948064	0.947299	0.956611	0.955075	0.956735	0.966262	0.962759		0.958757	0.95765	0.959387	0.958963	0.958185	0.960963	0.955921	0.956655	0.956906	0.945355	0.941516	0.94046	0.957741	0.958393	0.959749	0.95505	0.957035	0.957718	0.953426	0.955549	0.956503	0.958739
M2-R-R1	0.963857	0.962291	0.962308	0.960985	0.962477	0.958945	0.958524	0.962731	0.960295	0.96098	0.958006	0.956945	0.960376	0.95683	0.958912	0.958802	0.956162	0.956933	0.957883	0.95242	0.950807	0.955574	0.95671	0.955559	0.960034	0.956979	0.958757		0.962641	0.964615	0.962504	0.96066	0.960751	0.960014	0.961208	0.959884	0.953559	0.950696	0.949111	0.960161	0.960295	0.960504	0.955529	0.955505	0.9562	0.958174	0.960602	0.959731	0.963212
M2-R-R2	0.960468	0.962312	0.960165	0.96027	0.959347	0.960795	0.958952	0.959592	0.959453	0.960733	0.956974	0.957645	0.959073	0.957706	0.957944	0.958117	0.955179	0.95736	0.955713	0.952376	0.950669	0.955803	0.957264	0.956416	0.961315	0.957666	0.95765	0.962641		0.963639	0.96277	0.958791	0.959757	0.959529	0.957797	0.959294	0.948848	0.945138	0.944717	0.960058	0.960788	0.96018	0.954238	0.956068	0.956776	0.959374	0.957852	0.957025	0.957752
M2-R-R3	0.963527	0.960123	0.961152	0.960386	0.96139	0.95753	0.957828	0.958523	0.960477	0.959685	0.957971	0.958605	0.959219	0.958625	0.958216	0.957965	0.95714	0.958761	0.956974	0.952257	0.950282	0.955678	0.955383	0.955709	0.962842	0.959837	0.959387	0.964615	0.963639		0.962092	0.96053	0.960163	0.956672	0.959503	0.960375	0.94782	0.944255	0.943546	0.96104	0.962723	0.960254	0.956693	0.955935	0.956678	0.957406	0.961821	0.957035	0.958487
M3-L-R1	0.96267	0.962091	0.959286	0.959999	0.961449	0.959491	0.95864	0.963623	0.962509	0.961024	0.959391	0.957215	0.962879	0.958744	0.958107	0.956466	0.954065	0.956022	0.955946	0.949949	0.952073	0.956943	0.957078	0.956761	0.964381	0.958628	0.958963	0.962504	0.96277	0.962092		0.965584	0.964765	0.962101	0.961838	0.965836	0.952356	0.947302	0.9472	0.961253	0.958526	0.959812	0.960616	0.962871	0.961472	0.96424	0.960924	0.963832	0.9617
M3-L-R2	0.95979	0.96067	0.959018	0.958961	0.960705	0.957472	0.958083	0.961482	0.962065	0.957843	0.955945	0.956507	0.960641	0.961424	0.95895	0.956312	0.956004	0.954567	0.955282	0.949124	0.950269	0.954009	0.957073	0.958102	0.960568	0.958913	0.958185	0.96066	0.958791	0.96053	0.965584		0.96507	0.960615	0.962994	0.962978	0.950753	0.944094	0.946169	0.960837	0.959137	0.958587	0.960474	0.960878	0.959078	0.960817	0.961777	0.960361	0.960422
M3-L-R3	0.959186	0.960614	0.959892	0.95994	0.960396	0.958544	0.957832	0.961767	0.962243	0.957408	0.958464	0.95568	0.963902	0.960256	0.96053	0.95703	0.955291	0.954975	0.955597	0.950691	0.952549	0.954757	0.958207	0.956385	0.961543	0.959753	0.960963	0.960751	0.959757	0.960163	0.964765	0.96507		0.961468	0.964043	0.961371	0.950036	0.949119	0.945416	0.960258	0.961312	0.959202	0.961086	0.960893	0.959086	0.960697	0.961278	0.961716	0.960671
M3-R-R1	0.959383	0.958691	0.956095	0.957419	0.960732	0.957107	0.957616	0.958754	0.95954	0.958851	0.956622	0.953042	0.957083	0.952922	0.954455	0.952245	0.951962	0.954133	0.953218	0.948059	0.948459	0.954216	0.952712	0.954104	0.961117	0.955855	0.955921	0.960014	0.959529	0.956672	0.962101	0.960615	0.961468		0.965334	0.967064	0.944991	0.943221	0.940059	0.958575	0.957298	0.959199	0.961714	0.959941	0.956846	0.960973	0.961724	0.960151	0.961723
M3-R-R2	0.959488	0.960468	0.956544	0.957837	0.961492	0.95645	0.958337	0.961759	0.958752	0.957794	0.955934	0.954522	0.958224	0.957173	0.954487	0.953589	0.951739	0.951695	0.95402	0.945819	0.948094	0.952293	0.954892	0.954789	0.958977	0.955751	0.956655	0.961208	0.957797	0.959503	0.961838	0.962994	0.964043	0.965334		0.96548	0.946153	0.942805	0.94233	0.960061	0.959355	0.95693	0.960156	0.958454	0.95934	0.960407	0.963412	0.960153	0.960528
M3-R-R3	0.95785	0.960544	0.957356	0.958705	0.962041	0.958007	0.956948	0.958806	0.961745	0.958047	0.957936	0.955701	0.958715	0.955416	0.956619	0.952991	0.952352	0.952315	0.953101	0.949768	0.946527	0.953722	0.953701	0.951998	0.959209	0.956558	0.956906	0.959884	0.959294	0.960375	0.965836	0.962978	0.961371	0.967064	0.96548		0.947721	0.945066	0.945119	0.957392	0.959187	0.959745	0.960244	0.962374	0.959776	0.965063	0.962917	0.964912	0.962728
T1-L-R1	0.947754	0.955005	0.948426	0.9469	0.946642	0.952301	0.944044	0.94443	0.946923	0.948945	0.948279	0.946166	0.951217	0.94493	0.952679	0.944123	0.941746	0.942708	0.948023	0.94152	0.93992	0.949853	0.942214	0.941897	0.949171	0.942287	0.945355	0.953559	0.948848	0.94782	0.952356	0.950753	0.950036	0.944991	0.946153	0.947721		0.963391	0.961378	0.953657	0.948273	0.949202	0.945276	0.94786	0.94774	0.946575	0.947325	0.945805	0.95195
T1-L-R2	0.946122	0.952905	0.947386	0.943615	0.942466	0.951776	0.94412	0.940586	0.945586	0.945585	0.945633	0.944561	0.950326	0.939652	0.950664	0.941081	0.941578	0.941186	0.947422	0.94109	0.93829	0.946813	0.940009	0.939288	0.948263	0.940814	0.941516	0.950696	0.945138	0.944255	0.947302	0.944094	0.949119	0.943221	0.942805	0.945066	0.963391		0.958555	0.952184	0.947712	0.945805	0.944654	0.945285	0.946986	0.941993	0.944599	0.941602	0.947287
T1-L-R3	0.943417	0.950074	0.945833	0.945274	0.942584	0.947865	0.941364	0.940037	0.94297	0.942464	0.945006	0.943216	0.947398	0.94209	0.947084	0.941335	0.939414	0.939969	0.944427	0.936745	0.938402	0.94248	0.937581	0.936293	0.946291	0.939843	0.94046	0.949111	0.944717	0.943546	0.9472	0.946169	0.945416	0.940059	0.94233	0.945119	0.961378	0.958555		0.950796	0.946353	0.945942	0.943722	0.944908	0.947546	0.941547	0.943879	0.941288	0.946619
T1-R-R1	0.95905	0.960137	0.959418	0.960088	0.961146	0.958059	0.958551	0.959994	0.958615	0.95847	0.957687	0.955952	0.962528	0.957043	0.956373	0.956559	0.958795	0.957853	0.955604	0.947429	0.950667	0.9531	0.957988	0.955616	0.961158	0.959601	0.957741	0.960161	0.960058	0.96104	0.961253	0.960837	0.960258	0.958575	0.960061	0.957392	0.953657	0.952184	0.950796		0.962081	0.961235	0.959166	0.956176	0.959123	0.958345	0.95924	0.957966	0.960637
T1-R-R2	0.959339	0.96001	0.960358	0.959608	0.959895	0.960817	0.959103	0.959572	0.963063	0.958866	0.959638	0.957693	0.961642	0.958521	0.960405	0.95693	0.956896	0.957612	0.957304	0.951514	0.951841	0.957529	0.958161	0.956617	0.96249	0.960431	0.958393	0.960295	0.960788	0.962723	0.958526	0.959137	0.961312	0.957298	0.959355	0.959187	0.948273	0.947712	0.946353	0.962081		0.961581	0.95817	0.957985	0.960709	0.960379	0.961749	0.957356	0.957158
T1-R-R3	0.959475	0.959364	0.95667	0.956651	0.960208	0.958657	0.957943	0.957996	0.96084	0.958524	0.960003	0.95803	0.962008	0.958163	0.958536	0.958969	0.958128	0.959107	0.951593	0.950349	0.950718	0.955299	0.956779	0.954462	0.96214	0.960743	0.959749	0.960504	0.96018	0.960254	0.959812	0.958587	0.959202	0.959199	0.95693	0.959745	0.949202	0.945805	0.945942	0.961235	0.961581		0.957099	0.957052	0.957555	0.960047	0.959012	0.957474	0.958011
T2-L-R1	0.959027	0.954559	0.953915	0.957041	0.95863	0.95391	0.956779	0.958602	0.961478	0.957502	0.958053	0.953813	0.959661	0.957009	0.958057	0.953894	0.953534	0.956431	0.953641	0.945327	0.946393	0.95248	0.953219	0.953249	0.959336	0.959382	0.95505	0.955529	0.954238	0.956693	0.960616	0.960474	0.961086	0.961714	0.960156	0.960244	0.945276	0.944654	0.943722	0.959166	0.95817	0.957099		0.961702	0.963352	0.964117	0.961799	0.958079	0.957463
T2-L-R2	0.955058	0.955415	0.953699	0.956454	0.955829	0.955439	0.954826	0.959851	0.960224	0.959836	0.958601	0.955856	0.961992	0.956527	0.957557	0.955496	0.953531	0.958616	0.950821	0.946551	0.946698	0.952511	0.953983	0.951832	0.961137	0.957199	0.957035	0.955505	0.956068	0.955935	0.962871	0.960878	0.960893	0.959941	0.958454	0.962374	0.94786	0.945285	0.944908	0.956176	0.957985	0.957052	0.961702		0.963098	0.961828	0.962601	0.960187	0.957303
T2-L-R3	0.956731	0.956118	0.952802	0.955403	0.958295	0.954923	0.955052	0.960536	0.959783	0.95772	0.958277	0.954999	0.960662	0.958311	0.956921	0.957159	0.954415	0.958319	0.948344	0.944453	0.948194	0.95118	0.954964	0.953033	0.959954	0.958914	0.957718	0.9562	0.956776	0.956678	0.961472	0.959078	0.959086	0.956846	0.95934	0.959776	0.94774	0.946986	0.947546	0.959123	0.960709	0.957555	0.963352	0.963098		0.96243	0.962133	0.962202	0.958495
T2-R-R1	0.957737	0.958793	0.95537	0.955671	0.959187	0.957873	0.957856	0.959982	0.961165	0.958687	0.957697	0.95695	0.960268	0.955279	0.956149	0.956792	0.953787	0.955065	0.952149	0.94852	0.945275	0.952453	0.953093	0.95347	0.956587	0.953239	0.953426	0.958174	0.959374	0.957406	0.96424	0.960817	0.960697	0.960973	0.960407	0.965063	0.946575	0.941993	0.941547	0.958345	0.960379	0.960047	0.964117	0.961828	0.96243		0.965293	0.963648	0.962024
T2-R-R2	0.959835	0.95748	0.958471	0.958698	0.961789	0.957673	0.960214	0.961602	0.961936	0.960985	0.95859	0.958854	0.960181	0.956436	0.956227	0.957447	0.95537	0.955566	0.954826	0.950645	0.950531	0.953809	0.954306	0.956425	0.960731	0.956677	0.955549	0.960602	0.957852	0.961821	0.960924	0.961777	0.961278	0.961724	0.963412	0.962917	0.947325	0.944599	0.943879	0.95924	0.961749	0.959012	0.961799	0.962601	0.962133	0.965293		0.964692	0.961184
T2-R-R3	0.957582	0.959445	0.954842	0.957231	0.961086	0.958094	0.956903	0.96112	0.960678	0.959495	0.959208	0.956475	0.958439	0.956414	0.954255	0.954079	0.952871	0.957036	0.953823	0.948238	0.950679	0.952704	0.953979	0.954052	0.958545	0.95501	0.956503	0.959731	0.957025	0.957035	0.963832	0.960361	0.961716	0.960151	0.960153	0.964912	0.945805	0.941602	0.941288	0.957966	0.957356	0.957474	0.958079	0.960187	0.962202	0.963648	0.964692		0.95999
T3-L-R1	0.961351	0.961288	0.95837	0.957727	0.962014	0.957495	0.958757	0.963823	0.962136	0.960021	0.959522	0.958659	0.95804	0.956053	0.956179	0.955759	0.953909	0.956335	0.956505	0.951294	0.950316	0.95376	0.958354	0.95555	0.960229	0.958262	0.958739	0.963212	0.957752	0.958487	0.9617	0.960422	0.960671	0.961723	0.960528	0.962728	0.95195	0.947287	0.946619	0.960637	0.957158	0.958011	0.957463	0.957303	0.958495	0.962024	0.961184	0.95999
T3-L-R2	0.962055	0.962287	0.961706	0.959716	0.960524	0.959584	0.96152	0.963696	0.962694	0.961864	0.961008	0.958529	0.962087	0.961216	0.959812	0.959388	0.957315	0.955322	0.957378	0.953302	0.953092	0.958346	0.958168	0.960577	0.960102	0.96069	0.957567	0.9629	0.95957	0.960778	0.964347	0.965662	0.965278	0.960914	0.961536	0.961494	0.953938	0.951382	0.949444	0.961097	0.960267	0.960486	0.960538	0.958393	0.958692	0.960135	0.962736	0.961855	0.965844
T3-L-R3	0.960562	0.962229	0.957683	0.958264	0.960303	0.959665	0.960351	0.960952	0.961001	0.959464	0.960911	0.95538	0.962199	0.957232	0.958614	0.956881	0.956151	0.957601	0.957986	0.951992	0.954023	0.954951	0.956558	0.955427	0.962449	0.95753	0.958192	0.960066	0.959363	0.961176	0.962253	0.960852	0.961906	0.963799	0.95984	0.964542	0.949462	0.946379	0.944314	0.959567	0.959856	0.962137	0.958976	0.959411	0.960427	0.961832	0.962061	0.958629	0.963854
T3-R-R1	0.961223	0.961387	0.957967	0.960556	0.960231	0.959664	0.960407	0.962115	0.962399	0.962909	0.961513	0.956929	0.962212	0.956057	0.958008	0.954829	0.953986	0.954938	0.958202	0.951632	0.951316	0.956054	0.959019	0.955977	0.96167	0.956848	0.958987	0.961945	0.961658	0.960296	0.965045	0.963582	0.963739	0.963653	0.961905	0.964724	0.955201	0.950787	0.948011	0.958406	0.96002	0.95944	0.960897	0.95883	0.960029	0.960836	0.961285	0.961066	0.964815
T3-R-R2	0.960331	0.959777	0.958951	0.959669	0.958863	0.960377	0.96243	0.965051	0.963802	0.962299	0.960733	0.958452	0.958468	0.954999	0.956856	0.956359	0.956616	0.956076	0.95747	0.956438	0.954969	0.958788	0.959103	0.95921	0.960737	0.958312	0.95735	0.961309	0.961226	0.961875	0.964343	0.963514	0.96335	0.962912	0.962565	0.964887	0.945893	0.945227	0.944426	0.959332	0.962045	0.960224	0.959034	0.96017	0.957834	0.962527	0.963257	0.960348	0.964134
T3-R-R3	0.95634	0.959589	0.957169	0.957745	0.958901	0.958127	0.960829	0.961166	0.960497	0.961711	0.957634	0.95631	0.960769	0.953316	0.955523	0.9557	0.95424	0.958666	0.955239	0.952691	0.952247	0.957046	0.957117	0.953319	0.959739	0.956562	0.957205	0.959196	0.959435	0.958258	0.964454	0.959211	0.962178	0.961139	0.95812	0.96154	0.946365	0.943324	0.941434	0.959411	0.959331	0.958811	0.956569	0.95947	0.956572	0.958171	0.959122	0.958493	0.963707
[truncated: 5 more columns]
