# Supplementary material for: Differential proteomic analysis of mouse cerebrums with high-fat diet (HFD)-induced hyperlipidemia
Source: PeerJ. 2022 Aug 3;10:e13806. doi: 10.7717/peerj.13806 (PMC9356585; doi:10.7717/peerj.13806)
Supplement: Supplemental Information 5 [file peerj-10-13806-s005.xlsx]

## Sheet: 1-GO-cellular component
Supplemental Table S4-1. The gene ontology (GO) analysis of the 4422 proteins by celluar component (CC), using DAVID (ver. 6.8).
Category	Term	Count	%	PValue	Genes	List Total	Pop Hits	Pop Total	Fold Enrichment	Bonferroni	Benjamini	FDR
GOTERM_CC_DIRECT	GO:0070062~extracellular exosome	1275	28.8527	7.12573e-229	Q9D2U9, A2AQ07, Q9CR67, Q6P1B1, Q7M6Z0, Q9Z0P5, Q8R5M8, O70250, O70492, Q9ER00, P18760, O70493, A3KMP2, P63321, Q6P9R2, Q91X72, Q9Z2U1, Q8BTZ7, Q9DB34, P63325, Q9Z2U0, Q569Z6, P05213, Q9Z127, Q9D358, P97351, Q9CR57, P97352, P97355, Q924M7, Q9CR51, Q06138, P17439, Q5U458, P62242, P62245, Q9DB29, O35474, P63330, Q8BYB9, Q8K183, Q9Z130, P29416, Q9WVE8, Q9DCU2, Q9DB20, Q922H4, Q9Z0R6, Q80VQ0, P97326,…	4286	2674	19662	2.18738	7.9737e-226	7.9737e-226	6.32765e-226
GOTERM_CC_DIRECT	GO:0005737~cytoplasm	2307	52.2064	1.93228e-208	Q5RJI5, Q6P1B1, Q9QXZ0, P49025, Q7M6Z0, Q9Z0P5, Q9Z0P4, O35495, P18760, O70251, Q9DAR7, Q80W47, Q6P9R2, P63328, P61148, Q8QZY1, Q9DB34, P63325, Q9Z127, Q9EQN3, Q920E5, Q924M7, Q06138, P39688, Q3TY60, P62484, Q9DB27, Q9JKS5, P62482, P42859, P63330, A6H5Y3, Q9Z130, Q91WU5, Q6P9S0, Q9WVE8, Q91WT9, Q7TPV4, Q14BB9, Q9Z0R6, Q80VQ0, Q80W21, Q80W22, Q6P5H6, Q9R1L5, P61161, Q99104, Q8JZK9, P61164, Q8BRT1,…	4286	6631	19662	1.59604	2.16222e-205	1.08111e-205	8.57932e-206
GOTERM_CC_DIRECT	GO:0005739~mitochondrion	863	19.5293	8.87813e-164	P06537, Q9CR68, Q9CR62, Q62086, Q9CR61, Q80Y81, Q8JZN5, Q9DAR7, P37040, P63328, Q8BTZ7, Q8K0X8, Q9WVD5, Q9DCV4, Q920E5, P54869, Q5U458, P39688, Q9DCU6, P62245, Q2TPA8, P42859, Q91YY4, Q91WU5, Q8BTY1, Q9DB20, Q922H2, Q8CC21, Q9CQS4, P63101, Q9DB15, Q9CZD3, Q8BTX9, Q924L1, Q9WVF8, P62259, Q9DCT2, Q99JB2, Q9CQR4, Q8R3F5, Q3UYV9, Q9D338, Q3TY86, Q80TL0, P62264, P16332, P14152, Q62083, Q9DCS9, Q91WS0,…	4286	1721	19662	2.30041	9.93463e-161	3.31154e-161	2.62793e-161
GOTERM_CC_DIRECT	GO:0016020~membrane	2267	51.3012	1.0033e-152	Q8R3I3, Q8R3I2, Q9QXZ0, P49025, Q7M6Z0, Q9Z0P4, Q9ER00, O35495, P18760, O70252, Q9R1J0, P17427, P17426, P0CW02, P63321, P63323, P37040, Q80W47, Q9JL56, Q60902, P63328, Q8QZY1, Q9WVD5, Q9DB34, P63325, Q3U1F9, Q9Z127, P28571, Q7M6Y3, P17439, P39688, Q8VHE0, P62482, Q7TQ95, P29416, Q9WVE8, Q9DB20, Q9Z0R9, Q91X56, Q9Z0R4, Q7TPV4, Q80VQ0, Q3TXX4, Q64487, Q9R1L5, P61161, Q99104, Q9JKR6, Q8BRT1, Q99JB8,…	4286	6998	19662	1.48612	1.12269e-149	2.80674e-150	2.22733e-150
GOTERM_CC_DIRECT	GO:0005829~cytosol	844	19.0993	6.18931e-140	P06537, Q91V36, Q6P1B1, P49025, O35495, O70250, O70492, O35250, Q07235, P18760, Q5SXA9, Q80W47, P63328, Q9Z2U1, P61148, Q9DB34, Q9Z2U0, P05213, Q9Z127, P97351, P97352, Q9CR51, O70481, P39688, P62484, P62482, P42859, P63330, Q8BPQ7, Q8K183, A6H5Y3, Q9Z2V5, Q91WU5, Q8BTY1, Q9WVE8, Q91WT9, Q922H1, Q9Z0R4, Q9Z2V6, Q80VQ0, Q9ET22, P51125, P56812, P63101, P61161, Q99104, Q80TM9, Q8JZK9, Q91V12, P62259,…	4286	1784	19662	2.17032	6.92584e-137	1.38517e-137	1.09922e-137
GOTERM_CC_DIRECT	GO:0043209~myelin sheath	173	3.91491	6.04548e-91	Q810U3, Q8CAQ8, Q9CR68, P07901, Q60864, Q922J6, P38647, P16858, Q9R0P9, Q61553, P13595, O08553, P63321, O55131, P17156, Q01768, Q8BHJ6, Q9Z1B3, P16460, P48962, P62631, P56480, Q5SYD0, P62874, P05213, P10649, P29387, P46660, P12787, Q03265, P10126, P35486, Q8VDN2, Q99P72, P53810, P15532, P62880, P62881, P67778, P39053, Q5M8N0, Q61171, P04370, P05064, O09131, P43024, Q9DB20, P51881, P50396, P27573,…	4286	192	19662	4.13352	6.76489e-88	1.12748e-88	8.9473e-89
GOTERM_CC_DIRECT	GO:0045202~synapse	314	7.10568	7.33384e-87	P52795, Q810U4, Q5RJI5, Q9WV31, Q8VHW2, Q61315, P12658, Q8R5M8, Q9JKD3, Q71LX4, P70663, Q99L88, Q8C7M3, Q9CS84, Q66L44, Q7TMB8, Q6R891, Q80U04, Q9QXJ1, P60853, Q2TBE6, Q8BJ42, Q99J31, Q8CC35, Q9Z1S5, P30999, Q9EPL2, Q8BLY3, P28571, Q62418, Q7M6Y3, Q6WVG3, P14602, P60191, Q8BYR5, Q99MI1, P62482, Q80TN5, Q9QWI6, Q9DBS2, P46096, P60879, P97441, Q8R4I7, Q9Z0R4, P46097, Q2WF71, Q3TXX4, Q99M87, Q04735,…	4286	505	19662	2.85242	8.20657e-84	1.17237e-84	9.30351e-85
GOTERM_CC_DIRECT	GO:0005913~cell-cell adherens junction	215	4.86535	1.31341e-69	Q62523, Q61315, Q8BKX1, Q9Z0P5, Q8R5M8, Q3UHC7, Q3TZZ7, Q61792, Q6PAR5, Q61553, Q60902, P47753, P61027, P47757, Q60598, Q9CR57, Q8BK64, Q62417, P30999, Q99LX0, Q62419, Q62418, Q7M6Y3, Q6NZJ6, Q6KAR6, P39447, Q9QWY8, P59759, P62484, Q99MI1, Q9CQC6, E9PVA8, O88448, Q9WVE8, Q9WV55, Q78PY7, Q9CX00, P51125, Q7TQH0, P63101, Q9JHL1, Q8K298, P62259, Q61301, P61979, P10107, Q9D8N0, P62827, Q9CZ30, Q9D6Z1,…	4286	316	19662	3.12124	1.4697e-66	1.83713e-67	1.45788e-67
GOTERM_CC_DIRECT	GO:0005925~focal adhesion	243	5.49898	6.44242e-67	Q62523, Q810U3, P62918, Q9ES28, P97461, Q9WV32, Q9R1Z8, P18760, Q71LX4, Q61792, Q07113, Q99L88, P63321, P49817, P70429, Q7TMB8, Q9JM76, P61022, P61027, P20152, P63325, Q8BJU2, P97351, Q60598, Q62417, Q3UTJ2, P35762, P14602, Q80YX1, Q9WTQ5, P62242, O08688, O35114, O35598, Q5SSZ5, Q9QWI6, Q9WVE8, P52332, P28660, P48036, P97447, Q9WTR5, P53668, Q9DBR7, Q04736, P63101, P61161, Q9JKR6, Q9JHL1, Q8BRT1,…	4286	391	19662	2.85105	7.20906e-64	8.01007e-65	6.35652e-65
GOTERM_CC_DIRECT	GO:0043005~neuron projection	248	5.61213	4.74474e-62	P55821, Q9ES28, P06537, Q61315, P12658, Q8BKX1, Q8R5M8, P97467, Q9CQU5, P70425, O08553, Q7TMB8, Q6R891, P16460, Q9CQD1, P20152, O35927, Q5SYD0, P60853, Q2TBE6, Q9R0Y5, Q61327, Q9Z1S5, Q99LX0, P62482, O88447, P24529, P63330, O88569, O88448, P47743, Q9QWI6, Q9Z2V5, Q8CIP4, P50396, P46096, P60879, P97441, Q9Z0R4, P03921, Q3TXX4, Q9WTR5, P53668, P15105, Q04735, P21107, Q99104, Q8BGN8, Q5SVL6, P62137,…	4286	420	19662	2.70881	5.30936e-59	5.30936e-60	4.21333e-60
GOTERM_CC_DIRECT	GO:0005743~mitochondrial inner membrane	235	5.31795	5.72688e-62	Q8CAQ8, Q9CR68, Q9CR62, Q9CR61, Q99LY9, Q9WTP6, O35129, Q8K1Z0, Q91W50, P48962, P56480, Q9WVD5, Q921G7, P12787, Q8BSF4, P54869, Q5U458, Q8VCL2, Q9CQC7, P47740, P43024, P54071, Q3UIU2, Q9DB20, Q78IK2, P56135, P03921, Q9CPQ8, Q8CC21, Q5NCE8, Q91WD5, Q9CPQ3, Q9CPQ1, Q8R1S0, Q9D3D9, Q924L1, P22315, Q9D6J6, Q925N0, Q91VR2, Q9D6J5, Q9DCT2, Q99JB2, Q9CPP6, P97450, Q61425, Q64373, Q3TY86, Q99JR1, Q9CQA3,…	4286	387	19662	2.78569	6.40838e-59	5.8258e-60	4.62315e-60
GOTERM_CC_DIRECT	GO:0030054~cell junction	351	7.94297	1.28839e-59	Q62523, Q9ES28, Q5RJI5, Q9WV31, Q8VHW2, Q61315, Q9R1Z8, Q8R5M8, Q9JKD3, Q71LX4, Q99L88, Q8C7M3, Q61553, Q9CS84, Q66L44, Q7TMB8, Q6R891, Q80U04, O35927, P60853, Q2TBE6, Q8BJ42, Q60598, Q99J31, Q8CC35, Q62417, Q9Z1S5, Q9EPL2, Q3UTJ2, Q62419, Q8BLY3, Q62418, Q3B7Z2, Q6WVG3, P60191, P39447, Q8BYR5, Q5DTX6, Q5SSZ5, P62482, Q80TN5, Q9QWI6, Q9DBS2, Q8BYA0, P46096, P60879, Q9WV55, P97441, Q8R4I7, Q9D7M1,…	4286	718	19662	2.24263	1.44171e-56	1.20142e-57	9.53408e-58
GOTERM_CC_DIRECT	GO:0014069~postsynaptic density	167	3.77914	1.39009e-56	Q9WV31, Q8BWG8, Q8VHW2, Q61831, P06537, Q9QXZ0, Q8BKX1, Q9Z0P4, P10637, Q9Z2D1, Q6PAJ1, A2AHG0, Q62245, Q01097, O88737, Q6R891, Q80U04, Q9CYT6, O35927, Q923T9, P60853, Q8BJ42, Q60875, Q8CC35, Q9EPL2, Q3UTJ2, Q62418, Q7M6Y3, Q9JLM8, Q8VDN2, P35922, Q99P72, P39688, Q8K4G5, Q9QXS6, P39054, Q03137, O35598, P42859, P62482, P63330, Q9QWI6, Q6PFD5, P63216, E9PZ19, Q8R4I7, Q62108, Q8BIZ1, Q2WF71, Q9Z0J4,…	4286	239	19662	3.20549	1.55551e-53	1.19655e-54	9.49539e-55
GOTERM_CC_DIRECT	GO:0030424~axon	216	4.88798	7.62427e-53	P55821, Q810U3, Q810U4, Q61315, Q924N4, P12658, Q8R5M8, Q9Z0P4, Q3UHC7, Q9Z2D1, O08553, Q7TPH6, Q9CQD1, P20152, Q8K0X8, Q5SYD0, B9EKR1, Q9JKC8, Q8CC35, Q61327, Q99LX0, Q8BLY3, P14602, P22907, P62482, O88447, P24529, P42859, Q9D906, Q9QWI6, Q9Z2V5, Q91Y86, Q9WTR1, P46096, P60879, P46097, Q61771, Q99104, Q9QXL2, Q9JLT4, Q9CZD3, Q9JM52, Q5XJV6, Q8R366, Q9Z140, P62259, Q61301, Q61423, P54763, P97333,…	4286	370	19662	2.6781	8.53155e-50	6.09397e-51	4.83596e-51
GOTERM_CC_DIRECT	GO:0043025~neuronal cell body	272	6.15524	1.88675e-50	P55821, Q9ES28, Q61315, P12658, Q8BKX1, P49025, P97467, Q9JMH6, Q3UHC7, Q07235, Q9CS84, O08553, Q6R891, P16460, Q9QXJ1, Q9CQD1, P47757, Q5SYD0, B9EKR1, Q2TBE6, Q91YI0, Q61327, Q3UTJ2, P51910, Q8K2K6, Q7M6Y3, Q91VC3, P15388, Q922Y1, O88447, P24529, P42859, O88569, P04370, P47743, Q9QWI6, P60879, Q91V14, P48036, P97445, Q61772, Q99104, Q9JLT4, Q91ZZ3, P62137, P28658, P54763, Q9Z2W8, P97333, Q9WV60,…	4286	534	19662	2.3367	2.11127e-47	1.40751e-48	1.11696e-48
GOTERM_CC_DIRECT	GO:0030529~intracellular ribonucleoprotein complex	192	4.34487	1.74919e-49	P62918, P97461, P09405, O70133, Q8BK72, Q9ER88, P16858, Q9CQ40, P62082, Q62241, Q9D883, P57722, Q80ZK0, P62751, Q6DFW4, Q80ZS3, Q9D1B9, P60335, P62911, Q9D7N3, Q8BN59, P25444, P47911, P63325, P62754, P97351, Q8BK63, Q9CR57, Q9CPR5, Q9JJI8, P14206, Q62376, P35922, Q9CPR4, Q91VC3, P62242, O55142, Q9DCU6, P84099, O88569, Q9D1I6, P62889, P60867, Q9CZM2, Q9CX86, P53026, Q9CXY6, Q91VR5, Q61656, Q9D0G0,…	4286	320	19662	2.7525	1.95735e-46	1.22334e-47	9.70801e-48
GOTERM_CC_DIRECT	GO:0030425~dendrite	250	5.65739	1.59589e-46	Q61315, P12658, Q8R5M8, Q3UHC7, Q9Z2D1, Q8C7M3, Q9CQU5, Q8JZN5, Q61553, O08553, Q6R891, Q9CQD1, Q6ZQ29, O35927, Q8K0X8, B9EKR1, Q2TBE6, Q8BJ42, Q99J31, Q8CC35, Q3UTJ2, Q8BLY3, Q62418, P51910, P14602, Q91VC3, P15388, P62484, Q922Y1, P24529, P42859, Q9QWI6, Q9Z2V5, P63216, P54754, P48036, Q9JMF3, P97445, Q61772, Q99104, Q9QXL2, Q9JLT4, Q9JM52, Q5XJV6, P28658, Q9Z140, O89086, P54763, O70589, Q9WTS5,…	4286	490	19662	2.34056	1.7858e-43	1.05047e-44	8.33619e-45
GOTERM_CC_DIRECT	GO:0005768~endosome	260	5.88368	8.15072e-42	P55821, Q9WV31, Q9JKD3, G3XA57, Q9Z2D1, Q9ER00, O70492, O70493, Q91YJ2, Q07113, Q6PAR5, Q9JJR8, P49817, P47759, Q5KU39, P61021, Q3UR70, Q9CQD1, P61027, Q9DB34, Q5SYD0, Q04519, Q2TBE6, Q6PB44, Q8R5L3, P98200, Q62419, Q62418, Q7M6Y3, Q8VDN2, P39688, Q8BVL3, Q80ZJ7, P56371, P46414, Q80ZJ1, Q9WVE8, Q9CQ26, Q6PF93, P60879, P97441, Q9Z1T6, Q9CQ22, Q8R361, Q80TM9, P09470, Q9CRD0, P83510, Q99JB8, Q9Z140,…	4286	544	19662	2.19255	9.12066e-39	5.06703e-40	4.02102e-40
GOTERM_CC_DIRECT	GO:0048471~perinuclear region of cytoplasm	307	6.94727	3.05523e-41	P55821, P54731, Q61315, Q9Z0P5, P97467, Q9CZW4, Q5SXA9, Q99J45, Q07113, P49817, Q7TMB8, Q9QXJ1, Q9CQD1, P61027, P20152, P01872, P97352, Q62415, Q9R0Y5, Q91YI0, Q99LX0, Q3UTJ2, Q3B7Z2, P51910, Q7M6Y3, Q8BMK4, O88685, Q9Z2V5, P56371, Q9D6K5, P60879, Q9WV55, Q9Z1T6, Q9Z1D1, P70441, Q9WTR5, P53668, P63101, Q9CQB5, Q9CZT8, P83510, P28658, O89084, Q9WTS4, Q9Z266, Q9WV60, P14824, Q7TSK2, Q8CGZ0, O35381,…	4286	692	19662	2.0352	3.4188e-38	1.79937e-39	1.42792e-39
GOTERM_CC_DIRECT	GO:0005856~cytoskeleton	424	9.59493	3.98721e-37	Q5RJI5, Q9CQ48, Q922J3, P06537, A2AQ07, Q9QXZ0, Q9Z0P5, P18760, Q71LX4, Q9JM76, P61022, Q9DC51, Q8K0X8, Q9DCV4, P97470, P05213, Q9Z1S5, Q8CC35, Q3UTJ2, Q921G8, P62484, Q9DBS5, P62482, Q6PGN3, Q8BMK4, P63330, Q8BP00, Q9WVE8, Q91VR7, P52332, P28661, Q14BB9, Q6P5H6, Q9R1L5, P61161, P61164, Q8BRT1, Q8K298, Q99JB2, Q2KN98, Q9CQR4, Q64373, Q8R5J9, Q62083, Q9DC28, Q3UHU5, Q9CPW4, Q6PDL0, P97427, Q8CBW3,…	4286	1113	19662	1.74762	4.46168e-34	2.23084e-35	1.77032e-35
GOTERM_CC_DIRECT	GO:0043234~protein complex	276	6.24576	3.33062e-36	Q9D920, Q9ES28, P06537, Q61315, Q91YJ2, Q5SXA9, Q99L88, P70302, O08788, P17426, Q9CS84, O08553, O35129, Q9Z2D8, Q6PDG5, P49817, Q80W47, Q9QXJ1, Q9Z2D6, Q9CQD1, Q8CBC4, Q2TBE6, P97471, Q9Z1S8, Q9DBC7, P62806, Q06138, Q8VDN2, Q3THE2, Q8VI75, Q8BVL3, P32020, P42859, O88448, Q9Z2V5, P46414, P50396, P07724, Q9Z2V6, Q8CF89, P97445, Q61097, P19157, P15105, Q04857, P63101, Q9CQB5, Q9JHL1, O70589, Q63844,…	4286	628	19662	2.01616	3.72696e-33	1.77474e-34	1.40838e-34
GOTERM_CC_DIRECT	GO:0005759~mitochondrial matrix	118	2.67029	3.39992e-33	Q9D924, Q8BH95, Q9WTP7, Q9ER88, Q9WUR9, Q9DBL7, Q9Z1J3, Q9DBL1, Q8K2C6, Q9CZN7, Q3UV70, Q99MR8, Q99LP6, O88696, Q91VT4, Q60597, Q920E5, Q99LX0, A6H611, Q99J39, O08715, P54869, P35486, Q64433, Q99KE1, Q9DCM0, Q9DA03, Q80XN0, Q9DCM2, Q60759, Q9CZU6, Q922H2, Q8BGV0, Q99M87, Q91ZA3, Q3U186, P47738, Q8BIJ6, Q99NB1, Q8CFI5, P45952, Q8CGK3, Q61425, Q8CHT0, Q3ULD5, Q64373, Q9WUM5, Q9D051, P16332, Q9JHS4,…	4286	188	19662	2.87938	3.80451e-30	1.72932e-31	1.37233e-31
GOTERM_CC_DIRECT	GO:0042995~cell projection	294	6.65309	1.17998e-32	P55821, Q9ES28, Q810U4, Q9WV31, Q922J3, Q9R0X5, Q61315, Q9QXZ0, Q8BKX1, Q9Z0P5, Q9Z0P4, Q3UHC7, P18760, Q5SXA9, Q99J45, Q8C7M3, Q61553, Q66L44, P70429, Q7TMB8, Q6R891, Q9JM76, Q9QXJ1, Q9CQD1, Q6ZQ29, P61027, P20152, O35927, Q8K0X8, P60853, Q2TBE6, Q60598, Q6PB44, Q99J31, P98200, Q8CC35, Q9EPL2, Q3UTJ2, Q62419, Q8BLY3, Q62418, Q8K2K6, P59999, Q3V3V9, P70414, Q6EDY6, P62484, P62482, O88447, Q9DBS9,…	4286	712	19662	1.89427	1.3204e-29	5.74087e-31	4.55576e-31
GOTERM_CC_DIRECT	GO:0005840~ribosome	117	2.64766	2.02839e-32	P62918, P97461, Q8BK72, Q9ER88, Q9CQ40, P62082, Q80ZK0, P62751, Q80ZS3, Q9D1B9, P62911, Q9D7N3, P25444, P47911, P63325, P62754, P97351, Q9CR57, Q9CPR5, Q9D1R9, Q9JJI8, P14206, Q9CPR4, P18653, P62242, O55142, P62245, Q9DCU6, P84099, Q9D1I6, P62889, Q6ZWX6, P60867, Q9CZM2, P53026, Q922H1, Q6ZWV3, Q9D0G0, Q9DB15, Q9CQJ6, Q924T2, Q6ZWU9, Q9D1H8, P05555, P51410, Q9D338, P62270, P14148, Q99N96, Q9CQR2,…	4286	188	19662	2.85498	2.26977e-29	9.45737e-31	7.50505e-31
GOTERM_CC_DIRECT	GO:0043197~dendritic spine	100	2.26296	4.25213e-32	Q9WV31, Q8BWG8, P06537, Q8BKX1, Q9Z0P4, Q9Z2D1, A2AHG0, A2A5R2, Q01097, Q6R891, Q9QXJ1, P47757, Q8K596, B9EKR1, P60853, Q99J31, Q60598, P35802, Q8CC35, P30999, Q9QWY8, P35922, P12023, P31324, P70414, Q9QXS6, Q03137, Q6PEB6, Q6PFD5, Q80UW2, Q62108, Q9DCL8, Q8BIZ1, Q6NXK8, Q9Z0J4, D3YZU1, P23927, B2RUJ5, Q80TE7, P62137, Q60610, P61979, Q9WTS5, Q9WV60, Q9Z2W9, Q7TSK2, Q3UVX5, O08586, P23818, P23819,…	4286	148	19662	3.09966	4.75813e-29	1.90325e-30	1.51036e-30
GOTERM_CC_DIRECT	GO:0008021~synaptic vesicle	90	2.03666	8.61655e-32	Q5RJI5, Q69ZS6, Q8R5M8, Q9JKD3, Q9Z2D1, P51863, Q8C7M3, Q01097, Q8BLE7, Q7TQF7, O88935, Q8BPN8, P61264, P63044, O88533, Q9CQD1, O88531, P98084, O35526, Q8BG39, Q9Z2Q6, P60904, Q920I9, P51791, P70296, Q9CR51, P70452, Q7M6Y3, Q9ES56, Q8BYR5, Q60673, O55100, O35633, P39053, P47708, P24529, P63011, Q9JIS5, Q8BJI1, Q8K021, P63017, Q9DBS2, P46096, P60879, Q62108, P48036, P46097, Q9R1T4, Q8JZP2, Q9R0N3,…	4286	126	19662	3.27678	9.64192e-29	3.70843e-30	2.94288e-30
GOTERM_CC_DIRECT	GO:0031410~cytoplasmic vesicle	267	6.04209	9.07724e-30	Q9WV31, Q922J3, Q9JKD3, P97467, O70492, P17427, Q8C7M3, Q66L44, P49817, P47759, Q5KU39, Q9JL56, Q9CQD1, Q6ZQ29, P61027, Q8CBC4, Q5SYD0, Q2TBE6, Q9JKC8, Q6PB44, Q62418, Q8K2K6, Q7M6Y3, Q8BYR5, Q8BVL3, Q8BXQ2, Q80TN5, O88447, P24529, P42859, Q9QXK3, Q8BPQ7, Q9Z1T1, P47867, Q9DBS2, Q5XJY5, Q9WVE8, Q91VR7, P46096, Q6PF93, P97441, Q9Z1T6, P46097, Q9CX00, Q9EPK2, Q9ET22, Q3TXX4, Q8R361, Q04735, O35387,…	4286	646	19662	1.89607	1.01574e-26	3.76201e-28	2.9854e-28
GOTERM_CC_DIRECT	GO:0045211~postsynaptic membrane	126	2.85132	2.21544e-29	Q9WV31, Q8BWG8, Q8VHW2, Q14B80, Q3V0I2, Q6PAJ1, A2AHG0, Q01097, Q14BI2, Q80U04, Q9QXJ1, Q80TG9, B9EKR1, P60853, Q8BJ42, Q8CC35, Q9EPL2, Q8BLY3, O08715, Q7M6Y3, Q6WVG3, Q8BYR5, P35922, Q9QXS6, P39054, Q03137, Q9QWI6, Q6PFD5, E9PZ19, Q8R4I7, Q62108, Q50H33, Q8BIZ1, Q2WF71, Q80T41, Q99M87, Q61772, D3YZU1, Q9JM52, P62812, O88952, Q80TE7, Q3TES0, P52189, Q9WTS5, Q8CI51, Q8VBX6, Q9Z2W8, Q8JZS0, Q60613,…	4286	222	19662	2.60371	2.47908e-26	8.85385e-28	7.02611e-28
GOTERM_CC_DIRECT	GO:0005874~microtubule	156	3.53021	3.23827e-25	Q922J3, A2AQ07, Q61315, Q9QXZ0, P10637, Q8BUK6, Q9Z0H8, Q6PER3, P70302, O08788, O08553, P63168, O88735, Q8K0X8, Q8K596, Q9JJZ2, Q9DCV4, P05213, Q60875, Q80TV8, Q6S5J6, Q921G8, P35922, Q61166, P54227, P70414, Q5SQM0, Q3TRR0, Q9DBS5, P39054, P39053, P62482, O88447, Q6PGN3, O88448, Q9Z2V5, Q9JHU4, Q8K341, Q8CIP4, Q8BK67, Q3TVI8, Q8BYA0, Q91VR7, Q14BB9, Q2NL51, Q8BTG3, Q61771, Q9D4F8, Q9CWF2, Q9QXL2,…	4286	327	19662	2.18853	3.62362e-22	1.24953e-23	9.9158e-24
GOTERM_CC_DIRECT	GO:0030027~lamellipodium	97	2.19507	1.29297e-24	P55821, Q9ES28, Q91ZT5, Q61315, Q9Z0P5, P18760, Q99J45, Q9JKL5, Q61553, Q01768, P70429, Q7TMB8, Q6R891, Q9JM76, Q9QXJ1, P47757, B9EKR1, Q60598, Q60634, P30999, Q3UTJ2, Q62418, Q69ZX8, Q80UP3, Q3V3V9, Q8K4G5, Q6EDY6, P62484, Q3UQ44, Q9QXS6, P39054, Q9QWI6, Q6P9S0, Q9EPC1, P42337, Q9WTR1, P70280, P60879, P28660, Q9Z0R4, Q6PDN3, Q62188, P34152, Q9QVP9, Q64096, O35387, Q61301, Q9WUM3, Q61140, Q9WUM4,…	4286	164	19662	2.71333	1.44683e-21	4.82276e-23	3.82718e-23
GOTERM_CC_DIRECT	GO:0030426~growth cone	95	2.14981	1.4222e-24	P55821, Q61037, Q9ES28, Q61315, P27671, Q61879, Q9Z0P5, P10637, Q69ZK0, P15209, Q8BTM8, Q9CPW4, P97427, P70302, Q9QYX7, Q61553, Q8CBW3, P14873, Q66L44, O08553, P13595, Q9CVB6, Q6R891, Q9JM76, Q9QXJ1, Q920R0, A2A8L5, P01831, Q91Z31, P63005, Q9ESN9, Q99KJ8, P49615, B9EKR1, Q60598, P97792, P30999, P70175, Q8VCX6, Q9D394, Q9JKK7, P35922, Q9EQZ6, Q9JMK2, P12023, Q80TR1, Q06890, Q08509, Q9QXS6, Q6ZPF3,…	4286	159	19662	2.74096	1.59144e-21	5.13367e-23	4.0739e-23
GOTERM_CC_DIRECT	GO:0005794~Golgi apparatus	400	9.05182	1.79218e-22	P55821, P29533, Q8R3I3, Q9QXZ0, Q9ER00, Q9CR64, Q9CQU3, Q5KU39, Q99KF1, Q80U04, Q9JLV5, Q9DC51, P61027, Q91W50, Q9Z1S3, Q3U0D9, Q8K0X8, Q91W53, Q2TBE6, P98200, Q9EPL2, O70480, Q7M6Y3, Q80WT5, Q99MI1, Q9JK23, O35598, Q80TN5, P42859, Q8BPQ7, Q9Z1T1, Q5XJY5, Q9DBS1, P50396, P46096, P07724, Q9Z2V6, Q14BB9, Q9EPK2, Q64362, Q9ET22, P53668, Q9CQ22, Q99104, Q9JM52, Q8BRT1, Q91ZZ3, Q5XJV6, Q9EPJ9, Q9Z2W1,…	4286	1190	19662	1.54201	2.00544e-19	6.26701e-21	4.97329e-21
GOTERM_CC_DIRECT	GO:0005783~endoplasmic reticulum	435	9.84386	2.55553e-22	P29533, Q8R3I2, Q9CR67, O70251, O70252, Q3TZZ7, Q9R1J0, Q3U7R1, Q9CS84, C0HK80, Q99LH2, Q99KF1, P37040, Q80U04, P61022, P16460, P61027, Q9Z1S3, Q3U0D9, Q9EPL2, Q80WT0, Q8VHE0, Q9JK23, P42859, Q9DBS9, Q8BMK4, Q3TDN2, Q8BYB9, Q7TQ95, Q5XJY5, Q9DBS1, Q9Z0R9, Q91X58, Q9D1Q6, P07724, P48036, Q61097, Q62186, P51125, Q99104, Q9JKR6, Q9WUD1, O35387, Q3TDQ1, Q91YX5, Q5NCF2, Q8R5J9, Q3TY86, Q8CGZ0, O35381,…	4286	1323	19662	1.50836	2.85963e-19	8.66556e-21	6.87669e-21
GOTERM_CC_DIRECT	GO:0043195~terminal bouton	73	1.65196	7.51156e-22	B2RQC6, P12658, Q14B80, P15209, Q68ED2, Q62442, Q9QYX7, Q01097, Q8CHC4, O08553, Q7TQF7, O88935, O08599, Q4KUS2, O09044, P63044, Q9CQD1, Q9JJV2, Q8BG39, Q9Z2Q6, P60904, Q99J31, Q61644, P51150, Q9Z1G4, P12023, O55100, Q9JKK1, O54774, P24529, P63011, Q9JIS5, P63330, Q8K021, P63017, Q08460, P46096, P60879, P32848, Q9Z0R4, P46097, P11627, P80560, Q68FD5, Q9R0N3, P35438, O55042, P84091, P35436, Q9R0N7,…	4286	113	19662	2.9636	8.40543e-19	2.47219e-20	1.96184e-20
GOTERM_CC_DIRECT	GO:0042470~melanosome	67	1.51618	4.93723e-21	Q9WTT4, P97384, P07901, Q9CR67, P19096, P18242, O08547, P63001, O35887, P09055, O08992, P61021, Q9CQD1, P08003, P07356, Q922R8, Q8BHN3, O89023, P60904, P10605, O08917, Q91YQ5, P11499, P18572, Q9Z1G4, O08638, P35564, Q9R0M6, O55100, O35874, P24369, P09103, P63017, Q9WTR1, P27773, P54116, Q9WU78, Q78PY7, Q68FD5, P35278, P10852, P63101, Q99104, Q99P58, P17809, P62814, P27601, P97370, P62259, Q9D1D4,…	4286	101	19662	3.04319	5.52476e-18	1.5785e-19	1.25265e-19
GOTERM_CC_DIRECT	GO:0000502~proteasome complex	51	1.15411	1.14721e-20	P54775, P46471, Q8BG32, P62196, Q9Z2U1, Q9Z2U0, Q9CX56, O08759, O70481, P14602, P14685, Q922Y1, Q9QUM9, P49722, O88685, Q8CDN6, Q9D8W5, O70435, P99026, Q9R1P0, P56695, O35593, Q8VDM4, Q9WUP7, Q9R1P1, Q9R1P4, Q9WVJ2, Q9R1P3, Q9CR00, P61290, Q6PDI5, O35226, Q8BHL8, O55234, Q9JKV1, P26516, P62334, O09061, P97371, P97372, Q3TXS7, Q9JMA1, P70195, Q91WG4, P54728, P62192, P54726, Q60692, Q01853, Q99JI4,…	4286	66	19662	3.54488	1.28373e-17	3.56591e-19	2.82979e-19
GOTERM_CC_DIRECT	GO:0042734~presynaptic membrane	55	1.24463	1.82103e-20	P0C192, Q14B80, P97300, Q68ED2, Q9CS84, Q01097, P16388, Q14BI2, Q4KUS2, P61264, Q9QXJ1, Q69ZK9, O35526, Q2TBE6, Q9Z1S5, P48320, Q8BLY3, Q6P9K9, Q7M6Y3, Q6WVG3, Q8BYR5, P35922, Q80TR1, Q80TN5, Q8K382, P47743, P46096, P60879, P11627, Q50H33, Q9JKF6, Q80U23, Q9WV18, P35436, Q9R0N7, Q6PH08, P39087, P63141, Q5DTY9, O70589, P97772, Q61548, Q60613, P11798, Q62277, Q9QYS2, P23819, Q99P47, Q62083, P21836,…	4286	75	19662	3.36416	2.03773e-17	5.50738e-19	4.37047e-19
GOTERM_CC_DIRECT	GO:0070469~respiratory chain	46	1.04096	1.85972e-19	Q9Z1P6, Q9D0M3, Q8BK30, Q9CQ69, Q9CR68, Q62425, P03888, P03921, Q8K3J1, P99028, Q9DCJ5, Q9CR61, Q7TMF3, Q91WD5, Q99LY9, Q9CR21, Q9D8B4, P00405, Q9CZ13, Q9CQH3, Q9DC70, Q9D6J6, Q8R1I1, Q9DB77, Q9D6J5, P62897, Q9DCT2, Q91YT0, Q9CQJ8, Q9CPP6, P03911, Q9D855, Q9CQZ6, Q9CQZ5, P52503, Q9CQ54, Q9CQ75, Q9CXZ1, Q9DC69, Q91VD9, O09111, Q9CQ91, Q9DCS9, Q99LC3, Q3UIU2, P00397	4286	58	19662	3.63836	2.08102e-16	5.47638e-18	4.34587e-18
GOTERM_CC_DIRECT	GO:0005769~early endosome	111	2.51188	2.07312e-19	P29533, Q9R1R2, O70492, O70493, P51863, Q07113, Q80U87, Q5KU39, P61021, Q3UR70, Q9CQD1, P07356, Q8R307, A6H6A9, Q6PB44, Q62418, Q9D074, Q8BVL3, Q9JKK1, P67778, Q80Z10, Q9WVE8, Q8C0E2, P42567, Q8R361, Q99104, Q80TM9, Q8VDD8, Q63844, P97333, Q6P9Q6, Q921E2, Q3UHD6, Q3U0M1, Q6PGL7, P23818, O88307, Q8VHK5, Q8R516, O70228, Q8BL66, Q810B6, P62821, Q6PD31, Q63932, Q6KAU4, Q8BLE7, P52479, P63085, Q9CPW0,…	4286	226	19662	2.25315	2.31983e-16	5.94827e-18	4.72034e-18
GOTERM_CC_DIRECT	GO:0005654~nucleoplasm	577	13.0573	1.1751e-18	Q5RJI5, Q9D2U9, P06537, O70133, Q9Z0P4, Q505D1, Q80Y81, Q9R0H0, Q6PDG5, Q9DAR7, Q80W47, Q52KI8, P63328, Q9Z2U1, P61148, Q8QZY1, Q569Z6, Q7TN29, Q9EPL8, Q6X893, Q920E5, Q80WT5, Q921G8, Q80UP3, Q3TY60, Q9JK23, Q9R0I7, Q9JKS5, P42859, Q8K183, Q9Z130, Q8BP00, Q8BTY1, Q3UIU2, A2ADY9, Q9WVE8, Q99LG4, Q921F2, Q9CQ26, Q8R3G1, Q6P3D0, Q91VR5, P28661, Q9Z2V6, Q8CF89, O70591, G5E870, P53668, P61290, Q8JZK9,…	4286	1935	19662	1.36795	1.31493e-15	3.28733e-17	2.60871e-17
GOTERM_CC_DIRECT	GO:0005741~mitochondrial outer membrane	83	1.87825	5.09331e-18	Q3KNM2, Q8JZR0, Q9CZW5, Q99JY0, Q9CZW4, P97742, Q8BKC8, Q8BSK8, Q9JLN9, Q62167, Q4QQM5, Q9DCN2, Q8BX10, O35129, Q8BGD5, Q8BXV2, Q8BW75, P63087, P16460, Q8BGH2, Q8BZA9, P48962, Q9CZR3, P41216, Q8K4X7, Q64516, P23242, Q91YI0, Q2YDW2, Q6X893, Q8K1M6, P70296, P04925, O08715, Q8R5H6, Q9CQX2, P15532, P17710, Q07813, Q03137, Q9CYG7, Q8R1X6, Q922Q1, O88441, Q9D6K5, Q9QYA2, Q8BG51, Q924D0, Q6PCP5, Q9CPQ3,…	4286	153	19662	2.48864	5.69941e-15	1.3901e-16	1.10314e-16
GOTERM_CC_DIRECT	GO:0015629~actin cytoskeleton	99	2.24033	1.58897e-17	Q91ZT5, Q9WV31, Q9WV32, Q9QXZ0, Q8BKX1, P49025, P18760, Q9R0P5, Q61553, Q6DFW0, O55131, Q6R891, Q8C0P5, Q9CQD1, Q91YR1, Q99J31, Q8CC35, Q9R0Q6, P59999, Q3V3V9, Q8K4G5, Q7TSE6, Q9QXS6, P05064, Q9QWI6, Q920M5, Q9EPC1, P60879, Q91W39, Q9DBR7, Q8VDD5, O35387, Q80TE7, P42208, Q9D0F9, Q8K298, Q80UG5, Q99JB2, Q2KN98, Q61301, Q8CI51, Q80YE7, Q9WUM3, Q61140, Q64010, Q9WUM4, Q4VC33, P60487, Q9DAW9, Q8BL65,…	4286	201	19662	2.25951	1.77806e-14	4.23347e-16	3.35954e-16
GOTERM_CC_DIRECT	GO:0005802~trans-Golgi network	85	1.92351	7.43687e-17	Q9JMH9, Q6ZPR5, P97467, Q8BTM8, Q9QXV0, Q8BVI5, Q9D289, A2A5R2, Q07113, Q9QYX7, P63001, Q7TQF7, O88737, O35643, O88738, P70704, Q922R1, Q8CHG3, P63044, B9EHT4, Q02819, P61027, Q8CBC4, P22892, Q9DCR2, Q9QZB1, Q6NVF0, Q61644, P98200, Q922Q9, Q920M7, O70480, P70452, Q9DBG3, G3X9K3, Q80XR2, Q99M51, Q8C5L6, Q9CRA5, Q9JKK1, O54774, P39054, Q9D4C9, O35598, Q9JJ43, Q9Z1T1, Q8K021, Q923S9, Q6IRU5, Q9WVE8,…	4286	164	19662	2.37766	1.24234e-13	1.93531e-15	1.5358e-15
GOTERM_CC_DIRECT	GO:0043231~intracellular membrane-bounded organelle	261	5.90631	1.75181e-16	Q9WUR2, Q921H8, Q9Z0P4, Q9CZW4, O70370, G3XA57, Q62086, O70252, Q9R1J0, Q99K67, Q9CQU5, Q9R0H0, P37040, Q9DC50, Q9D4H1, O88455, Q6ZPQ6, Q2TBE6, Q9Z127, Q60598, Q8K2K6, Q6QD59, Q80WT5, Q8VDN2, Q8BYR5, P39688, Q8BVL3, Q99KE1, O35598, Q80TN5, P32020, P47740, P56371, Q5XJY5, Q9WVE8, Q61411, Q6P2B1, P46097, Q7TPV4, Q6DIC0, Q9DCD0, P70441, Q9ET22, P15105, Q9CQ22, Q99M87, Q8R361, Q9CQB5, P22437, O35387,…	4286	751	19662	1.59432	2.48468e-13	4.45517e-15	3.53547e-15
GOTERM_CC_DIRECT	GO:0005911~cell-cell junction	96	2.17244	8.29198e-16	Q63932, Q8R5M8, Q8BTM8, Q9Z2H5, P18760, O35691, Q62165, P19137, Q99JY9, Q61553, Q80TS3, Q3UU96, P13595, Q8CHG7, O09044, P09055, Q02257, P47753, P61027, O35607, P07356, Q91YR1, Q9EQJ9, P05532, Q9Z0U1, Q8BLU0, Q8BH43, Q8C180, Q60631, P26231, P97792, P23242, O08917, P30999, P70175, O35682, Q6S5J6, P39447, P12023, Q3V3V9, Q66T02, Q99M51, Q8K3E5, A2ALU4, Q5DTX6, Q9QXS6, P57780, P41241, Q99N28, Q9JIS5,…	4286	201	19662	2.19104	8.69638e-13	2.06194e-14	1.63628e-14
GOTERM_CC_DIRECT	GO:0005747~mitochondrial respiratory chain complex I	37	0.837294	1.71281e-15	Q9Z1P6, Q8BK30, Q62425, P03888, Q8K3J1, Q9ERS2, Q9DCJ5, Q9CR61, Q7TMF3, Q91WD5, Q99LY9, Q9CR21, Q9D8B4, Q9CQH3, Q9DC70, Q9D6J6, Q9D6J5, Q9DCT2, Q91YT0, Q9CQJ8, Q9CPP6, Q99LX0, P03911, Q9CQZ6, Q9CQZ5, F6W8I0, P52503, Q9CQ54, Q9CQ75, Q9CXZ1, Q9CQC7, Q9DC69, Q91VD9, O09111, Q9CQ91, Q9DCS9, Q99LC3, Q3UIU2	4286	47	19662	3.61143	1.86351e-12	4.16661e-14	3.30648e-14
GOTERM_CC_DIRECT	GO:0043198~dendritic shaft	43	0.973071	4.55476e-15	Q91V14, Q69ZK0, Q8BTM8, Q6NXK8, Q9WV18, P59644, Q68ED2, F6SEU4, Q9CVB6, O55017, Q69ZK9, P20357, Q9Z2Y3, P60853, Q9Z0G0, Q60875, P46460, Q9WV60, Q9Z2W9, P70175, O35382, Q7TSK2, P35922, P12023, P31324, Q80WT0, Q99K10, Q3UVX5, P70414, P23818, O88704, Q9QXS6, P23819, O88703, D3YVF0, Q02248, Q8BR86, Q3UYH7, P63017, Q01815, P49769, Q99MK8, P43006	4286	61	19662	3.23381	5.09359e-12	1.08442e-13	8.60559e-14
GOTERM_CC_DIRECT	GO:0005622~intracellular	475	10.749	1.07126e-14	Q9ES28, Q9CQ48, P06537, P49025, Q9Z0P5, Q9Z0P4, Q9CQ40, Q9ER00, P18760, Q9CR64, P63321, Q5KU39, Q80U04, P61264, P61021, Q6P9R2, P61027, Q9Z1S3, Q3U1F9, P97471, Q9Z1S8, P97351, Q8R5L3, Q9CR57, Q9EPL8, Q9CR51, Q7M6Y3, Q80WT5, Q80UP3, Q9CPR4, P18653, Q99LG2, P62242, Q5SSZ5, Q5SRX1, Q6PGN3, Q8BPQ7, A6H5Y3, Q91Y86, P50396, P52332, P28663, Q9EPK7, Q9Z1T6, Q9Z0R4, P48036, Q61097, Q9CPQ3, Q9R1L5, Q9DB15,…	4286	1599	19662	1.36276	1.19265e-11	2.49738e-13	1.98183e-13
GOTERM_CC_DIRECT	GO:0030672~synaptic vesicle membrane	41	0.927812	2.49653e-13	P46096, P97441, Q69ZS6, P46097, Q9JKD3, P80560, Q8JZP2, Q9R0N3, Q3TXX4, Q7TNF0, Q9R0N5, Q62442, Q9R0N7, Q8BLE7, Q66L44, Q9R0N8, O88935, Q7TQF7, Q8BPN8, Q922R1, P63044, Q920N7, Q8BFT9, O35526, Q8BG39, Q2TBE6, Q9Z266, P97411, Q8K1M6, P48320, Q64373, Q64332, P32037, Q62277, O55100, P46638, P23819, P47708, Q9JIS5, Q8BJI1, Q8K021	4286	61	19662	3.0834	2.79402e-10	5.70126e-12	4.52432e-12
GOTERM_CC_DIRECT	GO:0044297~cell body	57	1.28988	2.89542e-13	Q9CXW3, P12658, P10637, P70425, O55131, P20152, P20357, P62874, P62754, P60853, P03995, P97792, P29387, Q99LX0, O70443, P68033, P35922, Q9R0M4, P62880, P62881, P42932, P17879, Q03137, O55026, O09131, Q9Z2V5, P63216, Q9WTR1, P51880, P99024, P26040, P11983, Q9R0N3, Q62188, P68040, P15105, Q9CYN9, P51807, Q9QVP9, Q8K4Z3, P62737, Q91V12, P80315, P80314, P80313, Q9WV60, Q9ERR1, P18872, O88587, Q9Z275,…	4286	102	19662	2.5636	3.24002e-10	6.47995e-12	5.14227e-12
GOTERM_CC_DIRECT	GO:0031901~early endosome membrane	51	1.15411	5.05056e-13	Q9D8U8, Q9Z2D1, O70492, Q91YJ2, P52875, P63001, Q6P4T1, Q9JJR8, Q6P8X1, Q6PHS6, P61021, Q8C996, B9EHT4, Q8K273, Q9WV80, Q2TBE6, Q6NVF0, Q62419, P51791, P70297, Q01279, Q9CWK8, Q03137, Q9D4C9, Q920Q4, Q8BK67, Q8K337, Q9Z1T6, Q8K3H0, Q8BG92, P35278, Q9D387, Q62421, P42567, Q8R361, Q8K3G9, Q8VDD8, O70439, Q8C080, P10107, P59016, Q3UHD6, Q9EQP2, Q6PGL7, Q80Y17, Q9WVK4, Q80Y56, Q91V41, Q99LI8, O70228,…	4286	87	19662	2.68922	5.6514e-10	1.10815e-11	8.79391e-12
GOTERM_CC_DIRECT	GO:0043204~perikaryon	73	1.65196	9.99107e-13	Q61831, Q14B80, P97467, P15209, Q80TS7, P56959, P14873, P16388, Q9CVB6, P63085, P23506, P16460, P31938, O35927, P49615, Q2TBE6, Q9WTU6, Q60676, P28652, Q91YI0, Q8CC35, Q04750, Q9D394, Q9Z2A0, P14602, P35922, Q3V3R4, Q60673, O08600, Q80Z10, Q61290, Q03137, P24529, O88569, Q9Z2V5, Q91Y86, P63017, Q9Z0V2, P54830, Q80ZD8, Q61137, Q91V14, P48036, P97445, Q8VDQ8, P68040, P15105, P23927, P39087, P63141,…	4286	150	19662	2.23258	1.11798e-09	2.15e-11	1.70617e-11
GOTERM_CC_DIRECT	GO:0005681~spliceosomal complex	68	1.53881	1.3237e-12	Q9Z315, Q8QZY9, Q9Z1N5, Q8BTI8, Q91YR7, Q923D5, Q923D4, O35691, Q9D883, Q6P4T2, O35841, Q922V4, Q52KI8, P62317, Q8VDW0, Q91Z31, P62315, Q9Z204, P27048, Q9D554, O88291, P29341, Q6PDM2, O35286, Q62376, P62320, Q3TIX9, O88569, Q922U1, P63017, Q61136, Q8R3G1, Q99NB9, Q61656, Q9CZU3, P57784, Q8VEK3, Q62189, Q6ZWM4, Q99KP6, Q6A068, Q8K4Z5, Q921J2, B2RY56, Q9CSN1, Q8BHS3, P61979, P49312, Q6DID3, Q64012,…	4286	136	19662	2.29375	1.48124e-09	2.79476e-11	2.21783e-11
GOTERM_CC_DIRECT	GO:0010008~endosome membrane	63	1.42566	1.57916e-12	Q9CR26, Q8BGT6, P15209, Q9ER00, O70492, Q80WQ2, P52875, Q5KU39, P58021, Q9CQ80, Q8C754, Q9CQD1, B9EHT4, P46467, Q9WV80, P97390, Q6ZQK5, Q8R0J7, P51150, Q9JIG8, P35288, Q6PHU5, Q3ZT31, Q8BVL3, Q02053, Q9DBG5, Q01279, Q9CWK8, O54774, P61079, Q6NVE8, P0C0A3, Q8K386, P46735, O89051, Q9Z1T6, Q8K3H0, Q9D387, P41234, Q8K3G9, Q80XQ2, Q8CFE4, P35285, O88597, Q9EQH3, Q8R0H9, Q811P8, Q61187, Q8BMI3, Q9QZ88,…	4286	122	19662	2.36895	1.7671e-09	3.27236e-11	2.59683e-11
GOTERM_CC_DIRECT	GO:0005905~clathrin-coated pit	39	0.882553	4.92437e-12	Q8BWG8, P98156, Q91ZX7, Q9Z0R4, Q80TY0, Q68FD5, P17427, P17426, P84091, P42567, Q3UHJ0, Q8CDA1, Q60902, Q9DB50, P61967, Q60598, Q6NVF0, O54916, Q61548, Q8K1M6, Q9CR95, Q9DBG3, Q7M6Y3, Q80VP1, Q64331, Q62351, Q6PHU5, Q8VD37, Q3UQN2, P12023, P39054, O08585, Q9JKY5, P63038, Q921I1, Q8K341, Q6IRU5, P62743, Q6PHN9	4286	60	19662	2.98187	5.5104e-09	1.00188e-10	7.95062e-11
GOTERM_CC_DIRECT	GO:0032587~ruffle membrane	46	1.04096	1.11669e-11	P07901, Q3UUI3, Q61315, P70182, Q9QXZ0, O08808, P26040, Q3UTQ8, Q61097, P18760, Q5SXA9, Q9JKL5, Q61233, Q9QXV8, P63001, Q6R891, P09055, Q61081, Q8BRT1, Q91YR1, P26039, B9EKR1, P62908, Q60610, Q61644, Q7TPS5, Q60875, O70161, Q8BUL6, P10126, Q64331, Q64455, P15532, Q8C5L6, Q9QUI0, Q08509, P43406, P39054, P58771, P05480, Q9WTI7, O88643, P60487, Q9JKY5, Q9WVE8, Q9QUG9	4286	79	19662	2.6712	1.24957e-08	2.23139e-10	1.77075e-10
GOTERM_CC_DIRECT	GO:0030175~filopodium	45	1.01833	1.63102e-11	P29533, Q91ZT5, P60879, P26041, Q8BKX1, P26040, P26043, Q9Z0P5, Q9Z0P4, Q5EBJ4, P70441, Q62165, Q03173, Q61233, Q61553, Q8CBW3, Q6R891, P09055, Q61739, F8VPU2, Q80TE7, P62737, Q91YR1, P49615, B9EKR1, Q9JI91, P97792, Q7TSS2, P35802, Q9WTS5, P68033, Q9D394, Q9ET54, Q9R0M4, P11531, P62484, Q3UQ44, Q9QXS6, Q6ZPF3, Q03137, Q9Z2C5, Q9QWI6, Q9JHU4, P46735, P60766	4286	77	19662	2.681	1.82512e-08	3.20196e-10	2.54096e-10
GOTERM_CC_DIRECT	GO:0030117~membrane coat	25	0.565739	1.83434e-11	Q9QZE5, P61924, Q9JIF7, Q68FD5, P17427, P17426, Q8CHC4, O35643, Q8CIE6, Q9D8B3, Q9DB50, P22892, Q9DCR2, Q8BSZ2, Q9DB34, P61967, Q9JME5, Q9DBG3, O88848, O54774, P39053, Q9QXK3, Q9Z1T1, O55029, P62743	4286	30	19662	3.82291	2.05263e-08	3.53901e-10	2.80844e-10
GOTERM_CC_DIRECT	GO:0005765~lysosomal membrane	97	2.19507	2.23525e-11	Q8BVE3, Q8VC42, Q9JLN9, P51863, Q07113, Q9JJR8, Q8BXR1, Q5KU39, Q8VEH3, Q9DC51, P07356, Q8R307, P62874, Q8K0P3, Q2TBE6, Q9JKC8, P60904, Q8R5L3, Q91VK4, P29387, Q9CR51, P17439, Q02053, P62880, P17047, O35114, Q8C1Y8, Q9Z1T1, P49769, P70280, P97441, P97449, Q9CQ22, P57746, Q04857, P41234, Q8K1X1, Q91WC9, P62814, Q61147, Q8K448, Q9Z266, P06802, P59016, P63082, P14824, Q80VP0, Q9D8V0, Q61542, Q8BY89,…	4286	234	19662	1.90165	2.50125e-08	4.2394e-10	3.36425e-10
GOTERM_CC_DIRECT	GO:0001726~ruffle	51	1.15411	4.27596e-11	Q9ES28, Q922J3, Q9D8U8, P49025, Q8BKX1, Q71LX4, P63094, Q9JKL5, Q60780, Q61233, Q61553, Q01768, Q7TMB8, Q920R0, Q9CQD1, Q5FWK3, P07356, Q6ZQK5, Q8BH43, Q60598, Q62418, O35682, Q9R0M4, P70335, Q3V3V9, Q8C5L6, Q5DTT2, O88643, Q8K221, Q6P9S0, Q7TPR4, P26040, P26043, P70441, Q9JKF1, P59644, P50114, P62331, Q99104, Q8VDD5, P35285, P62814, P26039, Q91ZM2, Q61140, Q9ET54, Q64331, Q62077, P63034, P13020,…	4286	95	19662	2.46276	4.7848e-08	7.85319e-10	6.23202e-10
GOTERM_CC_DIRECT	GO:0060076~excitatory synapse	28	0.633628	4.281e-11	P46096, Q62108, Q8R4I7, P15209, Q9R0N3, Q8BYM5, Q3TXX4, P35438, D3YZU1, Q99JY9, Q9CS84, Q8BLE7, O88737, Q99PJ0, Q8C8T7, Q4KUS2, Q4ACU6, A2A8L5, Q69ZK9, Q8K377, Q9Z2Y3, B0F2B4, Q9EQZ6, Q62277, Q99K10, P23818, Q8BGA3, Q9QXS6	4286	37	19662	3.47162	4.79045e-08	7.85319e-10	6.23202e-10
GOTERM_CC_DIRECT	GO:0030018~Z disc	61	1.3804	5.00095e-11	P48453, Q6NZM9, P04919, Q01097, Q6NSW3, Q9WUB3, Q02257, P63328, P47757, Q9Z2Y3, Q80X90, Q8CC35, P56565, Q3UTJ2, Q9WTU3, Q6PD03, A2APX8, P14602, Q9Z2I2, P16546, Q3THE2, P11531, P70414, P57780, Q9DC07, Q02566, Q02248, O88643, P05064, Q3UYH7, Q9EPC1, O70433, Q7TPR4, P26883, Q8BG95, Q64727, Q9ES46, P48036, Q9Z0J4, Q9DBR7, P23927, Q8C8R3, Q02357, Q9WUD1, G5E8K5, O54946, E9Q401, Q3URD3, Q91ZU6, Q9JI91,…	4286	124	19662	2.25675	5.59606e-08	9.0259e-10	7.16265e-10
GOTERM_CC_DIRECT	GO:0031982~vesicle	74	1.67459	6.42167e-11	P55821, Q61598, Q07076, P55302, Q14B80, Q9ER00, P34884, P16858, P18760, P63094, Q6KAU4, Q9CS84, Q920R0, P63044, P52480, P61982, Q9WV80, P07356, P63005, Q99KJ8, Q80TZ3, Q60875, Q60634, P21460, Q61768, Q8K1E0, Q7M6Y3, P35762, P62880, Q08509, Q9QUI0, O88447, Q8C1Y8, O88487, P56371, O88485, Q91Y86, Q9WVA4, P54116, P60879, Q99KY4, Q9WV55, P26041, P26040, Q80VQ0, P70441, Q9R0N3, P19157, Q9ET22, P31750,…	4286	164	19662	2.06997	7.18585e-08	1.14061e-09	9.0515e-10
GOTERM_CC_DIRECT	GO:0045121~membrane raft	104	2.35347	8.41806e-11	Q61037, P52795, P84309, Q7M6Z0, Q9D8Y0, Q9ER00, P18242, Q6A0D4, P70425, P49817, Q9DC51, Q9CQD1, O54724, B9EHT4, P09411, P07356, Q9QZF2, Q3U1F9, Q2TBE6, P35803, P08207, Q61327, Q60634, Q62417, Q99LX0, P04925, Q61165, Q8VDN2, P39688, P12023, P31324, P46935, P17710, P17047, P41241, Q9WTI7, O88444, P20444, P49769, Q9DCU2, P54116, P60879, Q8BYI9, Q9Z1T6, P70441, Q9CQ22, Q9Z0J4, Q9QVP9, P17809, Q99JB2,…	4286	262	19662	1.82099	9.4198e-08	1.47185e-09	1.16801e-09
GOTERM_CC_DIRECT	GO:0005635~nuclear envelope	71	1.6067	2.03391e-10	P54731, P50571, P97384, Q07076, Q922J3, P23198, Q9CR67, Q9ERU9, P49586, P55144, Q99P88, P11881, O08788, F6ZDS4, Q91YE6, Q3TDK6, Q80UU9, Q921T2, P63005, Q9DB34, P46061, O70325, Q9EPL8, Q9D517, Q6PFD9, Q9QY81, Q6VNB8, Q6QD59, Q99P72, Q8R1T1, Q9D1E8, P21619, Q07813, P48678, Q922Q8, Q9ERK4, Q9D1M0, Q8BJ71, Q9CX00, P11103, P14733, P70168, Q8K4B0, Q9CPU4, P22437, Q9D8B3, P08226, Q8K2V6, Q8C570, Q99NF2,…	4286	158	19662	2.06147	2.27595e-07	3.50146e-09	2.77864e-09
GOTERM_CC_DIRECT	GO:0098793~presynapse	38	0.859923	2.24494e-10	P97445, Q9R0N3, Q7TNF0, Q9CS84, Q8CHC4, O88737, Q4KUS2, O09044, O55017, P61264, O88952, Q9DB50, Q920N7, O35526, Q9ERB0, Q920M7, Q61327, Q8JZS0, Q61548, Q99LX0, Q8VD75, Q9Z1M0, P28571, O35681, Q6P9K9, Q8BYR5, P97813, P35922, Q04690, Q80TR1, Q99K10, Q8R570, Q8BZ60, Q9JM63, Q80TJ1, P47708, O88643, P49769	4286	63	19662	2.76706	2.51209e-07	3.8062e-09	3.02047e-09
GOTERM_CC_DIRECT	GO:0005938~cell cortex	66	1.49355	3.41835e-10	Q9ES28, P09405, Q61315, Q63932, Q9QXZ0, Q61879, Q8BTM8, Q68ED2, Q8VCM7, Q99J45, O55131, P49817, P31938, P61148, P07356, P63005, Q9Z2Q6, Q9QZB1, Q60598, Q80X90, Q7TPS5, Q62418, Q80TV8, Q9JL04, P46935, A2ALU4, Q08509, Q9QUI0, Q9QXS6, Q80Z10, Q8C863, Q02248, P48318, Q8K221, P62962, P26040, Q80TY0, Q5EBJ4, O55042, Q8CIB5, B9EJA2, Q9DCT8, P62331, P61161, Q8VDD5, Q9QVP9, Q8BRT1, P42208, E9PV24, Q5ND34,…	4286	144	19662	2.1026	3.82514e-07	5.63699e-09	4.47332e-09
GOTERM_CC_DIRECT	GO:0022624~proteasome accessory complex	17	0.384702	3.42552e-10	Q9D8W5, P54775, Q3TXS7, P46471, Q9CX56, Q8BG32, O35593, Q8VDM4, P62192, Q8BJY1, Q9WVJ2, P14685, Q99JI4, O35226, P62196, O88685, P62334	4286	17	19662	4.58749	3.83315e-07	5.63699e-09	4.47332e-09
GOTERM_CC_DIRECT	GO:0030136~clathrin-coated vesicle	36	0.814664	4.68779e-10	Q61335, Q61137, Q91ZX7, Q68FD5, Q8BG92, O70492, P42567, Q5KU39, Q99KN9, Q8CFE4, Q3UHJ0, O35387, P63044, Q9D2N9, P22892, Q8R307, Q6NVF0, P35846, Q61548, Q8VD75, P59016, Q7M6Y3, Q6PHU5, Q8VD37, Q3UQN2, Q9QZS3, Q8BZ60, Q80Z10, Q9D4C9, O08585, P42859, Q8K382, Q920Q4, Q8K021, Q9JKY5, Q91W86	4286	59	19662	2.79915	5.24564e-07	7.58e-09	6.01523e-09
GOTERM_CC_DIRECT	GO:1903561~extracellular vesicle	32	0.724146	4.74173e-10	Q5FWH7, Q9WU78, Q64727, Q6PIC6, Q68FD5, Q9R013, Q07235, P40240, O08992, Q6PIE5, Q9JK53, P52480, E9PV24, P08226, P62874, P35802, Q9Z2W8, P55012, P11835, P68372, Q62351, Q8VDN2, P16546, Q7TMM9, Q8K0E8, Q00623, P14094, O35474, P63011, P48758, P08752, Q91YW3	4286	49	19662	2.99591	5.306e-07	7.58e-09	6.01523e-09
GOTERM_CC_DIRECT	GO:0005789~endoplasmic reticulum membrane	225	5.09165	5.26192e-10	Q3KNM2, Q9CR67, Q6ZPR5, P55144, Q9CZW4, Q8VCM8, Q99J47, Q9R1J0, O08547, Q99LH2, Q99KF1, P37040, Q80U04, P61027, Q9Z1S3, P47758, Q9EPL2, Q3B7Z2, Q6QD59, Q80WT0, Q8VHE0, O54692, Q9DBS9, Q8BMK4, Q9CQC9, Q7TQ95, P47740, Q9Z0R9, Q9D1Q6, Q9WV55, Q8BTG7, Q61097, Q62186, Q3TFD2, Q91YH5, Q9CQB5, P22437, Q91YX5, Q99LF4, Q8R5J9, Q6PA06, Q64378, Q91WC3, Q3UN02, P20029, Q9DC29, Q811D0, P56395, Q9EQK7, Q69ZF3,…	4286	710	19662	1.45378	5.88808e-07	8.18665e-09	6.49664e-09
GOTERM_CC_DIRECT	GO:0001725~stress fiber	39	0.882553	5.26755e-10	Q62523, Q7TPR4, Q64727, Q61879, Q6PDN3, P35235, G3X9J0, Q8CIB5, Q03173, Q61233, Q61553, O55131, P21107, Q8VDD5, P34152, P07356, Q80UG5, P60710, Q9Z2Q6, Q91ZU6, Q80X90, Q8CC35, Q62417, Q9CQ19, Q8C1B7, P97434, Q9WUM3, O08638, Q9ET54, Q69ZX8, Q3THE2, Q8K4G5, Q8BPM0, P57780, Q9DC07, Q02566, P58771, Q6URW6, Q6IRU2	4286	67	19662	2.67033	5.89439e-07	8.18665e-09	6.49664e-09
GOTERM_CC_DIRECT	GO:0005770~late endosome	61	1.3804	7.96753e-10	Q8VD65, Q8BGT6, Q63932, Q8BH57, Q07113, Q6KAU4, Q91XL9, Q8CHG7, Q5KU39, P63085, P31938, P62835, O88653, Q8R307, P23242, Q922Q9, Q9WVQ1, P51150, P51791, Q9R0M6, P17047, Q80Z10, P42859, O89017, Q920Q4, Q6PGF7, P63017, Q91W86, Q91VR7, P97441, Q6PF93, Q8C0E2, Q8VEJ9, Q99104, Q6PDI5, P35285, Q9D2N9, P08226, O70439, Q8BGQ1, Q8C080, Q64337, Q63844, Q9EQH3, Q8K448, Q921E2, P59016, Q61187, Q68FE2, Q6PD24,…	4286	131	19662	2.13616	8.91566e-07	1.22132e-08	9.69201e-09
GOTERM_CC_DIRECT	GO:0019898~extrinsic component of membrane	45	1.01833	1.24022e-09	Q5H8C4, Q8BGT6, A2ALK8, P26041, Q9D8U8, Q9WV92, P26040, P26043, P97785, O70310, O70311, Q9Z2H5, O70492, O70493, P59644, Q91YJ2, P48193, F6ZDS4, Q6P5H6, Q9Z2H2, Q6P8X1, Q9R0N8, O88737, Q6P4T0, Q80W47, Q64096, F8VPU2, O88597, Q8BX70, Q9WV80, Q80XK6, O70318, Q91VM3, Q9Z1W9, P10107, Q8BH64, Q8CE50, Q6VNB8, Q8VBT9, O35678, Q9CWK8, P47708, P32020, Q80ZJ7, Q9WVE8	4286	85	19662	2.42867	1.3878e-06	1.87541e-08	1.48826e-08
GOTERM_CC_DIRECT	GO:0030496~midbody	60	1.35777	1.69961e-09	P97384, Q61879, P70268, Q6PER3, Q80U87, P63321, O55131, O88738, Q9Z0Y1, Q8VEH3, P63087, Q9DC51, P07356, B2RSH2, Q8R0J7, P30999, Q9D8X2, Q9QYY8, O35954, Q9QUI0, P39054, Q9JIW9, Q8R1X6, Q68FH0, Q80ZJ1, Q8BK67, P50396, Q6PF93, Q9CX00, Q9R1T4, P26043, Q80TQ2, Q8VDQ8, Q9JKF1, Q922H9, Q9CQW2, P68040, Q61771, Q9QUR7, Q8VEJ9, P62331, P84089, Q9WUL7, Q9D8B3, Q8R127, P17809, P42208, Q9QYB1, Q8BG40, Q6Y685,…	4286	130	19662	2.11731	1.90187e-06	2.53582e-08	2.01234e-08
GOTERM_CC_DIRECT	GO:0000139~Golgi membrane	140	3.16814	2.30923e-09	Q9QZE5, Q8R3I3, Q9JMH9, E9QAT4, Q6ZPR5, Q9JKD3, Q9ER00, Q9JLN9, A2A5R2, O08547, Q9CR64, Q3U2P1, O55013, P49817, Q01405, Q99KF1, P70704, Q80U04, P61022, Q9JLV5, Q9Z1S3, Q9CYL5, Q3U0D9, Q91W53, P98200, Q9EPL2, P48320, Q62418, Q61161, Q9ES97, Q3B7Z2, Q64310, Q6QD59, P59481, Q99MI1, P39054, Q9QXK3, Q80TN5, O55029, Q9JJY3, Q5XJY5, P49769, Q61411, Q9QYE6, Q922P8, Q9WV55, Q9Z1T6, Q9QYE9, Q9JIF7, P58158,…	4286	403	19662	1.59367	2.58402e-06	3.40003e-08	2.69815e-08
GOTERM_CC_DIRECT	GO:0031201~SNARE complex	31	0.701516	2.83821e-09	P70280, P46096, P60879, Q9D0I4, Q9JKD3, Q9ER00, Q91YJ2, Q9CQW1, Q8BVI5, O08547, Q62442, P84086, O09044, P61264, P63044, O70439, O35526, Q9ERB0, Q8K400, Q9CWZ7, Q8K1E0, O70480, P70452, Q64332, P63040, Q6QD59, Q8R570, Q5DQR4, Q9JKK1, O88983, O88384	4286	49	19662	2.90229	3.17595e-06	4.12462e-08	3.27316e-08
GOTERM_CC_DIRECT	GO:0031012~extracellular matrix	109	2.46662	2.94069e-09	P97461, P07901, P38647, P16858, P18242, P18760, P62082, Q07235, Q9R118, P20152, P56480, P63325, P62806, Q91YQ5, Q03265, P14206, P14602, Q9QXS1, Q80YX1, Q06890, P14211, O55142, P62245, P10493, O35474, Q8BMK4, Q61292, P48678, P62889, O88322, Q9JHU4, P60867, Q8BMS1, E9Q557, Q8VCC9, Q9DB20, P51881, P26883, Q61656, Q05793, Q04857, Q9DCT8, P16045, Q8VDD5, P21981, Q60605, P02468, P04104, P51410, P61979,…	4286	294	19662	1.70081	3.29062e-06	4.21876e-08	3.34786e-08
GOTERM_CC_DIRECT	GO:0097060~synaptic membrane	24	0.543109	5.21645e-09	O70589, Q62108, Q61503, P55772, Q9Z2D1, Q9Z2H5, P60191, P11881, Q00493, Q8CHC4, P23927, P23819, Q4KUS2, Q70FJ1, P09055, P42859, O55125, O88998, Q8BM13, P63318, P17183, P17182, Q9DC70, Q9JKY5	4286	33	19662	3.33636	5.83719e-06	7.38888e-08	5.86356e-08
GOTERM_CC_DIRECT	GO:0030863~cortical cytoskeleton	23	0.52048	6.63117e-09	Q60598, P70290, Q7TPR4, Q62108, P15508, Q62261, Q8BTM8, P16546, P04919, P48193, Q9WV69, P21107, Q8VDD5, P08032, P57780, Q02357, P47753, Q6IRU2, P47754, P47757, P49813, P60710, Q99NF2	4286	31	19662	3.40362	7.42025e-06	9.27535e-08	7.3606e-08
GOTERM_CC_DIRECT	GO:0005844~polysome	28	0.633628	8.02772e-09	P56959, Q8CES0, Q9WVR4, Q6PHQ8, Q8CJG1, Q812E0, Q8CJG0, P62852, P62754, P62908, A2AT37, P61759, Q9WUK2, P32233, O55091, P14148, Q9CPR4, P35922, Q61584, Q9JII5, Q8BGD9, P14211, P58252, E9PVA8, Q920Q6, P62702, Q9QUM9, O70305	4286	43	19662	2.98721	8.98298e-06	1.10901e-07	8.80076e-08
GOTERM_CC_DIRECT	GO:0005790~smooth endoplasmic reticulum	22	0.49785	8.23391e-09	P27773, P57759, O08807, P35564, P12023, Q80WT0, P14211, P20029, Q9JKR6, P24529, Q8K0T0, P24369, P08113, P08003, Q5SYD0, Q922R8, Q9ESN9, P20357, Q6P069, P49769, Q91YW3, E9Q401	4286	29	19662	3.48017	9.2137e-06	1.12363e-07	8.91672e-08
GOTERM_CC_DIRECT	GO:0031966~mitochondrial membrane	49	1.10885	8.71727e-09	Q9CR68, Q9ESW4, Q8BZ98, Q01768, Q8BGH4, P56480, Q60597, Q921G7, P19783, Q9JHI5, F6W8I0, Q06890, Q9CQ75, Q07417, P39054, Q07813, P39053, Q8BHE3, Q91V61, P20444, Q3UIU2, Q3UGX3, Q9ERS2, Q80U23, Q64442, Q9WV18, Q8CB44, Q3TZX3, O35465, Q9Z2B2, Q9D1H6, Q9JIZ9, Q9QUJ7, O88597, P45952, Q925N0, Q9DCT2, Q8R3B1, Q9QZD8, P10107, P51175, P51174, Q7TMS5, Q64373, Q9CQZ5, P59017, Q8VCF0, Q9DC69, Q8BUY5, Q9JIY5	4286	101	19662	2.22562	9.75458e-06	1.17526e-07	9.32643e-08
GOTERM_CC_DIRECT	GO:0005758~mitochondrial intermembrane space	40	0.905182	9.04038e-09	Q9D964, P27773, Q91YP2, Q3UUI3, P56213, Q8C1A5, Q9D8S4, Q9CQY6, Q9WTP7, Q9DCJ5, Q9CR61, Q99LY9, Q9WTP6, P58281, Q8R086, Q8K2C6, Q9CZN7, P36552, Q9QUH0, O35387, P62897, Q8K1R3, Q99JB2, Q9CQN1, P08228, Q9D1L0, Q8VCX5, P24270, Q9D0J4, Q99LX0, P97930, Q8WTY4, Q8BGD8, Q9CRA5, Q91VD9, Q9Z0X1, Q9WVA2, Q8VEA4, Q9JIY5, P56391	4286	75	19662	2.44666	1.01161e-05	1.20431e-07	9.55697e-08
GOTERM_CC_DIRECT	GO:0071013~catalytic step 2 spliceosome	47	1.06359	1.27997e-08	Q9Z315, Q61136, P59708, Q99NB9, Q61656, Q8BTI8, Q9CZU3, Q91YR7, P57784, O35691, Q8VEK3, Q6P4T2, Q922V4, Q99KP6, Q52KI8, Q3TKY6, Q6A068, P62317, Q8K4Z5, P62315, Q9CQL1, Q9CSN1, Q9Z204, P27048, Q8BHS3, P61979, Q9D554, P49312, Q91VM5, P29341, Q6PDM2, Q7TMK9, Q64012, O08810, Q6PE01, Q9CWZ3, Q91VC3, Q99PV0, P62320, Q9ERA6, O88569, Q9D0E1, O35737, Q9Z2X1, Q8BG05, Q921M3, Q9CQI7	4286	96	19662	2.24596	1.43228e-05	1.68504e-07	1.33719e-07
GOTERM_CC_DIRECT	GO:1904115~axon cytoplasm	23	0.52048	1.68336e-08	Q9JKC8, Q60575, P28741, P46061, Q91ZU6, P08228, Q9Z266, Q9JME5, Q9ERR1, Q3ULF4, Q9QYY8, Q9R0P9, O35668, P35282, O54774, P34022, Q9Z1T1, P08551, Q9DCR2, Q8BSZ2, P63005, Q5ND34, Q8R2R9	4286	32	19662	3.29726	1.88366e-05	2.19032e-07	1.73816e-07
GOTERM_CC_DIRECT	GO:0005793~endoplasmic reticulum-Golgi intermediate compartment	37	0.837294	1.80337e-08	Q9D1Q6, Q9JMH9, Q8K337, Q9D0I4, Q9D1G1, Q06180, Q9JIF7, Q9CX00, Q9DBH5, Q8K2L8, P97449, O08547, Q64444, Q9CQU3, Q6PDI5, Q99KF1, P61022, Q9DC16, Q02819, Q9D0F3, Q922R8, Q9D1D4, Q99JH8, Q8VE99, Q64310, P55937, Q80Y98, P11276, P19324, Q6P5E4, P59481, O54990, P61294, P20029, P63158, P09103, Q9EQC5	4286	68	19662	2.49614	2.01795e-05	2.29315e-07	1.81977e-07
GOTERM_CC_DIRECT	GO:0005884~actin filament	37	0.837294	1.80337e-08	O89053, Q6PEV3, Q7TPR4, Q64727, P26040, Q3V0K9, Q8BTM8, Q60780, Q99M87, Q61233, Q99JY9, Q04736, P63001, Q99104, Q8R307, P47757, P49813, P0C7L0, Q99K51, Q60598, Q6P9Q6, P68033, Q9WUM3, Q9ET54, P39688, Q9R0Q7, Q9EP53, Q9WV69, Q9JL04, Q9DAS9, Q9QXS6, Q05512, P05480, Q920Q4, O88342, P46735, Q91W86	4286	68	19662	2.49614	2.01795e-05	2.29315e-07	1.81977e-07
GOTERM_CC_DIRECT	GO:0032281~AMPA glutamate receptor complex	22	0.49785	2.1783e-08	Q8VHW2, Q62108, Q9Z2W8, Q80XG9, Q8CFV4, Q9Z2W9, P70175, Q9EP69, Q9JJJ7, Q99LR1, Q8R2Y0, Q8BGD5, P23818, P23819, O88602, Q8C3Q5, O88998, Q8BM13, Q9JJV5, P62956, Q3UH99, Q9CZN4	4286	30	19662	3.36416	2.43749e-05	2.73878e-07	2.17341e-07
GOTERM_CC_DIRECT	GO:0036464~cytoplasmic ribonucleoprotein granule	21	0.475221	2.75902e-08	P09405, P99024, O70133, P14869, P10637, P46660, P29341, Q9JKF1, Q8VEK3, P70336, P35922, Q62167, P63001, P68369, Q62095, P62702, O88485, P47911, P62754, P60766, P60710	4286	28	19662	3.44062	3.0873e-05	3.43038e-07	2.72223e-07
GOTERM_CC_DIRECT	GO:0008180~COP9 signalosome	23	0.52048	4.00678e-08	Q60631, Q8VBV7, O08917, Q03265, P11499, Q8R1A4, Q62077, P63168, O35864, P20029, Q8VDD5, O88544, Q9CZ04, O88545, P61202, O88543, Q9ESJ4, Q99LD4, P49813, O70318, Q99JB2, Q91XV3, Q99ME2	4286	33	19662	3.19734	4.48348e-05	4.92701e-07	3.90991e-07
GOTERM_CC_DIRECT	GO:0005852~eukaryotic translation initiation factor 3 complex	15	0.339443	4.08927e-08	Q99JX4, Q91WK2, Q3UGC7, Q9QZD9, Q9DCH4, O70194, Q9Z1D1, Q8R1B4, Q62167, Q8JZQ9, P61222, P23116, Q9DBZ5, Q8QZY1, P60229	4286	16	19662	4.30078	4.57579e-05	4.9738e-07	3.94704e-07
GOTERM_CC_DIRECT	GO:0016323~basolateral plasma membrane	79	1.78773	5.03062e-08	Q8BWG8, P07901, Q924N4, Q14B80, P27671, Q8R5M8, Q9Z0P4, Q62165, P04919, P17426, O88735, P23506, P07356, Q5SYD0, Q8K596, P97792, P35846, Q9Z1W9, Q60634, P56564, O08917, P70175, Q61161, P11499, P70452, Q8VDN2, Q9EQZ6, Q61165, P39447, P70414, Q9QZS3, Q9QXW9, Q01279, Q9JM63, P14094, Q02248, E9Q557, Q9Z0Z4, Q6XUX1, Q5DTL9, A2ALI5, P27573, Q67BT3, Q3TWN3, P26041, Q62108, P26040, Q8BTG7, P55088, O08966,…	4286	203	19662	1.78528	5.62911e-05	6.05297e-07	4.80343e-07
GOTERM_CC_DIRECT	GO:0014704~intercalated disc	30	0.678887	5.40926e-08	Q4VAE3, Q6PHZ2, Q64727, P48036, P04919, Q8C8R3, P68510, P09055, Q02257, P34152, G5E8K5, Q6PIE5, P47757, Q91ZU6, P26231, P97792, P23242, P97952, P14824, A2APX8, Q61165, Q8VDN2, P39447, P15116, P70414, P14094, Q02248, O88643, B1AWN6, E9Q557	4286	51	19662	2.69853	6.05278e-05	6.43932e-07	5.11003e-07
GOTERM_CC_DIRECT	GO:0005777~peroxisome	57	1.28988	5.83914e-08	Q8K1N1, P51660, Q9WUR2, Q921H8, Q9D328, Q9CZW4, Q99PU5, Q9R0H0, Q9JHR7, Q9DC50, P20152, Q9EPL9, P41216, P34914, P52760, Q920E5, Q8K1M6, Q99J39, Q61285, Q9R008, Q8BGC4, Q2TPA8, Q9R0A0, O09012, P32020, O88844, Q9DCM2, Q91V64, Q9Z210, Q922Q1, O09174, P54071, Q5XG73, P99029, Q6PCP5, Q9R0N7, Q99104, P40142, P58044, Q9QUJ7, P55096, Q99LB2, P47934, Q99JF5, P08228, P24270, Q8VCF0, Q91WC3, Q9D5T0, Q9QXY9,…	4286	131	19662	1.99609	6.53379e-05	6.8779e-07	5.45806e-07
GOTERM_CC_DIRECT	GO:0042645~mitochondrial nucleoid	28	0.633628	6.25002e-08	P51881, Q8BFR5, Q99JY0, Q9CQY6, P38647, Q80Y81, Q91VA6, Q9CZN7, P09671, P56480, Q8CGK3, Q925I1, Q6PB66, Q60930, Q8BKY8, Q60932, P53395, Q922E6, O08756, P50544, P40630, Q8C5Q4, Q99PU8, Q9JHS4, Q80YD1, Q3UFY8, Q8BMS1, Q922Q8	4286	46	19662	2.79239	6.99353e-05	7.21206e-07	5.72325e-07
GOTERM_CC_DIRECT	GO:0031902~late endosome membrane	43	0.973071	6.25174e-08	P70280, Q8BGT6, P97441, Q9Z1T6, Q9CQW2, Q9CQ22, Q6KAU4, P52875, Q8VEJ9, Q5KU39, Q8VEH3, Q9D8B3, Q9D2N9, P46467, Q8R307, P07356, Q9DB34, Q8CHS8, O70439, Q8C080, Q8R0J7, Q8R5L3, Q8K448, Q9CZX7, P51150, P51791, P59016, P14824, Q61187, Q68FE2, Q80X71, Q61542, Q9D1C8, P17047, Q91XD6, A2A8Z1, P0C0A3, P62746, Q920Q4, O88983, Q9CZ28, O88384, Q91W86	4286	88	19662	2.24162	6.99546e-05	7.21206e-07	5.72325e-07
GOTERM_CC_DIRECT	GO:0055037~recycling endosome	52	1.17674	7.5565e-08	A2A5R2, P09055, Q8C754, Q3TYD6, P61226, Q9CQD1, P61027, P22892, Q80YE4, Q5SSM3, Q8CI71, Q9JKK1, O35551, Q920Q4, P56371, P83887, Q80ZJ1, O88485, Q91ZR1, Q9R0N3, Q8R361, Q9D4F8, P62331, Q99104, Q9JM13, Q80TM9, Q8CDA1, P83510, Q8VDD8, O70439, Q8BGQ1, Q3UVL4, P62827, P59016, Q80U56, Q62351, Q68FE2, P46638, P23818, P68369, Q8CCB4, O88307, Q8VHK5, Q91V41, O08581, O88983, Q921I1, O70228, Q9QYK7, Q8BL66,…	4286	116	19662	2.05646	8.45537e-05	8.62829e-07	6.84711e-07
GOTERM_CC_DIRECT	GO:0030904~retromer complex	18	0.407332	1.40504e-07	Q9EQH3, Q9D8U8, P51150, Q3UHD6, O70492, Q8C0E2, O08788, Q8BWQ6, Q9QZ88, Q6P8X1, Q6PGL7, Q9CWK8, Q80XQ2, Q6PAL8, P24668, Q9WV80, P40336, Q810B6	4286	23	19662	3.59021	0.000157212	1.58812e-06	1.26028e-06
GOTERM_CC_DIRECT	GO:0005776~autophagosome	34	0.769405	1.60838e-07	Q8VD65, Q91VR7, Q99J83, O70172, Q8BFV2, P35283, Q8C0J2, O35668, Q6DFW0, Q80XQ2, Q80W47, Q9D2N9, O88597, Q8R307, Q8VDD8, Q80XI4, Q8BYH7, Q64337, Q6VNB8, P35288, Q68FE2, Q9CQV6, Q810J8, Q9QZM0, P42859, Q9JIW9, P60521, Q920Q4, P35290, Q8R317, Q8R3R8, P63017, Q91XU3, Q91W86	4286	64	19662	2.43711	0.000179961	1.79977e-06	1.42824e-06
GOTERM_CC_DIRECT	GO:0033290~eukaryotic 48S preinitiation complex	14	0.316814	1.64994e-07	Q99JX4, Q91WK2, Q3UGC7, Q9QZD9, Q9DCH4, O70194, Q9Z1D1, Q8R1B4, Q8JZQ9, P23116, Q9DBZ5, Q6ZWX6, Q8QZY1, P60229	4286	15	19662	4.28166	0.000184611	1.82224e-06	1.44607e-06
GOTERM_CC_DIRECT	GO:0048786~presynaptic active zone	21	0.475221	1.68247e-07	Q60613, P15209, Q80U57, Q68ED2, Q3TXX4, P60191, Q9EQZ7, Q62277, Q9QYS2, Q9QYX7, Q80Z38, O88935, Q99MI1, O88737, O35633, Q6PH08, Q4KUS2, Q9JIS5, Q99NE5, P48318, P60469	4286	30	19662	3.21125	0.00018825	1.82224e-06	1.44607e-06
GOTERM_CC_DIRECT	GO:0005778~peroxisomal membrane	30	0.678887	1.6936e-07	Q8K1N1, P51660, Q63932, Q5XG73, Q91Z38, Q9D328, Q9CZW4, Q9R0N7, Q9R0H0, Q8C437, P49817, Q9QUJ7, P55096, P41216, Q99LB2, P24270, Q61285, Q8VCF0, Q91WC3, Q9D5T0, Q9QXY9, Q8C0I1, P84078, Q9R0A0, O09012, Q8VCI5, Q9Z210, P47740, P24547, P98192	4286	53	19662	2.59669	0.000189495	1.82224e-06	1.44607e-06
GOTERM_CC_DIRECT	GO:0022627~cytosolic small ribosomal subunit	30	0.678887	1.6936e-07	P97461, P62082, P62281, Q62167, P63323, P25444, Q6ZWU9, P63325, P62852, P62754, P62908, P97351, Q9CZX8, P62849, P14206, P62270, Q9CQR2, Q9DB27, P62264, P62242, P63276, P14131, Q6ZWN5, P62245, P62267, P62702, P01942, P62301, P62983, P60867	4286	53	19662	2.59669	0.000189495	1.82224e-06	1.44607e-06
GOTERM_CC_DIRECT	GO:0015630~microtubule cytoskeleton	64	1.44829	2.00771e-07	Q9CQ48, Q922J3, Q9QXZ0, Q9CXS4, P10637, P70188, P16858, Q6PER3, Q5KU39, O55131, Q9CZN7, Q9ERD7, P63085, O88735, P61022, Q7TPH6, A2AG50, Q02819, P22892, P63005, Q8K0X8, P27546, Q8K0T4, Q8VH51, Q91WM1, Q8K1M6, Q7TNG5, P59114, Q99MN1, Q8R1Y2, P16546, Q61166, Q9QYY8, Q3TRR0, Q8BP00, Q3UMY5, Q8CIP4, P28741, Q91VR7, Q9WV55, Q9JKF1, A2AJI0, P31750, Q61771, Q80U63, Q8R5C5, P23927, Q04735, Q8K1X1, Q9JM96,…	4286	158	19662	1.85823	0.000224637	2.13964e-06	1.69795e-06
GOTERM_CC_DIRECT	GO:0005834~heterotrimeric G-protein complex	24	0.543109	2.73736e-07	P50153, Q61016, O54828, O54829, P29387, Q9JMF3, O70443, P63094, P18872, Q9Z2H2, P62880, Q9DAS9, P63213, Q9DC51, Q8CGK7, P27601, P62874, B2RSH2, Q9CXP8, P63216, P08752, P21279, P21278, P27600	4286	38	19662	2.89736	0.000306263	2.88972e-06	2.29318e-06
GOTERM_CC_DIRECT	GO:0031965~nuclear membrane	83	1.87825	4.09561e-07	Q61315, Q8R0G9, Q9ERU9, P12815, Q99P88, P16858, Q6P5F9, P97825, Q3TMP8, F6ZDS4, P97429, Q8BKC5, Q9CS84, Q8K2C9, Q922V4, Q9Z1B3, Q8R146, P63005, P46061, P21460, Q6PFD9, P46660, Q8BFY9, Q9QY81, Q9QZB9, P58742, Q6VNB8, Q6PHU5, Q8C8N2, Q8VI75, Q9QYY8, A2A8U2, Q8VE37, Q99LG2, Q01279, Q9CQC7, P62960, Q9DBS9, O88643, P48678, O09131, P49769, Q8R4R6, Q6P2B1, Q9WUT3, Q61655, Q8VE22, Q9WV55, Q8BJ71, Q8BH74,…	4286	226	19662	1.68479	0.000458194	4.28317e-06	3.39898e-06
GOTERM_CC_DIRECT	GO:0030123~AP-3 adaptor complex	12	0.271555	5.0096e-07	Q5KU39, Q8R5L3, O54774, Q9JME5, P59016, Q9Z1T1, Q9D2N9, Q920Q4, Q9DCR2, Q8BSZ2, Q8R307, Q91W86	4286	12	19662	4.58749	0.000560418	5.19051e-06	4.11901e-06
GOTERM_CC_DIRECT	GO:0005643~nuclear pore	33	0.746775	6.11015e-07	Q60960, Q8VD65, Q61655, Q9EPK7, Q9CR67, Q9D1M0, Q8R0G9, Q9ERU9, Q8BJ71, Q8BH74, Q99P88, P70168, Q8BFV2, F6ZDS4, Q8R2U0, Q8R480, O35344, O35345, O35343, P63242, Q8C570, Q9Z0W3, Q9CRT8, P46061, Q80U93, P62827, Q6PFD9, Q9QY81, P58742, Q99JX7, Q3U9G9, Q8BTS4, Q9WTI7	4286	64	19662	2.36543	0.000683493	6.27272e-06	4.97781e-06
GOTERM_CC_DIRECT	GO:0022625~cytosolic large ribosomal subunit	42	0.950441	6.29517e-07	P62918, P53026, Q9CXW4, P35979, Q6ZWV3, P99027, Q9D7S7, P62717, P19253, P14115, P12970, P67984, P63323, P62751, P35980, O09167, P62911, P47911, P47955, P62830, P51410, Q9CR57, P14869, Q9D1R9, Q9JJI8, P14148, Q9CPR4, O55142, P61255, P84099, Q9D8E6, P47962, P61358, Q6ZWV7, P62900, P47963, P62889, Q8BP67, P27659, P47964, P61514, Q9CZM2	4286	91	19662	2.11731	0.000704182	6.4039e-06	5.08192e-06
GOTERM_CC_DIRECT	GO:0030659~cytoplasmic vesicle membrane	51	1.15411	7.49249e-07	Q922J3, Q9D8U8, Q6P4T1, O55057, P63321, P47759, Q3UHL1, Q9JL56, P63044, Q6ZQ29, P61982, Q9DCR2, Q9JKC8, Q61644, Q7TPS5, Q9Z1G4, Q8BYR5, Q8BVL3, Q9R0M6, Q9JL04, O35633, Q80TN5, Q80TJ1, P24529, P42859, Q8BPQ7, P56371, Q8R2R9, Q9WVE8, Q9Z1T6, Q9CQW1, Q9D387, O55042, P35282, P63101, P68510, Q9DB50, Q8BSZ2, Q9QYB1, P62259, Q60575, Q9CQV8, P52189, P10107, P68254, Q8VBT9, Q8C129, Q52KF3, Q6DFV3, Q8R550,…	4286	120	19662	1.94969	0.000838059	7.55324e-06	5.99399e-06
GOTERM_CC_DIRECT	GO:0002102~podosome	21	0.475221	7.98185e-07	P29533, Q60598, Q60875, P61979, Q64727, Q62419, A2AAY5, Q62418, Q9ET54, Q9QWY8, Q61233, Q99JY9, Q61553, P13020, P61161, P21107, P05480, Q6IRU2, O88342, Q91Y86, P60710	4286	32	19662	3.01054	0.000892771	7.97473e-06	6.32847e-06
GOTERM_CC_DIRECT	GO:0012505~endomembrane system	49	1.10885	8.58977e-07	Q91V36, Q9D0I4, Q9JLB2, Q9ER00, Q9JLN9, Q8R5A6, Q99J45, Q9CR64, Q5SVR0, Q9CXF4, Q80UU9, A2AWA9, Q6ZPQ6, A6H6A9, Q8R3D1, O70161, Q9ES97, Q99KR6, Q9D394, Q6VNB8, Q8R570, O55022, Q8BPQ7, Q8BIK4, Q9WTR1, P52332, Q62261, P70441, Q9D662, Q3UHE1, Q9JI19, Q9JHL1, Q9JM96, Q8BHL3, P62814, O70439, P62908, Q8BM85, Q60613, Q8VCZ6, Q9EPN1, Q8VBT9, Q9CQV6, Q9WV69, P58802, Q8C129, P84078, Q99LM2, O88983	4286	114	19662	1.97182	0.000960734	8.50615e-06	6.75019e-06
GOTERM_CC_DIRECT	GO:0005903~brush border	37	0.837294	1.00554e-06	Q9JMH9, Q7TPR4, O08808, Q64727, P26040, Q3V0K9, Q61879, Q8BTM8, Q99JY9, Q8VDD5, Q8C0P5, Q8CFE6, Q60605, P47753, P47754, P47757, Q5SYD0, Q80X90, Q9QYB5, Q9Z0G0, P35846, Q8K1M6, O08638, P16406, Q64331, P97318, Q9QXS1, Q9EQZ6, Q3THE2, Q9JJ28, O54990, Q08509, P57780, Q9WTI7, Q6URW6, E9Q634, P46735	4286	77	19662	2.20438	0.00112457	9.87018e-06	7.83263e-06
GOTERM_CC_DIRECT	GO:0005623~cell	83	1.87825	1.14612e-06	Q9QZE5, Q5H8C4, O08709, Q9Z0P5, Q9D0M5, Q9Z0P4, Q9JMH6, Q9CQ85, O08749, Q9CQU5, Q9CR64, O08677, Q7TQF7, Q8C0L0, Q9QUH0, Q91W90, Q923X4, Q91X72, P22892, Q9DCR2, Q922R8, Q9JKC8, Q9D710, P47791, P28571, Q9ESZ8, Q80WT5, P17710, Q4JIM5, O55143, Q80TN4, Q61171, P09103, Q8CDN6, Q8R2R9, P27773, Q9D1Q6, Q922H2, O08807, P99029, Q3V3Q7, P29391, Q8BMA6, Q3TXX4, Q7TNF0, Q9CPQ3, Q8BZW8, Q8C0E2, Q9JLT4, Q02357,…	4286	231	19662	1.64832	0.00128168	1.11522e-05	8.85001e-06
GOTERM_CC_DIRECT	GO:0030315~T-tubule	30	0.678887	1.28647e-06	Q6PHZ2, P26041, P48453, P26040, P26043, P55088, Q68FD5, Q9Z0J4, O08532, Q8C8R3, G5E8K5, Q6PIE5, P97952, O08539, A2APX8, Q61165, Q8VDN2, O55074, P15116, P12367, P70414, Q8R3Z5, P63250, Q811D0, Q60738, B1AWN6, Q01815, Q6P069, Q6Q477, Q9Z0V2	4286	57	19662	2.41447	0.00143853	1.241e-05	9.84816e-06
GOTERM_CC_DIRECT	GO:0060077~inhibitory synapse	16	0.362073	1.61796e-06	E9PZ19, P97300, P51791, P48320, Q9R0N3, Q8BYM5, Q9QYX7, P63080, Q9CS84, O88737, P22723, O35633, Q69ZK9, Q8BUV3, P48318, Q3TES0	4286	21	19662	3.49523	0.00180886	1.54743e-05	1.22799e-05
GOTERM_CC_DIRECT	GO:0005634~nucleus	1438	32.5413	1.93886e-06	Q9D2U9, Q5RJI5, P06537, Q9CR67, Q8QZY9, Q9Z0P4, Q9CR62, O35495, Q62086, O70250, P18760, Q5SXA9, Q80Y81, Q9CQU5, Q8JZN5, Q6PDG5, Q9DAR7, Q62095, Q52KI8, P63328, Q60902, Q9Z2U1, P61148, P63325, Q9Z2U0, Q569Z5, Q569Z6, Q8BTZ4, P97351, P97352, Q8CC35, Q9EQN3, P98203, Q9CQT1, Q7M6Y3, P39447, P39688, Q99LG2, P62242, Q9JKS5, P42859, Q3TIX9, P63330, P04370, Q8K183, Q9Z130, Q9Z2V5, Q3UI43, Q99LG4, Q9DB20,…	4286	6019	19662	1.096	0.00216723	1.83863e-05	1.45907e-05
GOTERM_CC_DIRECT	GO:0016023~cytoplasmic, membrane-bounded vesicle	59	1.33514	2.50884e-06	Q8BWG8, O08709, Q9D328, Q9CWU6, Q9R0P3, Q99PU5, P70268, P97822, A2A5R2, P17427, P63001, Q6P8X1, P16388, Q6ZQ29, Q9ESN9, Q9QZB1, Q6PB44, Q60875, Q8K2K6, Q9Z2A0, Q6PHU5, Q8BYR5, Q8BVL3, Q9QZS3, Q4JIM5, Q8BXQ2, O88447, P42859, Q91YD9, Q9WTI7, Q9ESE1, Q9D0K0, Q9CX00, Q80TY0, Q9ET22, Q8BG94, O35668, P41234, Q6PDI5, O35387, O88597, Q8K012, Q8BGQ1, Q91ZU6, Q9Z0G0, Q9JMA1, Q9QYB8, Q64331, Q62351, Q9D2V7,…	4286	151	19662	1.79246	0.00280346	2.35915e-05	1.87214e-05
GOTERM_CC_DIRECT	GO:0016282~eukaryotic 43S preinitiation complex	13	0.294184	2.63763e-06	Q99JX4, Q91WK2, Q3UGC7, Q9QZD9, Q9DCH4, O70194, Q9Z1D1, Q8R1B4, Q8JZQ9, P23116, Q9DBZ5, Q8QZY1, P60229	4286	15	19662	3.97583	0.00294716	2.45959e-05	1.95185e-05
GOTERM_CC_DIRECT	GO:0042383~sarcolemma	49	1.10885	2.80152e-06	P29533, Q63810, P84309, A2ASQ1, P63094, Q62165, Q99L88, Q61234, P09055, Q6PIE5, P63328, P07356, P10605, Q60675, P51432, O08917, P70452, P18572, Q8VDN2, Q61165, Q9QXS1, P11531, P70414, P14094, Q9Z0V1, Q9Z0V2, Q64727, P48036, Q6PIC6, P55088, Q68FD5, Q64444, Q9Z0J4, Q04857, Q8C8R3, Q8CFE6, Q02357, P34152, G5E8K5, E9Q401, Q3URD3, Q91ZU6, P10107, Q9D2N4, P14824, P97813, Q03717, Q01815, Q6Q477	4286	118	19662	1.90498	0.00313	2.59083e-05	2.05599e-05
GOTERM_CC_DIRECT	GO:0015935~small ribosomal subunit	19	0.429962	3.3153e-06	P97461, P62908, P62849, Q9ER88, P14206, P62270, P68040, Q9CQR2, Q6ZWN5, P14131, P62267, Q61937, P62702, Q924T2, P25444, P60867, P62983, P62852, P62754	4286	29	19662	3.0056	0.00370295	3.04083e-05	2.4131e-05
GOTERM_CC_DIRECT	GO:0019013~viral nucleocapsid	16	0.362073	4.0553e-06	P61979, P49312, Q60668, O08848, P57784, Q62241, Q8VEK3, Q99020, Q9D883, Q62376, P62320, O88569, P62317, O35737, Q8BG05, P26369	4286	22	19662	3.33636	0.00452761	3.65958e-05	2.90412e-05
GOTERM_CC_DIRECT	GO:0032839~dendrite cytoplasm	16	0.362073	4.0553e-06	P08228, Q62108, Q3UTQ8, P35564, P11798, P23819, P84075, P63085, P39087, P47809, P63143, B1AS29, P31938, Q9JKY5, Q91Y86, Q8R3R8	4286	22	19662	3.33636	0.00452761	3.65958e-05	2.90412e-05
GOTERM_CC_DIRECT	GO:0005875~microtubule associated complex	18	0.407332	4.7159e-06	Q60575, Q61239, Q9ERU9, Q8K2I1, Q9D0M5, P10637, Q9ERR1, Q9CQV6, Q62048, P14873, P63168, Q9Z0Y1, Q9QYR6, Q9Z2V5, P63005, Q5ND34, P27546, P20357	4286	27	19662	3.05833	0.00526321	4.22168e-05	3.35018e-05
GOTERM_CC_DIRECT	GO:0016607~nuclear speck	73	1.65196	7.683e-06	P70182, Q9Z1N5, Q8BTI8, Q91YR7, Q923D5, O35691, Q9D883, Q62167, Q9D880, O35326, Q9R0L7, Q922V4, Q9Z1B3, P63087, Q9QXJ1, Q52KI8, P84104, Q810A7, Q9JIX8, P05132, Q569Z5, Q569Z6, Q9R0U0, Q8BK63, Q9D1J3, Q9JLI8, Q3TWW8, Q6PDM2, Q99KR6, Q8VHR5, Q8BGW1, Q62376, Q91VC3, Q99JX7, Q9R0I7, Q7TNC4, Q922U1, Q91YY4, Q9R1C7, Q9CWK3, Q921F2, Q61214, Q8R3G1, Q8K019, Q8CCS6, Q99K48, Q99MU3, Q7TQH0, P14576, Q61696,…	4286	205	19662	1.6336	0.00856046	6.82323e-05	5.41468e-05
GOTERM_CC_DIRECT	GO:0043679~axon terminus	38	0.859923	8.21725e-06	P26883, P48036, Q9R1T4, Q63959, P15209, Q68ED2, P51863, O55042, P15105, Q9R0N7, O35668, P16388, O55131, Q9QXT8, Q7TQF7, Q9CVB6, P63141, O55017, Q9CQD1, Q91ZZ3, Q9Z2Q6, Q9R0U0, Q61644, P61979, Q61923, P51791, P70296, O08539, Q0VGY8, P35922, Q60673, O88704, Q03137, P62482, P48318, Q6P069, P22005, P05201	4286	86	19662	2.02703	0.00915299	7.24023e-05	5.7456e-05
GOTERM_CC_DIRECT	GO:0044224~juxtaparanode region of axon	10	0.226296	8.85946e-06	P16388, Q62108, Q9WV92, P63141, Q9CPW0, P62482, P63143, Q91XM9, Q8VDQ8, Q61330	4286	10	19662	4.58749	0.0098648	7.68506e-05	6.0986e-05
GOTERM_CC_DIRECT	GO:0005838~proteasome regulatory particle	10	0.226296	8.85946e-06	Q9D8W5, Q99JI4, Q9CX56, P62196, Q8BG32, Q8VDM4, P62192, P26516, Q9WVJ2, P14685	4286	10	19662	4.58749	0.0098648	7.68506e-05	6.0986e-05
GOTERM_CC_DIRECT	GO:0044295~axonal growth cone	18	0.407332	9.56189e-06	Q9WTR1, Q60610, P60879, Q61315, P35802, P30416, Q61768, P11627, P10637, A2ASQ1, Q9ET54, P53668, Q9CS84, Q9QXS6, Q03137, O88998, Q99PI8, Q80YE4	4286	28	19662	2.9491	0.0106428	8.23058e-05	6.5315e-05
GOTERM_CC_DIRECT	GO:0031461~cullin-RING ubiquitin ligase complex	11	0.248925	1.01866e-05	Q9D4H8, Q9D5V5, Q3U1J4, Q9WTX6, Q9JLV5, P62878, A2A432, Q6ZQ38, Q80TT8, Q8BZM1, Q3TCH7	4286	12	19662	4.2052	0.0113342	8.70139e-05	6.90512e-05
GOTERM_CC_DIRECT	GO:0031252~cell leading edge	28	0.633628	1.08845e-05	O89053, Q7TT50, P18760, Q9JKF1, O08788, Q99JY9, Q8CBW3, Q3UU96, P63101, Q8VDD5, Q9CVB6, Q3UHJ0, Q8BRT1, Q5FWK3, O54988, P20152, P63005, Q8CCN5, Q62074, Q9ERR1, Q9WUM3, Q3V3V9, Q6EDY6, P84078, Q91YD9, Q9Z2V5, P83887, Q5SNZ0	4286	56	19662	2.29375	0.012106	9.22712e-05	7.32233e-05
GOTERM_CC_DIRECT	GO:0005815~microtubule organizing center	58	1.31251	1.42339e-05	Q9CQ48, P06537, Q8BUK6, P62082, O35250, P97427, A2A5R2, P58854, Q8K1A6, O88738, P63085, A2AWA9, P63005, Q99PL6, P97470, Q8VH51, Q7TPS5, P28652, O08917, Q61768, Q9Z2I8, Q921G8, P97318, Q9D8X2, Q58A65, O35874, P23116, P83887, Q8CIP4, Q9WU78, O08808, P11983, Q04736, Q8R361, P41234, Q9D4F8, Q00612, P34152, Q920P5, Q8BRT1, Q9CQF3, P26039, Q2KN98, Q3URD3, Q6Y685, Q9ERR1, Q80Y98, Q5SXY1, E9Q8I9, Q7TPM6,…	4286	155	19662	1.71661	0.0158017	0.000119758	9.50355e-05
GOTERM_CC_DIRECT	GO:0005813~centrosome	133	3.00973	1.62798e-05	Q5RJI5, Q922J3, Q8K1R7, Q9R0X5, Q61315, O70133, Q9WTX5, Q8BUK6, P51863, O08788, P68181, P63168, Q9Z0Y1, Q9DC51, Q8K0X8, Q8BK63, Q62417, Q3V3N7, Q80TV8, Q921G8, Q6PDQ2, Q61166, P31324, Q8K3E5, P15532, O35874, P39054, Q9DAI2, Q8BP00, Q9Z2V5, Q9JHU4, Q8CIP4, P49769, Q9CX00, Q8BH74, Q9Z0R6, Q8CBY8, P70441, A2AN08, Q61771, P57746, Q8R5C5, Q9DBR7, O35668, Q9D4F8, A2AGT5, Q9WUL7, P69566, O55234, P61164,…	4286	435	19662	1.40261	0.0180524	0.000135949	0.000107884
GOTERM_CC_DIRECT	GO:0005605~basal lamina	14	0.316814	1.73791e-05	Q60675, P55772, A2ASQ1, P11276, P19137, Q61001, Q05793, P97927, P10493, Q811D0, Q61292, O55026, P21836, P02468	4286	19	19662	3.38026	0.0192595	0.000140921	0.00011183
GOTERM_CC_DIRECT	GO:0016234~inclusion body	14	0.316814	1.73791e-05	Q8CI32, Q64337, P54775, P11499, Q6VNB8, Q9Z1E4, O55042, Q61696, O35668, P62196, P42859, Q91ZZ3, Q9Z2V5, P62334	4286	19	19662	3.38026	0.0192595	0.000140921	0.00011183
GOTERM_CC_DIRECT	GO:0030673~axolemma	14	0.316814	1.73791e-05	Q9WV92, Q60613, Q14B80, Q63959, Q62261, Q9WV18, P15388, Q9CPW0, Q02357, Q7TPD3, O89026, Q5SYD0, Q9ESN9, P43006	4286	19	19662	3.38026	0.0192595	0.000140921	0.00011183
GOTERM_CC_DIRECT	GO:0097440~apical dendrite	14	0.316814	1.73791e-05	Q5DTL9, P27671, Q7TN99, Q8BTM8, Q9CQW1, Q7TSK2, Q06890, Q5QNQ6, Q8CGE9, O88704, Q9CVB6, Q9QVP9, Q5SYD0, Q99NF2	4286	19	19662	3.38026	0.0192595	0.000140921	0.00011183
GOTERM_CC_DIRECT	GO:0055038~recycling endosome membrane	23	0.52048	2.17174e-05	Q8BGT6, Q9JKD3, Q8BH64, G3XA57, Q9EQP2, Q9ERN0, Q62351, Q9R0N5, Q9QXY6, Q9D387, Q62433, P35283, Q8R361, P46638, P62331, Q9WVK4, P61226, B9EHT4, P61027, Q8K021, Q80ZJ1, Q8VDD8, Q9WVE8	4286	43	19662	2.45378	0.0240091	0.000174833	0.000138741
GOTERM_CC_DIRECT	GO:0031594~neuromuscular junction	30	0.678887	2.33614e-05	Q6PHZ2, Q61879, Q63959, Q07235, Q6NZM9, Q62288, Q99M87, Q61772, Q9QYX7, Q61234, P63089, Q8VDD5, Q4KUS2, P09055, G5E8K5, P05132, P49615, Q3UUG6, Q9DBC7, Q9Z1M0, O08715, P12023, O55100, P23818, Q03137, Q811D0, P21836, Q9JIS5, P08553, P49769	4286	64	19662	2.15039	0.0258029	0.000186724	0.000148178
GOTERM_CC_DIRECT	GO:0009986~cell surface	181	4.09595	2.73545e-05	P29533, Q8BXA0, P09405, P55302, P98156, P07901, Q7M6Z0, P97467, O70370, Q8VCM7, P04919, Q07113, Q9CS84, Q01097, Q9CQU3, O35129, P13595, P63321, P49817, O88737, P17156, Q80TG9, Q8BXZ1, O35409, O89026, P07356, P56480, P01872, Q9D7N9, Q61327, Q9EPL2, Q8BLY3, O70480, P04925, Q61165, P39447, P12023, P56528, Q64314, Q06890, F7BWT7, P15388, P14211, Q3UQ44, P67778, O08688, O35874, Q03137, P50429, O35598,…	4286	629	19662	1.32009	0.0301464	0.00021709	0.000172275
GOTERM_CC_DIRECT	GO:0045335~phagocytic vesicle	22	0.49785	3.26057e-05	O89053, P70280, P97384, Q91Z67, Q6PF93, P51150, P51791, Q921E2, Q9ER00, Q9R0N3, P35288, Q9R0M6, Q9JL26, P46638, Q9JKK1, P14211, P35285, Q9CQD1, Q91V41, P62835, O88597, Q8BHH2	4286	41	19662	2.46158	0.0358287	0.000256942	0.0002039
GOTERM_CC_DIRECT	GO:0008540~proteasome regulatory particle, base subcomplex	11	0.248925	3.54482e-05	P54775, O35226, Q3TXS7, P46471, P62196, Q8VDM4, P62192, O88685, Q8BJY1, P62334, Q9CR00	4286	13	19662	3.88173	0.0388908	0.000273562	0.000217089
GOTERM_CC_DIRECT	GO:0030897~HOPS complex	11	0.248925	3.54482e-05	Q8BGQ1, Q5KU39, Q8R5L3, Q9D0I4, P59016, Q64362, Q8BUK6, Q9D2N9, Q920Q4, Q8R307, Q91W86	4286	13	19662	3.88173	0.0388908	0.000273562	0.000217089
GOTERM_CC_DIRECT	GO:0031253~cell projection membrane	11	0.248925	3.54482e-05	Q61315, Q8BTG7, O55026, Q02248, P55088, Q811D0, Q9QWY8, Q61166, Q9WV69, Q6PHN9, Q61553	4286	13	19662	3.88173	0.0388908	0.000273562	0.000217089
GOTERM_CC_DIRECT	GO:0005885~Arp2/3 protein complex	10	0.226296	3.92084e-05	Q9D898, P61161, Q9WV32, Q9CVB6, Q9JM76, Q9CPW4, Q9R0Q6, Q641P0, P59999, Q99JY9	4286	11	19662	4.17045	0.0429265	0.000300509	0.000238473
GOTERM_CC_DIRECT	GO:0005839~proteasome core complex	14	0.316814	3.9711e-05	O70435, P99026, P70195, Q9R1P0, Q9R1P1, Q9R1P4, Q9R1P3, Q60692, O55234, Q9Z2U1, Q9QUM9, P49722, O09061, Q9Z2U0	4286	20	19662	3.21125	0.0434646	0.00030229	0.000239887
GOTERM_CC_DIRECT	GO:0005764~lysosome	104	2.35347	4.43071e-05	Q61037, Q9D920, O08709, O70370, Q62086, P18242, Q9JLN9, Q07113, Q9JJR8, Q6DFW0, Q8BXR1, Q5KU39, Q8VEH3, P16460, Q8R307, Q04519, O89023, Q8R5L3, Q922Q9, Q9D7V9, Q91VK4, Q61207, P17439, Q64314, P17047, P50429, O35114, Q8C1Y8, O89017, P29416, P70280, Q9WV54, P27573, P97441, Q9R013, Q9ET22, Q9CQ22, O35668, P41234, Q99104, P09470, Q99M71, P23780, Q8K448, Q9Z266, P59016, P63082, Q80VP0, Q91XD6, Q8VHK5,…	4286	331	19662	1.44139	0.0483716	0.000334997	0.000265842
GOTERM_CC_DIRECT	GO:0005811~lipid particle	30	0.678887	4.73246e-05	Q61335, Q8BVA5, Q61316, Q9EQ06, Q9CZW4, P16858, P35278, Q9R1J0, Q3TFD2, Q9DCN2, P49817, Q6P4T0, Q99KP6, Q9QUJ7, Q8R127, P07356, Q80XK6, Q9CQN1, P51150, O08715, Q9QYY8, Q9DBG5, Q01853, Q99JI6, O35954, Q9WVK4, Q8BMK4, Q8R1X6, Q3TDN2, Q80UJ7	4286	66	19662	2.08522	0.0515796	0.000355411	0.000282042
GOTERM_CC_DIRECT	GO:0005763~mitochondrial small ribosomal subunit	17	0.384702	5.02618e-05	Q61733, Q8VE22, Q9DCA2, Q8BJZ4, Q80X85, Q9ER88, Q99N87, Q9CQX8, Q9CQV5, Q9CPX7, Q99N84, Q80ZK0, Q80ZS3, Q9DC71, Q924T2, Q9D7N3, Q9CQE3	4286	28	19662	2.78526	0.0546919	0.000374953	0.00029755
GOTERM_CC_DIRECT	GO:0008076~voltage-gated potassium channel complex	34	0.769405	5.11457e-05	Q80ZD8, Q08460, Q9Z218, P60879, Q62108, Q14B80, Q6ZPR4, Q63959, Q61330, Q6PHZ8, Q6NXK7, P16388, Q9QXT8, P63141, Q9CPW0, Q70FJ1, P63044, P63143, O35526, Q61423, Q60598, Q61923, Q91XM9, P15388, O54991, Q9JK45, Q9JJ69, P62482, Q9Z351, P0DP28, B1AWN6, Q9Z0V1, Q03717, Q9Z0V2	4286	79	19662	1.97436	0.0556265	0.00037902	0.000300777
GOTERM_CC_DIRECT	GO:0000159~protein phosphatase type 2A complex	13	0.294184	5.52012e-05	Q6P1F6, Q8BG02, Q60996, P58389, Q61151, Q6PD28, Q6PD03, P58404, Q925E7, Q76MZ3, P63330, O55106, Q9ERG2	4286	18	19662	3.31319	0.0599027	0.000403727	0.000320384
GOTERM_CC_DIRECT	GO:0005753~mitochondrial proton-transporting ATP synthase complex	13	0.294184	5.52012e-05	P97450, Q06185, P03930, Q78IK2, P56135, Q9CPQ8, Q9CQQ7, Q03265, Q9D3D9, Q9DCX2, P56480, Q91VR2, Q9DB20	4286	18	19662	3.31319	0.0599027	0.000403727	0.000320384
GOTERM_CC_DIRECT	GO:0033268~node of Ranvier	12	0.271555	7.5253e-05	Q810U3, Q9WTU3, Q811D0, G5E8K5, Q9Z351, P97952, O08539, A2APX8, Q62165, Q61330, B1AWN6, Q62288	4286	16	19662	3.44062	0.080763	0.000546806	0.000433927
GOTERM_CC_DIRECT	GO:0030139~endocytic vesicle	26	0.588368	7.88043e-05	Q9Z0R4, Q3UHC7, P35278, Q8BYM5, Q07113, Q9CS84, P62331, P63321, Q8CHG7, Q6PDI5, P61021, Q9CQD1, O70439, Q9Z0G0, Q60634, Q61768, Q64331, Q9QXY6, Q66T02, Q01279, Q9WVK4, Q00623, Q8R550, O35551, Q921I1, Q91W86	4286	55	19662	2.16863	0.084409	0.000568916	0.000451472
GOTERM_CC_DIRECT	GO:0030864~cortical actin cytoskeleton	22	0.49785	8.06429e-05	O89053, Q9JI91, Q7TPR4, Q60634, O08917, Q9D2P8, P26043, O35682, Q9R0P5, P18760, P10126, Q61792, P15116, P40124, A2ALU4, Q9JJK2, Q80Y17, P13020, Q6R891, P17809, Q9CYT6, Q6P9S0	4286	43	19662	2.34709	0.0862909	0.000578457	0.000459044
GOTERM_CC_DIRECT	GO:0097038~perinuclear endoplasmic reticulum	11	0.248925	9.96858e-05	Q61335, Q9R0N8, Q91ZU6, Q640M6, Q6NZC7, O35598, Q9DBS9, O08529, Q8BXR9, Q9Z0V1, Q9Z0V2	4286	14	19662	3.60446	0.105557	0.0007105	0.000563828
GOTERM_CC_DIRECT	GO:0030131~clathrin adaptor complex	13	0.294184	0.000120039	Q9JKC8, Q8R0H9, Q9JME5, Q9DBG3, P35585, P17427, P17426, P84091, Q8BMI3, O35643, Q9Z1T1, P22892, Q8R2R9	4286	19	19662	3.13881	0.1257	0.000844804	0.000670408
GOTERM_CC_DIRECT	GO:0000145~exocyst	13	0.294184	0.000120039	O35250, O35382, Q6KAR6, Q3TPX4, Q9JIW9, Q8R3S6, Q8R313, Q8R3T5, Q9D4H1, Q6PGF7, P42208, Q8VDD8, A6H5Z3	4286	19	19662	3.13881	0.1257	0.000844804	0.000670408
GOTERM_CC_DIRECT	GO:0044853~plasma membrane raft	10	0.226296	0.000126274	Q8BGY9, Q9DBC7, O08917, P26040, Q62165, P05132, Q5SYD0, P15116, P12367, Q9Z0V2	4286	12	19662	3.82291	0.131779	0.000883129	0.000700821
GOTERM_CC_DIRECT	GO:0016324~apical plasma membrane	101	2.28558	0.000134708	P07901, Q924N4, Q14B80, P51863, P17426, Q8CHG7, P51906, P60853, Q9Z127, Q3UTJ2, P35762, Q61165, P39447, Q9QXS1, Q8VDN2, Q64314, Q9JM63, Q6XUX1, Q8BRK8, P70441, P10852, P70689, P42567, Q99P58, Q9JHL1, P34152, O35387, P83510, P17809, P47857, Q8VBX6, P10107, Q01063, Q62074, Q9EPR4, P14824, P11276, P15116, Q91XE4, O08586, Q9R0K7, Q8VHK5, Q8BI08, O08581, Q3UHU5, Q9JKY5, Q80WJ7, G3X9J0, P97429, P16388,…	4286	328	19662	1.41261	0.139936	0.000936263	0.000742987
GOTERM_CC_DIRECT	GO:0005901~caveola	35	0.792034	0.000147055	Q61037, Q08460, O70572, P15208, Q9WTR5, Q9Z0J4, P49817, P63085, O08530, Q6PIE5, O54724, O35607, P17809, P97370, P10605, Q63844, Q9CPV9, Q60634, O08917, Q60714, Q8BH64, Q8VDN2, P32037, P97813, P17710, P14094, Q8VHK5, P05480, Q9Z2V5, Q924S8, Q9Z0V1, P21279, Q9WVE8, Q99MK8, Q9Z0V2	4286	86	19662	1.867	0.151738	0.00101193	0.00080303
GOTERM_CC_DIRECT	GO:0005750~mitochondrial respiratory chain complex III	9	0.203666	0.000148307	Q9D0M3, Q9CQ69, Q9CR68, P99028, Q9D855, Q9CZ13, Q9CXT8, Q8R1I1, Q9DB77	4286	10	19662	4.12874	0.152927	0.00101193	0.00080303
GOTERM_CC_DIRECT	GO:0031597~cytosolic proteasome complex	9	0.203666	0.000148307	P54775, Q9JHR7, P46471, P62196, O35593, Q9WUP7, P62192, O88685, P62334	4286	10	19662	4.12874	0.152927	0.00101193	0.00080303
GOTERM_CC_DIRECT	GO:0034098~VCP-NPL4-UFD1 AAA ATPase complex	8	0.181036	0.000150637	Q01853, P54731, P49817, Q922Y1, P60670, P70362, Q3TDN2, Q6P5G6	4286	8	19662	4.58749	0.155132	0.00101544	0.000805816
GOTERM_CC_DIRECT	GO:0071541~eukaryotic translation initiation factor 3 complex, eIF3m	8	0.181036	0.000150637	Q99JX4, Q91WK2, Q9QZD9, Q9DCH4, O70194, P23116, Q8R1B4, Q8JZQ9	4286	8	19662	4.58749	0.155132	0.00101544	0.000805816
GOTERM_CC_DIRECT	GO:0016529~sarcoplasmic reticulum	26	0.588368	0.000223519	Q6PHZ2, Q80W21, P11881, Q64444, P70302, Q9Z0J4, Q3TMP8, O08532, O35887, Q9WUB3, Q02357, O35387, G5E8K5, Q923T9, E9Q401, P28652, Q8BSY0, P56565, Q9Z2I2, O55074, P36536, Q8R3Z5, P14211, O55143, Q9D1X0, Q6P069	4286	58	19662	2.05646	0.221313	0.00149771	0.00118853
GOTERM_CC_DIRECT	GO:0033270~paranode region of axon	11	0.248925	0.000240416	Q810U3, P16388, O54991, Q9WV92, Q811D0, Q5EBJ4, G5E8K5, Q8VDQ8, P20917, B1AWN6, P16546	4286	15	19662	3.36416	0.235901	0.00158326	0.00125642
GOTERM_CC_DIRECT	GO:0005774~vacuolar membrane	11	0.248925	0.000240416	Q8VEJ9, Q9DB05, Q9CQF9, Q9CWZ7, P28663, Q9D9E0, Q9Z2D1, P63082, Q8C7K6, Q80WQ2, Q9R1Q9	4286	15	19662	3.36416	0.235901	0.00158326	0.00125642
GOTERM_CC_DIRECT	GO:0034399~nuclear periphery	13	0.294184	0.000240532	Q8BJ71, Q6PFD9, Q8BH74, P10637, Q8BIV3, Q8BFY9, P70168, Q8VI75, F6ZDS4, Q8BKC5, Q99LG2, Q99JF8, P20357	4286	20	19662	2.98187	0.236	0.00158326	0.00125642
GOTERM_CC_DIRECT	GO:0005819~spindle	43	0.973071	0.000267286	Q9WUT3, P97384, P06537, P23198, Q61879, Q9R1T4, Q80TQ2, Q68FD5, Q9JMD0, Q8VDQ8, P97427, A2AJI0, P31750, O08788, Q61771, Q9D187, O55131, Q8R480, Q8VDD5, Q9Z0Y1, P51807, Q99KP6, Q1HFZ0, Q6A065, P63005, Q8C052, P97492, Q2KN98, Q9CQR4, Q60875, Q9ERR1, P14602, Q61142, P18653, Q61166, O08579, Q4VC33, Q9QYY8, Q9JL04, Q9D071, Q9DC28, Q6ZWR6, Q8QZT2	4286	116	19662	1.70054	0.258539	0.00174908	0.00138801
GOTERM_CC_DIRECT	GO:0010494~cytoplasmic stress granule	19	0.429962	0.000274653	Q91VR5, P60824, Q3U0K8, Q60865, P29341, Q80U78, P97855, Q6A0A2, P63073, P35922, Q7TQH0, Q62167, P54823, P70318, Q8K2F8, P62960, Q3U0V1, Q6ZWX6, O70305	4286	37	19662	2.35574	0.264628	0.00178684	0.00141798
GOTERM_CC_DIRECT	GO:0043194~axon initial segment	10	0.226296	0.000330632	Q810U3, Q810U4, Q6PHZ2, Q9WTU3, G5E8K5, Q9Z351, Q80TE7, O08539, A2APX8, B1AWN6	4286	13	19662	3.52884	0.309292	0.00212631	0.00168736
GOTERM_CC_DIRECT	GO:0016514~SWI/SNF complex	10	0.226296	0.000330632	Q61466, Q6PDG5, Q6DIC0, E9Q4N7, Q3TKT4, A2BH40, O54941, Q99MR0, Q9Z0H3, Q9Z2N8	4286	13	19662	3.52884	0.309292	0.00212631	0.00168736
GOTERM_CC_DIRECT	GO:0032590~dendrite membrane	15	0.339443	0.000347691	Q91V14, Q63959, Q9Z0P4, P35438, Q9D387, P15388, P23818, O88704, P22723, P84075, O88703, D3YVF0, G5E829, Q03717, Q8R3R8	4286	26	19662	2.64663	0.322356	0.00222323	0.00176428
GOTERM_CC_DIRECT	GO:0016363~nuclear matrix	37	0.837294	0.00041312	Q99NB9, Q9Z1N5, Q9CW03, B2RQC6, O70551, Q99K48, P14733, P18760, Q9R0L7, O35129, Q8VIJ6, Q52KI8, Q61937, Q920N2, Q8K310, Q9QYB1, Q8R326, Q99NF2, Q9CRT8, Q9CSN1, O70589, Q9WTS4, E9Q7G0, Q62417, P45591, O88291, Q6DID3, G3X9K3, O35381, Q4VC33, Q8CGF7, P60122, P48678, Q9QUM9, Q9R1C7, Q9D0E1, P28867	4286	97	19662	1.74987	0.370215	0.0026266	0.00208438
GOTERM_CC_DIRECT	GO:0005730~nucleolus	225	5.09165	0.000430533	P62918, O70133, Q9JMH6, Q9DBD5, Q9R0H0, Q9Z2D8, Q9D4H8, P43274, Q6ZQ29, P61148, Q9D7N3, Q8QZY1, P63325, P97351, Q61206, Q9D1R9, Q9CQT1, Q04750, Q3B7Z2, P10126, Q9JMG1, P17563, P25976, Q8BK67, Q8BMZ5, Q6P3D0, Q61656, Q7TPV4, Q9CZU3, Q99K48, Q64362, O70591, Q922H9, O54781, P62137, Q9DBR1, Q8C570, O89086, O70589, Q61545, Q3UHD9, Q9Z266, P62827, Q9CZ30, Q8WTY4, Q9D6Z1, Q80TL0, P14148, Q923Z0, Q9CQA6,…	4286	842	19662	1.22587	0.382373	0.00271551	0.00215493
GOTERM_CC_DIRECT	GO:0042641~actomyosin	9	0.203666	0.000439238	Q3UU96, Q9JMH9, Q99104, Q8VDD5, Q7TT50, Q61879, Q6URW6, Q6NZM9, O35526	4286	11	19662	3.7534	0.388362	0.00271551	0.00215493
GOTERM_CC_DIRECT	GO:0008328~ionotropic glutamate receptor complex	9	0.203666	0.000439238	Q80Z38, P23818, P39087, Q62108, Q61625, Q811D0, Q91XM9, D3YZU1, Q9CZN4	4286	11	19662	3.7534	0.388362	0.00271551	0.00215493
GOTERM_CC_DIRECT	GO:0071782~endoplasmic reticulum tubular network	9	0.203666	0.000439238	P35293, Q8BH66, Q8BGH4, Q7TQ95, P61027, P70168, Q80UJ7, Q91YH5, Q60870	4286	11	19662	3.7534	0.388362	0.00271551	0.00215493
GOTERM_CC_DIRECT	GO:0016600~flotillin complex	9	0.203666	0.000439238	P26231, Q61327, Q62417, Q60634, P30999, O08917, Q02248, Q9WUM4, P22682	4286	11	19662	3.7534	0.388362	0.00271551	0.00215493
GOTERM_CC_DIRECT	GO:0072562~blood microparticle	47	1.06359	0.000463038	P29699, P54116, P07724, P26041, P20918, Q8VCM7, Q8VD04, P04919, Q61696, P63101, O08677, P17156, A6X935, O08992, P62196, Q91X72, E9PV24, P17809, P08226, Q9Z2W0, P01872, P60710, P29788, Q61147, P11859, P04104, Q8BJW6, P07759, Q9Z1Q5, P68033, P14106, Q62351, P11276, P06909, Q06890, Q8K0E8, P21614, P13020, Q00623, P01867, Q02105, P01942, P01029, P01027, Q921I1, P62962, P63017	4286	133	19662	1.62114	0.404444	0.00284692	0.00225922
GOTERM_CC_DIRECT	GO:0005832~chaperonin-containing T-complex	8	0.181036	0.000549244	P80315, P80314, P80313, P42932, P11983, P80318, P80317, P80316	4286	9	19662	4.07777	0.459236	0.00334024	0.0026507
GOTERM_CC_DIRECT	GO:0005869~dynactin complex	8	0.181036	0.000549244	Q9Z0Y1, P61164, Q9QZB7, Q8CBY8, Q9QZB9, O08788, Q99KJ8, Q8R5C5	4286	9	19662	4.07777	0.459236	0.00334024	0.0026507
GOTERM_CC_DIRECT	GO:0005952~cAMP-dependent protein kinase complex	7	0.158407	0.000608351	Q9DBC7, P12849, P05132, P31324, P68181, P12367, Q6PAM0	4286	7	19662	4.58749	0.493865	0.00365992	0.00290438
GOTERM_CC_DIRECT	GO:0033263~CORVET complex	7	0.158407	0.000608351	Q5KU39, Q3UR70, Q9D2N9, Q920Q4, Q8R307, Q0P5W1, Q91W86	4286	7	19662	4.58749	0.493865	0.00365992	0.00290438
GOTERM_CC_DIRECT	GO:0016581~NuRD complex	12	0.271555	0.000673813	Q9Z2D8, Q8K3G9, Q60972, Q60973, Q924K8, Q8K3H0, Q60737, P70288, Q8VHR5, Q6PDQ2, Q8K4B0, Q9R190	4286	19	19662	2.89736	0.529637	0.00403207	0.00319971
GOTERM_CC_DIRECT	GO:0032154~cleavage furrow	22	0.49785	0.000762103	Q9Z2Q6, Q9CQ26, P26043, Q61879, Q9R1T4, Q6PDN3, P70268, Q7TPM6, P62331, Q52KF3, P63321, O35954, P35282, O55131, Q9QUI0, P21107, Q8VDD5, Q9Z0Y1, P63087, P62746, P60487, P42208	4286	49	19662	2.05969	0.573916	0.00453614	0.00359972
GOTERM_CC_DIRECT	GO:0012506~vesicle membrane	16	0.362073	0.000945703	Q60631, Q9Z0G0, Q9Z1T6, P51791, Q8K3H0, P16406, Q64331, P97449, P97429, Q8VBT9, Q9Z0J4, Q99M51, Q8CHC4, P35282, O55143, O55033	4286	31	19662	2.36774	0.653108	0.00557852	0.00442692
GOTERM_CC_DIRECT	GO:0005886~plasma membrane	1142	25.843	0.000947202	Q9QXZ0, P49025, Q7M6Z0, Q8R5M8, Q9Z0P4, Q922J6, O35495, Q62086, O35250, P18760, Q71LX4, Q5SXA9, O70252, Q3TZZ7, P17427, Q3U7R1, P17426, Q69ZW3, Q9CQU3, P0CW02, P63321, Q80U04, Q9JL56, P63328, Q60902, Q8K0X8, Q3U1F9, Q9Z127, P98200, Q8CC35, P28571, P98203, Q9CR51, Q7M6Y3, P39447, P39688, Q9DB27, P62482, Q80TN5, P63330, P04370, Q6P9S0, Q8C460, Q9WVE8, Q9DB20, Q8BYA0, Q91X56, Q91V14, Q9Z0R4, Q80VQ0,…	4286	4874	19662	1.07487	0.65369	0.00557852	0.00442692
GOTERM_CC_DIRECT	GO:0005782~peroxisomal matrix	11	0.248925	0.00100797	Q9WUR2, Q9JHR7, P32020, P99029, Q99J39, P55096, P98192, P63038, Q9EPL9, P35700, Q99JF5	4286	17	19662	2.96838	0.676477	0.00590532	0.00468626
GOTERM_CC_DIRECT	GO:0030126~COPI vesicle coat	9	0.203666	0.00106516	Q9QZE5, Q8CIE6, P61924, Q9QXK3, Q9JIF7, Q9EQC5, O55029, O89079, Q5XJY5	4286	12	19662	3.44062	0.696555	0.00617575	0.00490086
GOTERM_CC_DIRECT	GO:0034663~endoplasmic reticulum chaperone complex	9	0.203666	0.00106516	Q9JKR6, Q9DC23, P20029, Q99KV1, P24369, P08003, P09103, P08113, Q922R8	4286	12	19662	3.44062	0.696555	0.00617575	0.00490086
GOTERM_CC_DIRECT	GO:0009898~cytoplasmic side of plasma membrane	21	0.475221	0.00112455	Q9D358, Q91ZU6, Q63932, A2ALK8, P26041, Q8VBT9, P48193, O08586, P35282, Q02257, P08032, Q00612, Q9D8B3, P24529, Q68FH0, Q811D0, Q60803, G5E829, Q9JIY5, Q924T7, P05532	4286	47	19662	2.04973	0.716086	0.00648647	0.00514744
GOTERM_CC_DIRECT	GO:0000776~kinetochore	42	0.950441	0.00120028	Q60520, Q9CQ48, Q61315, Q9D1M0, Q8R0G9, Q9CXS4, Q9R1T4, Q8BH74, Q9JMD0, Q8K2L8, Q6P5F9, O08788, Q9CQU5, F6ZDS4, Q9CU62, Q9DBR7, Q8R2U0, O55131, P63168, Q8R480, A2AGT5, Q9Z0Y1, Q8BRT1, P42208, Q5ND34, P63005, Q8R1Q8, Q99KJ8, Q9Z0W3, P46061, Q8BK63, O88271, Q6PFD9, P56387, Q9ERR1, Q9QZB9, Q80TV8, P70399, O54692, O88485, Q9WVA3, P49769	4286	120	19662	1.60562	0.739178	0.00688774	0.00546587
GOTERM_CC_DIRECT	GO:0005868~cytoplasmic dynein complex	13	0.294184	0.00133301	P56387, Q8CBY8, Q6PDL0, Q91YJ2, O08788, F6ZDS4, P63168, P51807, O88487, Q9JHU4, P62627, O88485, Q8R1Q8	4286	23	19662	2.59293	0.77522	0.0076104	0.00603935
GOTERM_CC_DIRECT	GO:0000421~autophagosome membrane	14	0.316814	0.00140571	Q91VR7, Q9D0I4, P51150, Q80VP0, Q8BFV2, Q68FE2, Q9CQV6, Q9DBG6, Q8C0J2, Q9JK48, P60521, Q9DBU0, Q8R3R8, Q9ERB0	4286	26	19662	2.47019	0.792806	0.00798474	0.00633641
GOTERM_CC_DIRECT	GO:0035253~ciliary rootlet	8	0.181036	0.00148476	P33175, Q61768, O88447, O88448, Q8CJ40, P28738, P12023, P49769	4286	10	19662	3.67	0.810371	0.00839117	0.00665894
GOTERM_CC_DIRECT	GO:0005912~adherens junction	23	0.52048	0.00173118	Q61301, Q8BYA0, P26231, Q3ZK22, A2ALI5, Q8R1F1, P97792, Q61315, Q64727, Q9JKF6, P39447, P15116, Q8K3E5, Q9QZQ1, Q5DTX6, Q6R891, Q6RHR9, P09055, Q02248, Q60629, O35927, Q80XP9, E9Q634	4286	55	19662	1.91841	0.856133	0.00973463	0.00772506
GOTERM_CC_DIRECT	GO:0015934~large ribosomal subunit	11	0.248925	0.00182642	P62918, O89086, P53026, Q9CPR5, P61255, Q9D8E6, P19253, Q61937, P14115, Q99N96, Q9CPR4	4286	18	19662	2.80347	0.870702	0.0102188	0.00810931
GOTERM_CC_DIRECT	GO:0032584~growth cone membrane	7	0.158407	0.00198149	Q9WTR1, P06837, Q9JKF6, P70211, O35382, O35250, Q9D387	4286	8	19662	4.01406	0.891335	0.0108691	0.00862532
GOTERM_CC_DIRECT	GO:0045254~pyruvate dehydrogenase complex	7	0.158407	0.00198149	Q8BKZ9, O08749, Q8BFP9, Q9JK42, P35486, Q9D051, Q8BMF4	4286	8	19662	4.01406	0.891335	0.0108691	0.00862532
GOTERM_CC_DIRECT	GO:0031595~nuclear proteasome complex	7	0.158407	0.00198149	Q9D8W5, P54775, P46471, P62196, P62192, O88685, P62334	4286	8	19662	4.01406	0.891335	0.0108691	0.00862532
GOTERM_CC_DIRECT	GO:0030132~clathrin coat of coated pit	7	0.158407	0.00198149	P42567, Q8CHC4, O08585, Q60902, Q68FD5, Q7M6Y3, Q6IRU5	4286	8	19662	4.01406	0.891335	0.0108691	0.00862532
GOTERM_CC_DIRECT	GO:0005891~voltage-gated calcium channel complex	13	0.294184	0.00214089	P49443, P54285, P97445, Q01063, Q9Z1L5, O08532, Q8R3Z5, Q61290, Q6PHS9, Q8R0S4, O55017, O88602, Q01815	4286	24	19662	2.48489	0.909121	0.0116861	0.0092737
GOTERM_CC_DIRECT	GO:0030137~COPI-coated vesicle	9	0.203666	0.00224042	Q61644, Q8VE99, P84078, Q9JIF7, P61164, O89079, Q5XJY5, Q9D1D4, Q8K212	4286	13	19662	3.17596	0.918719	0.0118816	0.00942886
GOTERM_CC_DIRECT	GO:0071564~npBAF complex	9	0.203666	0.00224042	Q61466, Q6PDG5, Q6DIC0, Q3TKT4, A2BH40, O54941, Q99MR0, Q9Z0H3, Q9Z2N8	4286	13	19662	3.17596	0.918719	0.0118816	0.00942886
GOTERM_CC_DIRECT	GO:0030665~clathrin-coated vesicle membrane	9	0.203666	0.00224042	O35643, Q9JME5, Q8VD75, Q62418, Q8K382, Q9Z1T1, P22892, P35585, Q9JKY5	4286	13	19662	3.17596	0.918719	0.0118816	0.00942886
GOTERM_CC_DIRECT	GO:0043229~intracellular organelle	9	0.203666	0.00224042	P46096, O88935, P60879, O35633, P63011, P63044, Q3TXX4, Q62277, O35526	4286	13	19662	3.17596	0.918719	0.0118816	0.00942886
GOTERM_CC_DIRECT	GO:0002199~zona pellucida receptor complex	9	0.203666	0.00224042	P80315, P80314, P80313, P42932, P17879, P11983, P80318, P80317, P80316	4286	13	19662	3.17596	0.918719	0.0118816	0.00942886
GOTERM_CC_DIRECT	GO:0005916~fascia adherens	9	0.203666	0.00224042	Q7TPR4, P23242, Q64727, Q02257, Q02248, Q71LX4, P16546, E9Q557, P15116	4286	13	19662	3.17596	0.918719	0.0118816	0.00942886
GOTERM_CC_DIRECT	GO:0061617~MICOS complex	6	0.135777	0.00241003	Q91VN4, Q8CAQ8, Q9CRB9, Q78IK4, Q9DCZ4, Q8R404	4286	6	19662	4.58749	0.932799	0.0126611	0.0100474
GOTERM_CC_DIRECT	GO:0035749~myelin sheath adaxonal region	6	0.135777	0.00241003	O08586, Q9JLB2, P16330, P70452, P20917, P07356	4286	6	19662	4.58749	0.932799	0.0126611	0.0100474
GOTERM_CC_DIRECT	GO:0071944~cell periphery	27	0.610998	0.0030721	P29533, P51880, Q62108, P26041, P26040, P26043, P06837, P70441, O35129, Q8VHH5, Q01768, Q9ERD7, Q9QWL7, Q60629, Q60676, Q8CCN5, P56564, Q9WUM3, P39688, Q64314, Q9QUI0, P10493, P16054, Q02248, P04370, P46735, P60766	4286	71	19662	1.74454	0.968031	0.0160639	0.0127478
GOTERM_CC_DIRECT	GO:0035371~microtubule plus-end	11	0.248925	0.00310709	Q91ZU6, A2AGT5, Q99104, Q922J3, Q61315, Q8R001, O35066, Q9Z0H8, Q61166, O08788, Q6PER3	4286	19	19662	2.65592	0.969262	0.0161713	0.012833
GOTERM_CC_DIRECT	GO:0031307~integral component of mitochondrial outer membrane	12	0.271555	0.0032698	Q9QYA2, Q8JZN7, Q8BG51, Q9CQ92, Q9DC29, Q9DCC8, P97742, O88741, Q9CPQ3, Q8BHS6, Q9D6K8, Q9D6K5	4286	22	19662	2.50227	0.974393	0.0169354	0.0134394
GOTERM_CC_DIRECT	GO:0005761~mitochondrial ribosome	13	0.294184	0.00330783	Q9Z1P6, Q9Z2Q5, Q8K2M0, Q9D338, Q9CQ40, Q9ER88, Q9CQV5, Q9D1P0, Q9CQA6, Q9DB15, Q9D1B9, Q921S7, Q9DC71	4286	25	19662	2.3855	0.975464	0.0169354	0.0134394
GOTERM_CC_DIRECT	GO:0045334~clathrin-coated endocytic vesicle	8	0.181036	0.00331444	Q8BGY9, P39054, Q8CDA1, Q64331, P59108, E9Q634, Q9Z140, Q6PHN9	4286	11	19662	3.33636	0.975645	0.0169354	0.0134394
GOTERM_CC_DIRECT	GO:0072546~ER membrane protein complex	8	0.181036	0.00331444	O70378, Q9EP72, Q99KI3, Q8C7X2, Q8K273, Q9CZX9, Q3TAS6, Q9CRD2	4286	11	19662	3.33636	0.975645	0.0169354	0.0134394
GOTERM_CC_DIRECT	GO:0031234~extrinsic component of cytoplasmic side of plasma membrane	26	0.588368	0.00343977	P52332, Q62108, Q9D8U8, Q80TQ2, Q9JKF1, Q3TZZ7, Q8CIB5, Q9QX11, Q04736, Q04735, P34152, Q9QVP9, P63143, F8VPU2, Q8BUV3, E9Q401, Q60610, Q9D2N4, P39688, Q9QUI0, Q4JIM5, O55143, P41242, P41241, P62482, P05480	4286	68	19662	1.75404	0.978842	0.0174959	0.0138842
GOTERM_CC_DIRECT	GO:0030141~secretory granule	38	0.859923	0.00388711	P70280, Q7TPR4, P46096, Q8BKX1, P97467, P80560, Q9QXV0, P17427, P17426, P84091, P35283, Q66L44, Q8R361, Q99104, Q99P58, Q9CZD3, P63044, Q9CZT8, P21661, O35526, Q8K400, P08228, Q9Z266, P51791, Q8VCT3, Q80XR2, Q00493, Q9D0V7, P12961, Q60673, Q5DQR4, P16014, P11087, Q03517, P47708, Q99LI8, P63038, P60766	4286	112	19662	1.55647	0.987198	0.0196818	0.0156188
GOTERM_CC_DIRECT	GO:0071565~nBAF complex	9	0.203666	0.00423253	Q61466, Q6PDG5, Q6DIC0, E9Q4N7, Q3TKT4, A2BH40, O54941, Q99MR0, Q9Z0H3	4286	14	19662	2.9491	0.991316	0.0211437	0.0167789
GOTERM_CC_DIRECT	GO:0031045~dense core granule	9	0.203666	0.00423253	Q5H8C4, P46096, P08228, Q03517, Q80TJ1, Q8BNY6, Q9R0N5, Q00493, Q9R0N7	4286	14	19662	2.9491	0.991316	0.0211437	0.0167789
GOTERM_CC_DIRECT	GO:0031143~pseudopodium	9	0.203666	0.00423253	P70280, Q8BWG8, Q63844, P26041, P63085, P16330, P57780, O08529, Q99N57	4286	14	19662	2.9491	0.991316	0.0211437	0.0167789
GOTERM_CC_DIRECT	GO:0032809~neuronal cell body membrane	14	0.316814	0.00473942	Q80ZD8, Q14B80, Q63959, Q3UHC7, Q8JZR6, P15388, Q9R0K7, P84075, P63141, Q8BLQ9, G5E829, Q03717, Q8K1S4, Q9Z0V2	4286	29	19662	2.21465	0.995088	0.0232732	0.0184688
GOTERM_CC_DIRECT	GO:0090544~BAF-type complex	10	0.226296	0.00476814	Q61466, Q6PDG5, Q6DIC0, E9Q4N7, Q3TKT4, A2BH40, O54941, Q99MR0, Q9Z0H3, Q9Z2N8	4286	17	19662	2.69853	0.995244	0.0232732	0.0184688
GOTERM_CC_DIRECT	GO:0002116~semaphorin receptor complex	7	0.158407	0.00484599	B2RXS4, Q9QZC2, Q3UH93, P70207, Q80UG2, Q8CJH3, P70206	4286	9	19662	3.56805	0.995642	0.0232732	0.0184688
GOTERM_CC_DIRECT	GO:0071203~WASH complex	7	0.158407	0.00484599	Q6PGL7, Q8C2E7, P47753, Q3UHD6, P47757, Q8VDD8, Q3UMB9	4286	9	19662	3.56805	0.995642	0.0232732	0.0184688
GOTERM_CC_DIRECT	GO:0008541~proteasome regulatory particle, lid subcomplex	7	0.158407	0.00484599	Q9D8W5, Q9CX56, Q8BG32, O35593, Q9JKV1, Q9WVJ2, P14685	4286	9	19662	3.56805	0.995642	0.0232732	0.0184688
GOTERM_CC_DIRECT	GO:0008290~F-actin capping protein complex	7	0.158407	0.00484599	Q9QYB8, P47753, P47754, P47757, P62774, Q9QYC0, Q3V3V9	4286	9	19662	3.56805	0.995642	0.0232732	0.0184688
GOTERM_CC_DIRECT	GO:0019773~proteasome core complex, alpha-subunit complex	7	0.158407	0.00484599	O70435, Q9R1P0, Q9Z2U1, Q9QUM9, P49722, Q9R1P4, Q9Z2U0	4286	9	19662	3.56805	0.995642	0.0232732	0.0184688
GOTERM_CC_DIRECT	GO:0005883~neurofilament	7	0.158407	0.00484599	Q80Z38, P97333, P63054, P46660, P08553, P08551, P19246	4286	9	19662	3.56805	0.995642	0.0232732	0.0184688
GOTERM_CC_DIRECT	GO:0030122~AP-2 adaptor complex	7	0.158407	0.00484599	P42567, Q80XQ2, Q61548, Q8VD75, Q7M6Y3, Q8VD37, P62743	4286	9	19662	3.56805	0.995642	0.0232732	0.0184688
GOTERM_CC_DIRECT	GO:0030667~secretory granule membrane	13	0.294184	0.00493821	P70280, P26041, P97411, P97467, P80560, Q0VGU4, Q6KAR6, P11881, Q64444, Q00493, Q99P58, P63044, Q9D1D4	4286	26	19662	2.29375	0.996072	0.0236148	0.0187399
GOTERM_CC_DIRECT	GO:0005686~U2 snRNP	11	0.248925	0.00501081	P62320, P27048, P59708, Q99NB9, Q8BGC0, P57784, P62317, Q923D4, Q8K4Z5, P62315, Q9CQI7	4286	20	19662	2.52312	0.99638	0.0236586	0.0187747
GOTERM_CC_DIRECT	GO:0000407~pre-autophagosomal structure	11	0.248925	0.00501081	Q810J8, Q64337, Q6P4T0, Q80W47, Q9D906, Q9ESK9, Q9ER00, O88597, Q91YI1, Q68FE2, Q80XK6	4286	20	19662	2.52312	0.99638	0.0236586	0.0187747
GOTERM_CC_DIRECT	GO:0044306~neuron projection terminus	11	0.248925	0.00501081	P17225, P46096, O88737, O35633, Q61315, Q62108, P63044, P48318, Q62277, P11531, Q9R0P9	4286	20	19662	2.52312	0.99638	0.0236586	0.0187747
GOTERM_CC_DIRECT	GO:0034709~methylosome	8	0.181036	0.00646341	P62320, P27048, Q8CIG8, Q99J09, P84089, P62317, P62315, Q9JIF0	4286	12	19662	3.05833	0.999294	0.0300106	0.0238154
GOTERM_CC_DIRECT	GO:0017146~NMDA selective glutamate receptor complex	8	0.181036	0.00646341	Q08509, Q9QVP9, Q6PFD5, P35438, D3YZU1, P35436, Q99K10, Q01097	4286	12	19662	3.05833	0.999294	0.0300106	0.0238154
GOTERM_CC_DIRECT	GO:0045263~proton-transporting ATP synthase complex, coupling factor F(o)	8	0.181036	0.00646341	P97450, Q06185, P03930, P56135, Q9CRA7, Q9CPQ8, Q9CQQ7, Q9DCX2	4286	12	19662	3.05833	0.999294	0.0300106	0.0238154
GOTERM_CC_DIRECT	GO:0000276~mitochondrial proton-transporting ATP synthase complex, coupling factor F(o)	8	0.181036	0.00646341	P97450, Q06185, P03930, P56135, Q9CPQ8, Q9CQQ7, Q9DCX2, Q9DB20	4286	12	19662	3.05833	0.999294	0.0300106	0.0238154
GOTERM_CC_DIRECT	GO:0005881~cytoplasmic microtubule	22	0.49785	0.00680995	Q9QZB1, Q922J3, Q8CCN5, Q61315, Q8R1F6, Q80TQ2, Q80TV8, Q80U23, Q3UHD3, Q9Z0H8, Q61166, P68369, Q8VCD6, Q9WUL7, P51807, Q8BRT1, Q9Z2V5, P83887, Q6VN19, P47758, Q8BM55, P05213	4286	57	19662	1.77061	0.999522	0.031489	0.0249886
GOTERM_CC_DIRECT	GO:0017101~aminoacyl-tRNA synthetase multienzyme complex	6	0.135777	0.00691421	Q8CGC7, Q8BML9, P31230, P47962, Q99MN1, Q9D0I9	4286	7	19662	3.93214	0.999575	0.0315796	0.0250605
GOTERM_CC_DIRECT	GO:0042382~paraspeckles	6	0.135777	0.00691421	Q8VIJ6, Q6NVF9, Q9CQF3, Q99K48, Q9D0E1, Q8R326	4286	7	19662	3.93214	0.999575	0.0315796	0.0250605
GOTERM_CC_DIRECT	GO:0030118~clathrin coat	6	0.135777	0.00691421	Q8CHC4, Q9JK45, O08585, Q68FD5, Q6IRU5, Q07113	4286	7	19662	3.93214	0.999575	0.0315796	0.0250605
GOTERM_CC_DIRECT	GO:0030658~transport vesicle membrane	13	0.294184	0.00714924	Q61235, P70280, P51791, P97467, O35681, Q64444, Q00493, Q8VEK0, Q60673, Q8R361, P47867, Q3UGY8, Q9D1D4	4286	27	19662	2.20879	0.999674	0.0325203	0.025807
GOTERM_CC_DIRECT	GO:0043220~Schmidt-Lanterman incisure	9	0.203666	0.00734946	O08586, Q8VBX6, Q9JLB2, Q62074, P45376, Q8VDQ8, Q9D8B7, P20917, P07356	4286	15	19662	2.7525	0.99974	0.0332957	0.0264223
GOTERM_CC_DIRECT	GO:0072686~mitotic spindle	19	0.429962	0.00749511	P46061, P62908, E9Q7G0, O08808, Q7TNG5, Q8VDQ8, Q99JN2, F6ZDS4, Q3TRR0, P63168, P63085, Q68FH0, Q8BRT1, Q3UMY5, Q8K341, P27546, Q8QZT2, Q921M4, P60766	4286	47	19662	1.85452	0.999779	0.0338187	0.0268373
GOTERM_CC_DIRECT	GO:0001772~immunological synapse	15	0.339443	0.00852635	O89053, Q9DBC7, Q9WU78, P26040, Q3UHD6, P35762, Q99PT1, Q64455, Q3V3V9, Q9D7X3, Q8VDD5, Q811D0, Q61490, O70439, Q99JB2	4286	34	19662	2.02389	0.999931	0.0383172	0.0304072
GOTERM_CC_DIRECT	GO:0005902~microvillus	27	0.610998	0.00858207	P29533, Q9JMD3, P26041, P26040, P26043, Q91WL8, P70441, P50516, Q61553, P50518, P00920, P62814, O35969, Q9QYB1, O35382, Q64331, Q91VE0, P58802, P46935, Q9JL04, O54990, Q3UQ44, P16330, Q9JM63, Q811D0, Q9WTI7, P48758	4286	76	19662	1.62977	0.999935	0.0384133	0.0304835
GOTERM_CC_DIRECT	GO:0070044~synaptobrevin 2-SNAP-25-syntaxin-1a complex	5	0.113148	0.00930361	Q9DB05, P28663, P60879, P63044, O35526	4286	5	19662	4.58749	0.999971	0.0409872	0.032526
GOTERM_CC_DIRECT	GO:0043227~membrane-bounded organelle	5	0.113148	0.00930361	Q61768, Q9WV60, O88447, Q8BH82, P49769	4286	5	19662	4.58749	0.999971	0.0409872	0.032526
GOTERM_CC_DIRECT	GO:0031105~septin complex	5	0.113148	0.00930361	Q9Z2Q6, O55131, Q9R1T4, P42208, Q80UG5	4286	5	19662	4.58749	0.999971	0.0409872	0.032526
GOTERM_CC_DIRECT	GO:0016281~eukaryotic translation initiation factor 4F complex	5	0.113148	0.00930361	Q62448, Q9WUK2, Q6NZJ6, P63073, Q8BGD9	4286	5	19662	4.58749	0.999971	0.0409872	0.032526
GOTERM_CC_DIRECT	GO:0031588~nucleotide-activated protein kinase complex	7	0.158407	0.00988782	Q9DBC7, O54950, Q8BRK8, Q5EG47, P12367, Q6PAM0, Q91WG5	4286	10	19662	3.21125	0.999985	0.04272	0.0339011
GOTERM_CC_DIRECT	GO:0044754~autolysosome	7	0.158407	0.00988782	P09528, Q64337, Q91VR7, P17047, Q6PF93, P29391, Q9CQV6	4286	10	19662	3.21125	0.999985	0.04272	0.0339011
GOTERM_CC_DIRECT	GO:0032591~dendritic spine membrane	7	0.158407	0.00988782	P23818, Q6R891, Q9Z0P4, D3YVF0, G5E829, Q80TS7, Q9CZN4	4286	10	19662	3.21125	0.999985	0.04272	0.0339011
GOTERM_CC_DIRECT	GO:0031080~nuclear pore outer ring	7	0.158407	0.00988782	Q8R2U0, Q8R480, Q9D1M0, Q8R0G9, Q6PFD9, Q8BH74, Q9Z0W3	4286	10	19662	3.21125	0.999985	0.04272	0.0339011
GOTERM_CC_DIRECT	GO:0031464~Cul4A-RING E3 ubiquitin ligase complex	7	0.158407	0.00988782	Q8C7D2, Q3U1J4, P62878, P46414, Q9Z1K5, Q8BZM1, Q3TCH7	4286	10	19662	3.21125	0.999985	0.04272	0.0339011
GOTERM_CC_DIRECT	GO:0031672~A band	12	0.271555	0.0107987	Q9DBR7, Q8C8R3, P56565, Q8BG95, Q9D8E6, Q02357, Q6NZM9, P47911, P14148, Q9CPR4, Q9CZM2, E9Q401	4286	25	19662	2.202	0.999995	0.0464758	0.0368816
GOTERM_CC_DIRECT	GO:0000932~cytoplasmic mRNA processing body	26	0.588368	0.0116713	Q91YT7, Q60865, P46471, Q9R1P0, P63073, Q8K2D3, Q9CR86, Q9DAR7, Q9EPU0, Q8CJG1, Q8K0V4, Q8CJG0, Q60809, Q6ZQ08, Q3UJB9, Q64337, Q8CI75, Q04750, Q80U78, P54823, Q8K2F8, O35710, Q9QUM9, P49722, O88685, Q9JKY0	4286	74	19662	1.61182	0.999998	0.0500391	0.0397094
GOTERM_CC_DIRECT	GO:0005685~U1 snRNP	10	0.226296	0.0118523	P62320, P27048, Q7TNC4, Q5SUF2, P62317, Q9R1C7, Q62241, Q62376, Q62189, P62315	4286	19	19662	2.41447	0.999998	0.05034	0.0399481
GOTERM_CC_DIRECT	GO:0032279~asymmetric synapse	9	0.203666	0.0119215	P23818, P23819, Q9QXS6, Q60613, D3YVF0, Q9Z2W9, Q68ED2, A2A5R2, P63017	4286	16	19662	2.58047	0.999999	0.05034	0.0399481
GOTERM_CC_DIRECT	GO:0071004~U2-type prespliceosome	9	0.203666	0.0119215	P27048, Q99NB9, Q7TNC4, Q5SUF2, Q9R1C7, Q62241, Q8K4Z5, Q62376, P26369	4286	16	19662	2.58047	0.999999	0.05034	0.0399481
GOTERM_CC_DIRECT	GO:0034045~pre-autophagosomal structure membrane	9	0.203666	0.0119215	Q8C0J2, Q91VM3, Q99J83, Q6P4T0, Q9D1G1, P51150, Q80W47, Q9ESK9, Q80XK6	4286	16	19662	2.58047	0.999999	0.05034	0.0399481
GOTERM_CC_DIRECT	GO:0031209~SCAR complex	6	0.135777	0.0151354	P62484, Q8BH43, Q7TMB8, P28660, Q8R5H6, Q8CBW3	4286	8	19662	3.44062	1	0.0634327	0.050338
GOTERM_CC_DIRECT	GO:0036477~somatodendritic compartment	6	0.135777	0.0151354	Q60610, O88704, P60879, O88703, Q9CQD1, P70452	4286	8	19662	3.44062	1	0.0634327	0.050338
GOTERM_CC_DIRECT	GO:0030134~ER to Golgi transport vesicle	11	0.248925	0.0163347	P59481, Q6PDI5, Q6NZC7, Q01405, Q9D0I4, Q9DBH5, Q9D0F3, Q80Y98, Q921M4, P12023, Q3UPL0	4286	23	19662	2.19402	1	0.0682036	0.054124
GOTERM_CC_DIRECT	GO:0015030~Cajal body	18	0.407332	0.0171456	Q9Z315, Q8BTI8, Q9CY66, Q9JLI8, Q5SU73, E9Q5C9, Q80WS3, Q62241, Q8K1C0, Q6P5F9, O08810, Q9ESX5, P35550, Q6DFW4, Q922U1, Q810A7, Q8CCF0, Q569Z5	4286	47	19662	1.75691	1	0.0710591	0.0563901
GOTERM_CC_DIRECT	GO:0030670~phagocytic vesicle membrane	18	0.407332	0.0171456	O89053, P70280, Q6NVF0, Q8K337, P51150, Q921E2, P14428, P35288, Q9R0N7, Q9R0M6, P46638, P17047, P39054, P35285, Q9CQD1, P61027, Q8BHH2, O35639	4286	47	19662	1.75691	1	0.0710591	0.0563901
GOTERM_CC_DIRECT	GO:0001891~phagocytic cup	10	0.226296	0.01745	O89053, P63001, Q4JIM5, P39054, Q9D8U8, P10107, O70161, Q9R0N3, P68040, Q61233	4286	20	19662	2.29375	1	0.0720535	0.0571792
GOTERM_CC_DIRECT	GO:0034705~potassium channel complex	7	0.158407	0.0177759	P16388, P63141, P62482, Q61923, P63143, O08581, Q9Z0V2	4286	11	19662	2.91931	1	0.0731295	0.0580331
GOTERM_CC_DIRECT	GO:0005791~rough endoplasmic reticulum	24	0.543109	0.017889	P55302, P27573, Q60931, P70296, Q91YQ5, P15209, P35564, Q68ED2, Q64444, Q9D8V0, O55042, P12023, P15105, Q9D024, Q9DBG6, P50429, P21836, Q02819, Q91V41, Q60629, E9PV24, P63038, P20357, P49769	4286	69	19662	1.59565	1	0.0733251	0.0581882
GOTERM_CC_DIRECT	GO:0044291~cell-cell contact zone	9	0.203666	0.01828	Q60610, Q60634, O08917, Q68FH0, Q9JKF6, Q7M750, P61226, Q9D8B7, Q9JLB9	4286	17	19662	2.42867	1	0.0743828	0.0590276
GOTERM_CC_DIRECT	GO:0005682~U5 snRNP	9	0.203666	0.01828	P62320, Q6P4T2, P27048, Q91YR7, P62317, Q6PE01, P62315, Q9CWK3, Q99PV0	4286	17	19662	2.42867	1	0.0743828	0.0590276
GOTERM_CC_DIRECT	GO:0005719~nuclear euchromatin	13	0.294184	0.0185714	P23198, Q62318, Q91VM5, Q9WTM5, P15864, P35700, Q02248, Q3TKT4, P43275, P43277, Q91X20, Q99NF2, P08775	4286	30	19662	1.98791	1	0.0752949	0.0597514
GOTERM_CC_DIRECT	GO:0031941~filamentous actin	15	0.339443	0.0194005	Q8BTM8, Q64331, P97427, Q5SXY1, Q62188, Q8CIB5, Q61553, Q6EDY6, Q3UQ44, A2ALU4, P21107, P58771, Q9WTI7, Q6IRU2, Q2KN98	4286	37	19662	1.85979	1	0.0783724	0.0621936
GOTERM_CC_DIRECT	GO:0005801~cis-Golgi network	16	0.362073	0.0218689	Q9QYE6, Q8BRF7, P26450, Q14BB9, P58158, Q8BUK6, Q9D289, Q6NZC7, Q70FJ1, Q02819, Q9EQC5, Q8CI04, Q923S9, Q921M4, Q9D1D4, Q99JH8	4286	41	19662	1.79024	1	0.0880263	0.0698547
GOTERM_CC_DIRECT	GO:0005604~basement membrane	31	0.701516	0.0227444	P07724, Q9CW03, A2ASQ1, Q62165, P19137, Q05793, P97927, P63089, P09055, Q61739, P02468, P08122, P07356, P29788, Q60675, O70589, P97298, O88271, P21460, Q61282, P14206, Q8BRJ3, P11276, Q61001, Q80YX1, Q8R2Z5, P10493, Q61292, O09131, O88322, Q921I1	4286	97	19662	1.46611	1	0.0903447	0.0716945
GOTERM_CC_DIRECT	GO:0070937~CRD-mediated mRNA stability complex	5	0.113148	0.0230908	P62960, O70133, Q91W50, Q8VEK3, Q7TMK9	4286	6	19662	3.82291	1	0.0903447	0.0716945
GOTERM_CC_DIRECT	GO:0070552~BRISC complex	5	0.113148	0.0230908	P46737, Q9CZN7, Q3TCJ1, Q8K3W0, Q3UI43	4286	6	19662	3.82291	1	0.0903447	0.0716945
GOTERM_CC_DIRECT	GO:0044354~macropinosome	5	0.113148	0.0230908	Q6EDY6, Q922J3, P07356, Q3V3V9, Q810B6	4286	6	19662	3.82291	1	0.0903447	0.0716945
GOTERM_CC_DIRECT	GO:0005851~eukaryotic translation initiation factor 2B complex	5	0.113148	0.0230908	Q8CHW4, Q99LD9, Q99LC8, Q61749, Q6ZWX6	4286	6	19662	3.82291	1	0.0903447	0.0716945
GOTERM_CC_DIRECT	GO:0014731~spectrin-associated cytoskeleton	5	0.113148	0.0230908	P08032, Q02357, P15508, G5E8K5, Q9WV69	4286	6	19662	3.82291	1	0.0903447	0.0716945
GOTERM_CC_DIRECT	GO:0042584~chromaffin granule membrane	5	0.113148	0.0230908	Q07076, P46096, P70704, P46097, Q6P069	4286	6	19662	3.82291	1	0.0903447	0.0716945
GOTERM_CC_DIRECT	GO:0051286~cell tip	5	0.113148	0.0230908	Q8C437, O35633, P26041, P26040, P26043	4286	6	19662	3.82291	1	0.0903447	0.0716945
GOTERM_CC_DIRECT	GO:0032588~trans-Golgi network membrane	10	0.226296	0.0247483	Q9JKK1, Q80Y17, Q9JKD3, Q921E2, B9EHT4, P63094, Q9ERN0, Q8K221, P46735, P52875	4286	21	19662	2.18452	1	0.0961576	0.0763074
GOTERM_CC_DIRECT	GO:0005796~Golgi lumen	10	0.226296	0.0247483	O35963, Q8CAL5, Q9R087, Q64519, A2ASQ1, Q9QZF2, Q05793, O35988, P29788, P51655	4286	21	19662	2.18452	1	0.0961576	0.0763074
GOTERM_CC_DIRECT	GO:0031225~anchored component of membrane	42	0.950441	0.0254641	P29533, Q8R4G0, Q63912, Q69Z26, Q7M6Z0, P97785, Q9WTR5, Q61330, Q64444, Q8BLC3, Q80V42, P0CW02, P13595, Q9QUR8, Q99PJ0, Q07409, Q80Z24, P01831, Q9QZF2, Q8BGN3, P60755, P35846, Q8CAL5, Q9R087, Q61503, Q3UZP4, Q8CFV4, P48320, Q8R4F1, P04925, Q61361, P0DP60, P12960, P51655, O08842, Q9WUC3, O88507, Q8BLK3, O35136, P09242, P21836, Q99PI8	4286	141	19662	1.36649	1	0.0985965	0.0782428
GOTERM_CC_DIRECT	GO:0009925~basal plasma membrane	16	0.362073	0.0273382	Q9CPV9, Q8BHW2, P55088, Q9EPR4, Q9QXS1, Q64314, P42567, P35293, P49817, P09470, Q811D0, Q9WTI7, G5E8K5, Q61739, O35607, Q921I1	4286	42	19662	1.74762	1	0.103396	0.0820512
GOTERM_CC_DIRECT	GO:0071011~precatalytic spliceosome	12	0.271555	0.0273486	P62320, P59708, Q9QX47, Q922V4, P62317, Q9D0T1, Q923D4, Q8CCF0, Q62376, Q6PE01, Q4FK66, P62315	4286	28	19662	1.96607	1	0.103396	0.0820512
GOTERM_CC_DIRECT	GO:0035748~myelin sheath abaxonal region	6	0.135777	0.0279972	Q80Y17, P16330, P09055, Q811D0, Q8VDQ8, O35382	4286	9	19662	3.05833	1	0.103396	0.0820512
GOTERM_CC_DIRECT	GO:0030532~small nuclear ribonucleoprotein complex	6	0.135777	0.0279972	Q99NB9, E9Q5C9, P62317, G3X9K3, Q99PV0, Q9CQI7	4286	9	19662	3.05833	1	0.103396	0.0820512
GOTERM_CC_DIRECT	GO:0044327~dendritic spine head	6	0.135777	0.0279972	Q91Z67, P84075, Q8BZ98, Q6R891, Q6PIC6, P56959	4286	9	19662	3.05833	1	0.103396	0.0820512
GOTERM_CC_DIRECT	GO:0042582~azurophil granule	6	0.135777	0.0279972	P97384, O09044, P20060, P29416, Q9Z0J4, O70439	4286	9	19662	3.05833	1	0.103396	0.0820512
GOTERM_CC_DIRECT	GO:0097449~astrocyte projection	6	0.135777	0.0279972	P03995, P26040, Q9JM63, P12023, Q9QYS2, Q3UVX5	4286	9	19662	3.05833	1	0.103396	0.0820512
GOTERM_CC_DIRECT	GO:0071439~clathrin complex	6	0.135777	0.0279972	Q5KU39, Q3UHJ0, O08585, Q68FD5, P59016, Q9D2N9	4286	9	19662	3.05833	1	0.103396	0.0820512
GOTERM_CC_DIRECT	GO:0005652~nuclear lamina	6	0.135777	0.0279972	O70589, Q3U9G9, Q920N2, P14733, O08579, Q8R4R6	4286	9	19662	3.05833	1	0.103396	0.0820512
GOTERM_CC_DIRECT	GO:0044233~ER-mitochondrion membrane contact site	6	0.135777	0.0279972	Q810J8, Q99J83, Q9D0I4, Q9DCC8, Q9QUJ7, P35564	4286	9	19662	3.05833	1	0.103396	0.0820512
GOTERM_CC_DIRECT	GO:0070688~MLL5-L complex	6	0.135777	0.0279972	Q61191, P62141, P63087, Q8CGY8, P62137, P60710	4286	9	19662	3.05833	1	0.103396	0.0820512
GOTERM_CC_DIRECT	GO:0030008~TRAPP complex	6	0.135777	0.0279972	O55013, Q5NCF2, Q9CQP2, Q9ES56, Q9D289, Q9CQA1	4286	9	19662	3.05833	1	0.103396	0.0820512
GOTERM_CC_DIRECT	GO:0016342~catenin complex	6	0.135777	0.0279972	P26231, Q61315, Q02257, Q02248, Q9JKF6, P15116	4286	9	19662	3.05833	1	0.103396	0.0820512
GOTERM_CC_DIRECT	GO:0035770~ribonucleoprotein granule	6	0.135777	0.0279972	Q8C5Q4, Q99PU8, Q922E6, Q61584, Q8R081, Q8BG05	4286	9	19662	3.05833	1	0.103396	0.0820512
GOTERM_CC_DIRECT	GO:0031091~platelet alpha granule	8	0.181036	0.0283466	P70280, O08599, P59016, Q07235, E9PV24, Q8VCM7, Q60770, Q8K0E8	4286	15	19662	2.44666	1	0.104342	0.0828021
GOTERM_CC_DIRECT	GO:0031314~extrinsic component of mitochondrial inner membrane	7	0.158407	0.0290884	Q8R1S0, P58281, Q3TUH1, A2APY7, Q9CQV1, Q9CXI0, Q8BMS4	4286	12	19662	2.67604	1	0.106721	0.0846901
GOTERM_CC_DIRECT	GO:0045177~apical part of cell	35	0.792034	0.0311211	P70280, P29533, P98156, P26041, P26040, P26043, P70441, G3X9J0, Q9QZX7, P21447, P00920, G5E829, Q9QYB1, Q9Z2Y3, E9Q7G0, P70296, Q62074, P70398, P70232, Q9QWW1, P16406, Q64331, P97318, P39447, Q3THE2, P12023, Q9Z1G3, Q9QZQ1, Q9QZS3, Q02248, O89017, P83887, P20444, P46735, P60766	4286	115	19662	1.39619	1	0.113806	0.0903122
GOTERM_CC_DIRECT	GO:0031430~M band	10	0.226296	0.0339713	O70433, P23927, Q3URD3, Q8C8R3, P56565, Q02357, Q62261, P05064, Q6PD03, P14602	4286	22	19662	2.08522	1	0.121442	0.0963723
GOTERM_CC_DIRECT	GO:0042719~mitochondrial intermembrane space protein transporter complex	4	0.0905182	0.0346202	Q9WV96, Q9WV98, P62073, P62075	4286	4	19662	4.58749	1	0.121442	0.0963723
GOTERM_CC_DIRECT	GO:0070032~synaptobrevin 2-SNAP-25-syntaxin-1a-complexin I complex	4	0.0905182	0.0346202	P60879, P63044, P63040, O35526	4286	4	19662	4.58749	1	0.121442	0.0963723
GOTERM_CC_DIRECT	GO:0030130~clathrin coat of trans-Golgi network vesicle	4	0.0905182	0.0346202	O08585, Q68FD5, Q6IRU5, Q5SV85	4286	4	19662	4.58749	1	0.121442	0.0963723
GOTERM_CC_DIRECT	GO:0005955~calcineurin complex	4	0.0905182	0.0346202	Q63810, P48453, P63328, P11881	4286	4	19662	4.58749	1	0.121442	0.0963723
GOTERM_CC_DIRECT	GO:0000322~storage vacuole	4	0.0905182	0.0346202	Q9ES28, P63044, P70452, P60766	4286	4	19662	4.58749	1	0.121442	0.0963723
GOTERM_CC_DIRECT	GO:0044304~main axon	4	0.0905182	0.0346202	Q60610, P10637, Q9QXJ1, P12023	4286	4	19662	4.58749	1	0.121442	0.0963723
GOTERM_CC_DIRECT	GO:1990745~EARP complex	4	0.0905182	0.0346202	Q3UVL4, Q8CCB4, Q8C754, Q8CI71	4286	4	19662	4.58749	1	0.121442	0.0963723
GOTERM_CC_DIRECT	GO:0070033~synaptobrevin 2-SNAP-25-syntaxin-1a-complexin II complex	4	0.0905182	0.0346202	P60879, P84086, P63044, O35526	4286	4	19662	4.58749	1	0.121442	0.0963723
GOTERM_CC_DIRECT	GO:0097418~neurofibrillary tangle	4	0.0905182	0.0346202	P08553, Q7M6Y3, P19246, Q06890	4286	4	19662	4.58749	1	0.121442	0.0963723
GOTERM_CC_DIRECT	GO:0002189~ribose phosphate diphosphokinase complex	4	0.0905182	0.0346202	Q9D0M1, Q8R574, Q9CS42, Q9D7G0	4286	4	19662	4.58749	1	0.121442	0.0963723
GOTERM_CC_DIRECT	GO:0045298~tubulin complex	4	0.0905182	0.0346202	P99024, P10637, P68372, P63028	4286	4	19662	4.58749	1	0.121442	0.0963723
GOTERM_CC_DIRECT	GO:0030125~clathrin vesicle coat	4	0.0905182	0.0346202	O08585, Q9D1J1, Q9CR95, Q6IRU5	4286	4	19662	4.58749	1	0.121442	0.0963723
GOTERM_CC_DIRECT	GO:0005740~mitochondrial envelope	9	0.203666	0.0375605	P19536, Q9JK48, O35465, P50171, Q9DC29, Q9Z2B2, Q9DCC8, Q9D3D9, Q64373	4286	19	19662	2.17302	1	0.131344	0.10423
GOTERM_CC_DIRECT	GO:0005637~nuclear inner membrane	15	0.339443	0.0384152	Q6PB66, Q61029, Q9WU40, Q80W54, P14733, P11881, O08579, A2A8U2, P21619, Q921T2, Q3U9G9, Q5XG69, Q8BJS4, P62996, Q9DBS1	4286	40	19662	1.72031	1	0.133915	0.10627
GOTERM_CC_DIRECT	GO:0033017~sarcoplasmic reticulum membrane	13	0.294184	0.0399972	P26883, P28652, Q8BSY0, Q6PHZ2, Q9Z2I2, Q8CGZ0, P70302, Q9Z0J4, Q3TMP8, O55143, Q923T9, Q6P069, E9Q401	4286	33	19662	1.80719	1	0.138997	0.110303
GOTERM_CC_DIRECT	GO:0030017~sarcomere	14	0.316814	0.0437681	Q9JI91, Q7TPR4, Q9R0Y5, P68033, Q8CBY8, Q6NZM9, P84078, Q9JKS5, Q9QUM9, Q9D0F3, P0DP28, Q6ZWR6, P49813, E9Q401	4286	37	19662	1.73581	1	0.150524	0.119451
GOTERM_CC_DIRECT	GO:0005762~mitochondrial large ribosomal subunit	14	0.316814	0.0437681	Q9CPR5, Q9JKF7, Q9CQN7, Q3TBW2, Q9D338, Q9CQ40, Q99N96, Q9D1P0, Q9DB15, Q8R035, Q9D1B9, Q9CQF0, Q9D1N9, Q9EQI8	4286	37	19662	1.73581	1	0.150524	0.119451
GOTERM_CC_DIRECT	GO:0000922~spindle pole	32	0.724146	0.0438422	Q9CQ48, P28740, Q9CW03, P70122, P58854, O08788, Q8VEJ9, Q9D4F8, A2AGT5, O88738, Q8BRT1, P46467, Q8R1Q8, Q9DCV4, P97492, Q8BG40, E9Q7G0, Q921G8, E9Q8I9, Q9ES74, P46737, O54692, Q3UJU9, Q3TCJ1, Q68FH0, Q02248, P63330, P0DP28, Q3UHU5, O88485, P83887, Q921M4	4286	106	19662	1.3849	1	0.150524	0.119451
GOTERM_CC_DIRECT	GO:0005641~nuclear envelope lumen	7	0.158407	0.0442582	Q9CXW3, P99024, O88307, Q07113, P12023, Q9JJA9, Q8CH18	4286	13	19662	2.47019	1	0.150524	0.119451
GOTERM_CC_DIRECT	GO:0031931~TORC1 complex	5	0.113148	0.0446595	Q6ZQ58, Q9DCJ1, Q9D1F4, Q9JLN9, Q8K4Q0	4286	7	19662	3.27678	1	0.150524	0.119451
GOTERM_CC_DIRECT	GO:0044309~neuron spine	5	0.113148	0.0446595	P23818, Q9QXS6, Q62108, Q4ACU6, Q9Z0P4	4286	7	19662	3.27678	1	0.150524	0.119451
GOTERM_CC_DIRECT	GO:0044300~cerebellar mossy fiber	5	0.113148	0.0446595	P0C192, Q62108, Q3UHC7, O08539, Q3TXX4	4286	7	19662	3.27678	1	0.150524	0.119451
GOTERM_CC_DIRECT	GO:0071437~invadopodium	5	0.113148	0.0446595	P61161, O88643, Q9D394, Q8VDD8, Q61553	4286	7	19662	3.27678	1	0.150524	0.119451
GOTERM_CC_DIRECT	GO:0001651~dense fibrillar component	5	0.113148	0.0446595	P09405, P35550, Q9CY66, Q04750, Q9D0T1	4286	7	19662	3.27678	1	0.150524	0.119451
GOTERM_CC_DIRECT	GO:0031428~box C/D snoRNP complex	5	0.113148	0.0446595	P35550, Q6DFW4, Q80WS3, Q9D0T1, Q9D6Z1	4286	7	19662	3.27678	1	0.150524	0.119451
GOTERM_CC_DIRECT	GO:0008250~oligosaccharyltransferase complex	6	0.135777	0.0461066	P46978, P61804, Q91YQ5, O54734, Q3TDQ1, Q9DBG6	4286	10	19662	2.7525	1	0.153096	0.121492
GOTERM_CC_DIRECT	GO:1990124~messenger ribonucleoprotein complex	6	0.135777	0.0461066	P62960, Q7TN99, Q812E0, P29341, P63017, Q8BG05	4286	10	19662	2.7525	1	0.153096	0.121492
GOTERM_CC_DIRECT	GO:0005687~U4 snRNP	6	0.135777	0.0461066	P62320, P27048, Q9Z1N5, P62317, Q8CCF0, P62315	4286	10	19662	2.7525	1	0.153096	0.121492
GOTERM_CC_DIRECT	GO:0097470~ribbon synapse	6	0.135777	0.0461066	P28741, P56546, O88737, O55143, Q69ZK9, Q9QYX7	4286	10	19662	2.7525	1	0.153096	0.121492
GOTERM_CC_DIRECT	GO:0005890~sodium:potassium-exchanging ATPase complex	6	0.135777	0.0461066	P14231, P14094, Q6PIC6, Q6PIE5, Q8VDN2, P97370	4286	10	19662	2.7525	1	0.153096	0.121492
GOTERM_CC_DIRECT	GO:0005795~Golgi stack	13	0.294184	0.0499326	Q921L5, Q9CZ44, P46460, P97411, Q9ES56, Q9Z1Z0, Q810J8, Q99P58, Q70FJ1, Q91V41, B9EHT4, Q8CDG3, Q91W53	4286	34	19662	1.75404	1	0.165309	0.131184
GOTERM_CC_DIRECT	GO:0005689~U12-type spliceosomal complex	11	0.248925	0.0517402	P62320, P27048, P59708, Q99NB9, P62960, Q8QZY9, O35286, P62317, Q923D4, Q921M3, P62315	4286	27	19662	1.86898	1	0.170788	0.135532
GOTERM_CC_DIRECT	GO:0000777~condensed chromosome kinetochore	26	0.588368	0.0541514	Q9CQ48, Q8R0G9, Q9CXS4, Q9R1T4, Q8BH74, Q9JMD0, Q9CQU5, Q8R2U0, O55131, Q8R480, Q9Z0Y1, P63087, Q8BRT1, P42208, Q8R1Q8, P46061, Q8BK63, O88271, P56387, Q9ERR1, Q9QZB9, Q80TV8, P70399, O54692, O88485, Q9WVA3	4286	84	19662	1.41994	1	0.178222	0.141431
GOTERM_CC_DIRECT	GO:0030286~dynein complex	12	0.271555	0.0570498	P63168, P56387, Q9D0M5, Q9Z2V5, O88487, Q9JHU4, Q6PDL0, P62627, O88485, O08788, Q99KJ8, Q8R1Q8	4286	31	19662	1.7758	1	0.18721	0.148564
GOTERM_CC_DIRECT	GO:0019897~extrinsic component of plasma membrane	13	0.294184	0.0614223	P08207, P20918, P35922, Q99M87, Q80U87, Q9QZS3, P63001, Q3UHJ0, P17182, Q8BUV3, P07356, Q8BL66, Q99JB2	4286	35	19662	1.70393	1	0.200969	0.159482
GOTERM_CC_DIRECT	GO:0016328~lateral plasma membrane	18	0.407332	0.0634373	Q8BYA0, Q61315, P23242, Q9D0J4, P10107, Q9WUM4, Q9JKF1, O55074, P16546, Q02257, Q05512, Q80Y24, Q02248, Q811D0, Q9WTI7, G5E8K5, Q3UHU5, Q03717	4286	54	19662	1.52916	1	0.206693	0.164024
GOTERM_CC_DIRECT	GO:0000974~Prp19 complex	7	0.158407	0.0635409	Q8BHS3, Q922V4, Q99KP6, Q6A068, P63017, P08775, P26369	4286	14	19662	2.29375	1	0.206693	0.164024
GOTERM_CC_DIRECT	GO:0035145~exon-exon junction complex	9	0.203666	0.0671025	Q9CQL1, Q9EPU0, A2AT37, Q6PDM2, O35691, Q8CHP5, Q91VC3, Q9CWZ3, Q569Z6	4286	21	19662	1.96607	1	0.217646	0.172716
GOTERM_CC_DIRECT	GO:0000151~ubiquitin ligase complex	27	0.610998	0.0692949	Q9CZY3, Q9ES00, Q9QZ73, Q61696, P61089, Q9WUD1, P62878, Q9JI90, Q8BZJ7, Q6ZPS6, O70481, Q5U430, Q8VDH1, Q3U7U3, Q9Z1K5, Q6WKZ8, Q9QY42, Q9Z1K6, P46737, P46935, P63037, Q8C863, Q6ZQ38, E9Q735, Q8R516, Q9QYK7, P63017	4286	90	19662	1.37625	1	0.224107	0.177843
GOTERM_CC_DIRECT	GO:0001931~uropod	6	0.135777	0.0697155	Q8VDD5, P26041, Q60634, O08917, P26040, O70161	4286	11	19662	2.50227	1	0.224817	0.178407
GOTERM_CC_DIRECT	GO:0097386~glial cell projection	4	0.0905182	0.0725952	P03995, Q8VDQ8, P35922, P15105	4286	5	19662	3.67	1	0.226807	0.179987
GOTERM_CC_DIRECT	GO:0005827~polar microtubule	4	0.0905182	0.0725952	Q9JLV5, Q99JN2, P83887, P58854	4286	5	19662	3.67	1	0.226807	0.179987
GOTERM_CC_DIRECT	GO:0031313~extrinsic component of endosome membrane	4	0.0905182	0.0725952	Q8C080, Q9D8U8, P10107, Q80U87	4286	5	19662	3.67	1	0.226807	0.179987
GOTERM_CC_DIRECT	GO:0032437~cuticular plate	4	0.0905182	0.0725952	P08032, Q62261, E9Q634, P16546	4286	5	19662	3.67	1	0.226807	0.179987
GOTERM_CC_DIRECT	GO:0045261~proton-transporting ATP synthase complex, catalytic core F(1)	4	0.0905182	0.0725952	Q9D3D9, Q03265, P56480, Q91VR2	4286	5	19662	3.67	1	0.226807	0.179987
GOTERM_CC_DIRECT	GO:0097452~GAIT complex	4	0.0905182	0.0725952	Q8CGC7, P19253, P16858, Q7TMK9	4286	5	19662	3.67	1	0.226807	0.179987
GOTERM_CC_DIRECT	GO:0005638~lamin filament	4	0.0905182	0.0725952	P21619, O55135, P48678, P14733	4286	5	19662	3.67	1	0.226807	0.179987
GOTERM_CC_DIRECT	GO:0044615~nuclear pore nuclear basket	4	0.0905182	0.0725952	Q9ERU9, Q6PFD9, F6ZDS4, Q8R4R6	4286	5	19662	3.67	1	0.226807	0.179987
GOTERM_CC_DIRECT	GO:0033010~paranodal junction	4	0.0905182	0.0725952	Q810U3, P45376, Q8VDQ8, Q9D8B7	4286	5	19662	3.67	1	0.226807	0.179987
GOTERM_CC_DIRECT	GO:0097422~tubular endosome	4	0.0905182	0.0725952	Q6P8X1, Q9EQH3, Q9D8U8, P40336	4286	5	19662	3.67	1	0.226807	0.179987
GOTERM_CC_DIRECT	GO:0000275~mitochondrial proton-transporting ATP synthase complex, catalytic core F(1)	4	0.0905182	0.0725952	Q9D3D9, Q03265, P56480, Q91VR2	4286	5	19662	3.67	1	0.226807	0.179987
GOTERM_CC_DIRECT	GO:0033180~proton-transporting V-type ATPase, V1 domain	5	0.113148	0.0741837	Q9D1K2, P50516, P62814, Q9R1Q9, Q9Z1G3	4286	8	19662	2.86718	1	0.226807	0.179987
GOTERM_CC_DIRECT	GO:0031232~extrinsic component of external side of plasma membrane	5	0.113148	0.0741837	P10107, P20918, Q07235, P08226, Q921I1	4286	8	19662	2.86718	1	0.226807	0.179987
GOTERM_CC_DIRECT	GO:0016460~myosin II complex	5	0.113148	0.0741837	Q8VDD5, Q9CQ19, Q61879, Q6URW6, Q3THE2	4286	8	19662	2.86718	1	0.226807	0.179987
GOTERM_CC_DIRECT	GO:0030285~integral component of synaptic vesicle membrane	5	0.113148	0.0741837	Q9WTT4, Q8C996, Q8BGN8, Q62277, Q8BG39	4286	8	19662	2.86718	1	0.226807	0.179987
GOTERM_CC_DIRECT	GO:0072669~tRNA-splicing ligase complex	5	0.113148	0.0741837	Q9CQE8, Q91VR5, Q3TJZ6, Q80VD1, Q99LF4	4286	8	19662	2.86718	1	0.226807	0.179987
GOTERM_CC_DIRECT	GO:0072357~PTW/PP1 phosphatase complex	5	0.113148	0.0741837	Q9DBR7, Q8BFQ4, P62141, P63087, P62137	4286	8	19662	2.86718	1	0.226807	0.179987
GOTERM_CC_DIRECT	GO:0043083~synaptic cleft	5	0.113148	0.0741837	Q8BZ98, Q80ZF8, Q9Z2W9, P35438, Q01097	4286	8	19662	2.86718	1	0.226807	0.179987
GOTERM_CC_DIRECT	GO:0000243~commitment complex	5	0.113148	0.0741837	P62320, Q62241, Q62376, P62315, P26369	4286	8	19662	2.86718	1	0.226807	0.179987
GOTERM_CC_DIRECT	GO:0031527~filopodium membrane	8	0.181036	0.0764407	P62331, P43406, Q9D3A9, P26041, P06837, Q9Z0P4, D3YVF0, P11531	4286	18	19662	2.03889	1	0.233071	0.184957
GOTERM_CC_DIRECT	GO:0033116~endoplasmic reticulum-Golgi intermediate compartment membrane	14	0.316814	0.0778225	P53994, Q61335, Q9D0I4, Q8K1E0, Q64310, O08547, Q9D387, Q8VBT9, Q9D662, Q99KF1, Q9DC16, Q9D0F3, Q9D1D4, Q99JH8	4286	40	19662	1.60562	1	0.23664	0.187789
GOTERM_CC_DIRECT	GO:0016459~myosin complex	17	0.384702	0.0841309	Q9JMH9, Q8C170, Q9CQ19, Q61879, Q9D0M5, O08638, Q64331, Q3THE2, Q99104, Q8VDD5, Q02566, Q9WTI7, Q60605, Q6URW6, Q5SYD0, E9Q634, P46735	4286	52	19662	1.49976	1	0.255129	0.202461
GOTERM_CC_DIRECT	GO:0034704~calcium channel complex	9	0.203666	0.0860346	Q3UMR5, Q6PHZ2, Q8VCX5, Q80UK0, Q01063, P58389, P0DP28, Q9Z2I2, E9Q401	4286	22	19662	1.8767	1	0.259619	0.206025
GOTERM_CC_DIRECT	GO:0031083~BLOC-1 complex	7	0.158407	0.0870037	Q8R570, Q2TBE6, P60879, Q9Z266, Q9ER00, Q8VDD8, Q3UMB9	4286	15	19662	2.14083	1	0.259619	0.206025
GOTERM_CC_DIRECT	GO:0005751~mitochondrial respiratory chain complex IV	7	0.158407	0.0870037	P19536, Q62425, P00405, P12787, P19783, P43024, P00397	4286	15	19662	2.14083	1	0.259619	0.206025
GOTERM_CC_DIRECT	GO:0032433~filopodium tip	7	0.158407	0.0870037	Q99104, Q9D3A9, Q9DBS9, P61087, P35922, P17426, Q99K10	4286	15	19662	2.14083	1	0.259619	0.206025
GOTERM_CC_DIRECT	GO:0046930~pore complex	7	0.158407	0.0870037	Q9QYA2, Q60930, Q07813, Q60931, Q60932, P55088, Q9CZR3	4286	15	19662	2.14083	1	0.259619	0.206025
GOTERM_CC_DIRECT	GO:0005662~DNA replication factor A complex	7	0.158407	0.0870037	Q8VEE4, P42669, Q922V4, Q99KP6, Q6A068, O35295, Q8BJL0	4286	15	19662	2.14083	1	0.259619	0.206025
GOTERM_CC_DIRECT	GO:0098794~postsynapse	10	0.226296	0.093223	Q80ZF8, Q9Z2D6, P63328, Q8BUV3, Q8BYM5, Q3TXX4, P35922, Q80UJ7, O55042, Q9Z2Y3	4286	26	19662	1.76442	1	0.277438	0.220165
GOTERM_CC_DIRECT	GO:0031462~Cul2-RING ubiquitin ligase complex	6	0.135777	0.0987349	Q9D4H8, P62878, Q80ZJ6, P62869, Q8BZM1, Q3UFS0	4286	12	19662	2.29375	1	0.288844	0.229217
GOTERM_CC_DIRECT	GO:0042581~specific granule	6	0.135777	0.0987349	P97384, O09044, P51791, P70452, Q60770, O35639	4286	12	19662	2.29375	1	0.288844	0.229217
GOTERM_CC_DIRECT	GO:0017119~Golgi transport complex	6	0.135777	0.0987349	Q8R3I3, Q921L5, Q8BRF7, P55937, Q8CI04, Q8C0L8	4286	12	19662	2.29375	1	0.288844	0.229217
GOTERM_CC_DIRECT	GO:0012507~ER to Golgi transport vesicle membrane	6	0.135777	0.0987349	Q9Z1Z0, Q9D1M0, Q6NZC7, Q9D0I4, Q3UPL0, O88384	4286	12	19662	2.29375	1	0.288844	0.229217
GOTERM_CC_DIRECT	GO:0070971~endoplasmic reticulum exit site	8	0.181036	0.0991208	Q9WUQ2, Q9WU78, Q6NZC7, P12815, Q8BI84, Q91ZV0, P14428, Q3UPL0	4286	19	19662	1.93158	1	0.288844	0.229217
GOTERM_CC_DIRECT	GO:0043292~contractile fiber	8	0.181036	0.0991208	Q9DBR7, P23927, P23242, P21460, P14602, Q7TNV0, Q9QXS1, P31786	4286	19	19662	1.93158	1	0.288844	0.229217
GOTERM_CC_DIRECT	GO:0022626~cytosolic ribosome	8	0.181036	0.0991208	Q9CXW4, Q9DCU6, Q8BP48, P47962, P51910, Q8BP67, P14115, P62830	4286	19	19662	1.93158	1	0.288844	0.229217
GOTERM_CC_DIRECT	GO:0031305~integral component of mitochondrial inner membrane	8	0.181036	0.0991208	Q3UMR5, Q8BK08, Q921G7, P51175, Q8BSF4, Q9DCZ4, Q9Z0V7, Q66GT5	4286	19	19662	1.93158	1	0.288844	0.229217

## Sheet: 2-GO-molecular function
Supplemental Table S4-2. The GO analysis result of the 4422 proteins by molecular function (MF), using PANTHER (ver. 9.0).
Category number	Category name	Number of proteins	Percent of proteins against the total number (4422)
1	translation regulator activity (GO:0045182)	41	0.009
2	molecular transducer activity (GO:0060089)	75	0.017
3	molecular adaptor activity (GO:0060090)	67	0.015
4	binding (GO:0005488)	1318	0.299
5	structural molecule activity (GO:0005198)	113	0.026
6	molecular function regulator (GO:0098772)	234	0.053
7	catalytic activity (GO:0003824)	1269	0.288
8	transporter activity (GO:0005215)	227	0.051
