# Supplementary material for: Differential proteomic analysis of mouse cerebrums with high-fat diet (HFD)-induced hyperlipidemia
Source: PeerJ. 2022 Aug 3;10:e13806. doi: 10.7717/peerj.13806 (PMC9356585; doi:10.7717/peerj.13806)
Supplement: Supplemental Information 6 [file peerj-10-13806-s006.xlsx]

## Sheet: 1-324 dysregulated proteins
Supplemental Table S5-1. List of the dys-regulated proteins in the cerebrums of mice with HFD-induced hyperlipidemia.
1) Among the 4422 proteins submitted to the differential analysis (Supplemental Table S2-2), 324 proteins were detected to have significant dys-regulation (fold change >1.5 or <0.67, p <0.05) in at least one of the four comparisons, i.e., between the left cerebrums of the model and control groups, the right cerebrums of the model and control groups, the left cerebrums of the SIM and model groups,…
2) Column A: The first protein ID in the "Majority protein IDs" of the MaxQuant results.
3) Columns E-L: The fold changes were calculated with the mean quantities of the proteins in the two groups for the comparison. Technical replicates and biological replicates were treated equally, i.e., for each animal group and the same hemisphere, the data from the (3 animal groups × 3 animals =) 9 LC-MS/MS runs were used. A two-tailed, unpaired student's test was performed to examine if there …
4) NRP2_MOUSE (Nrp2), HMCS2_MOUSE (Hmgcs2), EGFR_MOUSE (Egfr) and ARC_MOUSE (Arc) were chosen for post-proteomic validation by western blotting. Their UniProtKB entry ID and names and protein and gene names were highlighted in yellow.
5) Column M: The database (UniProtKB) records and publications were examined for all the dys-regulated proteins and they could be generally classified into 6 categories, i.e. lipid processes-related, brain processes-related, enzyme catalysis, transport regulation, transcription regulation and others.
Protein ID	Entry name	Protein names	Gene	model vs control, left cerebrum		model vs control, right cerebrum		SIM vs model, left cerebrum		SIM vs model, right cerebrum		category
				Fold change	p value	Fold change	p value	Fold change	p value	Fold change	p value
A2AHG0	LZTS3_MOUSE	Leucine zipper putative tumor suppressor 3 (ProSAP-interacting protein 1) (ProSAPiP1)	Lzts3	1.10569	0.590566	1.90344	0.0306293	0.787169	0.141878	1.08655	0.59377	others
A3KFX0	5NT1A_MOUSE	Cytosolic 5'-nucleotidase 1A (cN1A) (EC 3.1.3.5) (Cytosolic 5'-nucleotidase IA) (cN-IA)	Nt5c1a	1.08771	0.786258	0.964417	0.89174	0.747447	0.44869	0.537847	0.0232947	enzyme catalysis
B1AVZ0	UPP_MOUSE	Uracil phosphoribosyltransferase homolog	Uprt	0.768542	0.393971	1.15577	0.30413	0.939438	0.85298	0.504877	0.0036703	others
B2RXR6	ANR44_MOUSE	Serine/threonine-protein phosphatase 6 regulatory ankyrin repeat subunit B (PP6-ARS-B) (Serine/threonine-protein phosphatase 6 regulatory subunit ARS-B) (Ankyrin repeat domain-containing protein 44)	Ankrd44	0.445137	0.0246944	0.454139	0.0198847	0.21557	0.106511	1.33149	0.525937	others
B7ZMP1	XPP3_MOUSE	Xaa-Pro aminopeptidase 3 (X-Pro aminopeptidase 3) (EC 3.4.11.9) (Aminopeptidase P3) (APP3)	Xpnpep3	0.32849	0.0480378	0.733851	0.205608	2.24599	0.0938796	0.854545	0.373689	enzyme catalysis
B9EJI9	T229A_MOUSE	Transmembrane protein 229A	Tmem229a	1.86243	0.0761548	1.04459	0.909755	0.493392	0.0290724	0.527116	0.211825	others
E9Q4N7	ARI1B_MOUSE	AT-rich interactive domain-containing protein 1B (ARID domain-containing protein 1B) (BRG1-associated factor 250b) (BAF250B)	Arid1b	0.550145	0.0148641	1.38562	0.183958	1.69027	0.0397995	0.846836	0.514623	brain processes-related
O08581	KCNK1_MOUSE	Potassium channel subfamily K member 1 (Inward rectifying potassium channel protein TWIK-1)	Kcnk1	1.02666	0.958345	0.849496	0.749214	0.331293	0.115033	0.154142	0.0313281	transport regulation
O08677	KNG1_MOUSE	Kininogen-1 [Cleaved into: Kininogen-1 heavy chain; Bradykinin; Kininogen-1 light chain]	Kng1	0.514175	0.0452518	0.476212	0.111155	1.71287	0.119418	1.06713	0.797408	others
O08715	AKAP1_MOUSE	A-kinase anchor protein 1, mitochondrial (Dual specificity A-kinase-anchoring protein 1) (D-AKAP-1) (Protein kinase A-anchoring protein 1) (PRKA1) (Spermatid A-kinase anchor protein) (S-AKAP)	Akap1	0.944448	0.762675	1.53317	0.0971408	1.046	0.84207	0.566938	0.0490974	others
O08784	TCOF_MOUSE	Treacle protein (Treacher Collins syndrome protein homolog)	Tcof1	1.17018	0.42035	1.06004	0.709285	0.657807	0.0487241	1.07925	0.670146	transcription regulation
O08908	P85B_MOUSE	Phosphatidylinositol 3-kinase regulatory subunit beta (PI3-kinase regulatory subunit beta) (PI3K regulatory subunit beta) (PtdIns-3-kinase regulatory subunit beta) (Phosphatidylinositol 3-kinase 85 kDa regulatory subunit beta) (PI3-kinase subunit p85-beta) (PtdIns-3-kinase regulatory subunit p85-beta)	Pik3r2	0.486515	0.0756224	1.26428	0.446057	1.84442	0.0424709	0.805708	0.567769	brain processes-related
O08992	SDCB1_MOUSE	Syntenin-1 (Scaffold protein Pbp1) (Syndecan-binding protein 1)	Sdcbp	1.72371	0.0182587	1.44731	0.075314	0.865182	0.421457	1.13995	0.388778	lipid processes-related
O09005	DEGS1_MOUSE	Sphingolipid delta(4)-desaturase DES1 (EC 1.14.19.17) (Degenerative spermatocyte homolog 1) (Dihydroceramide desaturase-1)	Degs1	0.80169	0.438011	1.87216	0.283476	0.32202	0.00334682	0.32583	0.126391	lipid processes-related
O35188	X3CL1_MOUSE	Fractalkine (FK) (C-X3-C motif chemokine 1) (CX3C membrane-anchored chemokine) (Neurotactin) (Small-inducible cytokine D1) [Cleaved into: Processed fractalkine]	Cx3cl1	3.03334	0.00765813	0.519947	0.273878	0.555561	0.0965657	1.68908	0.3754	brain processes-related
O35375	NRP2_MOUSE	Neuropilin-2 (Vascular endothelial cell growth factor 165 receptor 2)	Nrp2	0.206072	0.130237	0.291298	0.0120645	2.54647	0.34286	1.5457	0.420105	brain processes-related
O35607	BMPR2_MOUSE	Bone morphogenetic protein receptor type-2 (BMP type-2 receptor) (BMPR-2) (EC 2.7.11.30) (BRK-3) (Bone morphogenetic protein receptor type II) (BMP type II receptor) (BMPR-II)	Bmpr2	0.675075	0.148666	0.709255	0.194251	1.68158	0.0373795	0.922178	0.771268	others
O70250	PGAM2_MOUSE	Phosphoglycerate mutase 2 (EC 5.4.2.11) (EC 5.4.2.4) (BPG-dependent PGAM 2) (Muscle-specific phosphoglycerate mutase) (Phosphoglycerate mutase isozyme M) (PGAM-M)	Pgam2	1.23578	0.0248984	0.999986	0.999923	0.652965	0.0110455	0.981368	0.904039	enzyme catalysis
O70572	NSMA_MOUSE	Sphingomyelin phosphodiesterase 2 (EC 3.1.4.12) (Lyso-platelet-activating factor-phospholipase C) (Lyso-PAF-PLC) (Neutral sphingomyelinase) (N-SMase) (nSMase)	Smpd2	1.1499	0.527158	1.25005	0.36683	0.554597	0.0445209	0.523505	0.0195662	lipid processes-related
O88502	PDE8A_MOUSE	High affinity cAMP-specific and IBMX-insensitive 3',5'-cyclic phosphodiesterase 8A (MmPDE8) (EC 3.1.4.53)	Pde8a	0.931842	0.818271	0.321345	0.0215365	0.535503	0.112389	2.00465	0.0294845	brain processes-related
O89086	RBM3_MOUSE	RNA-binding protein 3 (RNA-binding motif protein 3)	Rbm3	0.121605	0.00792589	1.69138	0.107854	7.01963	0.050737	0.805076	0.54056	others
P01027	CO3_MOUSE	Complement C3 (HSE-MSF) [Cleaved into: Complement C3 beta chain; C3-beta-c (C3bc); Complement C3 alpha chain; C3a anaphylatoxin; Acylation stimulating protein (ASP) (C3adesArg); Complement C3b alpha' chain; Complement C3c alpha' chain fragment 1; Complement C3dg fragment; Complement C3g fragment; Complement C3d fragment; Complement C3f fragment; Complement C3c alpha' chain fragment 2]	C3	0.446341	0.00177577	0.326362	0.00124949	1.37264	0.01151	1.82625	0.000110851	lipid processes-related
P01867	IGG2B_MOUSE	Ig gamma-2B chain C region	Igh-3	0.376846	0.00256319	0.403829	0.0184696	1.46011	0.215693	1.73245	0.146023	others
P01872	IGHM_MOUSE	Immunoglobulin heavy constant mu [Cleaved into: Mu' chain (55 kDa mu' chain)]	Ighm	1.7273	0.00692034	1.84558	0.000793703	1.22887	0.48213	1.27987	0.424484	others
P84244	H33_MOUSE	Histone H3.3	H3f3a;H3f3c	1.40106	0.0307637	2.04526	0.00281442	0.956073	0.821565	0.755789	0.113511	others
P02535	K1C10_MOUSE	Keratin, type I cytoskeletal 10 (56 kDa cytokeratin) (Cytokeratin-10) (CK-10) (Keratin, type I cytoskeletal 59 kDa) (Keratin-10) (K10)	Krt10	1.16286	0.747972	0.330227	0.0402271	3.81197	0.0661223	0.984875	0.951127	others
P04919	B3AT_MOUSE	Band 3 anion transport protein (Anion exchange protein 1) (AE 1) (Anion exchanger 1) (MEB3) (Solute carrier family 4 member 1) (CD antigen CD233)	Slc4a1	0.6391	0.00331382	0.687389	0.0282325	1.02386	0.841281	0.970867	0.751328	transport regulation
P06537	GCR_MOUSE	Glucocorticoid receptor (GR) (Nuclear receptor subfamily 3 group C member 1)	Nr3c1	1.57793	0.0224424	0.784254	0.344783	0.683641	0.0957988	1.17515	0.476779	transcription regulation
P06802	ENPP1_MOUSE	Ectonucleotide pyrophosphatase/phosphodiesterase family member 1 (E-NPP 1) (Lymphocyte antigen 41) (Ly-41) (Phosphodiesterase I/nucleotide pyrophosphatase 1) (Plasma-cell membrane glycoprotein PC-1) [Cleaved into: Ectonucleotide pyrophosphatase/phosphodiesterase family member 1, secreted form] [Includes: Alkaline phosphodiesterase I (EC 3.1.4.1); Nucleotide pyrophosphatase (NPPase) (EC 3.6.1.9) (…	Enpp1	2.23862	0.171945	0.871074	0.663814	0.706939	0.411169	0.25318	0.045096	enzyme catalysis
P06909	CFAH_MOUSE	Complement factor H (Protein beta-1-H)	Cfh	0.587455	0.0234921	0.636236	0.124246	0.983495	0.947671	0.931194	0.729322	others
P07309	TTHY_MOUSE	Transthyretin (Prealbumin)	Ttr	1.16539	0.487766	0.85268	0.564874	0.415485	0.00347577	0.717354	0.298509	transport regulation
P07310	KCRM_MOUSE	Creatine kinase M-type (EC 2.7.3.2) (Creatine kinase M chain) (Creatine phosphokinase M-type) (CPK-M) (M-CK)	Ckm	1.85558	0.0668749	1.45147	0.448062	0.336422	0.0050091	0.182454	0.0280484	enzyme catalysis
P07356	ANXA2_MOUSE	Annexin A2 (Annexin II) (Annexin-2) (Calpactin I heavy chain) (Calpactin-1 heavy chain) (Chromobindin-8) (Lipocortin II) (Placental anticoagulant protein IV) (PAP-IV) (Protein I) (p36)	Anxa2	0.76218	0.0134673	0.964165	0.596777	1.50988	0.021713	1.11986	0.222245	lipid processes-related
P08032	SPTA1_MOUSE	Spectrin alpha chain, erythrocytic 1 (Erythroid alpha-spectrin)	Spta1	0.560306	0.146333	0.349914	0.000184528	0.990305	0.970691	1.21211	0.565967	others
P08122	CO4A2_MOUSE	Collagen alpha-2(IV) chain [Cleaved into: Canstatin]	Col4a2	1.13453	0.0495208	1.50401	0.000106934	0.909809	0.23937	0.843355	0.130162	lipid processes-related
P08775	RPB1_MOUSE	DNA-directed RNA polymerase II subunit RPB1 (RNA polymerase II subunit B1) (EC 2.7.7.6) (DNA-directed RNA polymerase II subunit A) (DNA-directed RNA polymerase III largest subunit)	Polr2a	1.14049	0.760029	0.588748	0.0479616	1.00949	0.976826	0.914682	0.815734	transcription regulation
P09470	ACE_MOUSE	Angiotensin-converting enzyme (ACE) (EC 3.2.1.-) (EC 3.4.15.1) (Dipeptidyl carboxypeptidase I) (Kininase II) (CD antigen CD143) [Cleaved into: Angiotensin-converting enzyme, soluble form]	Ace	1.17896	0.370288	0.876965	0.314846	0.47717	0.00276273	1.01012	0.953789	enzyme catalysis
P0DN34	NDUB1_MOUSE	NADH dehydrogenase [ubiquinone] 1 beta subcomplex subunit 1 (Complex I-MNLL) (CI-MNLL) (NADH-ubiquinone oxidoreductase MNLL subunit)	Ndufb1	0.61215	0.192238	0.540558	0.00996614	1.89679	0.0520456	1.84227	0.103404	others
P10711	TCEA1_MOUSE	Transcription elongation factor A protein 1 (Transcription elongation factor S-II protein 1) (Transcription elongation factor TFIIS.o)	Tcea1	1.76505	0.0160403	0.893867	0.691405	0.573129	0.0172681	0.748368	0.243935	transcription regulation
P11276	FINC_MOUSE	Fibronectin (FN) [Cleaved into: Anastellin]	Fn1	0.552362	0.0108273	0.635222	0.16601	1.03831	0.862809	0.940121	0.720139	others
P11404	FABPH_MOUSE	Fatty acid-binding protein, heart (Fatty acid-binding protein 3) (Heart-type fatty acid-binding protein) (H-FABP) (Mammary-derived growth inhibitor) (MDGI)	Fabp3	1.5651	0.0476382	1.28636	0.384693	1.39629	0.0559034	1.13702	0.596037	lipid processes-related
P11859	ANGT_MOUSE	Angiotensinogen (Serpin A8) [Cleaved into: Angiotensin-1 (Angiotensin 1-10) (Angiotensin I) (Ang I); Angiotensin-2 (Angiotensin 1-8) (Angiotensin II) (Ang II); Angiotensin-3 (Angiotensin 2-8) (Angiotensin III) (Ang III) (Des-Asp[1]-angiotensin II); Angiotensin-4 (Angiotensin 3-8) (Angiotensin IV) (Ang IV); Angiotensin 1-9; Angiotensin 1-7; Angiotensin 1-5; Angiotensin 1-4]	Agt	0.167087	0.00700427	0.400758	0.00192169	2.12057	0.361874	0.781844	0.567613	brain processes-related
P13634	CAH1_MOUSE	Carbonic anhydrase 1 (EC 4.2.1.1) (Carbonate dehydratase I) (Carbonic anhydrase I) (CA-I)	Ca1	0.656024	0.00024738	0.57557	0.000210068	0.813367	0.110554	1.03692	0.762461	enzyme catalysis
P15626	GSTM2_MOUSE	Glutathione S-transferase Mu 2 (EC 2.5.1.18) (GST 5-5) (GST class-mu 2) (Glutathione S-transferase pmGT2)	Gstm2	0.490554	0.00302905	0.852239	0.624759	1.11749	0.754068	1.33874	0.265332	lipid processes-related
P16014	SCG1_MOUSE	Secretogranin-1 (Chromogranin-B) (CgB) (Secretogranin I) (SgI) [Cleaved into: CCB peptide; PE-11]	Chgb	0.954605	0.826053	0.59661	0.242617	1.03358	0.850446	2.24296	0.00191379	others
P20934	EVI2A_MOUSE	Protein EVI2A (Ecotropic viral integration site 2A protein) (EVI-2A)	Evi2a	1.07746	0.687216	0.937669	0.793667	0.632008	0.039014	0.770609	0.181421	others
P21995	EMB_MOUSE	Embigin (Teratocarcinoma glycoprotein Gp-70)	Emb	1.1464	0.344278	0.651752	0.00157417	1.01971	0.901741	1.12565	0.366656	brain processes-related
P23198	CBX3_MOUSE	Chromobox protein homolog 3 (Heterochromatin protein 1 homolog gamma) (HP1 gamma) (M32) (Modifier 2 protein)	Cbx3	1.53132	0.0425923	0.911292	0.388725	0.859591	0.357101	1.12508	0.207281	transcription regulation
P23953	EST1C_MOUSE	Carboxylesterase 1C (EC 3.1.1.1) (Liver carboxylesterase N) (Lung surfactant convertase) (PES-N)	Ces1c	0.443332	0.00818366	0.734289	0.214621	1.35792	0.30975	0.823308	0.483993	lipid processes-related
P27573	MYP0_MOUSE	Myelin protein P0 (Myelin peripheral protein) (MPP) (Myelin protein zero)	Mpz	0.112411	0.0186165	1.89382	0.244713	5.28493	0.0534569	0.401035	0.154635	others
P28651	CAH8_MOUSE	Carbonic anhydrase-related protein (CARP) (Carbonic anhydrase VIII) (CA-VIII)	Ca8	0.388439	0.0454084	1.10916	0.834975	0.494499	0.240562	0.154355	0.0426022	others
P29699	FETUA_MOUSE	Alpha-2-HS-glycoprotein (Countertrypin) (Fetuin-A)	Ahsg	0.709098	0.0619516	0.603265	0.0201963	1.39501	0.0846302	1.04303	0.815884	others
P35123	UBP4_MOUSE	Ubiquitin carboxyl-terminal hydrolase 4 (EC 3.4.19.12) (Deubiquitinating enzyme 4) (Ubiquitin thioesterase 4) (Ubiquitin-specific-processing protease 4) (Ubiquitous nuclear protein)	Usp4	1.05977	0.858893	0.77193	0.297889	1.07524	0.828829	2.04524	0.0166467	enzyme catalysis
P35922	FMR1_MOUSE	Synaptic functional regulator FMR1 (Fragile X mental retardation protein 1 homolog) (FMRP) (Protein FMR-1) (mFmr1p)	Fmr1	0.975334	0.853768	1.54779	0.0298813	1.00714	0.956943	0.954436	0.776379	brain processes-related
P37804	TAGL_MOUSE	Transgelin (Actin-associated protein p27) (Smooth muscle protein 22-alpha) (SM22-alpha)	Tagln	0.92694	0.606738	0.809473	0.0589058	0.621617	0.0402052	0.832308	0.360991	others
P47955	RLA1_MOUSE	60S acidic ribosomal protein P1	Rplp1	0.747659	0.65366	0.266423	0.142801	0.971072	0.959926	3.55355	0.0493323	others
P48024	EIF1_MOUSE	Eukaryotic translation initiation factor 1 (eIF1) (Protein translation factor SUI1 homolog)	Eif1	1.31114	0.23421	0.774215	0.274984	0.483889	0.00485513	0.925262	0.790151	others
P50114	S100B_MOUSE	Protein S100-B (S-100 protein beta chain) (S-100 protein subunit beta) (S100 calcium-binding protein B)	S100b	0.607582	0.00746612	0.657059	0.00183881	1.16171	0.445331	0.998919	0.994846	brain processes-related
P51880	FABP7_MOUSE	Fatty acid-binding protein, brain (Brain lipid-binding protein) (BLBP) (Brain-type fatty acid-binding protein) (B-FABP) (Fatty acid-binding protein 7)	Fabp7	0.873379	0.674954	1.06444	0.840111	0.312984	0.00109064	0.670053	0.138924	brain processes-related
P51906	EAA3_MOUSE	Excitatory amino acid transporter 3 (Excitatory amino-acid carrier 1) (Sodium-dependent glutamate/aspartate transporter 3) (Solute carrier family 1 member 1)	Slc1a1	1.00273	0.991986	1.10744	0.801136	0.459286	0.00860426	0.933598	0.865738	brain processes-related
P51910	APOD_MOUSE	Apolipoprotein D (Apo-D) (ApoD)	Apod	0.836006	0.0198202	0.612173	0.0130475	0.964958	0.658212	0.906924	0.516942	lipid processes-related
P52623	UCK1_MOUSE	Uridine-cytidine kinase 1 (UCK 1) (EC 2.7.1.48) (Cytidine monophosphokinase 1) (Uridine monophosphokinase 1)	Uck1	0.407909	0.045055	0.829352	0.478542	2.30259	0.0630484	0.840273	0.655821	enzyme catalysis
P52760	RIDA_MOUSE	2-iminobutanoate/2-iminopropanoate deaminase (EC 3.5.99.10) (Heat-responsive protein 12) (Reactive intermediate imine deaminase A homolog) (Translation inhibitor L-PSP ribonuclease)	Hrsp12	1.1074	0.4327	0.98159	0.900456	0.608448	0.004094	0.934256	0.533903	others
P52795	EFNB1_MOUSE	Ephrin-B1 (CEK5 receptor ligand) (CEK5-L) (EFL-3) (ELK ligand) (ELK-L) (EPH-related receptor tyrosine kinase ligand 2) (LERK-2) (Stimulated by retinoic acid gene 1 protein) [Cleaved into: Ephrin-B1 C-terminal fragment (Ephrin-B1 CTF); Ephrin-B1 intracellular domain (Ephrin-B1 ICD)]	Efnb1	2.01371	0.0205083	0.561108	0.258277	0.72009	0.10341	1.38697	0.0750946	brain processes-related
P53996	CNBP_MOUSE	Cellular nucleic acid-binding protein (CNBP) (Zinc finger protein 9)	Cnbp	4.88951	0.0401222	0.689641	0.642505	0.755269	0.520647	0.749169	0.791201	transcription regulation
P54116	STOM_MOUSE	Stomatin (Erythrocyte band 7 integral membrane protein) (Erythrocyte membrane protein band 7.2) (Protein 7.2b)	Stom	0.369061	0.000328595	0.953032	0.907395	1.80495	0.118882	1.5227	0.191732	transport regulation
P54869	HMCS2_MOUSE	Hydroxymethylglutaryl-CoA synthase, mitochondrial (HMG-CoA synthase) (EC 2.3.3.10) (3-hydroxy-3-methylglutaryl coenzyme A synthase)	Hmgcs2	2.05442	0.463406	28.3899	0.0138906	0.115463	0.155117	0.143834	0.0249515	lipid processes-related
P55772	ENTP1_MOUSE	Ectonucleoside triphosphate diphosphohydrolase 1 (NTPDase 1) (EC 3.6.1.5) (Ecto-ATP diphosphohydrolase 1) (Ecto-ATPDase 1) (Ecto-ATPase 1) (Ecto-apyrase) (Lymphoid cell activation antigen) (CD antigen CD39)	Entpd1	0.713929	0.350462	0.553856	0.0761163	0.701716	0.354827	2.02995	0.0253074	others
P57722	PCBP3_MOUSE	Poly(rC)-binding protein 3 (Alpha-CP3)	Pcbp3	0.953318	0.887785	1.40588	0.160117	0.880092	0.724449	0.643697	0.016228	others
P57784	RU2A_MOUSE	U2 small nuclear ribonucleoprotein A' (U2 snRNP A')	Snrpa1	0.993436	0.966937	0.974811	0.926771	0.628674	0.0226949	1.0155	0.950019	others
P59326	YTHD1_MOUSE	YTH domain-containing family protein 1 (Dermatomyositis associated with cancer putative autoantigen 1 homolog) (DACA-1 homolog)	Ythdf1	0.650608	0.20317	1.36746	0.487633	1.84792	0.0178463	0.531686	0.217459	others
P59481	LMA2L_MOUSE	VIP36-like protein (Lectin mannose-binding 2-like) (LMAN2-like protein)	Lman2l	0.626741	0.00501243	0.948828	0.726167	1.46183	0.0223344	0.728868	0.0891311	others
P59648	FXYD7_MOUSE	FXYD domain-containing ion transport regulator 7	Fxyd7	1.35362	0.531333	0.938779	0.882649	1.85907	0.0485483	0.926354	0.820386	transport regulation
P61759	PFD3_MOUSE	Prefoldin subunit 3 (von Hippel-Lindau-binding protein 1) (VBP-1) (VHL-binding protein 1)	Vbp1	0.762834	0.178851	0.55092	0.0438247	1.09003	0.71927	1.28441	0.118771	others
P61967	AP1S1_MOUSE	AP-1 complex subunit sigma-1A (Adaptor protein complex AP-1 subunit sigma-1A) (Adaptor-related protein complex 1 subunit sigma-1A) (Clathrin assembly protein complex 1 sigma-1A small chain) (Clathrin coat assembly protein AP19) (Golgi adaptor HA1/AP1 adaptin sigma-1A subunit) (HA1 19 kDa subunit) (Sigma 1a subunit of AP-1 clathrin) (Sigma-adaptin 1A) (Sigma1A-adaptin)	Ap1s1	0.61844	0.411036	3.60776	0.0425228	0.683202	0.573452	0.378222	0.0920041	transport regulation
P62075	TIM13_MOUSE	Mitochondrial import inner membrane translocase subunit Tim13	Timm13	1.19066	0.514066	1.18417	0.58353	0.337894	0.0104032	0.89149	0.728146	transport regulation
P62267	RS23_MOUSE	40S ribosomal protein S23	Rps23	1.7181	0.158987	3.48235	0.0495397	0.493632	0.101093	1.60359	0.150748	others
P62737	ACTA_MOUSE	Actin, aortic smooth muscle (Alpha-actin-2) [Cleaved into: Actin, aortic smooth muscle, intermediate form]	Acta2	0.761661	0.051204	1.13723	0.565943	1.08657	0.419032	1.5671	0.00802974	others
P63040	CPLX1_MOUSE	Complexin-1 (921-S) (Complexin I) (CPX I) (Synaphin-2)	Cplx1	1.12363	0.684332	1.03701	0.891361	1.14538	0.485126	1.60884	0.0479618	brain processes-related
P63143	KCAB1_MOUSE	Voltage-gated potassium channel subunit beta-1 (EC 1.1.1.-) (K(+) channel subunit beta-1) (Kv-beta-1)	Kcnab1	1.18983	0.285807	1.63088	0.0439103	0.757172	0.116454	0.624189	0.0294437	transport regulation
P63168	DYL1_MOUSE	Dynein light chain 1, cytoplasmic (8 kDa dynein light chain) (DLC8) (Dynein light chain LC8-type 1) (Protein inhibitor of neuronal nitric oxide synthase) (PIN) (mPIN)	Dynll1	2.68132	0.0768629	2.40524	0.00859894	0.685697	0.362246	0.711541	0.171713	others
P63248	IPKA_MOUSE	cAMP-dependent protein kinase inhibitor alpha (PKI-alpha) (cAMP-dependent protein kinase inhibitor, muscle/brain isoform)	Pkia	0.70914	0.0808004	0.473696	0.00135645	1.32726	0.258155	1.56833	0.0196971	others
P68369	TBA1A_MOUSE	Tubulin alpha-1A chain (Alpha-tubulin 1) (Alpha-tubulin isotype M-alpha-1) (Tubulin alpha-1 chain) [Cleaved into: Detyrosinated tubulin alpha-1A chain]	Tuba1a;Tuba3a	1.0531	0.598551	1.36739	0.0693221	1.63544	0.0186786	1.17095	0.375345	others
P84084	ARF5_MOUSE	ADP-ribosylation factor 5	Arf5	1.03071	0.875483	1.35351	0.0389769	0.969556	0.87517	0.627876	0.0101583	transport regulation
P97318	DAB1_MOUSE	Disabled homolog 1	Dab1	0.515838	0.0679832	0.528268	0.259224	1.10423	0.851787	2.60333	0.0377086	brain processes-related
P97364	SPS2_MOUSE	Selenide, water dikinase 2 (EC 2.7.9.3) (Selenium donor protein 2) (Selenophosphate synthase 2)	Sephs2	0.296834	0.0454128	0.566215	0.436579	3.26933	0.0679457	3.06245	0.0361928	enzyme catalysis
P97785	GFRA1_MOUSE	GDNF family receptor alpha-1 (GDNF receptor alpha-1) (GDNFR-alpha-1) (GFR-alpha-1) (TGF-beta-related neurotrophic factor receptor 1)	Gfra1	1.09763	0.758509	0.71234	0.26992	2.20034	0.0127742	2.05712	0.0527119	brain processes-related
Q00897	A1AT4_MOUSE	Alpha-1-antitrypsin 1-4 (Alpha-1 protease inhibitor 4) (Serine protease inhibitor 1-4) (Serine protease inhibitor A1d) (Serpin A1d)	Serpina1d	0.594657	0.0304916	0.410598	0.0123469	0.656961	0.279212	1.25769	0.540433	others
Q01279	EGFR_MOUSE	Epidermal growth factor receptor (EC 2.7.10.1)	Egfr	0.878741	0.449851	0.658809	0.0338139	1.10468	0.576782	1.53736	0.00430041	lipid processes-related
Q01730	RSU1_MOUSE	Ras suppressor protein 1 (RSP-1) (Rsu-1)	Rsu1	1.02831	0.944029	0.629076	0.276687	0.401241	0.0477659	0.931737	0.861007	others
Q02566	MYH6_MOUSE	Myosin-6 (Myosin heavy chain 6) (Myosin heavy chain, cardiac muscle alpha isoform) (MyHC-alpha)	Myh6	177.513	0.126121	3.34627	0.0607328	0	0.124282	0.18604	0.0319321	others
Q05D44	IF2P_MOUSE	Eukaryotic translation initiation factor 5B (eIF-5B) (EC 3.6.5.3) (Translation initiation factor IF-2)	Eif5b	1.424	0.155152	1.5338	0.0401913	0.681824	0.102196	0.722007	0.0878056	others
Q09143	SL7A1_MOUSE	High affinity cationic amino acid transporter 1 (CAT-1) (CAT1) (Ecotropic retroviral leukemia receptor) (Ecotropic retrovirus receptor) (ERR) (Solute carrier family 7 member 1) (System Y+ basic amino acid transporter)	Slc7a1	0.694883	0.512677	0.297751	0.0230105	2.06994	0.150099	2.59001	0.0838406	transport regulation
Q0V8T9	CTP5A_MOUSE	Contactin-associated protein like 5-1 (Cell recognition molecule Caspr5-1) (Cell recognition molecule Caspr5a) (Contactin-associated protein-like 5a)	Cntnap5a;Cntnap5c	0.501704	0.0179701	0.837901	0.717579	1.15254	0.689954	1.08184	0.852879	brain processes-related
Q14B80	KCNC2_MOUSE	Potassium voltage-gated channel subfamily C member 2 (Shaw-like potassium channel) (Voltage-gated potassium channel Kv3.2)	Kcnc2	1.10422	0.661084	0.994738	0.98831	0.44324	0.00849706	1.06656	0.847943	transport regulation
Q2TA57	ASPH1_MOUSE	Aspartate beta-hydroxylase domain-containing protein 1 (EC 1.14.11.-)	Asphd1	0.579522	0.113051	0.547019	0.111023	1.29055	0.554306	2.27626	0.00927833	enzyme catalysis
Q2WF71	LRFN1_MOUSE	Leucine-rich repeat and fibronectin type III domain-containing protein 1 (Synaptic adhesion-like molecule 2) (Synaptic differentiation-enhancing molecule 1)	Lrfn1	1.10078	0.588956	0.624186	0.00260684	0.917526	0.585728	1.52728	0.0418178	brain processes-related
Q3LAC4	PREX2_MOUSE	Phosphatidylinositol 3,4,5-trisphosphate-dependent Rac exchanger 2 protein (P-Rex2) (PtdIns(3,4,5)-dependent Rac exchanger 2) (DEP domain-containing protein 2)	Prex2	1.54135	0.266993	1.83495	0.198709	0.265641	0.0178056	0.55846	0.194889	others
Q3TBW2	RM10_MOUSE	39S ribosomal protein L10, mitochondrial (L10mt) (MRP-L10)	Mrpl10	1.6092	0.137386	4.27264	0.0295436	0.689528	0.275259	0.674582	0.340275	others
Q3TC93	H1BP3_MOUSE	HCLS1-binding protein 3 (HS1-binding protein 3) (HSP1BP-3)	Hs1bp3	1.04537	0.929838	1.26988	0.529698	3.23959	0.0230121	1.48587	0.270502	others
Q3THK3	T2FA_MOUSE	General transcription factor IIF subunit 1 (Transcription initiation factor IIF subunit alpha) (TFIIF-alpha)	Gtf2f1	1.17103	0.296882	1.04389	0.864402	0.433506	0.00118063	1.09347	0.689188	transcription regulation
Q3TMP8	TM38A_MOUSE	Trimeric intracellular cation channel type A (TRIC-A) (TRICA) (27 kDa sarcoplasmic reticulum protein) (Mitsugumin-33A) (SPR-27) (Transmembrane protein 38A)	Tmem38a	0.608538	0.0365348	0.681419	0.0960484	0.751527	0.46513	1.19668	0.557206	transport regulation
Q3TPE9	ANKY2_MOUSE	Ankyrin repeat and MYND domain-containing protein 2	Ankmy2	0.664625	0.130444	1.01687	0.959813	1.56423	0.0869343	1.68957	0.0469676	others
Q3TWI9	CSCL2_MOUSE	CSC1-like protein 2 (Transmembrane protein 63B)	Tmem63b	1.93201	0.0558756	0.819033	0.709033	0.429967	0.0364261	1.16065	0.786163	transport regulation
Q3U1Y4	DEN4B_MOUSE	DENN domain-containing protein 4B (Brain-specific gene 4 protein) (Brain specific protein 4)	Dennd4b	0.385721	0.00368133	0.692218	0.411016	2.12911	0.0318771	1.19849	0.642695	others
Q3U9G9	LBR_MOUSE	Delta(14)-sterol reductase LBR (Delta-14-SR) (EC 1.3.1.70) (3-beta-hydroxysterol Delta (14)-reductase) (C-14 sterol reductase) (C14SR) (Integral nuclear envelope inner membrane protein) (Lamin-B receptor) (Sterol C14-reductase)	Lbr	0.933672	0.64014	0.971522	0.83631	0.633488	0.0310585	1.05539	0.678948	lipid processes-related
Q3UGX3	NAT8L_MOUSE	N-acetylaspartate synthetase (NAA synthetase) (EC 2.3.1.17) (N-acetyltransferase 8-like protein) (Protein Shati)	Nat8l	0.986342	0.967523	1.79539	0.007748	0.901303	0.76142	0.542061	0.00674968	brain processes-related
Q3UHD2	GFOD1_MOUSE	Glucose-fructose oxidoreductase domain-containing protein 1 (EC 1.-.-.-)	Gfod1	0.597461	0.312177	2.46951	0.134368	0.373218	0.0486122	0.836651	0.700761	enzyme catalysis
Q3UI43	BABA1_MOUSE	BRISC and BRCA1-A complex member 1 (Mediator of RAP80 interactions and targeting subunit of 40 kDa) (New component of the BRCA1-A complex)	Babam1	0.933943	0.864446	0.466931	0.00945913	0.832024	0.613193	1.28579	0.49403	others
Q3V038	TTC9A_MOUSE	Tetratricopeptide repeat protein 9A (TPR repeat protein 9A)	Ttc9	1.34292	0.485207	0.735566	0.315429	0.548402	0.24755	1.68602	0.034006	others
Q4QQM4	P5I11_MOUSE	Tumor protein p53-inducible protein 11 (Transformation related protein 53 inducible protein 11) (p53-induced gene 11 protein)	Trp53i11	0.58147	0.0108609	1.028	0.873122	1.43137	0.0325165	1.18177	0.141286	others
Q5SSZ5	TENS3_MOUSE	Tensin-3 (Tensin-like SH2 domain-containing protein 1)	Tns3	1.41265	0.219251	0.902722	0.634395	0.470269	0.0178427	0.805358	0.311093	others
Q5SU73	COIL_MOUSE	Coilin (p80-coilin)	Coil	0.866307	0.393973	0.561379	0.00943514	0.590076	0.0758347	1.35164	0.199155	others
Q60805	MERTK_MOUSE	Tyrosine-protein kinase Mer (EC 2.7.10.1) (Proto-oncogene c-Mer) (Receptor tyrosine kinase MerTK)	Mertk;Axl	0.484212	0.364753	1.56681	0.557662	5.10075	0.0110133	2.75767	0.125758	enzyme catalysis
Q61142	SPIN1_MOUSE	Spindlin-1 (30000 Mr metaphase complex) (SSEC P) (Spindlin1)	Spin1	0.592942	0.046136	0.787101	0.356222	1.56894	0.106608	1.4187	0.137666	lipid processes-related
Q61161	M4K2_MOUSE	Mitogen-activated protein kinase kinase kinase kinase 2 (EC 2.7.11.1) (Germinal center kinase) (GCK) (MAPK/ERK kinase kinase kinase 2) (MEK kinase kinase 2) (MEKKK 2) (Rab8-interacting protein)	Map4k2	0.780985	0.290878	0.653507	0.0151603	1.20541	0.392142	1.16603	0.363392	enzyme catalysis
Q61220	NELL2_MOUSE	Protein kinase C-binding protein NELL2 (MEL91 protein) (NEL-like protein 2)	Nell2	1.75142	0.100891	1.22833	0.485981	0.254901	0.00197665	0.370979	0.029903	others
Q61249	IGBP1_MOUSE	Immunoglobulin-binding protein 1 (Alpha4 phosphoprotein) (CD79a-binding protein 1) (Lymphocyte signal transduction molecule alpha 4) (Protein phosphatase 2/4/6 regulatory subunit) (p52)	Igbp1	0.421731	0.150744	0.218768	4.6357e-05	1.83952	0.273956	1.60732	0.335635	others
Q61387	COX7R_MOUSE	Cytochrome c oxidase subunit 7A-related protein, mitochondrial (Cytochrome c oxidase subunit VIIa-related protein) (Silica-induced gene 81 protein) (SIG-81) (Supercomplex assembly factor I)	Cox7a2l	0.958802	0.875445	0.751257	0.389429	1.25103	0.351139	1.84099	0.0235908	others
Q61625	GRID2_MOUSE	Glutamate receptor ionotropic, delta-2 (GluD2) (GluR delta-2 subunit)	Grid2	0.67795	0.0648314	0.913005	0.632089	0.602323	0.0309604	0.626017	0.0634062	transport regulation
Q61772	EPHA7_MOUSE	Ephrin type-A receptor 7 (EC 2.7.10.1) (Developmental kinase 1) (mDK-1) (EPH homology kinase 3) (EHK-3) (Embryonic brain kinase) (EBK)	Epha7	1.47966	0.407199	1.35183	0.566141	0.290564	0.0220656	0.76633	0.613417	brain processes-related
Q61923	KCNA6_MOUSE	Potassium voltage-gated channel subfamily A member 6 (MK1.6) (Voltage-gated potassium channel subunit Kv1.6)	Kcna6	1.41474	0.0920167	0.855803	0.509457	0.622039	0.0186261	0.797185	0.426054	transport regulation
Q61941	NNTM_MOUSE	NAD(P) transhydrogenase, mitochondrial (EC 7.1.1.1) (Nicotinamide nucleotide transhydrogenase) (Pyridine nucleotide transhydrogenase)	Nnt	0.434322	0.00861298	0.546239	0.0460625	2.4096	0.0551824	1.96477	0.103231	brain processes-related
Q62095	DDX3Y_MOUSE	ATP-dependent RNA helicase DDX3Y (EC 3.6.4.13) (D1Pas1-related sequence 1) (DEAD box protein 3, Y-chromosomal) (DEAD-box RNA helicase DEAD2) (mDEAD2)	Ddx3y	2.65698	0.0436444	1.30092	0.590985	0.993814	0.987061	0.981238	0.970765	enzyme catalysis
Q62172	RBP1_MOUSE	RalA-binding protein 1 (RalBP1) (Dinitrophenyl S-glutathione ATPase) (DNP-SG ATPase) (EC 7.6.2.2) (EC 7.6.2.3) (Ral-interacting protein 1)	Ralbp1	0.979718	0.949713	1.05978	0.862199	1.19868	0.557323	1.92063	0.0322928	transport regulation
Q62241	RU1C_MOUSE	U1 small nuclear ribonucleoprotein C (U1 snRNP C) (U1-C) (U1C)	Snrpc	1.09057	0.449742	0.940037	0.68138	0.642925	0.0185107	0.872346	0.512341	others
Q62245	SOS1_MOUSE	Son of sevenless homolog 1 (SOS-1) (mSOS-1)	Sos1	0.819392	0.409652	0.584308	0.0242024	0.737068	0.146517	1.17288	0.413634	others
Q63829	COMD3_MOUSE	COMM domain-containing protein 3 (Bmi-1 upstream gene protein) (Bup protein)	Commd3	0.840139	0.649338	0.772334	0.690153	0.742798	0.579837	0.159351	0.0321441	transport regulation
Q64444	CAH4_MOUSE	Carbonic anhydrase 4 (EC 4.2.1.1) (Carbonate dehydratase IV) (Carbonic anhydrase IV) (CA-IV)	Ca4	0.914364	0.407102	0.654749	0.0126117	1.1546	0.228723	1.65159	0.00949423	enzyme catalysis
Q64669	NQO1_MOUSE	NAD(P)H dehydrogenase [quinone] 1 (EC 1.6.5.2) (Azoreductase) (DT-diaphorase) (DTD) (Menadione reductase) (NAD(P)H:quinone oxidoreductase 1) (Phylloquinone reductase) (Quinone reductase 1) (QR1)	Nqo1	1.1774	0.665007	0.579517	0.364046	0.349435	0.00820592	1.4954	0.480259	enzyme catalysis
Q64676	CGT_MOUSE	2-hydroxyacylsphingosine 1-beta-galactosyltransferase (EC 2.4.1.47) (Ceramide UDP-galactosyltransferase) (Cerebroside synthase) (UDP-galactose-ceramide galactosyltransferase)	Ugt8	1.11688	0.564223	1.67976	0.000639867	0.898786	0.480925	0.751761	0.0112579	lipid processes-related
Q66T02	PKHG5_MOUSE	Pleckstrin homology domain-containing family G member 5 (PH domain-containing family G member 5) (Synectin-binding RhoA exchange factor) (SYX)	Plekhg5	1.23285	0.532432	0.395543	0.0124295	1.46924	0.186425	2.16187	0.0241767	others
Q689Z5	SBNO1_MOUSE	Protein strawberry notch homolog 1 (mSno1)	Sbno1	0.368497	0.00984552	0.699943	0.270492	1.85849	0.24899	1.1004	0.792856	brain processes-related
Q69ZP3	PNKD_MOUSE	Probable hydrolase PNKD (EC 3.-.-.-) (Myofibrillogenesis regulator 1) (MR-1) (Paroxysmal nonkinesiogenic dyskinesia protein)	Pnkd	1.10414	0.680447	0.733208	0.224673	0.521913	0.0381901	0.979225	0.949666	enzyme catalysis
Q69ZZ6	TMCC1_MOUSE	Transmembrane and coiled-coil domains protein 1	Tmcc1	1.6017	0.0891828	0.992978	0.978664	0.475102	0.00853683	0.601576	0.102243	transport regulation
Q6A009	LTN1_MOUSE	E3 ubiquitin-protein ligase listerin (EC 2.3.2.27) (RING finger protein 160) (RING-type E3 ubiquitin transferase listerin) (Zinc finger protein 294) (Zfp-294)	Ltn1	0.786476	0.41147	0.912682	0.68643	0.887705	0.708464	0.452679	0.0269068	enzyme catalysis
Q6A0D4	RFTN1_MOUSE	Raftlin (Raft-linking protein)	Rftn1	1.19318	0.667465	0.544915	0.0258494	0.694426	0.451541	1.16026	0.575109	others
Q6DFW0	CI072_MOUSE	Guanine nucleotide exchange C9orf72 homolog		0.643638	0.0497551	1.11849	0.517274	1.71008	0.03156	0.965319	0.727806	brain processes-related
Q6IEE6	T132E_MOUSE	Transmembrane protein 132E	Tmem132e	0.730966	0.237069	1.78962	0.0314848	1.19005	0.479361	0.737574	0.203204	others
Q6NSQ9	G6PC3_MOUSE	Glucose-6-phosphatase 3 (G-6-Pase 3) (G6Pase 3) (EC 3.1.3.9) (Ubiquitous glucose-6-phosphatase catalytic subunit-related protein)	G6pc3	1.04801	0.908055	2.47381	0.0245029	1.08325	0.833357	0.489915	0.073561	brain processes-related
Q6NWV3	IF122_MOUSE	Intraflagellar transport protein 122 homolog (WD repeat-containing protein 10)	Ift122	0.582985	0.205502	1.36497	0.344554	2.00914	0.0318258	0.445019	0.0490406	others
Q6P4T0	ATG2A_MOUSE	Autophagy-related protein 2 homolog A	Atg2a	2.55872	0.0850216	2.12947	0.145249	0.20583	0.0261774	0.669246	0.331266	lipid processes-related
Q6P4T1	SNX19_MOUSE	Sorting nexin-19	Snx19	0.439376	0.0131948	1.16042	0.675921	0.716345	0.523161	0.540006	0.119989	transport regulation
Q6P5G6	UBXN7_MOUSE	UBX domain-containing protein 7	Ubxn7	0.849679	0.495361	0.560138	0.0479177	0.970663	0.916943	1.43877	0.211307	others
Q6P5H6	FRMD5_MOUSE	FERM domain-containing protein 5	Frmd5	0.942885	0.711145	0.785959	0.103712	0.649427	0.0228428	0.661591	0.0239389	others
Q6P9J5	KANK4_MOUSE	KN motif and ankyrin repeat domain-containing protein 4 (Ankyrin repeat domain-containing protein 38)	Kank4	0.234028	0.0452851	1.74076	0.239599	2.04547	0.341996	0.508779	0.116361	others
Q6PE01	SNR40_MOUSE	U5 small nuclear ribonucleoprotein 40 kDa protein (U5 snRNP 40 kDa protein) (WD repeat-containing protein 57)	Snrnp40	0.729769	0.473634	0.874234	0.755772	0.29143	0.03309	0.417046	0.0135991	others
Q6PHS6	SNX13_MOUSE	Sorting nexin-13	Snx13	1.36323	0.421998	1.66423	0.217683	0.232612	0.0352131	0.686417	0.295777	transport regulation
Q6PIP5	NUDC1_MOUSE	NudC domain-containing protein 1	Nudcd1	1.08661	0.658595	0.870301	0.43959	0.588088	0.0010099	1.0004	0.998619	others
Q6PNC0	DMXL1_MOUSE	DmX-like protein 1 (X-like 1 protein)	Dmxl1	1.55281	0.0349585	1.28581	0.381722	0.702868	0.0957805	0.913705	0.792417	others
Q6VN19	RBP10_MOUSE	Ran-binding protein 10 (RanBP10)	Ranbp10	1.92278	0.131293	1.12699	0.769824	0.327139	0.0355898	0.935338	0.857603	others
Q6ZPS6	AKIB1_MOUSE	Ankyrin repeat and IBR domain-containing protein 1 (EC 2.3.2.31)	Ankib1	0.96575	0.84848	0.847545	0.328073	0.586915	0.0171556	0.733287	0.253543	enzyme catalysis
Q6ZWM4	LSM8_MOUSE	U6 snRNA-associated Sm-like protein LSm8	Lsm8	0.231131	0.00807372	1.54426	0.592318	1.90304	0.329463	2.26242	0.115557	others
Q761V0	SC6A5_MOUSE	Sodium- and chloride-dependent glycine transporter 2 (GlyT-2) (GlyT2) (Solute carrier family 6 member 5)	Slc6a5	0.804659	0.567008	0.835741	0.680812	0.358296	0.0436118	0.287251	0.0398882	brain processes-related
Q7TPH6	MYCB2_MOUSE	E3 ubiquitin-protein ligase MYCBP2 (EC 2.3.2.33) (Myc-binding protein 2) (Pam/highwire/rpm-1 protein) (Protein Magellan) (Protein associated with Myc)	Mycbp2	1.50664	0.00699113	0.95954	0.760554	0.92982	0.541705	1.0621	0.586963	brain processes-related
Q80TG9	LRFN2_MOUSE	Leucine-rich repeat and fibronectin type-III domain-containing protein 2	Lrfn2	0.460133	0.0160945	0.987629	0.954609	1.21141	0.498679	0.838915	0.542661	brain processes-related
Q80TT2	BAIP3_MOUSE	BAI1-associated protein 3 (BAP3) (Brain-specific angiogenesis inhibitor I-associated protein 3) (Baiap3)	Baiap3	1.10622	0.758253	0.463324	0.00324025	1.01764	0.9422	1.30558	0.288984	transport regulation
Q80U04	PJA2_MOUSE	E3 ubiquitin-protein ligase Praja-2 (Praja2) (EC 2.3.2.27) (RING finger protein 131) (RING-type E3 ubiquitin transferase Praja-2)	Pja2	0.956025	0.907701	0.408323	0.0282352	1.35531	0.388316	0.765708	0.567999	enzyme catalysis
Q80UP8	S20A2_MOUSE	Sodium-dependent phosphate transporter 2 (Phosphate transporter 2) (PiT-2) (Solute carrier family 20 member 2) (Type III sodium-dependent phosphate transporter)	Slc20a2	0.760571	0.644486	1.36664	0.496228	2.41767	0.159451	0.21148	0.0116852	transport regulation
Q80WT0	JPH4_MOUSE	Junctophilin-4 (JP-4) (Junctophilin-like 1 protein)	Jph4	1.84078	0.219704	0.996205	0.995512	0.250845	0.0466197	1.12682	0.829099	brain processes-related
Q80XG9	LRRT4_MOUSE	Leucine-rich repeat transmembrane neuronal protein 4	Lrrtm4	1.63228	0.0354823	1.05816	0.869912	0.702078	0.127554	0.947171	0.890231	brain processes-related
Q80XU3	NUCKS_MOUSE	Nuclear ubiquitous casein and cyclin-dependent kinase substrate 1 (JC7)	Nucks1	2.57203	0.0223596	1.20286	0.402092	0.443474	0.0337108	0.848437	0.354201	brain processes-related
Q80Y56	RBNS5_MOUSE	Rabenosyn-5 (FYVE finger-containing Rab5 effector protein rabenosyn-5) (RAB effector RBSN) (Zinc finger FYVE domain-containing protein 20)	Rbsn	1.15455	0.361588	0.578654	0.015483	0.773446	0.18492	1.08403	0.754673	transport regulation
Q80YE4	LMTK1_MOUSE	Serine/threonine-protein kinase LMTK1 (EC 2.7.11.1) (Apoptosis-associated tyrosine kinase) (AATYK) (Brain apoptosis-associated tyrosine kinase) (Lemur tyrosine kinase 1)	Aatk	1.06685	0.795077	0.474966	0.00553502	1.13571	0.448946	1.24364	0.465868	brain processes-related
Q80YE7	DAPK1_MOUSE	Death-associated protein kinase 1 (DAP kinase 1) (EC 2.7.11.1)	Dapk1	0.971676	0.957957	0.947833	0.941347	0.99641	0.99433	2.61062	0.0494764	others
Q80ZJ1	RAP2A_MOUSE	Ras-related protein Rap-2a (EC 3.6.5.2)	Rap2a	1.01863	0.90883	1.5132	0.0459884	1.30636	0.204324	1.02228	0.882835	enzyme catalysis
Q8BG95	MYPT2_MOUSE	Protein phosphatase 1 regulatory subunit 12B (Myosin phosphatase-targeting subunit 2) (Myosin phosphatase target subunit 2)	Ppp1r12b	0.350915	0.0187299	0.838308	0.720519	0.895075	0.849281	0.911081	0.828103	others
Q8BGD8	COA6_MOUSE	Cytochrome c oxidase assembly factor 6 homolog	Coa6	1.1745	0.418698	0.774561	0.52977	0.529611	0.00764323	0.571586	0.271824	others
Q8BGR9	UBCP1_MOUSE	Ubiquitin-like domain-containing CTD phosphatase 1 (EC 3.1.3.16) (Nuclear proteasome inhibitor UBLCP1)	Ublcp1	0.659541	0.0147263	0.92203	0.704909	1.48721	0.098323	1.404	0.11608	enzyme catalysis
Q8BH60	GOPC_MOUSE	Golgi-associated PDZ and coiled-coil motif-containing protein (PDZ protein interacting specifically with TC10) (PIST)	Gopc	1.41621	0.111932	1.05625	0.839956	0.595626	0.0298229	1.09495	0.654339	transport regulation
Q8BHK2	SCN3B_MOUSE	Sodium channel subunit beta-3	Scn3b	1.14286	0.765225	0.456389	0.02358	0.638189	0.318298	1.32473	0.438994	transport regulation
Q8BHL8	PSMF1_MOUSE	Proteasome inhibitor PI31 subunit	Psmf1	1.20614	0.224485	0.619039	0.00786473	0.984303	0.882008	1.33902	0.101593	others
Q8BHS3	RBM22_MOUSE	Pre-mRNA-splicing factor RBM22 (RNA-binding motif protein 22)	Rbm22	0.857127	0.56649	1.83408	0.0172959	0.967228	0.914888	0.650822	0.062375	others
Q8BIG7	CMTD1_MOUSE	Catechol O-methyltransferase domain-containing protein 1 (EC 2.1.1.-)	Comtd1	1.05648	0.875186	1.99022	0.00933348	1.41244	0.339369	0.825338	0.307553	enzyme catalysis
Q8BK03	MIGA2_MOUSE	Mitoguardin 2 (Protein FAM73B)	Fam73b	0.458087	0.026423	0.729162	0.198649	2.00935	0.0119979	1.10856	0.704627	lipid processes-related
Q8BLU0	FLRT2_MOUSE	Leucine-rich repeat transmembrane protein FLRT2 (Fibronectin leucine rich transmembrane protein 2)	Flrt2	0.63711	0.0803368	0.634209	0.0027931	1.5181	0.129314	1.67453	0.00177546	brain processes-related
Q8BM13	NOE2_MOUSE	Noelin-2 (Olfactomedin-2)	Olfm2	1.30332	0.10617	1.6112	0.0177461	0.729658	0.137214	0.850275	0.311219	brain processes-related
Q8BM85	TBCK_MOUSE	TBC domain-containing protein kinase-like protein	Tbck	0.870286	0.501739	0.976317	0.911845	0.890001	0.612496	0.623684	0.0482596	others
Q8BMZ5	SEN34_MOUSE	tRNA-splicing endonuclease subunit Sen34 (EC 4.6.1.16) (Leukocyte receptor cluster member 5 homolog) (tRNA-intron endonuclease Sen34)	Tsen34	0.253892	0.0154372	0.699833	0.523899	4.14712	0.0861785	0.898241	0.865502	enzyme catalysis
Q8BN59	LARP6_MOUSE	La-related protein 6 (Acheron) (Achn) (La ribonucleoprotein domain family member 6)	Larp6	1.23487	0.221666	0.817044	0.388369	0.543074	0.00379106	1.08446	0.748415	others
Q8BNA6	FAT3_MOUSE	Protocadherin Fat 3 (FAT tumor suppressor homolog 3)	Fat3	0.474068	0.0276015	0.630317	0.24685	1.95263	0.149916	1.04918	0.923929	brain processes-related
Q8BR86	KIRR3_MOUSE	Kin of IRRE-like protein 3 (Kin of irregular chiasm-like protein 3) (Nephrin-like protein 2) (mKirre) [Cleaved into: Processed kin of IRRE-like protein 3]	Kirrel3	0.174201	0.0263891	1.10774	0.865128	4.20168	0.098616	1.90855	0.127461	brain processes-related
Q8BSZ2	AP3S2_MOUSE	AP-3 complex subunit sigma-2 (AP-3 complex subunit sigma-3B) (Adaptor-related protein complex 3 subunit sigma-2) (Sigma-3B-adaptin) (Sigma3B-adaptin) (Sigma-adaptin 3b)	Ap3s2	1.13992	0.136111	0.667763	0.0146715	0.92302	0.253868	1.2142	0.354871	transport regulation
Q8BTU1	CFA20_MOUSE	Cilia- and flagella-associated protein 20 (Gene trap locus 3 protein)	Cfap20	0.37145	0.0497504	1.01738	0.952473	2.99644	0.016878	0.831929	0.575804	brain processes-related
Q8BXC6	COMD2_MOUSE	COMM domain-containing protein 2	Commd2	0.499208	0.141842	0.748982	0.552635	1.58072	0.363192	2.02234	0.028104	transcription regulation
Q8BXK8	AGAP1_MOUSE	Arf-GAP with GTPase, ANK repeat and PH domain-containing protein 1 (AGAP-1) (Centaurin-gamma-2) (Cnt-g2)	Agap1	0.97535	0.868256	1.31125	0.085175	0.722062	0.116444	0.659364	0.00788206	transport regulation
Q8BXR1	S7A14_MOUSE	Probable cationic amino acid transporter (Solute carrier family 7 member 14)	Slc7a14	1.504	0.054317	0.895695	0.579326	0.578204	0.0163021	1.10348	0.573542	transport regulation
Q8BYB9	PGLT1_MOUSE	Protein O-glucosyltransferase 1 (EC 2.4.1.376) (CAP10-like 46 kDa protein) (KTEL motif-containing protein 1) (O-glucosyltransferase Rumi homolog) (Rumi) (Protein O-xylosyltransferase POGLUT1) (EC 2.4.2.63) (Wing-shaped neural plate protein) (Wsnp)	Poglut1	0.49936	0.00707434	0.961653	0.919653	1.74366	0.0917914	1.21576	0.475849	others
Q8BYP3	RHOF_MOUSE	Rho-related GTP-binding protein RhoF	Rhof	1.90317	0.00669867	0.814323	0.384522	0.705741	0.09234	0.984806	0.962456	others
Q8BZZ3	WWP1_MOUSE	NEDD4-like E3 ubiquitin-protein ligase WWP1 (EC 2.3.2.26) (HECT-type E3 ubiquitin transferase WWP1) (WW domain-containing protein 1)	Wwp1	1.08476	0.762893	1.01853	0.96051	0.957517	0.88668	1.67445	0.0433737	enzyme catalysis
Q8C0D4	RHG12_MOUSE	Rho GTPase-activating protein 12 (Rho-type GTPase-activating protein 12)	Arhgap12	1.87413	0.0469729	0.765414	0.321971	0.294104	0.00713158	1.11574	0.678028	others
Q8C0J2	A16L1_MOUSE	Autophagy-related protein 16-1 (APG16-like 1)	Atg16l1	0.873688	0.488306	0.85479	0.360028	0.588096	0.0393666	1.17885	0.579352	transport regulation
Q8C172	CERS6_MOUSE	Ceramide synthase 6 (CerS6) (EC 2.3.1.-) (LAG1 longevity assurance homolog 6)	Cers6	0.851346	0.655345	2.13706	0.0932045	1.69551	0.0390731	1.64085	0.122659	lipid processes-related
Q8C181	MBNL2_MOUSE	Muscleblind-like protein 2	Mbnl2	0.884837	0.713172	1.94191	0.00996238	1.23256	0.538467	0.449144	0.00902896	others
Q8C3P7	MTA70_MOUSE	N6-adenosine-methyltransferase subunit METTL3 (EC 2.1.1.348) (Methyltransferase-like protein 3) (N6-adenosine-methyltransferase 70 kDa subunit) (MT-A70)	Mettl3	0.537298	0.302024	0.243908	0.0151273	3.95925	0.0769764	1.68784	0.411975	brain processes-related
Q8C547	HTR5B_MOUSE	HEAT repeat-containing protein 5B	Heatr5b	0.562809	0.011039	1.15046	0.584739	1.98128	0.00598837	1.35185	0.178491	transport regulation
Q8C6S9	CFA54_MOUSE	Cilia- and flagella-associated protein 54	Cfap54	0.769757	0.478349	0.332494	0.0129223	0.872468	0.79434	2.01143	0.28005	others
Q8CA72	GAN_MOUSE	Gigaxonin	Gan	0.545332	0.117407	0.900274	0.501839	1.42742	0.467813	0.508122	0.00297776	brain processes-related
Q8CAK1	CAF17_MOUSE	Putative transferase CAF17 homolog, mitochondrial (EC 2.1.-.-) (Iron-sulfur cluster assembly factor homolog)	Iba57	1.05945	0.629111	1.07523	0.712616	1.14316	0.212437	1.5407	0.00546405	enzyme catalysis
Q8CD92	TTC27_MOUSE	Tetratricopeptide repeat protein 27 (TPR repeat protein 27)	Ttc27	4.39995	0.0437535	0.677937	0.341929	0.705195	0.395558	1.25154	0.579817	others
Q8CES0	NAA30_MOUSE	N-alpha-acetyltransferase 30 (EC 2.3.1.256) (N-acetyltransferase 12) (N-acetyltransferase MAK3 homolog) (NatC catalytic subunit)	Naa30	2.43762	0.00702347	0.769122	0.28046	0.790742	0.295198	1.17772	0.440889	enzyme catalysis
Q8CGC4	LS14B_MOUSE	Protein LSM14 homolog B (RNA-associated protein 55B) (mRAP55B)	Lsm14b	1.80868	0.127041	0.640032	0.430082	0.324198	0.028854	1.978	0.200796	others
Q8CJG1	AGO1_MOUSE	Protein argonaute-1 (Argonaute1) (mAgo1) (Argonaute RISC catalytic component 1) (Eukaryotic translation initiation factor 2C 1) (eIF-2C 1) (eIF2C 1) (Piwi/argonaute family protein meIF2C1)	Ago1	0.867909	0.499501	1.73688	0.0033081	0.717429	0.153579	0.798262	0.293713	transcription regulation
Q8JZP9	GA2L1_MOUSE	GAS2-like protein 1 (Growth arrest-specific protein 2-like 1)	Gas2l1	1.30581	0.442494	1.04874	0.923286	0.349848	0.024998	1.34504	0.477158	others
Q8K070	SAM14_MOUSE	Sterile alpha motif domain-containing protein 14 (SAM domain-containing protein 14)	Samd14	1.00805	0.985458	1.15338	0.616303	0.664744	0.35801	0.373399	0.00828602	others
Q8K093	TRHDE_MOUSE	Thyrotropin-releasing hormone-degrading ectoenzyme (TRH-DE) (TRH-degrading ectoenzyme) (EC 3.4.19.6) (Pyroglutamyl-peptidase II) (PAP-II) (TRH-specific aminopeptidase) (Thyroliberinase)	Trhde	0.435195	0.0307189	0.925466	0.77927	1.43745	0.298467	0.811973	0.50454	enzyme catalysis
Q8K097	LFG2_MOUSE	Protein lifeguard 2 (Fas apoptotic inhibitory molecule 2) (Neural membrane protein 35)	Faim2	1.21512	0.0677665	1.23239	0.0995593	0.939788	0.705538	0.655144	0.00255468	brain processes-related
Q8K0X8	FEZ1_MOUSE	Fasciculation and elongation protein zeta-1 (Zygin I) (Zygin-1)	Fez1	1.06896	0.774788	0.854887	0.615432	0.499936	0.0302257	0.911274	0.78083	transport regulation
Q8K1E0	STX5_MOUSE	Syntaxin-5	Stx5	0.619784	0.0276163	0.780225	0.310106	1.32587	0.304332	0.981124	0.945181	transport regulation
Q8K1R3	PNPT1_MOUSE	Polyribonucleotide nucleotidyltransferase 1, mitochondrial (EC 2.7.7.8) (3'-5' RNA exonuclease OLD35) (PNPase old-35) (Polynucleotide phosphorylase 1) (PNPase 1) (Polynucleotide phosphorylase-like protein)	Pnpt1	1.60329	0.0379604	0.94424	0.813588	0.518676	0.00148926	0.744245	0.199032	transport regulation
Q8K209	AGRG1_MOUSE	Adhesion G-protein coupled receptor G1 (G-protein coupled receptor 56) (Serpentine receptor cyt28) [Cleaved into: ADGRG1 N-terminal fragment (ADGRG1 NT) (GPR56 N-terminal fragment) (GPR56 NT) (GPR56(N)) (GPR56 extracellular subunit) (GPR56 subunit alpha); ADGRG1 C-terminal fragment (ADGRG1-CT) (GPR56 C-terminal fragment) (GPR56 CT) (GPR56(C)) (GPR56 seven-transmembrane subunit) (GPR56 7TM) (GPR56…	Gpr56	0.752293	0.237804	0.865646	0.0933967	1.56879	0.0499132	1.00512	0.942916	brain processes-related
Q8K2Y9	CCM2_MOUSE	Cerebral cavernous malformations protein 2 homolog (Malcavernin) (Osmosensing scaffold for MEKK3)	Ccm2	1.27099	0.458159	0.6322	0.0372435	1.03157	0.907924	1.26355	0.323801	others
Q8K3C3	LZIC_MOUSE	Protein LZIC (Leucine zipper and CTNNBIP1 domain-containing protein) (Leucine zipper and ICAT homologous domain-containing protein)	Lzic	0.811247	0.486066	0.362536	0.00608229	0.569071	0.206994	1.56491	0.159732	brain processes-related
Q8QZT2	CCSAP_MOUSE	Centriole, cilia and spindle-associated protein	Ccsap	0.632862	0.0205882	0.938768	0.699238	1.22773	0.261741	1.06646	0.709629	others
Q8QZY9	SF3B4_MOUSE	Splicing factor 3B subunit 4	Sf3b4	1.24619	0.584699	4.18333	0.0202292	0.871046	0.725391	0.442039	0.075655	others
Q8R0A5	TCAL3_MOUSE	Transcription elongation factor A protein-like 3 (TCEA-like protein 3) (Transcription elongation factor S-II protein-like 3)	Tceal3;Tceal5	0.427291	0.0189288	0.750013	0.519206	1.23898	0.666747	0.811838	0.698615	others
Q8R0Y8	S2542_MOUSE	Mitochondrial coenzyme A transporter SLC25A42 (Solute carrier family 25 member 42)	Slc25a42	1.02047	0.907355	3.16156	6.28395e-05	1.15774	0.415482	0.864104	0.34806	transport regulation
Q8R124	KLH36_MOUSE	Kelch-like protein 36	Klhl36	0.662838	0.264429	0.546718	0.0148471	1.35404	0.392325	1.32178	0.311178	others
Q8R1T1	CHMP7_MOUSE	Charged multivesicular body protein 7 (Chromatin-modifying protein 7)	Chmp7	1.61949	0.0363914	1.69615	0.0413125	0.621964	0.0501096	0.916589	0.677447	others
Q8R3I3	COG6_MOUSE	Conserved oligomeric Golgi complex subunit 6 (COG complex subunit 6) (Component of oligomeric Golgi complex 6)	Cog6	1.30005	0.674883	0.407096	0.04895	0.406558	0.286918	1.24267	0.68678	transport regulation
Q8R409	HEXI1_MOUSE	Protein HEXIM1 (Cardiac lineage protein 1)	Hexim1	0.96661	0.91359	0.441317	0.0175651	0.514969	0.104554	0.394578	0.164271	transcription regulation
Q8R516	MIB2_MOUSE	E3 ubiquitin-protein ligase MIB2 (EC 2.3.2.27) (Dystrophin-like protein) (Dyslike) (Mind bomb homolog 2) (Mind bomb-2) (RING-type E3 ubiquitin transferase MIB2) (Skeletrophin)	Mib2	2.56185	0.0285674	1.09123	0.88763	0.524093	0.0532552	1.14875	0.847417	others
Q8VCM7	FIBG_MOUSE	Fibrinogen gamma chain	Fgg	0.753547	0.244761	0.529254	0.0472266	0.777878	0.110619	1.02513	0.830523	others
Q8VCV1	AB17C_MOUSE	Alpha/beta hydrolase domain-containing protein 17C (Abhydrolase domain-containing protein 17C) (EC 3.1.2.22)	Abhd17c	0.646542	0.0665819	1.15909	0.700509	1.48687	0.189472	1.58545	0.045615	enzyme catalysis
Q8VE97	SRSF4_MOUSE	Serine/arginine-rich splicing factor 4 (Splicing factor, arginine/serine-rich 4)	Srsf4	1.01592	0.953146	0.548607	0.0202508	0.676036	0.251618	0.941521	0.889724	others
Q8VEE4	RFA1_MOUSE	Replication protein A 70 kDa DNA-binding subunit (RP-A p70) (Replication factor A protein 1) (RF-A protein 1)	Rpa1	0.867482	0.550998	0.636363	0.0213533	1.04031	0.802819	0.9552	0.848274	others
Q8VHC3	SELM_MOUSE	Selenoprotein M (SelM)	Selm	0.579893	0.0275307	0.914796	0.752539	1.07448	0.786806	1.34563	0.306579	lipid processes-related
Q91VC7	PP14A_MOUSE	Protein phosphatase 1 regulatory subunit 14A (17 kDa PKC-potentiated inhibitory protein of PP1) (Protein kinase C-potentiated inhibitor protein of 17 kDa) (CPI-17)	Ppp1r14a	0.875531	0.495842	0.998543	0.994501	1.11517	0.602508	0.600769	0.0439164	others
Q91VH6	MEMO1_MOUSE	Protein MEMO1 (Mediator of ErbB2-driven cell motility 1) (Memo-1)	Memo1	0.415054	0.0305123	0.63389	0.315945	1.38948	0.406165	1.11764	0.794536	others
Q91VR7	MLP3A_MOUSE	Microtubule-associated proteins 1A/1B light chain 3A (Autophagy-related protein LC3 A) (Autophagy-related ubiquitin-like modifier LC3 A) (MAP1 light chain 3-like protein 1) (MAP1A/MAP1B light chain 3 A) (MAP1A/MAP1B LC3 A) (Microtubule-associated protein 1 light chain 3 alpha)	Map1lc3a	1.36073	0.360909	0.70042	0.35431	1.06698	0.818746	1.80219	0.0349601	others
Q91XI1	DUS3L_MOUSE	tRNA-dihydrouridine(47) synthase [NAD(P)(+)]-like (EC 1.3.1.-) (tRNA-dihydrouridine synthase 3-like)	Dus3l	1.32558	0.219504	0.502155	0.0124861	0.777305	0.313968	0.805476	0.585765	others
Q91XU0	WRIP1_MOUSE	ATPase WRNIP1 (EC 3.6.1.-) (Werner helicase-interacting protein 1)	Wrnip1	1.50989	0.088105	2.09379	0.0128942	1.08555	0.733413	0.840268	0.550892	enzyme catalysis
Q91YL2	RN126_MOUSE	E3 ubiquitin-protein ligase RNF126 (EC 2.3.2.27) (RING finger protein 126)	Rnf126	1.01477	0.917883	1.08487	0.683823	0.543676	0.00617497	0.822767	0.388077	enzyme catalysis
Q91Z38	TTC1_MOUSE	Tetratricopeptide repeat protein 1 (TPR repeat protein 1)	Ttc1	1.78833	0.0232707	0.956719	0.871587	0.717144	0.213057	1.19315	0.526692	others
Q91Z69	SRGP1_MOUSE	SLIT-ROBO Rho GTPase-activating protein 1 (srGAP1) (Rho GTPase-activating protein 13)	Srgap1	0.314639	0.00628024	0.365835	0.18363	3.0027	0.107685	1.68075	0.41716	brain processes-related
Q91ZV0	MIA2_MOUSE	Melanoma inhibitory activity protein 2 (CTAGE family member 5 ER export factor)	Mia2	0.65029	0.0443774	0.810076	0.395582	0.568387	0.0688475	1.11304	0.703195	lipid processes-related
Q922Y1	UBXN1_MOUSE	UBX domain-containing protein 1 (Protein 2B28) (SAPK substrate protein 1) (UBA/UBX 33.3 kDa protein) (mY33K)	Ubxn1	1.51076	0.278302	1.6164	0.0375041	1.01659	0.962576	0.63685	0.0155565	others
Q923Z0	GPC5B_MOUSE	G-protein coupled receptor family C group 5 member B (Retinoic acid-induced gene 2 protein) (RAIG-2)	Gprc5b	1.64954	0.0058549	1.13541	0.656723	0.442685	0.00127962	0.6101	0.0467262	brain processes-related
Q99020	ROAA_MOUSE	Heterogeneous nuclear ribonucleoprotein A/B (hnRNP A/B) (CArG-binding factor-A) (CBF-A)	Hnrnpab	1.19757	0.295063	1.65097	0.0369666	1.17508	0.175521	0.862854	0.459276	transcription regulation
Q99JW4	LIMS1_MOUSE	LIM and senescent cell antigen-like-containing domain protein 1 (Particularly interesting new Cys-His protein 1) (PINCH-1)	Lims1	0.487073	0.0155494	1.01149	0.966358	1.45677	0.146301	0.943665	0.837808	brain processes-related
Q99K48	NONO_MOUSE	Non-POU domain-containing octamer-binding protein (NonO protein)	Nono	1.34515	0.109116	1.14136	0.32546	0.639396	0.0390178	0.853335	0.189098	others
Q99KB8	GLO2_MOUSE	Hydroxyacylglutathione hydrolase, mitochondrial (EC 3.1.2.6) (Glyoxalase II) (Glx II)	Hagh	0.988544	0.951183	0.655259	0.0219921	0.941972	0.734492	1.27117	0.226826	enzyme catalysis
Q99LD9	EI2BB_MOUSE	Translation initiation factor eIF-2B subunit beta (eIF-2B GDP-GTP exchange factor subunit beta)	Eif2b2	0.995994	0.985134	0.789367	0.165357	0.488613	0.0497986	0.947533	0.786825	others
Q99MD9	NASP_MOUSE	Nuclear autoantigenic sperm protein (NASP)	Nasp	1.22191	0.680831	0.323021	0.0083095	1.18159	0.705243	1.18806	0.743622	others
Q99MR0	ACL6B_MOUSE	Actin-like protein 6B (53 kDa BRG1-associated factor B) (Actin-related protein Baf53b) (ArpN-alpha) (ArpNa) (BRG1-associated factor 53B) (BAF53B)	Actl6b	1.71148	0.043096	1.06715	0.793801	1.00948	0.969688	1.22065	0.444916	brain processes-related
Q99MR1	GGYF1_MOUSE	GRB10-interacting GYF protein 1 (PERQ amino acid-rich with GYF domain-containing protein 1)	Gigyf1	1.10666	0.755001	0.1693	0.00153884	0.977194	0.93711	2.82913	0.20243	others
Q99MS8	TPGS1_MOUSE	Tubulin polyglutamylase complex subunit 1 (PGs1) (p32)	Tpgs1	0.599803	0.150628	0.92912	0.740142	2.14648	0.0246021	0.838512	0.308243	others
Q99N87	RT05_MOUSE	28S ribosomal protein S5, mitochondrial (MRP-S5) (S5mt)	Mrps5	0.737243	0.0448848	1.166	0.472496	1.5933	0.00307374	0.812561	0.249466	others
Q99P58	RB27B_MOUSE	Ras-related protein Rab-27B (EC 3.6.5.2)	Rab27b	1.33654	0.0247933	0.828701	0.296558	0.604919	0.0249283	0.997925	0.991259	brain processes-related
Q9CPQ8	ATP5L_MOUSE	ATP synthase subunit g, mitochondrial (ATPase subunit g) (ATP synthase membrane subunit g)	Atp5l	1.09946	0.350946	1.52581	0.0282741	1.5087	0.0320314	0.920169	0.601611	transport regulation
Q9CQ06	RM24_MOUSE	39S ribosomal protein L24, mitochondrial (L24mt) (MRP-L24)	Mrpl24	0.944354	0.891756	1.59517	0.211977	1.97241	0.0382289	0.631937	0.271266	others
Q9CQ19	MYL9_MOUSE	Myosin regulatory light polypeptide 9 (Myosin regulatory light chain 2, smooth muscle isoform) (Myosin regulatory light chain 9)	Myl9	1.88333	0.336002	2.6648	0.0373798	0.672365	0.55094	1.1792	0.668706	others
Q9CQ85	TIM22_MOUSE	Mitochondrial import inner membrane translocase subunit Tim22	Timm22	0.709518	0.324504	0.615327	0.229719	1.45159	0.274467	2.95258	0.00161787	transport regulation
Q9CQ91	NDUA3_MOUSE	NADH dehydrogenase [ubiquinone] 1 alpha subcomplex subunit 3 (Complex I-B9) (CI-B9) (NADH-ubiquinone oxidoreductase B9 subunit)	Ndufa3	1.07015	0.673494	0.67505	0.0227243	0.754685	0.0750792	0.66766	0.033524	others
Q9CQA6	CHCH1_MOUSE	Coiled-coil-helix-coiled-coil-helix domain-containing protein 1 (28S ribosomal protein S37, mitochondrial) (MRP-S37)	Chchd1	0.708476	0.56571	0.34292	0.0463589	1.32223	0.669151	2.57924	0.111859	others
Q9CQP2	TPPC2_MOUSE	Trafficking protein particle complex subunit 2 (Sedlin)	Trappc2	1.01556	0.982269	0.550546	0.0714283	1.17878	0.790032	1.94348	0.0391425	others
Q9CQT1	MTNA_MOUSE	Methylthioribose-1-phosphate isomerase (M1Pi) (MTR-1-P isomerase) (EC 5.3.1.23) (S-methyl-5-thioribose-1-phosphate isomerase) (Translation initiation factor eIF-2B subunit alpha/beta/delta-like protein)	Mri1	0.488584	0.000342727	0.884313	0.643698	1.3864	0.116465	1.66689	0.25054	enzyme catalysis
Q9CQU3	RER1_MOUSE	Protein RER1	Rer1	1.4235	0.499194	1.45912	0.290044	0.319181	0.0416327	0.229493	0.0120582	others
Q9CR09	UFC1_MOUSE	Ubiquitin-fold modifier-conjugating enzyme 1 (Ufm1-conjugating enzyme 1)	Ufc1	0.49845	0.189847	9.72482	0.00695245	2.6409	0.302659	0.782161	0.491922	others
Q9CWR2	SMYD3_MOUSE	Histone-lysine N-methyltransferase SMYD3 (EC 2.1.1.354) (SET and MYND domain-containing protein 3) (Zinc finger MYND domain-containing protein 1)	Smyd3	0.365341	8.64563e-05	0.652253	0.259153	2.19551	0.019639	1.45448	0.250816	lipid processes-related
Q9CWZ3	RBM8A_MOUSE	RNA-binding protein 8A (RNA-binding motif protein 8A) (Ribonucleoprotein RBM8A)	Rbm8a	0.432707	0.0428231	0.591261	0.132871	2.51453	0.024174	1.20974	0.62172	others
Q9CZR3	TM40L_MOUSE	Mitochondrial import receptor subunit TOM40B (Protein TOMM40-like)	Tomm40l	1.50288	0.00924739	1.14704	0.224576	0.80821	0.117852	1.06033	0.594781	transport regulation
Q9CZR8	EFTS_MOUSE	Elongation factor Ts, mitochondrial (EF-Ts) (EF-TsMt)	Tsfm	1.03164	0.825841	0.778208	0.115334	0.970294	0.836001	1.54809	0.00499857	others
Q9D071	MMS19_MOUSE	MMS19 nucleotide excision repair protein homolog (MET18 homolog) (MMS19-like protein)	Mms19	0.597928	0.0167861	0.992448	0.957122	1.47445	0.067233	1.14133	0.333073	others
Q9D0A3	ARPIN_MOUSE	Arpin (Arp2/3 inhibition protein)	Arpin	0.190681	0.0167551	0.866337	0.761827	3.65239	0.0957817	0.872236	0.778377	others
Q9D0B6	PBDC1_MOUSE	Protein PBDC1 (Polysaccharide biosynthesis domain-containing protein 1)	Pbdc1	1.3993	0.218288	0.425873	0.033638	0.730397	0.215247	1.71076	0.0524504	others
Q9D0E3	LYSM1_MOUSE	LysM and putative peptidoglycan-binding domain-containing protein 1	Lysmd1	0.770366	0.248608	1.04719	0.781161	0.583369	0.0367684	0.997058	0.993702	others
Q9D187	CIA2B_MOUSE	Cytosolic iron-sulfur assembly component 2B (Mitotic spindle-associated MMXD complex subunit MIP18)	Fam96b	0.984196	0.977992	0.311365	0.0431327	0.883642	0.862899	1.66079	0.42406	brain processes-related
Q9D1F4	AKTS1_MOUSE	Proline-rich AKT1 substrate 1 (Proline-rich AKT substrate)	Akt1s1	0.575972	0.0506547	1.09768	0.695632	2.0279	0.00924188	1.04283	0.828205	brain processes-related
Q9D1H7	GET4_MOUSE	Golgi to ER traffic protein 4 homolog	Get4	0.739782	0.568571	0.450424	0.0177138	1.81017	0.121947	1.87236	0.0924895	transport regulation
Q9D1H8	RM53_MOUSE	39S ribosomal protein L53, mitochondrial (L53mt) (MRP-L53)	Mrpl53	0.719344	0.282536	0.811068	0.3275	1.71411	0.00623282	1.12578	0.660521	others
Q9D1I5	MCEE_MOUSE	Methylmalonyl-CoA epimerase, mitochondrial (EC 5.1.99.1) (DL-methylmalonyl-CoA racemase)	Mcee	0.872607	0.650492	0.551538	0.0181286	0.91848	0.823218	0.723758	0.399559	enzyme catalysis
Q9D1K7	CT027_MOUSE	UPF0687 protein C20orf27 homolog		0.981259	0.906681	0.660878	0.00961691	0.848933	0.255853	1.29039	0.147076	others
Q9D1N9	RM21_MOUSE	39S ribosomal protein L21, mitochondrial (L21mt) (MRP-L21)	Mrpl21	1.83794	0.00801793	0.66839	0.0179219	0.951618	0.752489	1.25351	0.300197	others
Q9D2V7	CORO7_MOUSE	Coronin-7 (Crn7) (70 kDa WD repeat tumor rejection antigen homolog)	Coro7	2.80973	0.000710319	2.40218	0.000628464	0.288269	0.00126278	0.498193	0.0681164	transport regulation
Q9D328	NACHO_MOUSE	Novel acetylcholine receptor chaperone (Peroxisomal membrane protein 52) (PMP52) (Transmembrane protein 35A)	Tmem35	1.3395	0.218896	0.846626	0.461758	0.48633	0.0227694	1.14384	0.571629	brain processes-related
Q9D338	RM19_MOUSE	39S ribosomal protein L19, mitochondrial (L19mt) (MRP-L19)	Mrpl19	1.2649	0.422844	1.58887	0.260613	0.472714	0.0327657	0.867092	0.640437	others
Q9D428	GOG7B_MOUSE	Golgin subfamily A member 7B	GOLGA7B	1.28338	0.36218	1.29572	0.239382	1.55355	0.0138252	0.741799	0.087031	others
Q9D7X1	KCTD4_MOUSE	BTB/POZ domain-containing protein KCTD4	Kctd4	0.939924	0.689437	0.662803	0.0215595	1.07352	0.662029	1.19439	0.426367	others
Q9D8S3	ARFG3_MOUSE	ADP-ribosylation factor GTPase-activating protein 3 (ARF GAP 3)	Arfgap3	0.929952	0.80611	1.20073	0.571732	0.857589	0.67164	0.371064	0.0411991	transport regulation
Q9D8X2	CC124_MOUSE	Coiled-coil domain-containing protein 124	Ccdc124	1.18416	0.527042	0.84507	0.629553	0.485581	0.00634227	1.13016	0.703293	others
Q9DBC3	CMTR1_MOUSE	Cap-specific mRNA (nucleoside-2'-O-)-methyltransferase 1 (EC 2.1.1.57) (Cap methyltransferase 1) (Cap1 2'O-ribose methyltransferase 1) (MTr1) (FtsJ methyltransferase domain-containing protein 2)	Cmtr1	0.807527	0.366097	0.323833	0.000715467	0.765828	0.540163	3.04115	0.0124669	brain processes-related
Q9DBG7	SRPRA_MOUSE	Signal recognition particle receptor subunit alpha (SR-alpha) (Docking protein alpha) (DP-alpha)	Srpr	0.269981	0.0448184	0.330881	0.0310525	0.981095	0.979687	2.71088	0.0643798	others
Q9DBH0	WWP2_MOUSE	NEDD4-like E3 ubiquitin-protein ligase WWP2 (EC 2.3.2.26) (HECT-type E3 ubiquitin transferase WWP2) (WW domain-containing protein 2)	Wwp2	0.264296	0.0250849	0.95645	0.920846	2.77185	0.088966	1.12013	0.832755	enzyme catalysis
Q9DBX2	PHLP_MOUSE	Phosducin-like protein (PHLP)	Pdcl	1.81873	0.20068	2.83904	0.0815246	0.543627	0.129254	0.106992	0.0131723	others
Q9DCJ1	LST8_MOUSE	Target of rapamycin complex subunit LST8 (TORC subunit LST8) (G protein beta subunit-like) (Protein GbetaL) (Mammalian lethal with SEC13 protein 8) (mLST8)	Mlst8	6.58842	0.0376705	1.44268	0.473723	0.217914	0.0517104	0.98496	0.98421	lipid processes-related
Q9DD18	DTD1_MOUSE	D-aminoacyl-tRNA deacylase 1 (DTD) (EC 3.1.1.96) (DNA-unwinding element-binding protein B) (DUE-B) (Gly-tRNA(Ala) deacylase)	Dtd1	2.882	0.0458898	1.19713	0.631085	0.435028	0.0854507	0.999763	0.999437	others
Q9EPK2	XRP2_MOUSE	Protein XRP2	Rp2	0.702278	0.268835	0.905429	0.763598	0.475817	0.0442894	1.36014	0.338057	transport regulation
Q9EQK7	ICMT_MOUSE	Protein-S-isoprenylcysteine O-methyltransferase (EC 2.1.1.100) (Isoprenylcysteine carboxylmethyltransferase) (Prenylated protein carboxyl methyltransferase) (PPMT) (Prenylcysteine carboxyl methyltransferase) (pcCMT)	Icmt	1.04333	0.859441	1.61136	0.306621	0.360986	0.0173766	0.423871	0.0445441	enzyme catalysis
Q9ERA0	TFCP2_MOUSE	Alpha-globin transcription factor CP2	Tfcp2	2.26772	0.0233244	1.51537	0.134364	0.496269	0.0202182	0.402184	0.0155759	transcription regulation
Q9ERB0	SNP29_MOUSE	Synaptosomal-associated protein 29 (SNAP-29) (Golgi SNARE of 32 kDa) (Gs32) (Soluble 29 kDa NSF attachment protein) (Vesicle-membrane fusion protein SNAP-29)	Snap29	0.708966	0.223087	1.36151	0.549102	0.574361	0.245934	0.14731	0.0323553	brain processes-related
Q9ERF3	WDR61_MOUSE	WD repeat-containing protein 61 (Meiotic recombination REC14 protein homolog) [Cleaved into: WD repeat-containing protein 61, N-terminally processed]	Wdr61	0.517461	0.00711243	1.13665	0.511839	1.0961	0.688934	0.831782	0.327694	transcription regulation
Q9ERR7	SEP15_MOUSE	Selenoprotein F (15 kDa selenoprotein)	Selenof	0.796299	0.586832	0.70936	0.357836	1.56846	0.267752	1.80301	0.0409355	lipid processes-related
Q9ERT9	PPR1A_MOUSE	Protein phosphatase 1 regulatory subunit 1A (Protein phosphatase inhibitor 1) (I-1) (IPP-1)	Ppp1r1a	0.485925	0.152188	0.444569	0.309267	3.44758	0.0154932	1.61261	0.328959	others
Q9ES74	NEK7_MOUSE	Serine/threonine-protein kinase Nek7 (EC 2.7.11.1) (Never in mitosis A-related kinase 7) (NimA-related protein kinase 7)	Nek7	1.26262	0.243531	1.05809	0.686062	0.672929	0.102154	0.452236	0.00165162	enzyme catalysis
Q9JI39	ABCBA_MOUSE	ATP-binding cassette sub-family B member 10, mitochondrial (ABC-mitochondrial erythroid protein) (ABC-me protein) (ATP-binding cassette transporter 10) (ABC transporter 10 protein)	Abcb10	1.24083	0.592013	0.356421	0.0328049	1.01166	0.972991	1.7545	0.143892	transport regulation
Q9JI78	NGLY1_MOUSE	Peptide-N(4)-(N-acetyl-beta-glucosaminyl)asparagine amidase (PNGase) (mPNGase) (EC 3.5.1.52) (N-glycanase 1) (Peptide:N-glycanase)	Ngly1	8.64276	0.0326529	1.78153	0.259902	0.48048	0.206317	1.81846	0.329827	enzyme catalysis
Q9JJ43	RFOX1_MOUSE	RNA binding protein fox-1 homolog 1 (Ataxin-2-binding protein 1) (Fox-1 homolog A)	Rbfox1	0.403072	0.0393137	0.82842	0.699491	1.64038	0.386493	0.542875	0.372293	brain processes-related
Q9JJ61	GLT16_MOUSE	Polypeptide N-acetylgalactosaminyltransferase 16 (EC 2.4.1.41) (Polypeptide GalNAc transferase 16) (GalNAc-T16) (Polypeptide GalNAc transferase-like protein 1) (GalNAc-T-like protein 1) (pp-GaNTase-like protein 1) (Polypeptide N-acetylgalactosaminyltransferase-like protein 1) (Protein-UDP acetylgalactosaminyltransferase-like protein 1) (UDP-GalNAc:polypeptide N-acetylgalactosaminyltransferase-lik…	Galnt16	0.749394	0.175247	0.577143	0.000388787	1.08795	0.681011	1.29282	0.164439	enzyme catalysis
Q9JJA9	GRASP_MOUSE	General receptor for phosphoinositides 1-associated scaffold protein (GRP1-associated scaffold protein)	Grasp	2.18254	0.0784232	0.365909	0.0132793	0.688529	0.292062	1.90957	0.245781	brain processes-related
Q9JJR9	NRIP3_MOUSE	Nuclear receptor-interacting protein 3	Nrip3	0.910591	0.840399	1.36537	0.298272	0.88536	0.72521	0.161027	0.0012245	others
Q9JK45	KCNQ5_MOUSE	Potassium voltage-gated channel subfamily KQT member 5 (KQT-like 5) (Potassium channel subunit alpha KvLQT5) (Voltage-gated potassium channel subunit Kv7.5)	Kcnq5	0.610859	0.193025	0.563101	0.0356555	0.992014	0.986694	1.40292	0.146456	brain processes-related
Q9JKD3	SCAM5_MOUSE	Secretory carrier-associated membrane protein 5 (Secretory carrier membrane protein 5)	Scamp5	0.746893	0.1843	1.52681	0.0268531	0.839665	0.479336	0.803724	0.190003	brain processes-related
Q9JKF1	IQGA1_MOUSE	Ras GTPase-activating-like protein IQGAP1	Iqgap1	0.691239	0.00802361	0.961812	0.700724	1.61371	0.000555754	0.932636	0.475977	brain processes-related
Q9JKY0	CNOT9_MOUSE	CCR4-NOT transcription complex subunit 9 (Cell differentiation protein RQCD1 homolog) (Rcd-1) (EPO-induced protein FL10)	Rqcd1	2.34369	0.0217281	1.04158	0.888766	0.641641	0.171015	1.14621	0.657351	transcription regulation
Q9JMA2	TGT_MOUSE	Queuine tRNA-ribosyltransferase catalytic subunit 1 (EC 2.4.2.64) (Guanine insertion enzyme) (tRNA-guanine transglycosylase)	Qtrt1	0.880134	0.744014	0.355149	0.0289657	0.571352	0.355702	1.04524	0.943185	enzyme catalysis
Q9JMD0	ZN207_MOUSE	BUB3-interacting and GLEBS motif-containing protein ZNF207 (BuGZ) (49 kDa zinc finger protein) (Zinc finger protein 207)	Znf207	0.929331	0.747833	2.23363	0.0701972	1.82679	0.0461641	0.781806	0.509182	others
Q9JMG1	EDF1_MOUSE	Endothelial differentiation-related factor 1 (EDF-1) (Multiprotein-bridging factor 1) (MBF1)	Edf1	1.28633	0.0106971	1.04049	0.811526	0.627809	0.032005	0.601251	0.0693604	transcription regulation
Q9QY81	PO210_MOUSE	Nuclear pore membrane glycoprotein 210 (Nuclear pore protein gp210) (Nuclear envelope pore membrane protein POM 210) (POM210) (Nucleoporin Nup210) (Pore membrane protein of 210 kDa)	Nup210	0.956042	0.83628	0.968126	0.919699	0.586468	0.0482925	0.717386	0.40656	transport regulation
Q9QYK9	KCC1B_MOUSE	Calcium/calmodulin-dependent protein kinase type 1B (EC 2.7.11.17) (CaM kinase I beta) (CaM kinase IB) (CaM-KI beta) (CaMKI-beta) (Pregnancy up-regulated non-ubiquitously-expressed CaM kinase homolog)	Pnck	1.73447	0.0845442	0.333129	0.0335014	0.797167	0.34132	1.90797	0.0680022	enzyme catalysis
Q9R008	KIME_MOUSE	Mevalonate kinase (MK) (EC 2.7.1.36)	Mvk	0.689514	0.370927	1.09353	0.487926	0.901632	0.486903	0.611255	0.023874	lipid processes-related
Q9R0A0	PEX14_MOUSE	Peroxisomal membrane protein PEX14 (PTS1 receptor-docking protein) (Peroxin-14) (Peroxisomal membrane anchor protein PEX14)	Pex14	1.42634	0.0695067	0.531195	0.0109652	0.87374	0.521772	1.56404	0.0725747	transport regulation
Q9R0N8	SYT6_MOUSE	Synaptotagmin-6 (Synaptotagmin VI) (SytVI)	Syt6	0.898456	0.602161	0.511602	0.00452255	0.62825	0.168783	1.12751	0.669201	brain processes-related
Q9R0P4	SMAP_MOUSE	Small acidic protein (Sid 2057)	Smap	0.775811	0.516411	0.845649	0.638073	0.852411	0.736809	0.480853	0.0254739	others
Q9WU28	PFD5_MOUSE	Prefoldin subunit 5 (EIG-1) (Myc modulator 1) (c-Myc-binding protein Mm-1)	Pfdn5	1.72816	0.0239998	1.32039	0.169454	0.681254	0.149409	0.713154	0.223825	brain processes-related
Q9WV31	ARC_MOUSE	Activity-regulated cytoskeleton-associated protein (mArc) (Activity-regulated gene 3.1 protein) (ARC/ARG3.1) (Arg3.1)	Arc	1.09185	0.86542	1.86795	0.0284706	0.596509	0.416874	0.596906	0.044726	brain processes-related
Q9WVD5	ORNT1_MOUSE	Mitochondrial ornithine transporter 1 (Solute carrier family 25 member 15)	Slc25a15	1.47935	0.379515	0.322764	0.0380425	0.445755	0.118891	1.52139	0.575789	transport regulation
Q9Z0G0	GIPC1_MOUSE	PDZ domain-containing protein GIPC1 (GAIP C-terminus-interacting protein) (RGS-GAIP-interacting protein) (RGS19-interacting protein 1) (SemaF cytoplasmic domain-associated protein 1) (SEMCAP-1) (Synectin)	Gipc1	1.04847	0.809507	0.892177	0.576521	0.503184	0.011811	0.984388	0.940501	others
Q9Z0N2	IF2H_MOUSE	Eukaryotic translation initiation factor 2 subunit 3, Y-linked (EC 3.6.5.3) (Eukaryotic translation initiation factor 2 subunit gamma, Y-linked) (eIF-2-gamma Y) (Spermatogonial proliferation factor) (Spy)	Eif2s3y	0.814486	0.688273	4.5938	0.0274382	0.595846	0.362172	0.43865	0.106131	enzyme catalysis
Q9Z0W3	NU160_MOUSE	Nuclear pore complex protein Nup160 (160 kDa nucleoporin) (Gene trap locus 1-13 protein) (GTL-13) (Nucleoporin Nup160)	Nup160	0.415655	4.63656e-05	0.834926	0.423946	2.09207	0.00147439	1.29966	0.203183	transport regulation
Q9Z1P6	NDUA7_MOUSE	NADH dehydrogenase [ubiquinone] 1 alpha subcomplex subunit 7 (Complex I-B14.5a) (CI-B14.5a) (NADH-ubiquinone oxidoreductase subunit B14.5a)	Ndufa7	0.874898	0.505325	1.60381	0.0487853	1.23723	0.486249	0.794619	0.248596	others
Q9Z277	BAZ1B_MOUSE	Tyrosine-protein kinase BAZ1B (EC 2.7.10.2) (Bromodomain adjacent to zinc finger domain protein 1B) (Williams syndrome transcription factor homolog) (Williams-Beuren syndrome chromosomal region 9 protein homolog)	Baz1b	0.725011	0.537312	1.6926	0.383203	0.133194	0.0410435	0.335449	0.107007	transcription regulation
Q9Z2L6	MINP1_MOUSE	Multiple inositol polyphosphate phosphatase 1 (EC 3.1.3.62) (2,3-bisphosphoglycerate 3-phosphatase) (2,3-BPG phosphatase) (EC 3.1.3.80) (Inositol (1,3,4,5)-tetrakisphosphate 3-phosphatase) (Ins(1,3,4,5)P(4) 3-phosphatase)	Minpp1	1.08367	0.823475	0.549769	0.0256759	0.876059	0.628281	1.47586	0.303458	enzyme catalysis
Q9Z2M7	PMM2_MOUSE	Phosphomannomutase 2 (PMM 2) (EC 5.4.2.8)	Pmm2	0.919137	0.598057	0.515857	0.013309	0.948157	0.708267	1.47703	0.0732105	enzyme catalysis

## Sheet: 2-24 lipid processes-related
Supplemental Table S5-2. The lipid-related dys-regulated proteins.
1) The 24 lipid processes-related proteins in Table S5-1 (see Column M) were listed here. Two proteins were chosen to be validated by western blotting (cells filled with yellow).
Protein ID	Entry name	Protein names	Gene	model vs control, left cerebrum		model vs control, right cerebrum		SIM vs model, left cerebrum		SIM vs model, right cerebrum		category
				Fold change	p value	Fold change	p value	Fold change	p value	Fold change	p value
O08992	SDCB1_MOUSE	Syntenin-1 (Scaffold protein Pbp1) (Syndecan-binding protein 1)	Sdcbp	1.72371	0.0182587	1.44731	0.075314	0.865182	0.421457	1.13995	0.388778	lipid processes-related
O09005	DEGS1_MOUSE	Sphingolipid delta(4)-desaturase DES1 (EC 1.14.19.17) (Degenerative spermatocyte homolog 1) (Dihydroceramide desaturase-1)	Degs1	0.80169	0.438011	1.87216	0.283476	0.32202	0.00334682	0.32583	0.126391	lipid processes-related
O70572	NSMA_MOUSE	Sphingomyelin phosphodiesterase 2 (EC 3.1.4.12) (Lyso-platelet-activating factor-phospholipase C) (Lyso-PAF-PLC) (Neutral sphingomyelinase) (N-SMase) (nSMase)	Smpd2	1.1499	0.527158	1.25005	0.36683	0.554597	0.0445209	0.523505	0.0195662	lipid processes-related
P01027	CO3_MOUSE	Complement C3 (HSE-MSF) [Cleaved into: Complement C3 beta chain; C3-beta-c (C3bc); Complement C3 alpha chain; C3a anaphylatoxin; Acylation stimulating protein (ASP) (C3adesArg); Complement C3b alpha' chain; Complement C3c alpha' chain fragment 1; Complement C3dg fragment; Complement C3g fragment; Complement C3d fragment; Complement C3f fragment; Complement C3c alpha' chain fragment 2]	C3	0.446341	0.00177577	0.326362	0.00124949	1.37264	0.01151	1.82625	0.000110851	lipid processes-related
P07356	ANXA2_MOUSE	Annexin A2 (Annexin II) (Annexin-2) (Calpactin I heavy chain) (Calpactin-1 heavy chain) (Chromobindin-8) (Lipocortin II) (Placental anticoagulant protein IV) (PAP-IV) (Protein I) (p36)	Anxa2	0.76218	0.0134673	0.964165	0.596777	1.50988	0.021713	1.11986	0.222245	lipid processes-related
P08122	CO4A2_MOUSE	Collagen alpha-2(IV) chain [Cleaved into: Canstatin]	Col4a2	1.13453	0.0495208	1.50401	0.000106934	0.909809	0.23937	0.843355	0.130162	lipid processes-related
P11404	FABPH_MOUSE	Fatty acid-binding protein, heart (Fatty acid-binding protein 3) (Heart-type fatty acid-binding protein) (H-FABP) (Mammary-derived growth inhibitor) (MDGI)	Fabp3	1.5651	0.0476382	1.28636	0.384693	1.39629	0.0559034	1.13702	0.596037	lipid processes-related
P15626	GSTM2_MOUSE	Glutathione S-transferase Mu 2 (EC 2.5.1.18) (GST 5-5) (GST class-mu 2) (Glutathione S-transferase pmGT2)	Gstm2	0.490554	0.00302905	0.852239	0.624759	1.11749	0.754068	1.33874	0.265332	lipid processes-related
P23953	EST1C_MOUSE	Carboxylesterase 1C (EC 3.1.1.1) (Liver carboxylesterase N) (Lung surfactant convertase) (PES-N)	Ces1c	0.443332	0.00818366	0.734289	0.214621	1.35792	0.30975	0.823308	0.483993	lipid processes-related
P51910	APOD_MOUSE	Apolipoprotein D (Apo-D) (ApoD)	Apod	0.836006	0.0198202	0.612173	0.0130475	0.964958	0.658212	0.906924	0.516942	lipid processes-related
Q9DCJ1	LST8_MOUSE	Target of rapamycin complex subunit LST8 (TORC subunit LST8) (G protein beta subunit-like) (Protein GbetaL) (Mammalian lethal with SEC13 protein 8) (mLST8)	Mlst8	6.58842	0.0376705	1.44268	0.473723	0.217914	0.0517104	0.98496	0.98421	lipid processes-related
P54869	HMCS2_MOUSE	Hydroxymethylglutaryl-CoA synthase, mitochondrial (HMG-CoA synthase) (EC 2.3.3.10) (3-hydroxy-3-methylglutaryl coenzyme A synthase)	Hmgcs2	2.05442	0.463406	28.3899	0.0138906	0.115463	0.155117	0.143834	0.0249515	lipid processes-related
Q01279	EGFR_MOUSE	Epidermal growth factor receptor (EC 2.7.10.1)	Egfr	0.878741	0.449851	0.658809	0.0338139	1.10468	0.576782	1.53736	0.00430041	lipid processes-related
Q3U9G9	LBR_MOUSE	Delta(14)-sterol reductase LBR (Delta-14-SR) (EC 1.3.1.70) (3-beta-hydroxysterol Delta (14)-reductase) (C-14 sterol reductase) (C14SR) (Integral nuclear envelope inner membrane protein) (Lamin-B receptor) (Sterol C14-reductase)	Lbr	0.933672	0.64014	0.971522	0.83631	0.633488	0.0310585	1.05539	0.678948	lipid processes-related
Q61142	SPIN1_MOUSE	Spindlin-1 (30000 Mr metaphase complex) (SSEC P) (Spindlin1)	Spin1	0.592942	0.046136	0.787101	0.356222	1.56894	0.106608	1.4187	0.137666	lipid processes-related
Q64676	CGT_MOUSE	2-hydroxyacylsphingosine 1-beta-galactosyltransferase (EC 2.4.1.47) (Ceramide UDP-galactosyltransferase) (Cerebroside synthase) (UDP-galactose-ceramide galactosyltransferase)	Ugt8	1.11688	0.564223	1.67976	0.000639867	0.898786	0.480925	0.751761	0.0112579	lipid processes-related
Q6P4T0	ATG2A_MOUSE	Autophagy-related protein 2 homolog A	Atg2a	2.55872	0.0850216	2.12947	0.145249	0.20583	0.0261774	0.669246	0.331266	lipid processes-related
Q8BK03	MIGA2_MOUSE	Mitoguardin 2 (Protein FAM73B)	Fam73b	0.458087	0.026423	0.729162	0.198649	2.00935	0.0119979	1.10856	0.704627	lipid processes-related
Q8C172	CERS6_MOUSE	Ceramide synthase 6 (CerS6) (EC 2.3.1.-) (LAG1 longevity assurance homolog 6)	Cers6	0.851346	0.655345	2.13706	0.0932045	1.69551	0.0390731	1.64085	0.122659	lipid processes-related
Q9ERR7	SEP15_MOUSE	Selenoprotein F (15 kDa selenoprotein)	Selenof	0.796299	0.586832	0.70936	0.357836	1.56846	0.267752	1.80301	0.0409355	lipid processes-related
Q91ZV0	MIA2_MOUSE	Melanoma inhibitory activity protein 2 (CTAGE family member 5 ER export factor)	Mia2	0.65029	0.0443774	0.810076	0.395582	0.568387	0.0688475	1.11304	0.703195	lipid processes-related
Q8VHC3	SELM_MOUSE	Selenoprotein M (SelM)	Selm	0.579893	0.0275307	0.914796	0.752539	1.07448	0.786806	1.34563	0.306579	lipid processes-related
Q9CWR2	SMYD3_MOUSE	Histone-lysine N-methyltransferase SMYD3 (EC 2.1.1.354) (SET and MYND domain-containing protein 3) (Zinc finger MYND domain-containing protein 1)	Smyd3	0.365341	8.64563e-05	0.652253	0.259153	2.19551	0.019639	1.45448	0.250816	lipid processes-related
Q9R008	KIME_MOUSE	Mevalonate kinase (MK) (EC 2.7.1.36)	Mvk	0.689514	0.370927	1.09353	0.487926	0.901632	0.486903	0.611255	0.023874	lipid processes-related

## Sheet: 3-58 brain processes-related
Supplemental Table S5-3. The brain-related dys-regulated proteins.
1) The 58 brain processes-related proteins in Table S5-1 (see Column M) were listed here. Two proteins were chosen to be validated by western blotting (cells filled with yellow).
Protein ID	Entry name	Protein names	Gene	model vs control, left cerebrum		model vs control, right cerebrum		SIM vs model, left cerebrum		SIM vs model, right cerebrum		category
				Fold change	p value	Fold change	p value	Fold change	p value	Fold change	p value
E9Q4N7	ARI1B_MOUSE	AT-rich interactive domain-containing protein 1B (ARID domain-containing protein 1B) (BRG1-associated factor 250b) (BAF250B)	Arid1b	0.550145	0.0148641	1.38562	0.183958	1.69027	0.0397995	0.846836	0.514623	brain processes-related
O08908	P85B_MOUSE	Phosphatidylinositol 3-kinase regulatory subunit beta (PI3-kinase regulatory subunit beta) (PI3K regulatory subunit beta) (PtdIns-3-kinase regulatory subunit beta) (Phosphatidylinositol 3-kinase 85 kDa regulatory subunit beta) (PI3-kinase subunit p85-beta) (PtdIns-3-kinase regulatory subunit p85-beta)	Pik3r2	0.486515	0.0756224	1.26428	0.446057	1.84442	0.0424709	0.805708	0.567769	brain processes-related
O35188	X3CL1_MOUSE	Fractalkine (FK) (C-X3-C motif chemokine 1) (CX3C membrane-anchored chemokine) (Neurotactin) (Small-inducible cytokine D1) [Cleaved into: Processed fractalkine]	Cx3cl1	3.03334	0.00765813	0.519947	0.273878	0.555561	0.0965657	1.68908	0.3754	brain processes-related
O35375	NRP2_MOUSE	Neuropilin-2 (Vascular endothelial cell growth factor 165 receptor 2)	Nrp2	0.206072	0.130237	0.291298	0.0120645	2.54647	0.34286	1.5457	0.420105	brain processes-related
O88502	PDE8A_MOUSE	High affinity cAMP-specific and IBMX-insensitive 3',5'-cyclic phosphodiesterase 8A (MmPDE8) (EC 3.1.4.53)	Pde8a	0.931842	0.818271	0.321345	0.0215365	0.535503	0.112389	2.00465	0.0294845	brain processes-related
P11859	ANGT_MOUSE	Angiotensinogen (Serpin A8) [Cleaved into: Angiotensin-1 (Angiotensin 1-10) (Angiotensin I) (Ang I); Angiotensin-2 (Angiotensin 1-8) (Angiotensin II) (Ang II); Angiotensin-3 (Angiotensin 2-8) (Angiotensin III) (Ang III) (Des-Asp[1]-angiotensin II); Angiotensin-4 (Angiotensin 3-8) (Angiotensin IV) (Ang IV); Angiotensin 1-9; Angiotensin 1-7; Angiotensin 1-5; Angiotensin 1-4]	Agt	0.167087	0.00700427	0.400758	0.00192169	2.12057	0.361874	0.781844	0.567613	brain processes-related
P21995	EMB_MOUSE	Embigin (Teratocarcinoma glycoprotein Gp-70)	Emb	1.1464	0.344278	0.651752	0.00157417	1.01971	0.901741	1.12565	0.366656	brain processes-related
P35922	FMR1_MOUSE	Synaptic functional regulator FMR1 (Fragile X mental retardation protein 1 homolog) (FMRP) (Protein FMR-1) (mFmr1p)	Fmr1	0.975334	0.853768	1.54779	0.0298813	1.00714	0.956943	0.954436	0.776379	brain processes-related
P50114	S100B_MOUSE	Protein S100-B (S-100 protein beta chain) (S-100 protein subunit beta) (S100 calcium-binding protein B)	S100b	0.607582	0.00746612	0.657059	0.00183881	1.16171	0.445331	0.998919	0.994846	brain processes-related
P51880	FABP7_MOUSE	Fatty acid-binding protein, brain (Brain lipid-binding protein) (BLBP) (Brain-type fatty acid-binding protein) (B-FABP) (Fatty acid-binding protein 7)	Fabp7	0.873379	0.674954	1.06444	0.840111	0.312984	0.00109064	0.670053	0.138924	brain processes-related
P51906	EAA3_MOUSE	Excitatory amino acid transporter 3 (Excitatory amino-acid carrier 1) (Sodium-dependent glutamate/aspartate transporter 3) (Solute carrier family 1 member 1)	Slc1a1	1.00273	0.991986	1.10744	0.801136	0.459286	0.00860426	0.933598	0.865738	brain processes-related
P52795	EFNB1_MOUSE	Ephrin-B1 (CEK5 receptor ligand) (CEK5-L) (EFL-3) (ELK ligand) (ELK-L) (EPH-related receptor tyrosine kinase ligand 2) (LERK-2) (Stimulated by retinoic acid gene 1 protein) [Cleaved into: Ephrin-B1 C-terminal fragment (Ephrin-B1 CTF); Ephrin-B1 intracellular domain (Ephrin-B1 ICD)]	Efnb1	2.01371	0.0205083	0.561108	0.258277	0.72009	0.10341	1.38697	0.0750946	brain processes-related
P63040	CPLX1_MOUSE	Complexin-1 (921-S) (Complexin I) (CPX I) (Synaphin-2)	Cplx1	1.12363	0.684332	1.03701	0.891361	1.14538	0.485126	1.60884	0.0479618	brain processes-related
P97318	DAB1_MOUSE	Disabled homolog 1	Dab1	0.515838	0.0679832	0.528268	0.259224	1.10423	0.851787	2.60333	0.0377086	brain processes-related
P97785	GFRA1_MOUSE	GDNF family receptor alpha-1 (GDNF receptor alpha-1) (GDNFR-alpha-1) (GFR-alpha-1) (TGF-beta-related neurotrophic factor receptor 1)	Gfra1	1.09763	0.758509	0.71234	0.26992	2.20034	0.0127742	2.05712	0.0527119	brain processes-related
Q0V8T9	CTP5A_MOUSE	Contactin-associated protein like 5-1 (Cell recognition molecule Caspr5-1) (Cell recognition molecule Caspr5a) (Contactin-associated protein-like 5a)	Cntnap5a;Cntnap5c	0.501704	0.0179701	0.837901	0.717579	1.15254	0.689954	1.08184	0.852879	brain processes-related
Q2WF71	LRFN1_MOUSE	Leucine-rich repeat and fibronectin type III domain-containing protein 1 (Synaptic adhesion-like molecule 2) (Synaptic differentiation-enhancing molecule 1)	Lrfn1	1.10078	0.588956	0.624186	0.00260684	0.917526	0.585728	1.52728	0.0418178	brain processes-related
Q3UGX3	NAT8L_MOUSE	N-acetylaspartate synthetase (NAA synthetase) (EC 2.3.1.17) (N-acetyltransferase 8-like protein) (Protein Shati)	Nat8l	0.986342	0.967523	1.79539	0.007748	0.901303	0.76142	0.542061	0.00674968	brain processes-related
Q61772	EPHA7_MOUSE	Ephrin type-A receptor 7 (EC 2.7.10.1) (Developmental kinase 1) (mDK-1) (EPH homology kinase 3) (EHK-3) (Embryonic brain kinase) (EBK)	Epha7	1.47966	0.407199	1.35183	0.566141	0.290564	0.0220656	0.76633	0.613417	brain processes-related
Q61941	NNTM_MOUSE	NAD(P) transhydrogenase, mitochondrial (EC 7.1.1.1) (Nicotinamide nucleotide transhydrogenase) (Pyridine nucleotide transhydrogenase)	Nnt	0.434322	0.00861298	0.546239	0.0460625	2.4096	0.0551824	1.96477	0.103231	brain processes-related
Q689Z5	SBNO1_MOUSE	Protein strawberry notch homolog 1 (mSno1)	Sbno1	0.368497	0.00984552	0.699943	0.270492	1.85849	0.24899	1.1004	0.792856	brain processes-related
Q6DFW0	CI072_MOUSE	Guanine nucleotide exchange C9orf72 homolog		0.643638	0.0497551	1.11849	0.517274	1.71008	0.03156	0.965319	0.727806	brain processes-related
Q6NSQ9	G6PC3_MOUSE	Glucose-6-phosphatase 3 (G-6-Pase 3) (G6Pase 3) (EC 3.1.3.9) (Ubiquitous glucose-6-phosphatase catalytic subunit-related protein)	G6pc3	1.04801	0.908055	2.47381	0.0245029	1.08325	0.833357	0.489915	0.073561	brain processes-related
Q761V0	SC6A5_MOUSE	Sodium- and chloride-dependent glycine transporter 2 (GlyT-2) (GlyT2) (Solute carrier family 6 member 5)	Slc6a5	0.804659	0.567008	0.835741	0.680812	0.358296	0.0436118	0.287251	0.0398882	brain processes-related
Q7TPH6	MYCB2_MOUSE	E3 ubiquitin-protein ligase MYCBP2 (EC 2.3.2.33) (Myc-binding protein 2) (Pam/highwire/rpm-1 protein) (Protein Magellan) (Protein associated with Myc)	Mycbp2	1.50664	0.00699113	0.95954	0.760554	0.92982	0.541705	1.0621	0.586963	brain processes-related
Q80TG9	LRFN2_MOUSE	Leucine-rich repeat and fibronectin type-III domain-containing protein 2	Lrfn2	0.460133	0.0160945	0.987629	0.954609	1.21141	0.498679	0.838915	0.542661	brain processes-related
Q80WT0	JPH4_MOUSE	Junctophilin-4 (JP-4) (Junctophilin-like 1 protein)	Jph4	1.84078	0.219704	0.996205	0.995512	0.250845	0.0466197	1.12682	0.829099	brain processes-related
Q80XG9	LRRT4_MOUSE	Leucine-rich repeat transmembrane neuronal protein 4	Lrrtm4	1.63228	0.0354823	1.05816	0.869912	0.702078	0.127554	0.947171	0.890231	brain processes-related
Q80XU3	NUCKS_MOUSE	Nuclear ubiquitous casein and cyclin-dependent kinase substrate 1 (JC7)	Nucks1	2.57203	0.0223596	1.20286	0.402092	0.443474	0.0337108	0.848437	0.354201	brain processes-related
Q80YE4	LMTK1_MOUSE	Serine/threonine-protein kinase LMTK1 (EC 2.7.11.1) (Apoptosis-associated tyrosine kinase) (AATYK) (Brain apoptosis-associated tyrosine kinase) (Lemur tyrosine kinase 1)	Aatk	1.06685	0.795077	0.474966	0.00553502	1.13571	0.448946	1.24364	0.465868	brain processes-related
Q8BLU0	FLRT2_MOUSE	Leucine-rich repeat transmembrane protein FLRT2 (Fibronectin leucine rich transmembrane protein 2)	Flrt2	0.63711	0.0803368	0.634209	0.0027931	1.5181	0.129314	1.67453	0.00177546	brain processes-related
Q8BM13	NOE2_MOUSE	Noelin-2 (Olfactomedin-2)	Olfm2	1.30332	0.10617	1.6112	0.0177461	0.729658	0.137214	0.850275	0.311219	brain processes-related
Q8BNA6	FAT3_MOUSE	Protocadherin Fat 3 (FAT tumor suppressor homolog 3)	Fat3	0.474068	0.0276015	0.630317	0.24685	1.95263	0.149916	1.04918	0.923929	brain processes-related
Q8BR86	KIRR3_MOUSE	Kin of IRRE-like protein 3 (Kin of irregular chiasm-like protein 3) (Nephrin-like protein 2) (mKirre) [Cleaved into: Processed kin of IRRE-like protein 3]	Kirrel3	0.174201	0.0263891	1.10774	0.865128	4.20168	0.098616	1.90855	0.127461	brain processes-related
Q8BTU1	CFA20_MOUSE	Cilia- and flagella-associated protein 20 (Gene trap locus 3 protein)	Cfap20	0.37145	0.0497504	1.01738	0.952473	2.99644	0.016878	0.831929	0.575804	brain processes-related
Q8C3P7	MTA70_MOUSE	N6-adenosine-methyltransferase subunit METTL3 (EC 2.1.1.348) (Methyltransferase-like protein 3) (N6-adenosine-methyltransferase 70 kDa subunit) (MT-A70)	Mettl3	0.537298	0.302024	0.243908	0.0151273	3.95925	0.0769764	1.68784	0.411975	brain processes-related
Q8CA72	GAN_MOUSE	Gigaxonin	Gan	0.545332	0.117407	0.900274	0.501839	1.42742	0.467813	0.508122	0.00297776	brain processes-related
Q8K097	LFG2_MOUSE	Protein lifeguard 2 (Fas apoptotic inhibitory molecule 2) (Neural membrane protein 35)	Faim2	1.21512	0.0677665	1.23239	0.0995593	0.939788	0.705538	0.655144	0.00255468	brain processes-related
Q8K209	AGRG1_MOUSE	Adhesion G-protein coupled receptor G1 (G-protein coupled receptor 56) (Serpentine receptor cyt28) [Cleaved into: ADGRG1 N-terminal fragment (ADGRG1 NT) (GPR56 N-terminal fragment) (GPR56 NT) (GPR56(N)) (GPR56 extracellular subunit) (GPR56 subunit alpha); ADGRG1 C-terminal fragment (ADGRG1-CT) (GPR56 C-terminal fragment) (GPR56 CT) (GPR56(C)) (GPR56 seven-transmembrane subunit) (GPR56 7TM) (GPR56…	Gpr56	0.752293	0.237804	0.865646	0.0933967	1.56879	0.0499132	1.00512	0.942916	brain processes-related
Q8K3C3	LZIC_MOUSE	Protein LZIC (Leucine zipper and CTNNBIP1 domain-containing protein) (Leucine zipper and ICAT homologous domain-containing protein)	Lzic	0.811247	0.486066	0.362536	0.00608229	0.569071	0.206994	1.56491	0.159732	brain processes-related
Q91Z69	SRGP1_MOUSE	SLIT-ROBO Rho GTPase-activating protein 1 (srGAP1) (Rho GTPase-activating protein 13)	Srgap1	0.314639	0.00628024	0.365835	0.18363	3.0027	0.107685	1.68075	0.41716	brain processes-related
Q923Z0	GPC5B_MOUSE	G-protein coupled receptor family C group 5 member B (Retinoic acid-induced gene 2 protein) (RAIG-2)	Gprc5b	1.64954	0.0058549	1.13541	0.656723	0.442685	0.00127962	0.6101	0.0467262	brain processes-related
Q99JW4	LIMS1_MOUSE	LIM and senescent cell antigen-like-containing domain protein 1 (Particularly interesting new Cys-His protein 1) (PINCH-1)	Lims1	0.487073	0.0155494	1.01149	0.966358	1.45677	0.146301	0.943665	0.837808	brain processes-related
Q99MR0	ACL6B_MOUSE	Actin-like protein 6B (53 kDa BRG1-associated factor B) (Actin-related protein Baf53b) (ArpN-alpha) (ArpNa) (BRG1-associated factor 53B) (BAF53B)	Actl6b	1.71148	0.043096	1.06715	0.793801	1.00948	0.969688	1.22065	0.444916	brain processes-related
Q99P58	RB27B_MOUSE	Ras-related protein Rab-27B (EC 3.6.5.2)	Rab27b	1.33654	0.0247933	0.828701	0.296558	0.604919	0.0249283	0.997925	0.991259	brain processes-related
Q9D187	CIA2B_MOUSE	Cytosolic iron-sulfur assembly component 2B (Mitotic spindle-associated MMXD complex subunit MIP18)	Fam96b	0.984196	0.977992	0.311365	0.0431327	0.883642	0.862899	1.66079	0.42406	brain processes-related
Q9D1F4	AKTS1_MOUSE	Proline-rich AKT1 substrate 1 (Proline-rich AKT substrate)	Akt1s1	0.575972	0.0506547	1.09768	0.695632	2.0279	0.00924188	1.04283	0.828205	brain processes-related
Q9D328	NACHO_MOUSE	Novel acetylcholine receptor chaperone (Peroxisomal membrane protein 52) (PMP52) (Transmembrane protein 35A)	Tmem35	1.3395	0.218896	0.846626	0.461758	0.48633	0.0227694	1.14384	0.571629	brain processes-related
Q9DBC3	CMTR1_MOUSE	Cap-specific mRNA (nucleoside-2'-O-)-methyltransferase 1 (EC 2.1.1.57) (Cap methyltransferase 1) (Cap1 2'O-ribose methyltransferase 1) (MTr1) (FtsJ methyltransferase domain-containing protein 2)	Cmtr1	0.807527	0.366097	0.323833	0.000715467	0.765828	0.540163	3.04115	0.0124669	brain processes-related
Q9ERB0	SNP29_MOUSE	Synaptosomal-associated protein 29 (SNAP-29) (Golgi SNARE of 32 kDa) (Gs32) (Soluble 29 kDa NSF attachment protein) (Vesicle-membrane fusion protein SNAP-29)	Snap29	0.708966	0.223087	1.36151	0.549102	0.574361	0.245934	0.14731	0.0323553	brain processes-related
Q9JJ43	RFOX1_MOUSE	RNA binding protein fox-1 homolog 1 (Ataxin-2-binding protein 1) (Fox-1 homolog A)	Rbfox1	0.403072	0.0393137	0.82842	0.699491	1.64038	0.386493	0.542875	0.372293	brain processes-related
Q9JJA9	GRASP_MOUSE	General receptor for phosphoinositides 1-associated scaffold protein (GRP1-associated scaffold protein)	Grasp	2.18254	0.0784232	0.365909	0.0132793	0.688529	0.292062	1.90957	0.245781	brain processes-related
Q9JK45	KCNQ5_MOUSE	Potassium voltage-gated channel subfamily KQT member 5 (KQT-like 5) (Potassium channel subunit alpha KvLQT5) (Voltage-gated potassium channel subunit Kv7.5)	Kcnq5	0.610859	0.193025	0.563101	0.0356555	0.992014	0.986694	1.40292	0.146456	brain processes-related
Q9JKD3	SCAM5_MOUSE	Secretory carrier-associated membrane protein 5 (Secretory carrier membrane protein 5)	Scamp5	0.746893	0.1843	1.52681	0.0268531	0.839665	0.479336	0.803724	0.190003	brain processes-related
Q9JKF1	IQGA1_MOUSE	Ras GTPase-activating-like protein IQGAP1	Iqgap1	0.691239	0.00802361	0.961812	0.700724	1.61371	0.000555754	0.932636	0.475977	brain processes-related
Q9R0N8	SYT6_MOUSE	Synaptotagmin-6 (Synaptotagmin VI) (SytVI)	Syt6	0.898456	0.602161	0.511602	0.00452255	0.62825	0.168783	1.12751	0.669201	brain processes-related
Q9WU28	PFD5_MOUSE	Prefoldin subunit 5 (EIG-1) (Myc modulator 1) (c-Myc-binding protein Mm-1)	Pfdn5	1.72816	0.0239998	1.32039	0.169454	0.681254	0.149409	0.713154	0.223825	brain processes-related
Q9WV31	ARC_MOUSE	Activity-regulated cytoskeleton-associated protein (mArc) (Activity-regulated gene 3.1 protein) (ARC/ARG3.1) (Arg3.1)	Arc	1.09185	0.86542	1.86795	0.0284706	0.596509	0.416874	0.596906	0.044726	brain processes-related

## Sheet: 4-45 enzyme catalysis
Supplemental Table S5-4. The dys-regulated enzyme proteins.
1) The 45 enzyme catalysis-related proteins in Table S5-1 (see Column M) were listed here.
Protein ID	Entry name	Protein names	Gene	model vs control, left cerebrum		model vs control, right cerebrum		SIM vs model, left cerebrum		SIM vs model, right cerebrum		category
				Fold change	p value	Fold change	p value	Fold change	p value	Fold change	p value
A3KFX0	5NT1A_MOUSE	Cytosolic 5'-nucleotidase 1A (cN1A) (EC 3.1.3.5) (Cytosolic 5'-nucleotidase IA) (cN-IA)	Nt5c1a	1.08771	0.786258	0.964417	0.89174	0.747447	0.44869	0.537847	0.0232947	enzyme catalysis
B7ZMP1	XPP3_MOUSE	Xaa-Pro aminopeptidase 3 (X-Pro aminopeptidase 3) (EC 3.4.11.9) (Aminopeptidase P3) (APP3)	Xpnpep3	0.32849	0.0480378	0.733851	0.205608	2.24599	0.0938796	0.854545	0.373689	enzyme catalysis
P06802	ENPP1_MOUSE	Ectonucleotide pyrophosphatase/phosphodiesterase family member 1 (E-NPP 1) (Lymphocyte antigen 41) (Ly-41) (Phosphodiesterase I/nucleotide pyrophosphatase 1) (Plasma-cell membrane glycoprotein PC-1) [Cleaved into: Ectonucleotide pyrophosphatase/phosphodiesterase family member 1, secreted form] [Includes: Alkaline phosphodiesterase I (EC 3.1.4.1); Nucleotide pyrophosphatase (NPPase) (EC 3.6.1.9) (…	Enpp1	2.23862	0.171945	0.871074	0.663814	0.706939	0.411169	0.25318	0.045096	enzyme catalysis
P07310	KCRM_MOUSE	Creatine kinase M-type (EC 2.7.3.2) (Creatine kinase M chain) (Creatine phosphokinase M-type) (CPK-M) (M-CK)	Ckm	1.85558	0.0668749	1.45147	0.448062	0.336422	0.0050091	0.182454	0.0280484	enzyme catalysis
P09470	ACE_MOUSE	Angiotensin-converting enzyme (ACE) (EC 3.2.1.-) (EC 3.4.15.1) (Dipeptidyl carboxypeptidase I) (Kininase II) (CD antigen CD143) [Cleaved into: Angiotensin-converting enzyme, soluble form]	Ace	1.17896	0.370288	0.876965	0.314846	0.47717	0.00276273	1.01012	0.953789	enzyme catalysis
P13634	CAH1_MOUSE	Carbonic anhydrase 1 (EC 4.2.1.1) (Carbonate dehydratase I) (Carbonic anhydrase I) (CA-I)	Ca1	0.656024	0.00024738	0.57557	0.000210068	0.813367	0.110554	1.03692	0.762461	enzyme catalysis
P35123	UBP4_MOUSE	Ubiquitin carboxyl-terminal hydrolase 4 (EC 3.4.19.12) (Deubiquitinating enzyme 4) (Ubiquitin thioesterase 4) (Ubiquitin-specific-processing protease 4) (Ubiquitous nuclear protein)	Usp4	1.05977	0.858893	0.77193	0.297889	1.07524	0.828829	2.04524	0.0166467	enzyme catalysis
P52623	UCK1_MOUSE	Uridine-cytidine kinase 1 (UCK 1) (EC 2.7.1.48) (Cytidine monophosphokinase 1) (Uridine monophosphokinase 1)	Uck1	0.407909	0.045055	0.829352	0.478542	2.30259	0.0630484	0.840273	0.655821	enzyme catalysis
P97364	SPS2_MOUSE	Selenide, water dikinase 2 (EC 2.7.9.3) (Selenium donor protein 2) (Selenophosphate synthase 2)	Sephs2	0.296834	0.0454128	0.566215	0.436579	3.26933	0.0679457	3.06245	0.0361928	enzyme catalysis
Q2TA57	ASPH1_MOUSE	Aspartate beta-hydroxylase domain-containing protein 1 (EC 1.14.11.-)	Asphd1	0.579522	0.113051	0.547019	0.111023	1.29055	0.554306	2.27626	0.00927833	enzyme catalysis
Q3UHD2	GFOD1_MOUSE	Glucose-fructose oxidoreductase domain-containing protein 1 (EC 1.-.-.-)	Gfod1	0.597461	0.312177	2.46951	0.134368	0.373218	0.0486122	0.836651	0.700761	enzyme catalysis
Q60805	MERTK_MOUSE	Tyrosine-protein kinase Mer (EC 2.7.10.1) (Proto-oncogene c-Mer) (Receptor tyrosine kinase MerTK)	Mertk;Axl	0.484212	0.364753	1.56681	0.557662	5.10075	0.0110133	2.75767	0.125758	enzyme catalysis
Q61161	M4K2_MOUSE	Mitogen-activated protein kinase kinase kinase kinase 2 (EC 2.7.11.1) (Germinal center kinase) (GCK) (MAPK/ERK kinase kinase kinase 2) (MEK kinase kinase 2) (MEKKK 2) (Rab8-interacting protein)	Map4k2	0.780985	0.290878	0.653507	0.0151603	1.20541	0.392142	1.16603	0.363392	enzyme catalysis
Q62095	DDX3Y_MOUSE	ATP-dependent RNA helicase DDX3Y (EC 3.6.4.13) (D1Pas1-related sequence 1) (DEAD box protein 3, Y-chromosomal) (DEAD-box RNA helicase DEAD2) (mDEAD2)	Ddx3y	2.65698	0.0436444	1.30092	0.590985	0.993814	0.987061	0.981238	0.970765	enzyme catalysis
Q64444	CAH4_MOUSE	Carbonic anhydrase 4 (EC 4.2.1.1) (Carbonate dehydratase IV) (Carbonic anhydrase IV) (CA-IV)	Ca4	0.914364	0.407102	0.654749	0.0126117	1.1546	0.228723	1.65159	0.00949423	enzyme catalysis
Q64669	NQO1_MOUSE	NAD(P)H dehydrogenase [quinone] 1 (EC 1.6.5.2) (Azoreductase) (DT-diaphorase) (DTD) (Menadione reductase) (NAD(P)H:quinone oxidoreductase 1) (Phylloquinone reductase) (Quinone reductase 1) (QR1)	Nqo1	1.1774	0.665007	0.579517	0.364046	0.349435	0.00820592	1.4954	0.480259	enzyme catalysis
Q69ZP3	PNKD_MOUSE	Probable hydrolase PNKD (EC 3.-.-.-) (Myofibrillogenesis regulator 1) (MR-1) (Paroxysmal nonkinesiogenic dyskinesia protein)	Pnkd	1.10414	0.680447	0.733208	0.224673	0.521913	0.0381901	0.979225	0.949666	enzyme catalysis
Q6A009	LTN1_MOUSE	E3 ubiquitin-protein ligase listerin (EC 2.3.2.27) (RING finger protein 160) (RING-type E3 ubiquitin transferase listerin) (Zinc finger protein 294) (Zfp-294)	Ltn1	0.786476	0.41147	0.912682	0.68643	0.887705	0.708464	0.452679	0.0269068	enzyme catalysis
Q6ZPS6	AKIB1_MOUSE	Ankyrin repeat and IBR domain-containing protein 1 (EC 2.3.2.31)	Ankib1	0.96575	0.84848	0.847545	0.328073	0.586915	0.0171556	0.733287	0.253543	enzyme catalysis
Q80U04	PJA2_MOUSE	E3 ubiquitin-protein ligase Praja-2 (Praja2) (EC 2.3.2.27) (RING finger protein 131) (RING-type E3 ubiquitin transferase Praja-2)	Pja2	0.956025	0.907701	0.408323	0.0282352	1.35531	0.388316	0.765708	0.567999	enzyme catalysis
Q80ZJ1	RAP2A_MOUSE	Ras-related protein Rap-2a (EC 3.6.5.2)	Rap2a	1.01863	0.90883	1.5132	0.0459884	1.30636	0.204324	1.02228	0.882835	enzyme catalysis
Q8BGR9	UBCP1_MOUSE	Ubiquitin-like domain-containing CTD phosphatase 1 (EC 3.1.3.16) (Nuclear proteasome inhibitor UBLCP1)	Ublcp1	0.659541	0.0147263	0.92203	0.704909	1.48721	0.098323	1.404	0.11608	enzyme catalysis
Q8BIG7	CMTD1_MOUSE	Catechol O-methyltransferase domain-containing protein 1 (EC 2.1.1.-)	Comtd1	1.05648	0.875186	1.99022	0.00933348	1.41244	0.339369	0.825338	0.307553	enzyme catalysis
Q8BMZ5	SEN34_MOUSE	tRNA-splicing endonuclease subunit Sen34 (EC 4.6.1.16) (Leukocyte receptor cluster member 5 homolog) (tRNA-intron endonuclease Sen34)	Tsen34	0.253892	0.0154372	0.699833	0.523899	4.14712	0.0861785	0.898241	0.865502	enzyme catalysis
Q8BZZ3	WWP1_MOUSE	NEDD4-like E3 ubiquitin-protein ligase WWP1 (EC 2.3.2.26) (HECT-type E3 ubiquitin transferase WWP1) (WW domain-containing protein 1)	Wwp1	1.08476	0.762893	1.01853	0.96051	0.957517	0.88668	1.67445	0.0433737	enzyme catalysis
Q8CAK1	CAF17_MOUSE	Putative transferase CAF17 homolog, mitochondrial (EC 2.1.-.-) (Iron-sulfur cluster assembly factor homolog)	Iba57	1.05945	0.629111	1.07523	0.712616	1.14316	0.212437	1.5407	0.00546405	enzyme catalysis
Q8CES0	NAA30_MOUSE	N-alpha-acetyltransferase 30 (EC 2.3.1.256) (N-acetyltransferase 12) (N-acetyltransferase MAK3 homolog) (NatC catalytic subunit)	Naa30	2.43762	0.00702347	0.769122	0.28046	0.790742	0.295198	1.17772	0.440889	enzyme catalysis
Q8K093	TRHDE_MOUSE	Thyrotropin-releasing hormone-degrading ectoenzyme (TRH-DE) (TRH-degrading ectoenzyme) (EC 3.4.19.6) (Pyroglutamyl-peptidase II) (PAP-II) (TRH-specific aminopeptidase) (Thyroliberinase)	Trhde	0.435195	0.0307189	0.925466	0.77927	1.43745	0.298467	0.811973	0.50454	enzyme catalysis
Q8VCV1	AB17C_MOUSE	Alpha/beta hydrolase domain-containing protein 17C (Abhydrolase domain-containing protein 17C) (EC 3.1.2.22)	Abhd17c	0.646542	0.0665819	1.15909	0.700509	1.48687	0.189472	1.58545	0.045615	enzyme catalysis
Q91XU0	WRIP1_MOUSE	ATPase WRNIP1 (EC 3.6.1.-) (Werner helicase-interacting protein 1)	Wrnip1	1.50989	0.088105	2.09379	0.0128942	1.08555	0.733413	0.840268	0.550892	enzyme catalysis
Q91YL2	RN126_MOUSE	E3 ubiquitin-protein ligase RNF126 (EC 2.3.2.27) (RING finger protein 126)	Rnf126	1.01477	0.917883	1.08487	0.683823	0.543676	0.00617497	0.822767	0.388077	enzyme catalysis
Q99KB8	GLO2_MOUSE	Hydroxyacylglutathione hydrolase, mitochondrial (EC 3.1.2.6) (Glyoxalase II) (Glx II)	Hagh	0.988544	0.951183	0.655259	0.0219921	0.941972	0.734492	1.27117	0.226826	enzyme catalysis
Q9CQT1	MTNA_MOUSE	Methylthioribose-1-phosphate isomerase (M1Pi) (MTR-1-P isomerase) (EC 5.3.1.23) (S-methyl-5-thioribose-1-phosphate isomerase) (Translation initiation factor eIF-2B subunit alpha/beta/delta-like protein)	Mri1	0.488584	0.000342727	0.884313	0.643698	1.3864	0.116465	1.66689	0.25054	enzyme catalysis
Q9D1I5	MCEE_MOUSE	Methylmalonyl-CoA epimerase, mitochondrial (EC 5.1.99.1) (DL-methylmalonyl-CoA racemase)	Mcee	0.872607	0.650492	0.551538	0.0181286	0.91848	0.823218	0.723758	0.399559	enzyme catalysis
Q9DBH0	WWP2_MOUSE	NEDD4-like E3 ubiquitin-protein ligase WWP2 (EC 2.3.2.26) (HECT-type E3 ubiquitin transferase WWP2) (WW domain-containing protein 2)	Wwp2	0.264296	0.0250849	0.95645	0.920846	2.77185	0.088966	1.12013	0.832755	enzyme catalysis
Q9EQK7	ICMT_MOUSE	Protein-S-isoprenylcysteine O-methyltransferase (EC 2.1.1.100) (Isoprenylcysteine carboxylmethyltransferase) (Prenylated protein carboxyl methyltransferase) (PPMT) (Prenylcysteine carboxyl methyltransferase) (pcCMT)	Icmt	1.04333	0.859441	1.61136	0.306621	0.360986	0.0173766	0.423871	0.0445441	enzyme catalysis
Q9ES74	NEK7_MOUSE	Serine/threonine-protein kinase Nek7 (EC 2.7.11.1) (Never in mitosis A-related kinase 7) (NimA-related protein kinase 7)	Nek7	1.26262	0.243531	1.05809	0.686062	0.672929	0.102154	0.452236	0.00165162	enzyme catalysis
Q9JI78	NGLY1_MOUSE	Peptide-N(4)-(N-acetyl-beta-glucosaminyl)asparagine amidase (PNGase) (mPNGase) (EC 3.5.1.52) (N-glycanase 1) (Peptide:N-glycanase)	Ngly1	8.64276	0.0326529	1.78153	0.259902	0.48048	0.206317	1.81846	0.329827	enzyme catalysis
Q9JJ61	GLT16_MOUSE	Polypeptide N-acetylgalactosaminyltransferase 16 (EC 2.4.1.41) (Polypeptide GalNAc transferase 16) (GalNAc-T16) (Polypeptide GalNAc transferase-like protein 1) (GalNAc-T-like protein 1) (pp-GaNTase-like protein 1) (Polypeptide N-acetylgalactosaminyltransferase-like protein 1) (Protein-UDP acetylgalactosaminyltransferase-like protein 1) (UDP-GalNAc:polypeptide N-acetylgalactosaminyltransferase-lik…	Galnt16	0.749394	0.175247	0.577143	0.000388787	1.08795	0.681011	1.29282	0.164439	enzyme catalysis
Q9JMA2	TGT_MOUSE	Queuine tRNA-ribosyltransferase catalytic subunit 1 (EC 2.4.2.64) (Guanine insertion enzyme) (tRNA-guanine transglycosylase)	Qtrt1	0.880134	0.744014	0.355149	0.0289657	0.571352	0.355702	1.04524	0.943185	enzyme catalysis
Q9QYK9	KCC1B_MOUSE	Calcium/calmodulin-dependent protein kinase type 1B (EC 2.7.11.17) (CaM kinase I beta) (CaM kinase IB) (CaM-KI beta) (CaMKI-beta) (Pregnancy up-regulated non-ubiquitously-expressed CaM kinase homolog)	Pnck	1.73447	0.0845442	0.333129	0.0335014	0.797167	0.34132	1.90797	0.0680022	enzyme catalysis
Q9Z0N2	IF2H_MOUSE	Eukaryotic translation initiation factor 2 subunit 3, Y-linked (EC 3.6.5.3) (Eukaryotic translation initiation factor 2 subunit gamma, Y-linked) (eIF-2-gamma Y) (Spermatogonial proliferation factor) (Spy)	Eif2s3y	0.814486	0.688273	4.5938	0.0274382	0.595846	0.362172	0.43865	0.106131	enzyme catalysis
Q9Z2L6	MINP1_MOUSE	Multiple inositol polyphosphate phosphatase 1 (EC 3.1.3.62) (2,3-bisphosphoglycerate 3-phosphatase) (2,3-BPG phosphatase) (EC 3.1.3.80) (Inositol (1,3,4,5)-tetrakisphosphate 3-phosphatase) (Ins(1,3,4,5)P(4) 3-phosphatase)	Minpp1	1.08367	0.823475	0.549769	0.0256759	0.876059	0.628281	1.47586	0.303458	enzyme catalysis
Q9Z2M7	PMM2_MOUSE	Phosphomannomutase 2 (PMM 2) (EC 5.4.2.8)	Pmm2	0.919137	0.598057	0.515857	0.013309	0.948157	0.708267	1.47703	0.0732105	enzyme catalysis
O70250	PGAM2_MOUSE	Phosphoglycerate mutase 2 (EC 5.4.2.11) (EC 5.4.2.4) (BPG-dependent PGAM 2) (Muscle-specific phosphoglycerate mutase) (Phosphoglycerate mutase isozyme M) (PGAM-M)	Pgam2	1.23578	0.0248984	0.999986	0.999923	0.652965	0.0110455	0.981368	0.904039	enzyme catalysis

## Sheet: 5-47 transport regulation
Supplemental Table S5-5. The transport-related dys-regulated proteins.
1) The 47 transport regulation-related proteins in Table S5-1 (see Column M) were listed here.
Protein ID	Entry name	Protein names	Gene	model vs control, left cerebrum		model vs control, right cerebrum		SIM vs model, left cerebrum		SIM vs model, right cerebrum		category
				Fold change	p value	Fold change	p value	Fold change	p value	Fold change	p value
O08581	KCNK1_MOUSE	Potassium channel subfamily K member 1 (Inward rectifying potassium channel protein TWIK-1)	Kcnk1	1.02666	0.958345	0.849496	0.749214	0.331293	0.115033	0.154142	0.0313281	transport regulation
P04919	B3AT_MOUSE	Band 3 anion transport protein (Anion exchange protein 1) (AE 1) (Anion exchanger 1) (MEB3) (Solute carrier family 4 member 1) (CD antigen CD233)	Slc4a1	0.6391	0.00331382	0.687389	0.0282325	1.02386	0.841281	0.970867	0.751328	transport regulation
P07309	TTHY_MOUSE	Transthyretin (Prealbumin)	Ttr	1.16539	0.487766	0.85268	0.564874	0.415485	0.00347577	0.717354	0.298509	transport regulation
P54116	STOM_MOUSE	Stomatin (Erythrocyte band 7 integral membrane protein) (Erythrocyte membrane protein band 7.2) (Protein 7.2b)	Stom	0.369061	0.000328595	0.953032	0.907395	1.80495	0.118882	1.5227	0.191732	transport regulation
P59648	FXYD7_MOUSE	FXYD domain-containing ion transport regulator 7	Fxyd7	1.35362	0.531333	0.938779	0.882649	1.85907	0.0485483	0.926354	0.820386	transport regulation
P61967	AP1S1_MOUSE	AP-1 complex subunit sigma-1A (Adaptor protein complex AP-1 subunit sigma-1A) (Adaptor-related protein complex 1 subunit sigma-1A) (Clathrin assembly protein complex 1 sigma-1A small chain) (Clathrin coat assembly protein AP19) (Golgi adaptor HA1/AP1 adaptin sigma-1A subunit) (HA1 19 kDa subunit) (Sigma 1a subunit of AP-1 clathrin) (Sigma-adaptin 1A) (Sigma1A-adaptin)	Ap1s1	0.61844	0.411036	3.60776	0.0425228	0.683202	0.573452	0.378222	0.0920041	transport regulation
P62075	TIM13_MOUSE	Mitochondrial import inner membrane translocase subunit Tim13	Timm13	1.19066	0.514066	1.18417	0.58353	0.337894	0.0104032	0.89149	0.728146	transport regulation
P63143	KCAB1_MOUSE	Voltage-gated potassium channel subunit beta-1 (EC 1.1.1.-) (K(+) channel subunit beta-1) (Kv-beta-1)	Kcnab1	1.18983	0.285807	1.63088	0.0439103	0.757172	0.116454	0.624189	0.0294437	transport regulation
P84084	ARF5_MOUSE	ADP-ribosylation factor 5	Arf5	1.03071	0.875483	1.35351	0.0389769	0.969556	0.87517	0.627876	0.0101583	transport regulation
Q09143	SL7A1_MOUSE	High affinity cationic amino acid transporter 1 (CAT-1) (CAT1) (Ecotropic retroviral leukemia receptor) (Ecotropic retrovirus receptor) (ERR) (Solute carrier family 7 member 1) (System Y+ basic amino acid transporter)	Slc7a1	0.694883	0.512677	0.297751	0.0230105	2.06994	0.150099	2.59001	0.0838406	transport regulation
Q14B80	KCNC2_MOUSE	Potassium voltage-gated channel subfamily C member 2 (Shaw-like potassium channel) (Voltage-gated potassium channel Kv3.2)	Kcnc2	1.10422	0.661084	0.994738	0.98831	0.44324	0.00849706	1.06656	0.847943	transport regulation
Q3TMP8	TM38A_MOUSE	Trimeric intracellular cation channel type A (TRIC-A) (TRICA) (27 kDa sarcoplasmic reticulum protein) (Mitsugumin-33A) (SPR-27) (Transmembrane protein 38A)	Tmem38a	0.608538	0.0365348	0.681419	0.0960484	0.751527	0.46513	1.19668	0.557206	transport regulation
Q3TWI9	CSCL2_MOUSE	CSC1-like protein 2 (Transmembrane protein 63B)	Tmem63b	1.93201	0.0558756	0.819033	0.709033	0.429967	0.0364261	1.16065	0.786163	transport regulation
Q61625	GRID2_MOUSE	Glutamate receptor ionotropic, delta-2 (GluD2) (GluR delta-2 subunit)	Grid2	0.67795	0.0648314	0.913005	0.632089	0.602323	0.0309604	0.626017	0.0634062	transport regulation
Q61923	KCNA6_MOUSE	Potassium voltage-gated channel subfamily A member 6 (MK1.6) (Voltage-gated potassium channel subunit Kv1.6)	Kcna6	1.41474	0.0920167	0.855803	0.509457	0.622039	0.0186261	0.797185	0.426054	transport regulation
Q62172	RBP1_MOUSE	RalA-binding protein 1 (RalBP1) (Dinitrophenyl S-glutathione ATPase) (DNP-SG ATPase) (EC 7.6.2.2) (EC 7.6.2.3) (Ral-interacting protein 1)	Ralbp1	0.979718	0.949713	1.05978	0.862199	1.19868	0.557323	1.92063	0.0322928	transport regulation
Q63829	COMD3_MOUSE	COMM domain-containing protein 3 (Bmi-1 upstream gene protein) (Bup protein)	Commd3	0.840139	0.649338	0.772334	0.690153	0.742798	0.579837	0.159351	0.0321441	transport regulation
Q69ZZ6	TMCC1_MOUSE	Transmembrane and coiled-coil domains protein 1	Tmcc1	1.6017	0.0891828	0.992978	0.978664	0.475102	0.00853683	0.601576	0.102243	transport regulation
Q6P4T1	SNX19_MOUSE	Sorting nexin-19	Snx19	0.439376	0.0131948	1.16042	0.675921	0.716345	0.523161	0.540006	0.119989	transport regulation
Q6PHS6	SNX13_MOUSE	Sorting nexin-13	Snx13	1.36323	0.421998	1.66423	0.217683	0.232612	0.0352131	0.686417	0.295777	transport regulation
Q80TT2	BAIP3_MOUSE	BAI1-associated protein 3 (BAP3) (Brain-specific angiogenesis inhibitor I-associated protein 3) (Baiap3)	Baiap3	1.10622	0.758253	0.463324	0.00324025	1.01764	0.9422	1.30558	0.288984	transport regulation
Q80UP8	S20A2_MOUSE	Sodium-dependent phosphate transporter 2 (Phosphate transporter 2) (PiT-2) (Solute carrier family 20 member 2) (Type III sodium-dependent phosphate transporter)	Slc20a2	0.760571	0.644486	1.36664	0.496228	2.41767	0.159451	0.21148	0.0116852	transport regulation
Q80Y56	RBNS5_MOUSE	Rabenosyn-5 (FYVE finger-containing Rab5 effector protein rabenosyn-5) (RAB effector RBSN) (Zinc finger FYVE domain-containing protein 20)	Rbsn	1.15455	0.361588	0.578654	0.015483	0.773446	0.18492	1.08403	0.754673	transport regulation
Q8BH60	GOPC_MOUSE	Golgi-associated PDZ and coiled-coil motif-containing protein (PDZ protein interacting specifically with TC10) (PIST)	Gopc	1.41621	0.111932	1.05625	0.839956	0.595626	0.0298229	1.09495	0.654339	transport regulation
Q8BHK2	SCN3B_MOUSE	Sodium channel subunit beta-3	Scn3b	1.14286	0.765225	0.456389	0.02358	0.638189	0.318298	1.32473	0.438994	transport regulation
Q8BSZ2	AP3S2_MOUSE	AP-3 complex subunit sigma-2 (AP-3 complex subunit sigma-3B) (Adaptor-related protein complex 3 subunit sigma-2) (Sigma-3B-adaptin) (Sigma3B-adaptin) (Sigma-adaptin 3b)	Ap3s2	1.13992	0.136111	0.667763	0.0146715	0.92302	0.253868	1.2142	0.354871	transport regulation
Q8BXK8	AGAP1_MOUSE	Arf-GAP with GTPase, ANK repeat and PH domain-containing protein 1 (AGAP-1) (Centaurin-gamma-2) (Cnt-g2)	Agap1	0.97535	0.868256	1.31125	0.085175	0.722062	0.116444	0.659364	0.00788206	transport regulation
Q8BXR1	S7A14_MOUSE	Probable cationic amino acid transporter (Solute carrier family 7 member 14)	Slc7a14	1.504	0.054317	0.895695	0.579326	0.578204	0.0163021	1.10348	0.573542	transport regulation
Q8C0J2	A16L1_MOUSE	Autophagy-related protein 16-1 (APG16-like 1)	Atg16l1	0.873688	0.488306	0.85479	0.360028	0.588096	0.0393666	1.17885	0.579352	transport regulation
Q8C547	HTR5B_MOUSE	HEAT repeat-containing protein 5B	Heatr5b	0.562809	0.011039	1.15046	0.584739	1.98128	0.00598837	1.35185	0.178491	transport regulation
Q8K0X8	FEZ1_MOUSE	Fasciculation and elongation protein zeta-1 (Zygin I) (Zygin-1)	Fez1	1.06896	0.774788	0.854887	0.615432	0.499936	0.0302257	0.911274	0.78083	transport regulation
Q8K1E0	STX5_MOUSE	Syntaxin-5	Stx5	0.619784	0.0276163	0.780225	0.310106	1.32587	0.304332	0.981124	0.945181	transport regulation
Q8K1R3	PNPT1_MOUSE	Polyribonucleotide nucleotidyltransferase 1, mitochondrial (EC 2.7.7.8) (3'-5' RNA exonuclease OLD35) (PNPase old-35) (Polynucleotide phosphorylase 1) (PNPase 1) (Polynucleotide phosphorylase-like protein)	Pnpt1	1.60329	0.0379604	0.94424	0.813588	0.518676	0.00148926	0.744245	0.199032	transport regulation
Q8R0Y8	S2542_MOUSE	Mitochondrial coenzyme A transporter SLC25A42 (Solute carrier family 25 member 42)	Slc25a42	1.02047	0.907355	3.16156	6.28395e-05	1.15774	0.415482	0.864104	0.34806	transport regulation
Q8R3I3	COG6_MOUSE	Conserved oligomeric Golgi complex subunit 6 (COG complex subunit 6) (Component of oligomeric Golgi complex 6)	Cog6	1.30005	0.674883	0.407096	0.04895	0.406558	0.286918	1.24267	0.68678	transport regulation
Q9CPQ8	ATP5L_MOUSE	ATP synthase subunit g, mitochondrial (ATPase subunit g) (ATP synthase membrane subunit g)	Atp5l	1.09946	0.350946	1.52581	0.0282741	1.5087	0.0320314	0.920169	0.601611	transport regulation
Q9CQ85	TIM22_MOUSE	Mitochondrial import inner membrane translocase subunit Tim22	Timm22	0.709518	0.324504	0.615327	0.229719	1.45159	0.274467	2.95258	0.00161787	transport regulation
Q9CZR3	TM40L_MOUSE	Mitochondrial import receptor subunit TOM40B (Protein TOMM40-like)	Tomm40l	1.50288	0.00924739	1.14704	0.224576	0.80821	0.117852	1.06033	0.594781	transport regulation
Q9D1H7	GET4_MOUSE	Golgi to ER traffic protein 4 homolog	Get4	0.739782	0.568571	0.450424	0.0177138	1.81017	0.121947	1.87236	0.0924895	transport regulation
Q9D2V7	CORO7_MOUSE	Coronin-7 (Crn7) (70 kDa WD repeat tumor rejection antigen homolog)	Coro7	2.80973	0.000710319	2.40218	0.000628464	0.288269	0.00126278	0.498193	0.0681164	transport regulation
Q9D8S3	ARFG3_MOUSE	ADP-ribosylation factor GTPase-activating protein 3 (ARF GAP 3)	Arfgap3	0.929952	0.80611	1.20073	0.571732	0.857589	0.67164	0.371064	0.0411991	transport regulation
Q9EPK2	XRP2_MOUSE	Protein XRP2	Rp2	0.702278	0.268835	0.905429	0.763598	0.475817	0.0442894	1.36014	0.338057	transport regulation
Q9JI39	ABCBA_MOUSE	ATP-binding cassette sub-family B member 10, mitochondrial (ABC-mitochondrial erythroid protein) (ABC-me protein) (ATP-binding cassette transporter 10) (ABC transporter 10 protein)	Abcb10	1.24083	0.592013	0.356421	0.0328049	1.01166	0.972991	1.7545	0.143892	transport regulation
Q9QY81	PO210_MOUSE	Nuclear pore membrane glycoprotein 210 (Nuclear pore protein gp210) (Nuclear envelope pore membrane protein POM 210) (POM210) (Nucleoporin Nup210) (Pore membrane protein of 210 kDa)	Nup210	0.956042	0.83628	0.968126	0.919699	0.586468	0.0482925	0.717386	0.40656	transport regulation
Q9R0A0	PEX14_MOUSE	Peroxisomal membrane protein PEX14 (PTS1 receptor-docking protein) (Peroxin-14) (Peroxisomal membrane anchor protein PEX14)	Pex14	1.42634	0.0695067	0.531195	0.0109652	0.87374	0.521772	1.56404	0.0725747	transport regulation
Q9WVD5	ORNT1_MOUSE	Mitochondrial ornithine transporter 1 (Solute carrier family 25 member 15)	Slc25a15	1.47935	0.379515	0.322764	0.0380425	0.445755	0.118891	1.52139	0.575789	transport regulation
Q9Z0W3	NU160_MOUSE	Nuclear pore complex protein Nup160 (160 kDa nucleoporin) (Gene trap locus 1-13 protein) (GTL-13) (Nucleoporin Nup160)	Nup160	0.415655	4.63656e-05	0.834926	0.423946	2.09207	0.00147439	1.29966	0.203183	transport regulation

## Sheet: 6-16 transcription regulation
Supplemental Table S5-6. The transcription-related dys-regulated proteins.
1) The 16 transcription regulation-related proteins in Table S5-1 (see Column M) were listed here.
Protein ID	Entry name	Protein names	Gene	model vs control, left cerebrum		model vs control, right cerebrum		SIM vs model, left cerebrum		SIM vs model, right cerebrum		category
				Fold change	p value	Fold change	p value	Fold change	p value	Fold change	p value
P06537	GCR_MOUSE	Glucocorticoid receptor (GR) (Nuclear receptor subfamily 3 group C member 1)	Nr3c1	1.57793	0.0224424	0.784254	0.344783	0.683641	0.0957988	1.17515	0.476779	transcription regulation
P08775	RPB1_MOUSE	DNA-directed RNA polymerase II subunit RPB1 (RNA polymerase II subunit B1) (EC 2.7.7.6) (DNA-directed RNA polymerase II subunit A) (DNA-directed RNA polymerase III largest subunit)	Polr2a	1.14049	0.760029	0.588748	0.0479616	1.00949	0.976826	0.914682	0.815734	transcription regulation
P10711	TCEA1_MOUSE	Transcription elongation factor A protein 1 (Transcription elongation factor S-II protein 1) (Transcription elongation factor TFIIS.o)	Tcea1	1.76505	0.0160403	0.893867	0.691405	0.573129	0.0172681	0.748368	0.243935	transcription regulation
P23198	CBX3_MOUSE	Chromobox protein homolog 3 (Heterochromatin protein 1 homolog gamma) (HP1 gamma) (M32) (Modifier 2 protein)	Cbx3	1.53132	0.0425923	0.911292	0.388725	0.859591	0.357101	1.12508	0.207281	transcription regulation
Q3THK3	T2FA_MOUSE	General transcription factor IIF subunit 1 (Transcription initiation factor IIF subunit alpha) (TFIIF-alpha)	Gtf2f1	1.17103	0.296882	1.04389	0.864402	0.433506	0.00118063	1.09347	0.689188	transcription regulation
Q8BXC6	COMD2_MOUSE	COMM domain-containing protein 2	Commd2	0.499208	0.141842	0.748982	0.552635	1.58072	0.363192	2.02234	0.028104	transcription regulation
Q8CJG1	AGO1_MOUSE	Protein argonaute-1 (Argonaute1) (mAgo1) (Argonaute RISC catalytic component 1) (Eukaryotic translation initiation factor 2C 1) (eIF-2C 1) (eIF2C 1) (Piwi/argonaute family protein meIF2C1)	Ago1	0.867909	0.499501	1.73688	0.0033081	0.717429	0.153579	0.798262	0.293713	transcription regulation
Q8R409	HEXI1_MOUSE	Protein HEXIM1 (Cardiac lineage protein 1)	Hexim1	0.96661	0.91359	0.441317	0.0175651	0.514969	0.104554	0.394578	0.164271	transcription regulation
Q99020	ROAA_MOUSE	Heterogeneous nuclear ribonucleoprotein A/B (hnRNP A/B) (CArG-binding factor-A) (CBF-A)	Hnrnpab	1.19757	0.295063	1.65097	0.0369666	1.17508	0.175521	0.862854	0.459276	transcription regulation
Q9ERA0	TFCP2_MOUSE	Alpha-globin transcription factor CP2	Tfcp2	2.26772	0.0233244	1.51537	0.134364	0.496269	0.0202182	0.402184	0.0155759	transcription regulation
Q9ERF3	WDR61_MOUSE	WD repeat-containing protein 61 (Meiotic recombination REC14 protein homolog) [Cleaved into: WD repeat-containing protein 61, N-terminally processed]	Wdr61	0.517461	0.00711243	1.13665	0.511839	1.0961	0.688934	0.831782	0.327694	transcription regulation
Q9JKY0	CNOT9_MOUSE	CCR4-NOT transcription complex subunit 9 (Cell differentiation protein RQCD1 homolog) (Rcd-1) (EPO-induced protein FL10)	Rqcd1	2.34369	0.0217281	1.04158	0.888766	0.641641	0.171015	1.14621	0.657351	transcription regulation
Q9JMG1	EDF1_MOUSE	Endothelial differentiation-related factor 1 (EDF-1) (Multiprotein-bridging factor 1) (MBF1)	Edf1	1.28633	0.0106971	1.04049	0.811526	0.627809	0.032005	0.601251	0.0693604	transcription regulation
Q9Z277	BAZ1B_MOUSE	Tyrosine-protein kinase BAZ1B (EC 2.7.10.2) (Bromodomain adjacent to zinc finger domain protein 1B) (Williams syndrome transcription factor homolog) (Williams-Beuren syndrome chromosomal region 9 protein homolog)	Baz1b	0.725011	0.537312	1.6926	0.383203	0.133194	0.0410435	0.335449	0.107007	transcription regulation
P53996	CNBP_MOUSE	Cellular nucleic acid-binding protein (CNBP) (Zinc finger protein 9)	Cnbp	4.88951	0.0401222	0.689641	0.642505	0.755269	0.520647	0.749169	0.791201	transcription regulation
O08784	TCOF_MOUSE	Treacle protein (Treacher Collins syndrome protein homolog)	Tcof1	1.17018	0.42035	1.06004	0.709285	0.657807	0.0487241	1.07925	0.670146	transcription regulation

## Sheet: 7-134 other
Supplemental Table S5-7. The other dys-regulated proteins.
1) The 134 dys-regulated proteins categorized as "other" in Table S5-1 (see Column M) were listed here.
Protein ID	Entry name	Protein names	Gene	model vs control, left cerebrum		model vs control, right cerebrum		SIM vs model, left cerebrum		SIM vs model, right cerebrum		category
				Fold change	p value	Fold change	p value	Fold change	p value	Fold change	p value
A2AHG0	LZTS3_MOUSE	Leucine zipper putative tumor suppressor 3 (ProSAP-interacting protein 1) (ProSAPiP1)	Lzts3	1.10569	0.590566	1.90344	0.0306293	0.787169	0.141878	1.08655	0.59377	others
B1AVZ0	UPP_MOUSE	Uracil phosphoribosyltransferase homolog	Uprt	0.768542	0.393971	1.15577	0.30413	0.939438	0.85298	0.504877	0.0036703	others
B2RXR6	ANR44_MOUSE	Serine/threonine-protein phosphatase 6 regulatory ankyrin repeat subunit B (PP6-ARS-B) (Serine/threonine-protein phosphatase 6 regulatory subunit ARS-B) (Ankyrin repeat domain-containing protein 44)	Ankrd44	0.445137	0.0246944	0.454139	0.0198847	0.21557	0.106511	1.33149	0.525937	others
B9EJI9	T229A_MOUSE	Transmembrane protein 229A	Tmem229a	1.86243	0.0761548	1.04459	0.909755	0.493392	0.0290724	0.527116	0.211825	others
O08677	KNG1_MOUSE	Kininogen-1 [Cleaved into: Kininogen-1 heavy chain; Bradykinin; Kininogen-1 light chain]	Kng1	0.514175	0.0452518	0.476212	0.111155	1.71287	0.119418	1.06713	0.797408	others
O08715	AKAP1_MOUSE	A-kinase anchor protein 1, mitochondrial (Dual specificity A-kinase-anchoring protein 1) (D-AKAP-1) (Protein kinase A-anchoring protein 1) (PRKA1) (Spermatid A-kinase anchor protein) (S-AKAP)	Akap1	0.944448	0.762675	1.53317	0.0971408	1.046	0.84207	0.566938	0.0490974	others
O35607	BMPR2_MOUSE	Bone morphogenetic protein receptor type-2 (BMP type-2 receptor) (BMPR-2) (EC 2.7.11.30) (BRK-3) (Bone morphogenetic protein receptor type II) (BMP type II receptor) (BMPR-II)	Bmpr2	0.675075	0.148666	0.709255	0.194251	1.68158	0.0373795	0.922178	0.771268	others
O89086	RBM3_MOUSE	RNA-binding protein 3 (RNA-binding motif protein 3)	Rbm3	0.121605	0.00792589	1.69138	0.107854	7.01963	0.050737	0.805076	0.54056	others
P01867	IGG2B_MOUSE	Ig gamma-2B chain C region	Igh-3	0.376846	0.00256319	0.403829	0.0184696	1.46011	0.215693	1.73245	0.146023	others
P01872	IGHM_MOUSE	Immunoglobulin heavy constant mu [Cleaved into: Mu' chain (55 kDa mu' chain)]	Ighm	1.7273	0.00692034	1.84558	0.000793703	1.22887	0.48213	1.27987	0.424484	others
P84244	H33_MOUSE	Histone H3.3	H3f3a;H3f3c	1.40106	0.0307637	2.04526	0.00281442	0.956073	0.821565	0.755789	0.113511	others
P02535	K1C10_MOUSE	Keratin, type I cytoskeletal 10 (56 kDa cytokeratin) (Cytokeratin-10) (CK-10) (Keratin, type I cytoskeletal 59 kDa) (Keratin-10) (K10)	Krt10	1.16286	0.747972	0.330227	0.0402271	3.81197	0.0661223	0.984875	0.951127	others
P06909	CFAH_MOUSE	Complement factor H (Protein beta-1-H)	Cfh	0.587455	0.0234921	0.636236	0.124246	0.983495	0.947671	0.931194	0.729322	others
P08032	SPTA1_MOUSE	Spectrin alpha chain, erythrocytic 1 (Erythroid alpha-spectrin)	Spta1	0.560306	0.146333	0.349914	0.000184528	0.990305	0.970691	1.21211	0.565967	others
P0DN34	NDUB1_MOUSE	NADH dehydrogenase [ubiquinone] 1 beta subcomplex subunit 1 (Complex I-MNLL) (CI-MNLL) (NADH-ubiquinone oxidoreductase MNLL subunit)	Ndufb1	0.61215	0.192238	0.540558	0.00996614	1.89679	0.0520456	1.84227	0.103404	others
P11276	FINC_MOUSE	Fibronectin (FN) [Cleaved into: Anastellin]	Fn1	0.552362	0.0108273	0.635222	0.16601	1.03831	0.862809	0.940121	0.720139	others
P16014	SCG1_MOUSE	Secretogranin-1 (Chromogranin-B) (CgB) (Secretogranin I) (SgI) [Cleaved into: CCB peptide; PE-11]	Chgb	0.954605	0.826053	0.59661	0.242617	1.03358	0.850446	2.24296	0.00191379	others
P20934	EVI2A_MOUSE	Protein EVI2A (Ecotropic viral integration site 2A protein) (EVI-2A)	Evi2a	1.07746	0.687216	0.937669	0.793667	0.632008	0.039014	0.770609	0.181421	others
P28651	CAH8_MOUSE	Carbonic anhydrase-related protein (CARP) (Carbonic anhydrase VIII) (CA-VIII)	Ca8	0.388439	0.0454084	1.10916	0.834975	0.494499	0.240562	0.154355	0.0426022	others
P29699	FETUA_MOUSE	Alpha-2-HS-glycoprotein (Countertrypin) (Fetuin-A)	Ahsg	0.709098	0.0619516	0.603265	0.0201963	1.39501	0.0846302	1.04303	0.815884	others
P37804	TAGL_MOUSE	Transgelin (Actin-associated protein p27) (Smooth muscle protein 22-alpha) (SM22-alpha)	Tagln	0.92694	0.606738	0.809473	0.0589058	0.621617	0.0402052	0.832308	0.360991	others
P47955	RLA1_MOUSE	60S acidic ribosomal protein P1	Rplp1	0.747659	0.65366	0.266423	0.142801	0.971072	0.959926	3.55355	0.0493323	others
P48024	EIF1_MOUSE	Eukaryotic translation initiation factor 1 (eIF1) (Protein translation factor SUI1 homolog)	Eif1	1.31114	0.23421	0.774215	0.274984	0.483889	0.00485513	0.925262	0.790151	others
P52760	RIDA_MOUSE	2-iminobutanoate/2-iminopropanoate deaminase (EC 3.5.99.10) (Heat-responsive protein 12) (Reactive intermediate imine deaminase A homolog) (Translation inhibitor L-PSP ribonuclease)	Hrsp12	1.1074	0.4327	0.98159	0.900456	0.608448	0.004094	0.934256	0.533903	others
P55772	ENTP1_MOUSE	Ectonucleoside triphosphate diphosphohydrolase 1 (NTPDase 1) (EC 3.6.1.5) (Ecto-ATP diphosphohydrolase 1) (Ecto-ATPDase 1) (Ecto-ATPase 1) (Ecto-apyrase) (Lymphoid cell activation antigen) (CD antigen CD39)	Entpd1	0.713929	0.350462	0.553856	0.0761163	0.701716	0.354827	2.02995	0.0253074	others
P57722	PCBP3_MOUSE	Poly(rC)-binding protein 3 (Alpha-CP3)	Pcbp3	0.953318	0.887785	1.40588	0.160117	0.880092	0.724449	0.643697	0.016228	others
P57784	RU2A_MOUSE	U2 small nuclear ribonucleoprotein A' (U2 snRNP A')	Snrpa1	0.993436	0.966937	0.974811	0.926771	0.628674	0.0226949	1.0155	0.950019	others
P59326	YTHD1_MOUSE	YTH domain-containing family protein 1 (Dermatomyositis associated with cancer putative autoantigen 1 homolog) (DACA-1 homolog)	Ythdf1	0.650608	0.20317	1.36746	0.487633	1.84792	0.0178463	0.531686	0.217459	others
P59481	LMA2L_MOUSE	VIP36-like protein (Lectin mannose-binding 2-like) (LMAN2-like protein)	Lman2l	0.626741	0.00501243	0.948828	0.726167	1.46183	0.0223344	0.728868	0.0891311	others
P61759	PFD3_MOUSE	Prefoldin subunit 3 (von Hippel-Lindau-binding protein 1) (VBP-1) (VHL-binding protein 1)	Vbp1	0.762834	0.178851	0.55092	0.0438247	1.09003	0.71927	1.28441	0.118771	others
P62267	RS23_MOUSE	40S ribosomal protein S23	Rps23	1.7181	0.158987	3.48235	0.0495397	0.493632	0.101093	1.60359	0.150748	others
P62737	ACTA_MOUSE	Actin, aortic smooth muscle (Alpha-actin-2) [Cleaved into: Actin, aortic smooth muscle, intermediate form]	Acta2	0.761661	0.051204	1.13723	0.565943	1.08657	0.419032	1.5671	0.00802974	others
P63168	DYL1_MOUSE	Dynein light chain 1, cytoplasmic (8 kDa dynein light chain) (DLC8) (Dynein light chain LC8-type 1) (Protein inhibitor of neuronal nitric oxide synthase) (PIN) (mPIN)	Dynll1	2.68132	0.0768629	2.40524	0.00859894	0.685697	0.362246	0.711541	0.171713	others
P63248	IPKA_MOUSE	cAMP-dependent protein kinase inhibitor alpha (PKI-alpha) (cAMP-dependent protein kinase inhibitor, muscle/brain isoform)	Pkia	0.70914	0.0808004	0.473696	0.00135645	1.32726	0.258155	1.56833	0.0196971	others
P68369	TBA1A_MOUSE	Tubulin alpha-1A chain (Alpha-tubulin 1) (Alpha-tubulin isotype M-alpha-1) (Tubulin alpha-1 chain) [Cleaved into: Detyrosinated tubulin alpha-1A chain]	Tuba1a;Tuba3a	1.0531	0.598551	1.36739	0.0693221	1.63544	0.0186786	1.17095	0.375345	others
Q00897	A1AT4_MOUSE	Alpha-1-antitrypsin 1-4 (Alpha-1 protease inhibitor 4) (Serine protease inhibitor 1-4) (Serine protease inhibitor A1d) (Serpin A1d)	Serpina1d	0.594657	0.0304916	0.410598	0.0123469	0.656961	0.279212	1.25769	0.540433	others
Q01730	RSU1_MOUSE	Ras suppressor protein 1 (RSP-1) (Rsu-1)	Rsu1	1.02831	0.944029	0.629076	0.276687	0.401241	0.0477659	0.931737	0.861007	others
Q02566	MYH6_MOUSE	Myosin-6 (Myosin heavy chain 6) (Myosin heavy chain, cardiac muscle alpha isoform) (MyHC-alpha)	Myh6	177.513	0.126121	3.34627	0.0607328	0	0.124282	0.18604	0.0319321	others
Q05D44	IF2P_MOUSE	Eukaryotic translation initiation factor 5B (eIF-5B) (EC 3.6.5.3) (Translation initiation factor IF-2)	Eif5b	1.424	0.155152	1.5338	0.0401913	0.681824	0.102196	0.722007	0.0878056	others
Q3LAC4	PREX2_MOUSE	Phosphatidylinositol 3,4,5-trisphosphate-dependent Rac exchanger 2 protein (P-Rex2) (PtdIns(3,4,5)-dependent Rac exchanger 2) (DEP domain-containing protein 2)	Prex2	1.54135	0.266993	1.83495	0.198709	0.265641	0.0178056	0.55846	0.194889	others
Q3TBW2	RM10_MOUSE	39S ribosomal protein L10, mitochondrial (L10mt) (MRP-L10)	Mrpl10	1.6092	0.137386	4.27264	0.0295436	0.689528	0.275259	0.674582	0.340275	others
Q3TC93	H1BP3_MOUSE	HCLS1-binding protein 3 (HS1-binding protein 3) (HSP1BP-3)	Hs1bp3	1.04537	0.929838	1.26988	0.529698	3.23959	0.0230121	1.48587	0.270502	others
Q3TPE9	ANKY2_MOUSE	Ankyrin repeat and MYND domain-containing protein 2	Ankmy2	0.664625	0.130444	1.01687	0.959813	1.56423	0.0869343	1.68957	0.0469676	others
Q3U1Y4	DEN4B_MOUSE	DENN domain-containing protein 4B (Brain-specific gene 4 protein) (Brain specific protein 4)	Dennd4b	0.385721	0.00368133	0.692218	0.411016	2.12911	0.0318771	1.19849	0.642695	others
Q3UI43	BABA1_MOUSE	BRISC and BRCA1-A complex member 1 (Mediator of RAP80 interactions and targeting subunit of 40 kDa) (New component of the BRCA1-A complex)	Babam1	0.933943	0.864446	0.466931	0.00945913	0.832024	0.613193	1.28579	0.49403	others
Q3V038	TTC9A_MOUSE	Tetratricopeptide repeat protein 9A (TPR repeat protein 9A)	Ttc9	1.34292	0.485207	0.735566	0.315429	0.548402	0.24755	1.68602	0.034006	others
Q4QQM4	P5I11_MOUSE	Tumor protein p53-inducible protein 11 (Transformation related protein 53 inducible protein 11) (p53-induced gene 11 protein)	Trp53i11	0.58147	0.0108609	1.028	0.873122	1.43137	0.0325165	1.18177	0.141286	others
Q5SSZ5	TENS3_MOUSE	Tensin-3 (Tensin-like SH2 domain-containing protein 1)	Tns3	1.41265	0.219251	0.902722	0.634395	0.470269	0.0178427	0.805358	0.311093	others
Q5SU73	COIL_MOUSE	Coilin (p80-coilin)	Coil	0.866307	0.393973	0.561379	0.00943514	0.590076	0.0758347	1.35164	0.199155	others
Q61220	NELL2_MOUSE	Protein kinase C-binding protein NELL2 (MEL91 protein) (NEL-like protein 2)	Nell2	1.75142	0.100891	1.22833	0.485981	0.254901	0.00197665	0.370979	0.029903	others
Q61249	IGBP1_MOUSE	Immunoglobulin-binding protein 1 (Alpha4 phosphoprotein) (CD79a-binding protein 1) (Lymphocyte signal transduction molecule alpha 4) (Protein phosphatase 2/4/6 regulatory subunit) (p52)	Igbp1	0.421731	0.150744	0.218768	4.6357e-05	1.83952	0.273956	1.60732	0.335635	others
Q61387	COX7R_MOUSE	Cytochrome c oxidase subunit 7A-related protein, mitochondrial (Cytochrome c oxidase subunit VIIa-related protein) (Silica-induced gene 81 protein) (SIG-81) (Supercomplex assembly factor I)	Cox7a2l	0.958802	0.875445	0.751257	0.389429	1.25103	0.351139	1.84099	0.0235908	others
Q62241	RU1C_MOUSE	U1 small nuclear ribonucleoprotein C (U1 snRNP C) (U1-C) (U1C)	Snrpc	1.09057	0.449742	0.940037	0.68138	0.642925	0.0185107	0.872346	0.512341	others
Q62245	SOS1_MOUSE	Son of sevenless homolog 1 (SOS-1) (mSOS-1)	Sos1	0.819392	0.409652	0.584308	0.0242024	0.737068	0.146517	1.17288	0.413634	others
Q66T02	PKHG5_MOUSE	Pleckstrin homology domain-containing family G member 5 (PH domain-containing family G member 5) (Synectin-binding RhoA exchange factor) (SYX)	Plekhg5	1.23285	0.532432	0.395543	0.0124295	1.46924	0.186425	2.16187	0.0241767	others
Q6A0D4	RFTN1_MOUSE	Raftlin (Raft-linking protein)	Rftn1	1.19318	0.667465	0.544915	0.0258494	0.694426	0.451541	1.16026	0.575109	others
Q6IEE6	T132E_MOUSE	Transmembrane protein 132E	Tmem132e	0.730966	0.237069	1.78962	0.0314848	1.19005	0.479361	0.737574	0.203204	others
Q6NWV3	IF122_MOUSE	Intraflagellar transport protein 122 homolog (WD repeat-containing protein 10)	Ift122	0.582985	0.205502	1.36497	0.344554	2.00914	0.0318258	0.445019	0.0490406	others
Q6P5G6	UBXN7_MOUSE	UBX domain-containing protein 7	Ubxn7	0.849679	0.495361	0.560138	0.0479177	0.970663	0.916943	1.43877	0.211307	others
Q6P5H6	FRMD5_MOUSE	FERM domain-containing protein 5	Frmd5	0.942885	0.711145	0.785959	0.103712	0.649427	0.0228428	0.661591	0.0239389	others
Q6P9J5	KANK4_MOUSE	KN motif and ankyrin repeat domain-containing protein 4 (Ankyrin repeat domain-containing protein 38)	Kank4	0.234028	0.0452851	1.74076	0.239599	2.04547	0.341996	0.508779	0.116361	others
Q6PE01	SNR40_MOUSE	U5 small nuclear ribonucleoprotein 40 kDa protein (U5 snRNP 40 kDa protein) (WD repeat-containing protein 57)	Snrnp40	0.729769	0.473634	0.874234	0.755772	0.29143	0.03309	0.417046	0.0135991	others
Q6PIP5	NUDC1_MOUSE	NudC domain-containing protein 1	Nudcd1	1.08661	0.658595	0.870301	0.43959	0.588088	0.0010099	1.0004	0.998619	others
Q6PNC0	DMXL1_MOUSE	DmX-like protein 1 (X-like 1 protein)	Dmxl1	1.55281	0.0349585	1.28581	0.381722	0.702868	0.0957805	0.913705	0.792417	others
Q6VN19	RBP10_MOUSE	Ran-binding protein 10 (RanBP10)	Ranbp10	1.92278	0.131293	1.12699	0.769824	0.327139	0.0355898	0.935338	0.857603	others
Q6ZWM4	LSM8_MOUSE	U6 snRNA-associated Sm-like protein LSm8	Lsm8	0.231131	0.00807372	1.54426	0.592318	1.90304	0.329463	2.26242	0.115557	others
Q80YE7	DAPK1_MOUSE	Death-associated protein kinase 1 (DAP kinase 1) (EC 2.7.11.1)	Dapk1	0.971676	0.957957	0.947833	0.941347	0.99641	0.99433	2.61062	0.0494764	others
Q8BG95	MYPT2_MOUSE	Protein phosphatase 1 regulatory subunit 12B (Myosin phosphatase-targeting subunit 2) (Myosin phosphatase target subunit 2)	Ppp1r12b	0.350915	0.0187299	0.838308	0.720519	0.895075	0.849281	0.911081	0.828103	others
Q8BGD8	COA6_MOUSE	Cytochrome c oxidase assembly factor 6 homolog	Coa6	1.1745	0.418698	0.774561	0.52977	0.529611	0.00764323	0.571586	0.271824	others
Q8BHL8	PSMF1_MOUSE	Proteasome inhibitor PI31 subunit	Psmf1	1.20614	0.224485	0.619039	0.00786473	0.984303	0.882008	1.33902	0.101593	others
Q8BHS3	RBM22_MOUSE	Pre-mRNA-splicing factor RBM22 (RNA-binding motif protein 22)	Rbm22	0.857127	0.56649	1.83408	0.0172959	0.967228	0.914888	0.650822	0.062375	others
Q8BM85	TBCK_MOUSE	TBC domain-containing protein kinase-like protein	Tbck	0.870286	0.501739	0.976317	0.911845	0.890001	0.612496	0.623684	0.0482596	others
Q8BN59	LARP6_MOUSE	La-related protein 6 (Acheron) (Achn) (La ribonucleoprotein domain family member 6)	Larp6	1.23487	0.221666	0.817044	0.388369	0.543074	0.00379106	1.08446	0.748415	others
Q8BYB9	PGLT1_MOUSE	Protein O-glucosyltransferase 1 (EC 2.4.1.376) (CAP10-like 46 kDa protein) (KTEL motif-containing protein 1) (O-glucosyltransferase Rumi homolog) (Rumi) (Protein O-xylosyltransferase POGLUT1) (EC 2.4.2.63) (Wing-shaped neural plate protein) (Wsnp)	Poglut1	0.49936	0.00707434	0.961653	0.919653	1.74366	0.0917914	1.21576	0.475849	others
Q8BYP3	RHOF_MOUSE	Rho-related GTP-binding protein RhoF	Rhof	1.90317	0.00669867	0.814323	0.384522	0.705741	0.09234	0.984806	0.962456	others
Q8C0D4	RHG12_MOUSE	Rho GTPase-activating protein 12 (Rho-type GTPase-activating protein 12)	Arhgap12	1.87413	0.0469729	0.765414	0.321971	0.294104	0.00713158	1.11574	0.678028	others
Q8C181	MBNL2_MOUSE	Muscleblind-like protein 2	Mbnl2	0.884837	0.713172	1.94191	0.00996238	1.23256	0.538467	0.449144	0.00902896	others
Q8C6S9	CFA54_MOUSE	Cilia- and flagella-associated protein 54	Cfap54	0.769757	0.478349	0.332494	0.0129223	0.872468	0.79434	2.01143	0.28005	others
Q8CD92	TTC27_MOUSE	Tetratricopeptide repeat protein 27 (TPR repeat protein 27)	Ttc27	4.39995	0.0437535	0.677937	0.341929	0.705195	0.395558	1.25154	0.579817	others
Q8CGC4	LS14B_MOUSE	Protein LSM14 homolog B (RNA-associated protein 55B) (mRAP55B)	Lsm14b	1.80868	0.127041	0.640032	0.430082	0.324198	0.028854	1.978	0.200796	others
Q8JZP9	GA2L1_MOUSE	GAS2-like protein 1 (Growth arrest-specific protein 2-like 1)	Gas2l1	1.30581	0.442494	1.04874	0.923286	0.349848	0.024998	1.34504	0.477158	others
Q8K070	SAM14_MOUSE	Sterile alpha motif domain-containing protein 14 (SAM domain-containing protein 14)	Samd14	1.00805	0.985458	1.15338	0.616303	0.664744	0.35801	0.373399	0.00828602	others
Q8K2Y9	CCM2_MOUSE	Cerebral cavernous malformations protein 2 homolog (Malcavernin) (Osmosensing scaffold for MEKK3)	Ccm2	1.27099	0.458159	0.6322	0.0372435	1.03157	0.907924	1.26355	0.323801	others
Q8QZT2	CCSAP_MOUSE	Centriole, cilia and spindle-associated protein	Ccsap	0.632862	0.0205882	0.938768	0.699238	1.22773	0.261741	1.06646	0.709629	others
Q8QZY9	SF3B4_MOUSE	Splicing factor 3B subunit 4	Sf3b4	1.24619	0.584699	4.18333	0.0202292	0.871046	0.725391	0.442039	0.075655	others
Q8R0A5	TCAL3_MOUSE	Transcription elongation factor A protein-like 3 (TCEA-like protein 3) (Transcription elongation factor S-II protein-like 3)	Tceal3;Tceal5	0.427291	0.0189288	0.750013	0.519206	1.23898	0.666747	0.811838	0.698615	others
Q8R124	KLH36_MOUSE	Kelch-like protein 36	Klhl36	0.662838	0.264429	0.546718	0.0148471	1.35404	0.392325	1.32178	0.311178	others
Q8R1T1	CHMP7_MOUSE	Charged multivesicular body protein 7 (Chromatin-modifying protein 7)	Chmp7	1.61949	0.0363914	1.69615	0.0413125	0.621964	0.0501096	0.916589	0.677447	others
Q8R516	MIB2_MOUSE	E3 ubiquitin-protein ligase MIB2 (EC 2.3.2.27) (Dystrophin-like protein) (Dyslike) (Mind bomb homolog 2) (Mind bomb-2) (RING-type E3 ubiquitin transferase MIB2) (Skeletrophin)	Mib2	2.56185	0.0285674	1.09123	0.88763	0.524093	0.0532552	1.14875	0.847417	others
Q8VCM7	FIBG_MOUSE	Fibrinogen gamma chain	Fgg	0.753547	0.244761	0.529254	0.0472266	0.777878	0.110619	1.02513	0.830523	others
Q8VE97	SRSF4_MOUSE	Serine/arginine-rich splicing factor 4 (Splicing factor, arginine/serine-rich 4)	Srsf4	1.01592	0.953146	0.548607	0.0202508	0.676036	0.251618	0.941521	0.889724	others
Q8VEE4	RFA1_MOUSE	Replication protein A 70 kDa DNA-binding subunit (RP-A p70) (Replication factor A protein 1) (RF-A protein 1)	Rpa1	0.867482	0.550998	0.636363	0.0213533	1.04031	0.802819	0.9552	0.848274	others
Q91VC7	PP14A_MOUSE	Protein phosphatase 1 regulatory subunit 14A (17 kDa PKC-potentiated inhibitory protein of PP1) (Protein kinase C-potentiated inhibitor protein of 17 kDa) (CPI-17)	Ppp1r14a	0.875531	0.495842	0.998543	0.994501	1.11517	0.602508	0.600769	0.0439164	others
Q91VR7	MLP3A_MOUSE	Microtubule-associated proteins 1A/1B light chain 3A (Autophagy-related protein LC3 A) (Autophagy-related ubiquitin-like modifier LC3 A) (MAP1 light chain 3-like protein 1) (MAP1A/MAP1B light chain 3 A) (MAP1A/MAP1B LC3 A) (Microtubule-associated protein 1 light chain 3 alpha)	Map1lc3a	1.36073	0.360909	0.70042	0.35431	1.06698	0.818746	1.80219	0.0349601	others
Q91XI1	DUS3L_MOUSE	tRNA-dihydrouridine(47) synthase [NAD(P)(+)]-like (EC 1.3.1.-) (tRNA-dihydrouridine synthase 3-like)	Dus3l	1.32558	0.219504	0.502155	0.0124861	0.777305	0.313968	0.805476	0.585765	others
Q91Z38	TTC1_MOUSE	Tetratricopeptide repeat protein 1 (TPR repeat protein 1)	Ttc1	1.78833	0.0232707	0.956719	0.871587	0.717144	0.213057	1.19315	0.526692	others
Q922Y1	UBXN1_MOUSE	UBX domain-containing protein 1 (Protein 2B28) (SAPK substrate protein 1) (UBA/UBX 33.3 kDa protein) (mY33K)	Ubxn1	1.51076	0.278302	1.6164	0.0375041	1.01659	0.962576	0.63685	0.0155565	others
Q99K48	NONO_MOUSE	Non-POU domain-containing octamer-binding protein (NonO protein)	Nono	1.34515	0.109116	1.14136	0.32546	0.639396	0.0390178	0.853335	0.189098	others
Q99LD9	EI2BB_MOUSE	Translation initiation factor eIF-2B subunit beta (eIF-2B GDP-GTP exchange factor subunit beta)	Eif2b2	0.995994	0.985134	0.789367	0.165357	0.488613	0.0497986	0.947533	0.786825	others
Q99MD9	NASP_MOUSE	Nuclear autoantigenic sperm protein (NASP)	Nasp	1.22191	0.680831	0.323021	0.0083095	1.18159	0.705243	1.18806	0.743622	others
Q99MS8	TPGS1_MOUSE	Tubulin polyglutamylase complex subunit 1 (PGs1) (p32)	Tpgs1	0.599803	0.150628	0.92912	0.740142	2.14648	0.0246021	0.838512	0.308243	others
Q99N87	RT05_MOUSE	28S ribosomal protein S5, mitochondrial (MRP-S5) (S5mt)	Mrps5	0.737243	0.0448848	1.166	0.472496	1.5933	0.00307374	0.812561	0.249466	others
Q9CQ06	RM24_MOUSE	39S ribosomal protein L24, mitochondrial (L24mt) (MRP-L24)	Mrpl24	0.944354	0.891756	1.59517	0.211977	1.97241	0.0382289	0.631937	0.271266	others
Q9CQ19	MYL9_MOUSE	Myosin regulatory light polypeptide 9 (Myosin regulatory light chain 2, smooth muscle isoform) (Myosin regulatory light chain 9)	Myl9	1.88333	0.336002	2.6648	0.0373798	0.672365	0.55094	1.1792	0.668706	others
Q9CQ91	NDUA3_MOUSE	NADH dehydrogenase [ubiquinone] 1 alpha subcomplex subunit 3 (Complex I-B9) (CI-B9) (NADH-ubiquinone oxidoreductase B9 subunit)	Ndufa3	1.07015	0.673494	0.67505	0.0227243	0.754685	0.0750792	0.66766	0.033524	others
Q9CQA6	CHCH1_MOUSE	Coiled-coil-helix-coiled-coil-helix domain-containing protein 1 (28S ribosomal protein S37, mitochondrial) (MRP-S37)	Chchd1	0.708476	0.56571	0.34292	0.0463589	1.32223	0.669151	2.57924	0.111859	others
Q9CQP2	TPPC2_MOUSE	Trafficking protein particle complex subunit 2 (Sedlin)	Trappc2	1.01556	0.982269	0.550546	0.0714283	1.17878	0.790032	1.94348	0.0391425	others
Q9CQU3	RER1_MOUSE	Protein RER1	Rer1	1.4235	0.499194	1.45912	0.290044	0.319181	0.0416327	0.229493	0.0120582	others
Q9CR09	UFC1_MOUSE	Ubiquitin-fold modifier-conjugating enzyme 1 (Ufm1-conjugating enzyme 1)	Ufc1	0.49845	0.189847	9.72482	0.00695245	2.6409	0.302659	0.782161	0.491922	others
Q9CWZ3	RBM8A_MOUSE	RNA-binding protein 8A (RNA-binding motif protein 8A) (Ribonucleoprotein RBM8A)	Rbm8a	0.432707	0.0428231	0.591261	0.132871	2.51453	0.024174	1.20974	0.62172	others
Q9CZR8	EFTS_MOUSE	Elongation factor Ts, mitochondrial (EF-Ts) (EF-TsMt)	Tsfm	1.03164	0.825841	0.778208	0.115334	0.970294	0.836001	1.54809	0.00499857	others
Q9D071	MMS19_MOUSE	MMS19 nucleotide excision repair protein homolog (MET18 homolog) (MMS19-like protein)	Mms19	0.597928	0.0167861	0.992448	0.957122	1.47445	0.067233	1.14133	0.333073	others
Q9D0A3	ARPIN_MOUSE	Arpin (Arp2/3 inhibition protein)	Arpin	0.190681	0.0167551	0.866337	0.761827	3.65239	0.0957817	0.872236	0.778377	others
Q9D0B6	PBDC1_MOUSE	Protein PBDC1 (Polysaccharide biosynthesis domain-containing protein 1)	Pbdc1	1.3993	0.218288	0.425873	0.033638	0.730397	0.215247	1.71076	0.0524504	others
Q9D0E3	LYSM1_MOUSE	LysM and putative peptidoglycan-binding domain-containing protein 1	Lysmd1	0.770366	0.248608	1.04719	0.781161	0.583369	0.0367684	0.997058	0.993702	others
Q9D1H8	RM53_MOUSE	39S ribosomal protein L53, mitochondrial (L53mt) (MRP-L53)	Mrpl53	0.719344	0.282536	0.811068	0.3275	1.71411	0.00623282	1.12578	0.660521	others
Q9D1K7	CT027_MOUSE	UPF0687 protein C20orf27 homolog		0.981259	0.906681	0.660878	0.00961691	0.848933	0.255853	1.29039	0.147076	others
Q9D1N9	RM21_MOUSE	39S ribosomal protein L21, mitochondrial (L21mt) (MRP-L21)	Mrpl21	1.83794	0.00801793	0.66839	0.0179219	0.951618	0.752489	1.25351	0.300197	others
Q9D338	RM19_MOUSE	39S ribosomal protein L19, mitochondrial (L19mt) (MRP-L19)	Mrpl19	1.2649	0.422844	1.58887	0.260613	0.472714	0.0327657	0.867092	0.640437	others
Q9D428	GOG7B_MOUSE	Golgin subfamily A member 7B	GOLGA7B	1.28338	0.36218	1.29572	0.239382	1.55355	0.0138252	0.741799	0.087031	others
Q9D7X1	KCTD4_MOUSE	BTB/POZ domain-containing protein KCTD4	Kctd4	0.939924	0.689437	0.662803	0.0215595	1.07352	0.662029	1.19439	0.426367	others
Q9D8X2	CC124_MOUSE	Coiled-coil domain-containing protein 124	Ccdc124	1.18416	0.527042	0.84507	0.629553	0.485581	0.00634227	1.13016	0.703293	others
Q9DBG7	SRPRA_MOUSE	Signal recognition particle receptor subunit alpha (SR-alpha) (Docking protein alpha) (DP-alpha)	Srpr	0.269981	0.0448184	0.330881	0.0310525	0.981095	0.979687	2.71088	0.0643798	others
Q9DBX2	PHLP_MOUSE	Phosducin-like protein (PHLP)	Pdcl	1.81873	0.20068	2.83904	0.0815246	0.543627	0.129254	0.106992	0.0131723	others
Q9DD18	DTD1_MOUSE	D-aminoacyl-tRNA deacylase 1 (DTD) (EC 3.1.1.96) (DNA-unwinding element-binding protein B) (DUE-B) (Gly-tRNA(Ala) deacylase)	Dtd1	2.882	0.0458898	1.19713	0.631085	0.435028	0.0854507	0.999763	0.999437	others
Q91VH6	MEMO1_MOUSE	Protein MEMO1 (Mediator of ErbB2-driven cell motility 1) (Memo-1)	Memo1	0.415054	0.0305123	0.63389	0.315945	1.38948	0.406165	1.11764	0.794536	others
Q9ERT9	PPR1A_MOUSE	Protein phosphatase 1 regulatory subunit 1A (Protein phosphatase inhibitor 1) (I-1) (IPP-1)	Ppp1r1a	0.485925	0.152188	0.444569	0.309267	3.44758	0.0154932	1.61261	0.328959	others
Q9JJR9	NRIP3_MOUSE	Nuclear receptor-interacting protein 3	Nrip3	0.910591	0.840399	1.36537	0.298272	0.88536	0.72521	0.161027	0.0012245	others
Q9JMD0	ZN207_MOUSE	BUB3-interacting and GLEBS motif-containing protein ZNF207 (BuGZ) (49 kDa zinc finger protein) (Zinc finger protein 207)	Znf207	0.929331	0.747833	2.23363	0.0701972	1.82679	0.0461641	0.781806	0.509182	others
Q9R0P4	SMAP_MOUSE	Small acidic protein (Sid 2057)	Smap	0.775811	0.516411	0.845649	0.638073	0.852411	0.736809	0.480853	0.0254739	others
Q9Z0G0	GIPC1_MOUSE	PDZ domain-containing protein GIPC1 (GAIP C-terminus-interacting protein) (RGS-GAIP-interacting protein) (RGS19-interacting protein 1) (SemaF cytoplasmic domain-associated protein 1) (SEMCAP-1) (Synectin)	Gipc1	1.04847	0.809507	0.892177	0.576521	0.503184	0.011811	0.984388	0.940501	others
Q9Z1P6	NDUA7_MOUSE	NADH dehydrogenase [ubiquinone] 1 alpha subcomplex subunit 7 (Complex I-B14.5a) (CI-B14.5a) (NADH-ubiquinone oxidoreductase subunit B14.5a)	Ndufa7	0.874898	0.505325	1.60381	0.0487853	1.23723	0.486249	0.794619	0.248596	others
Q99MR1	GGYF1_MOUSE	GRB10-interacting GYF protein 1 (PERQ amino acid-rich with GYF domain-containing protein 1)	Gigyf1	1.10666	0.755001	0.1693	0.00153884	0.977194	0.93711	2.82913	0.20243	others
P27573	MYP0_MOUSE	Myelin protein P0 (Myelin peripheral protein) (MPP) (Myelin protein zero)	Mpz	0.112411	0.0186165	1.89382	0.244713	5.28493	0.0534569	0.401035	0.154635	others
